# Supplementary material for: Autonomous Reaction Network Exploration in Homogeneous and Heterogeneous Catalysis
Source: PubMed Central journal article supplement (PMC8816766; doi:10.1007/s11244-021-01543-9), 2022-01-13

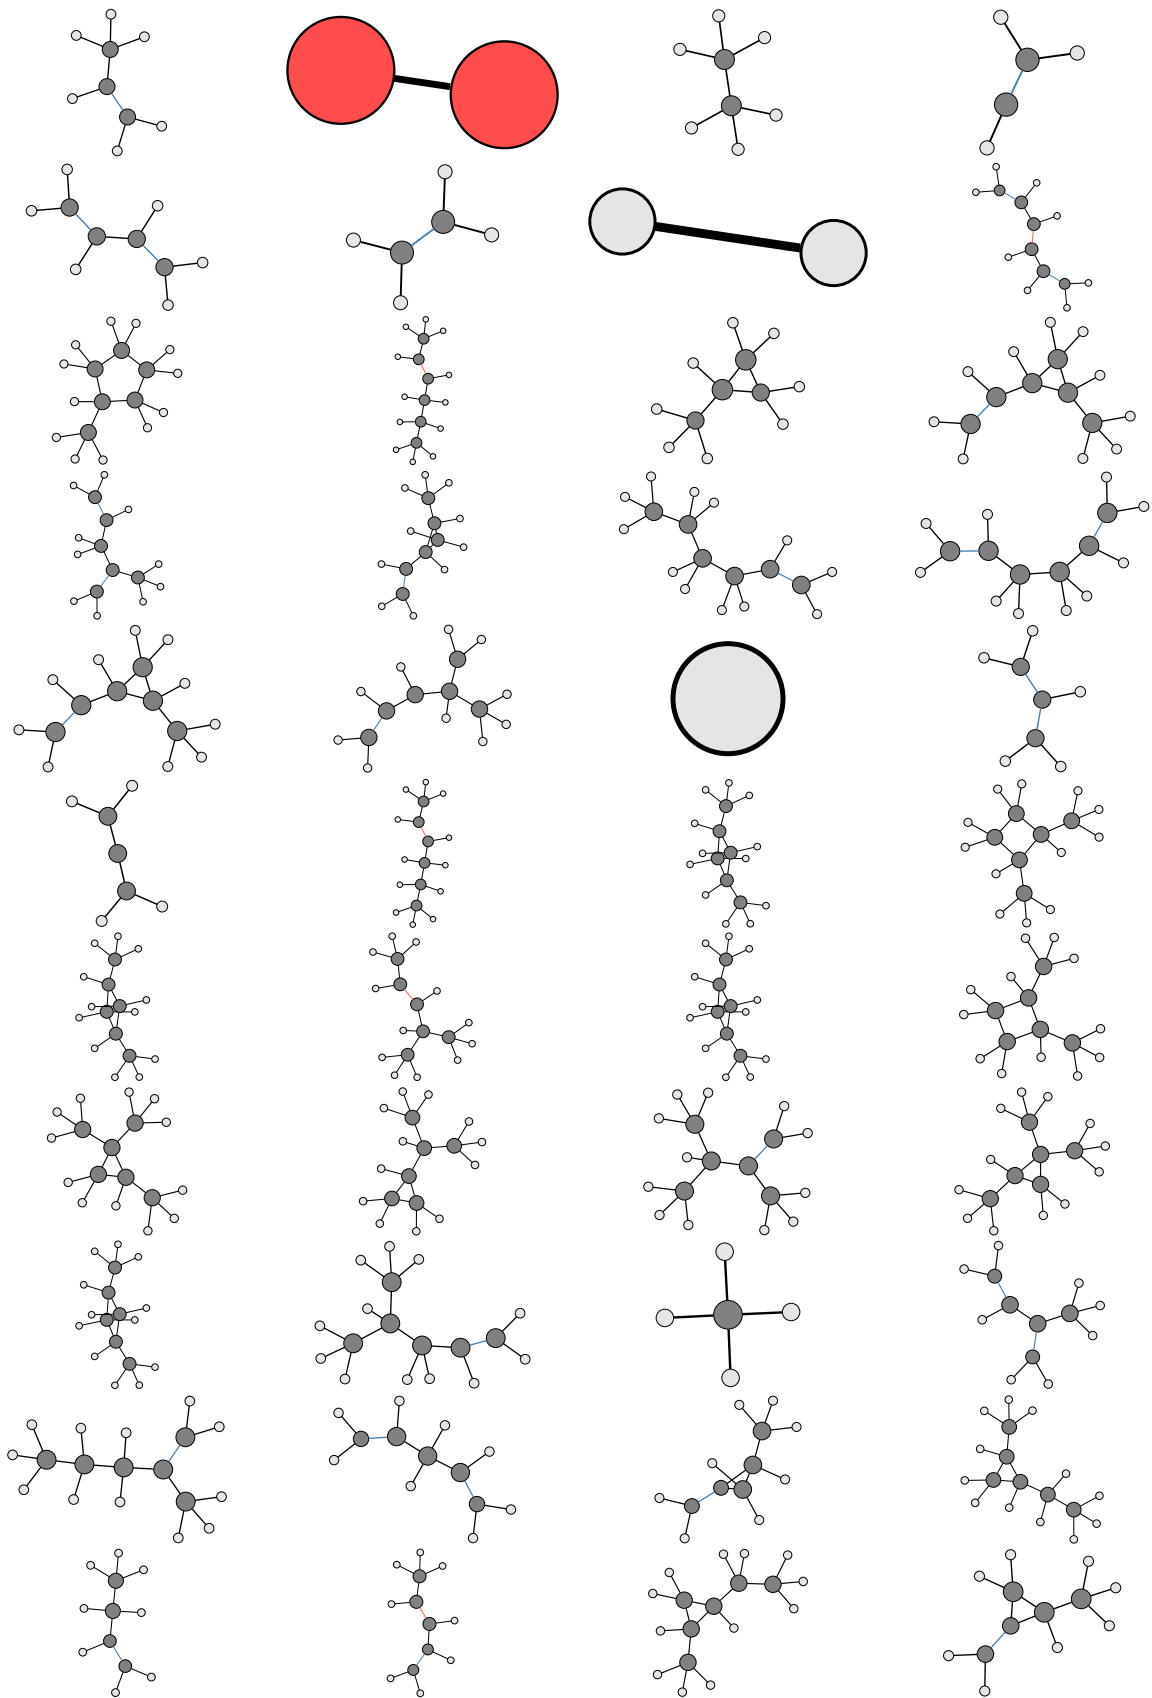

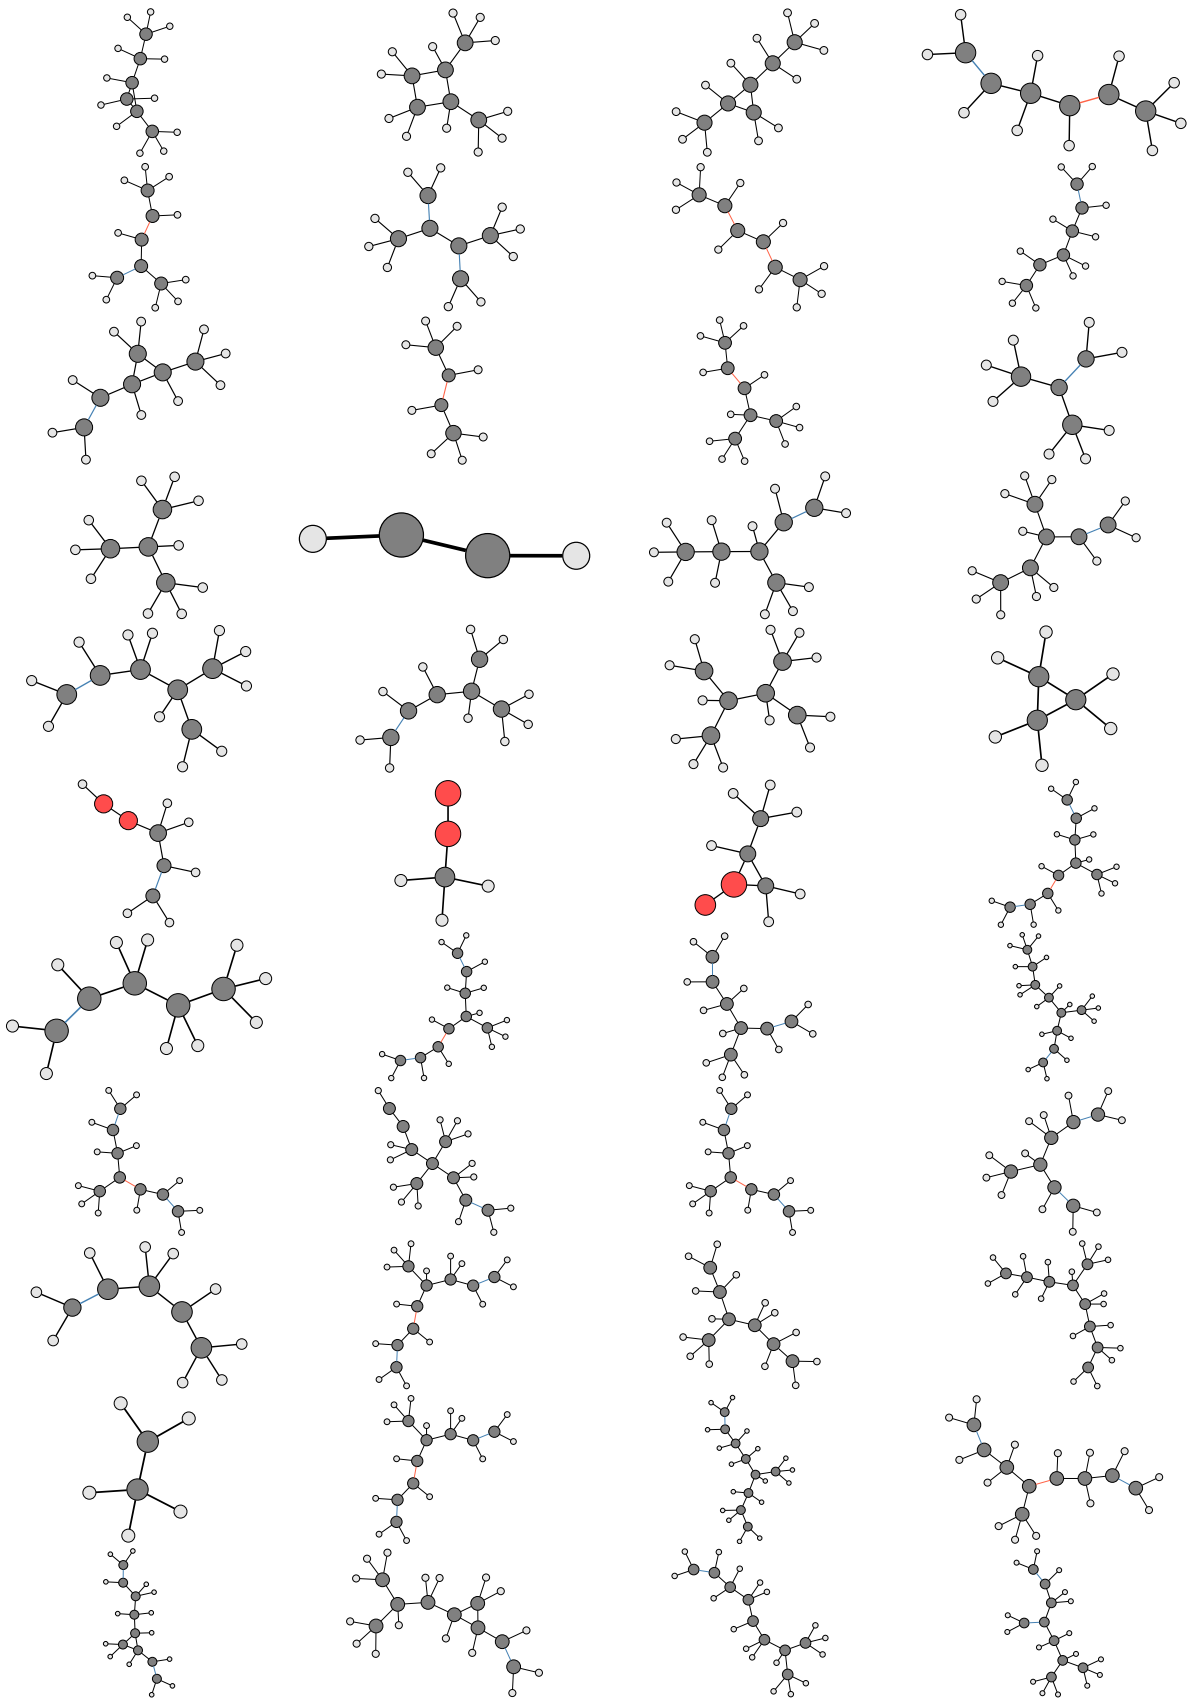

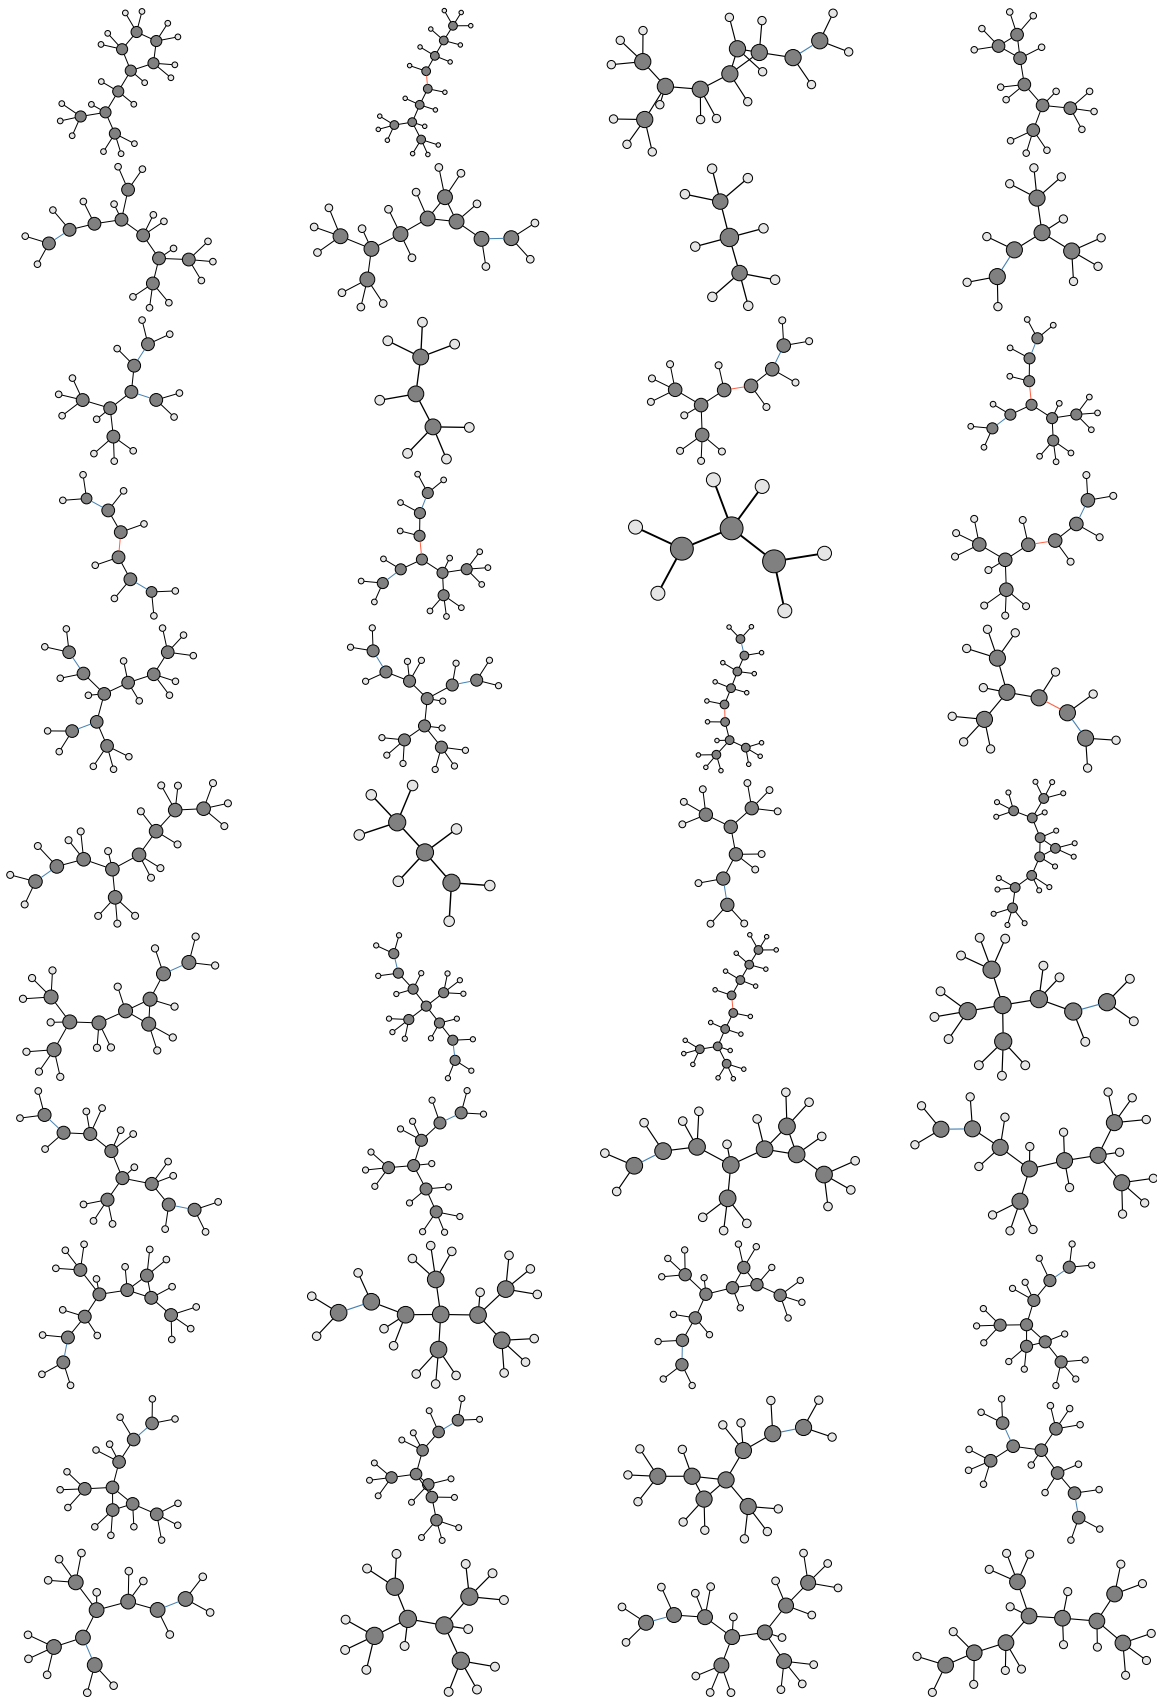

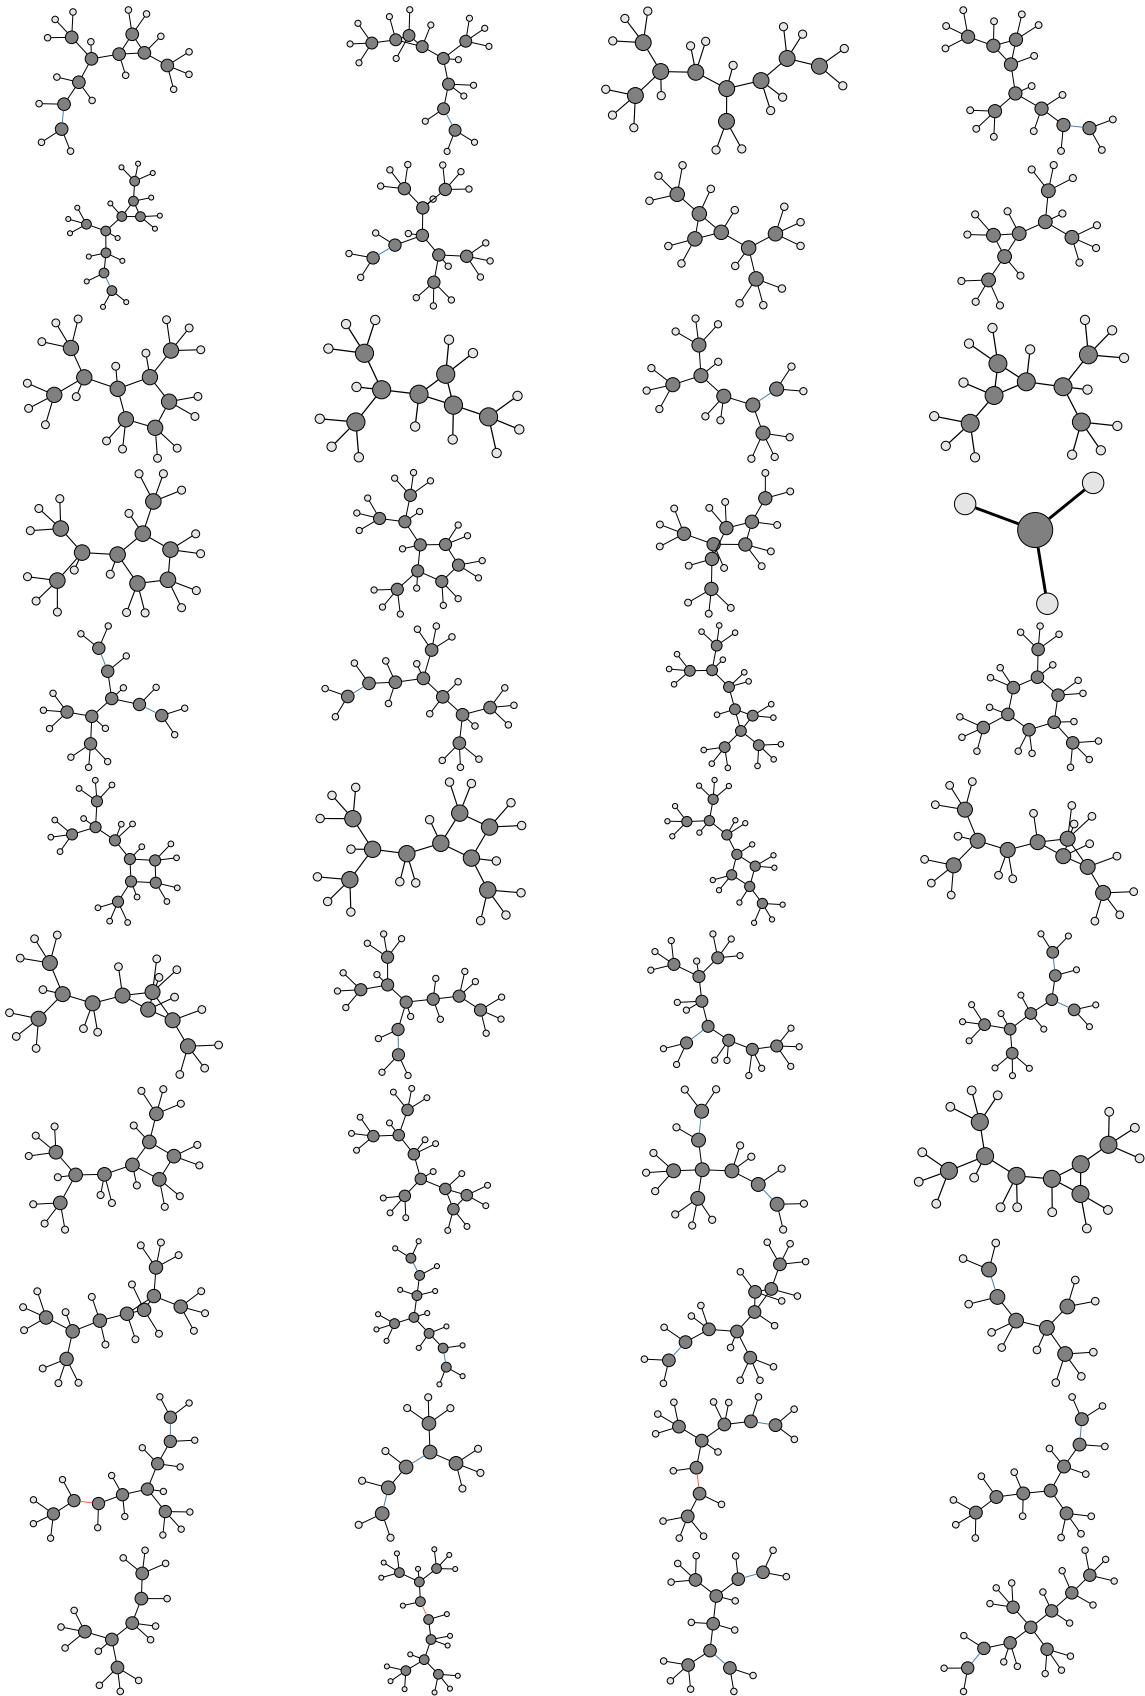

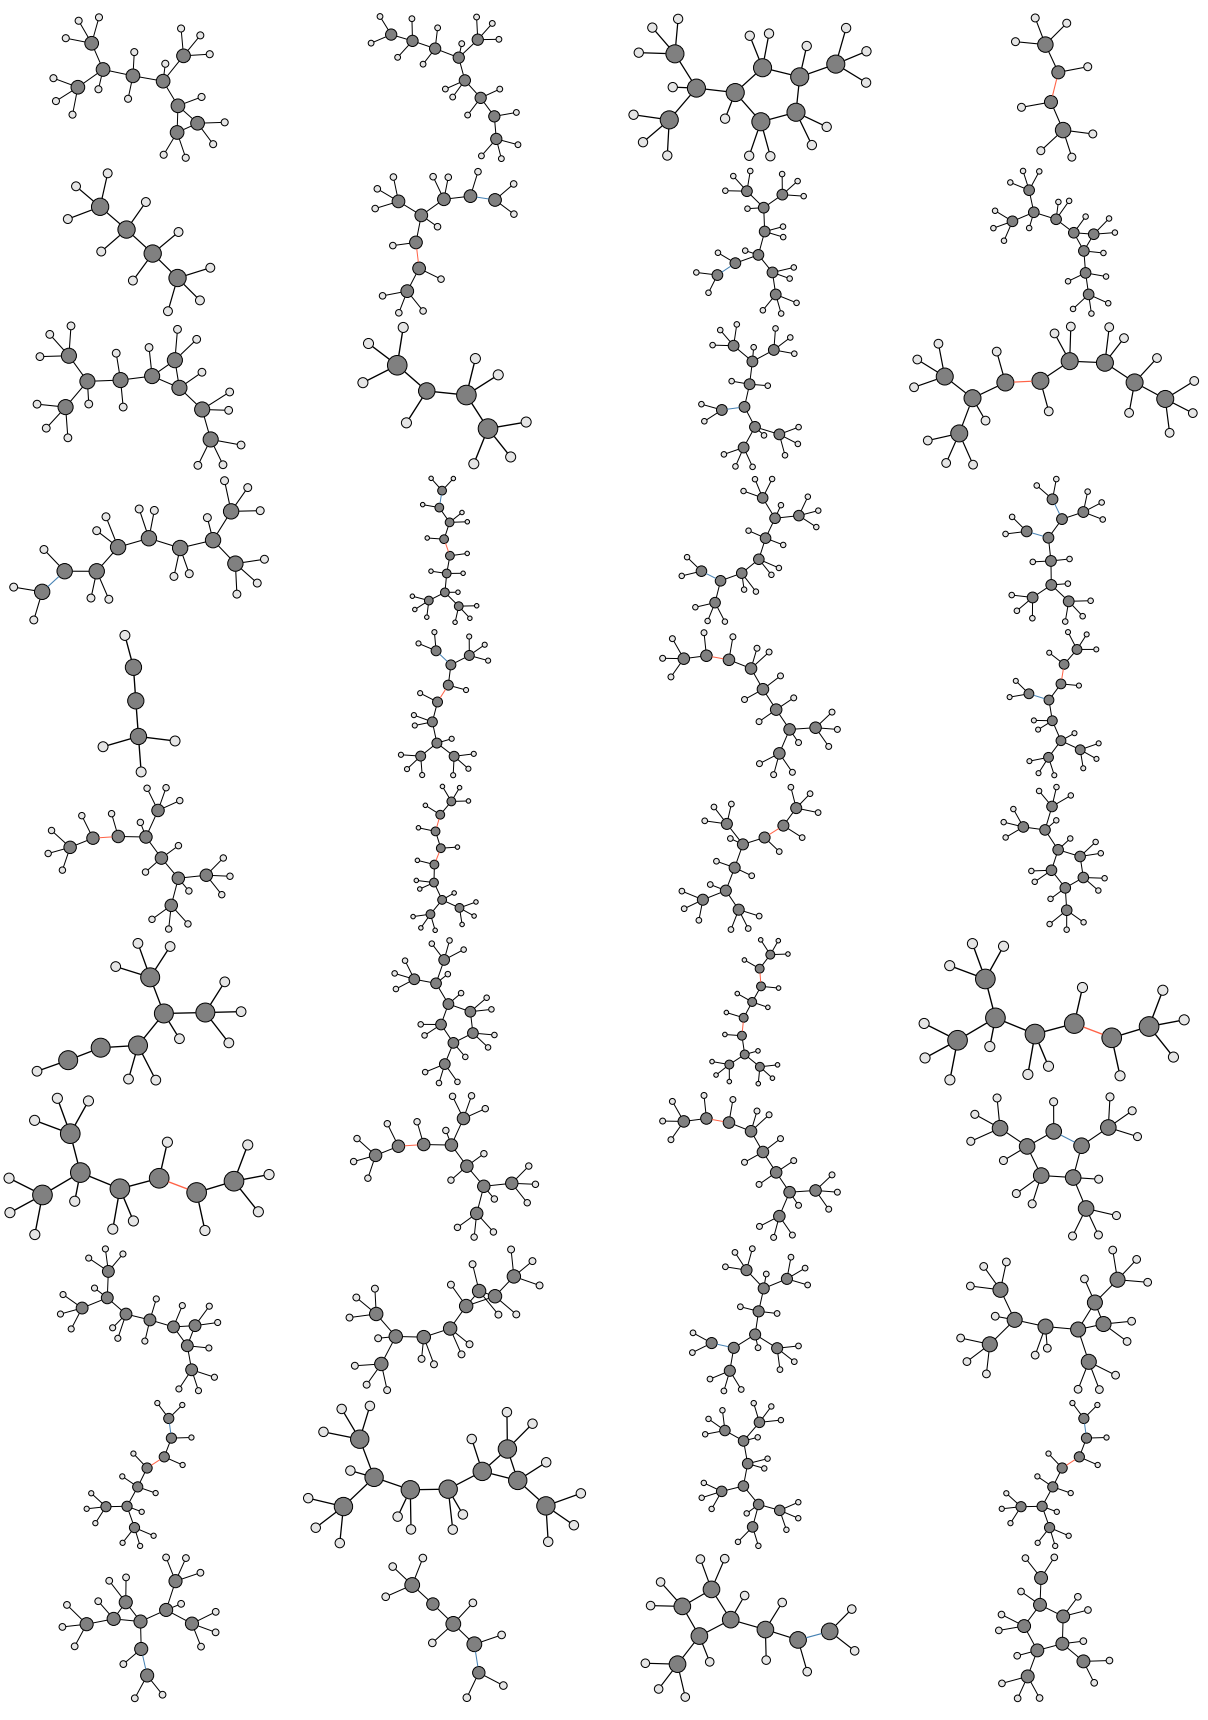

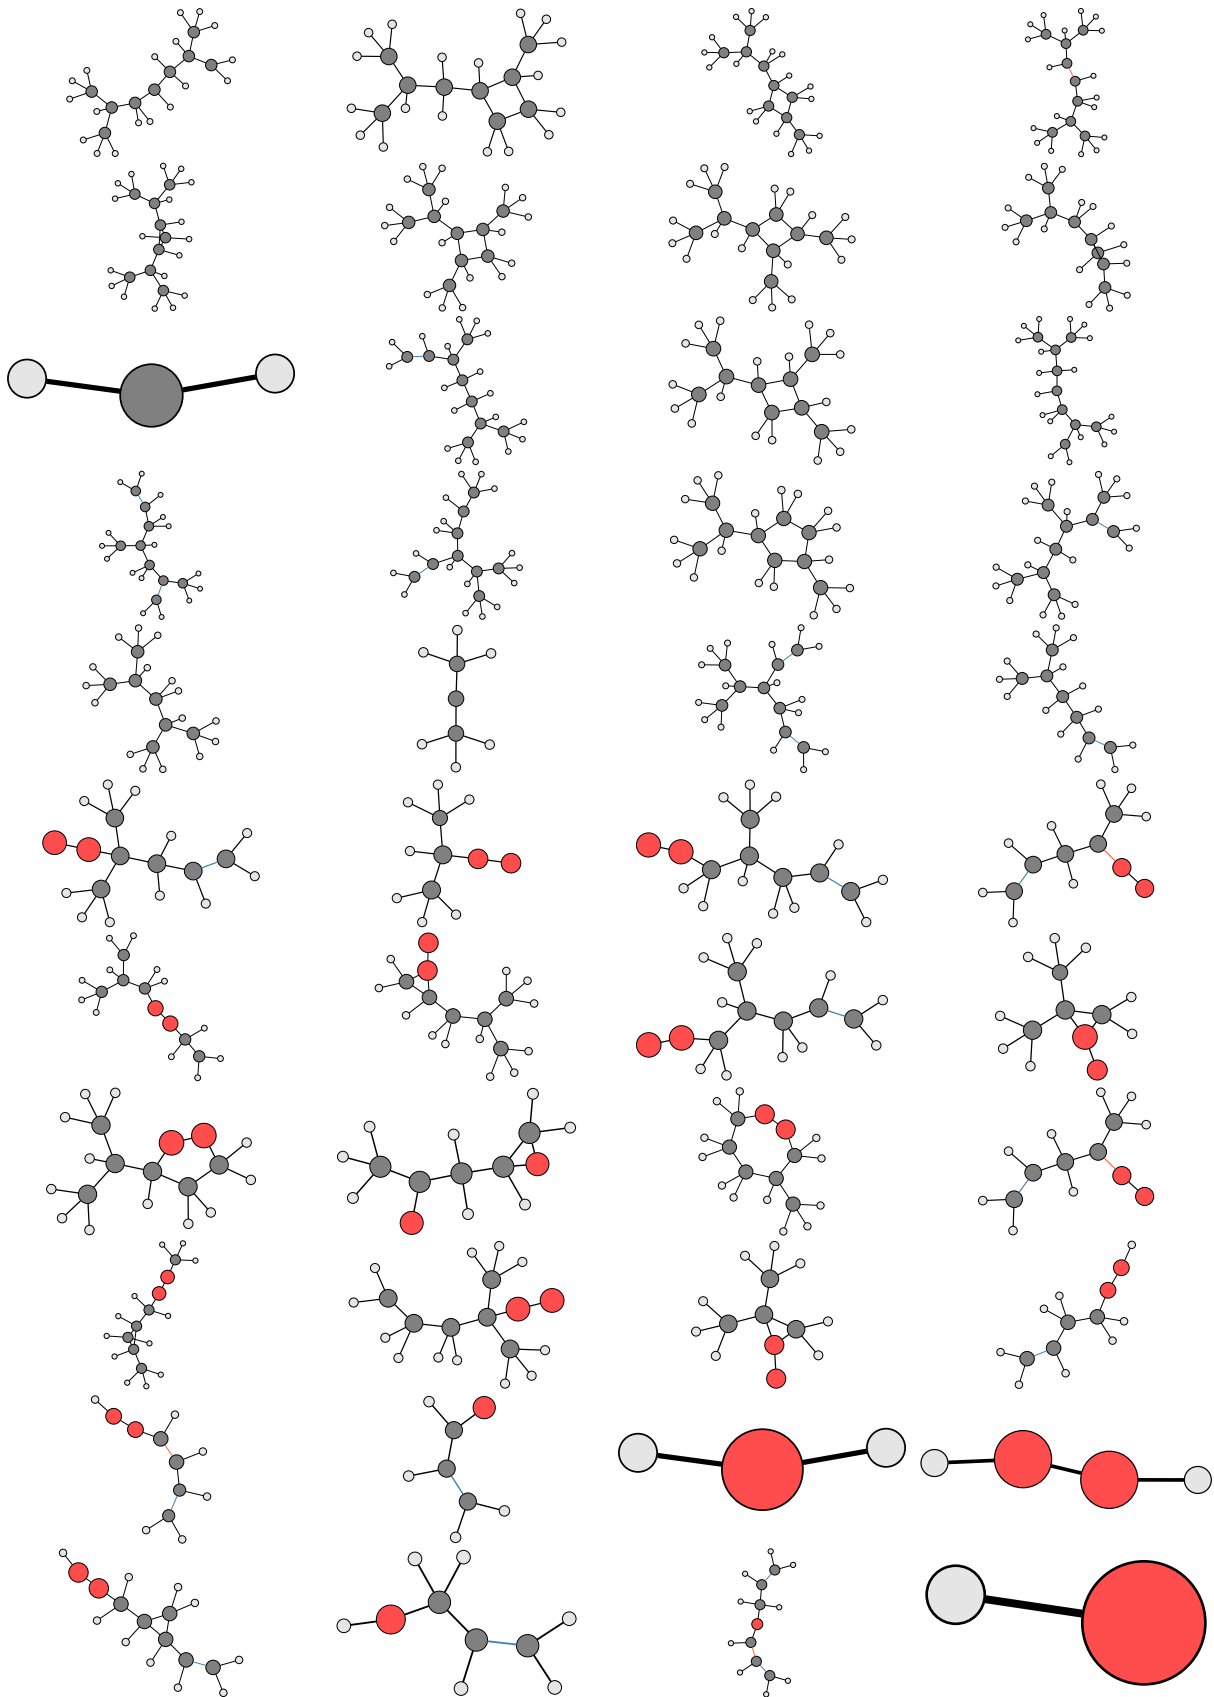

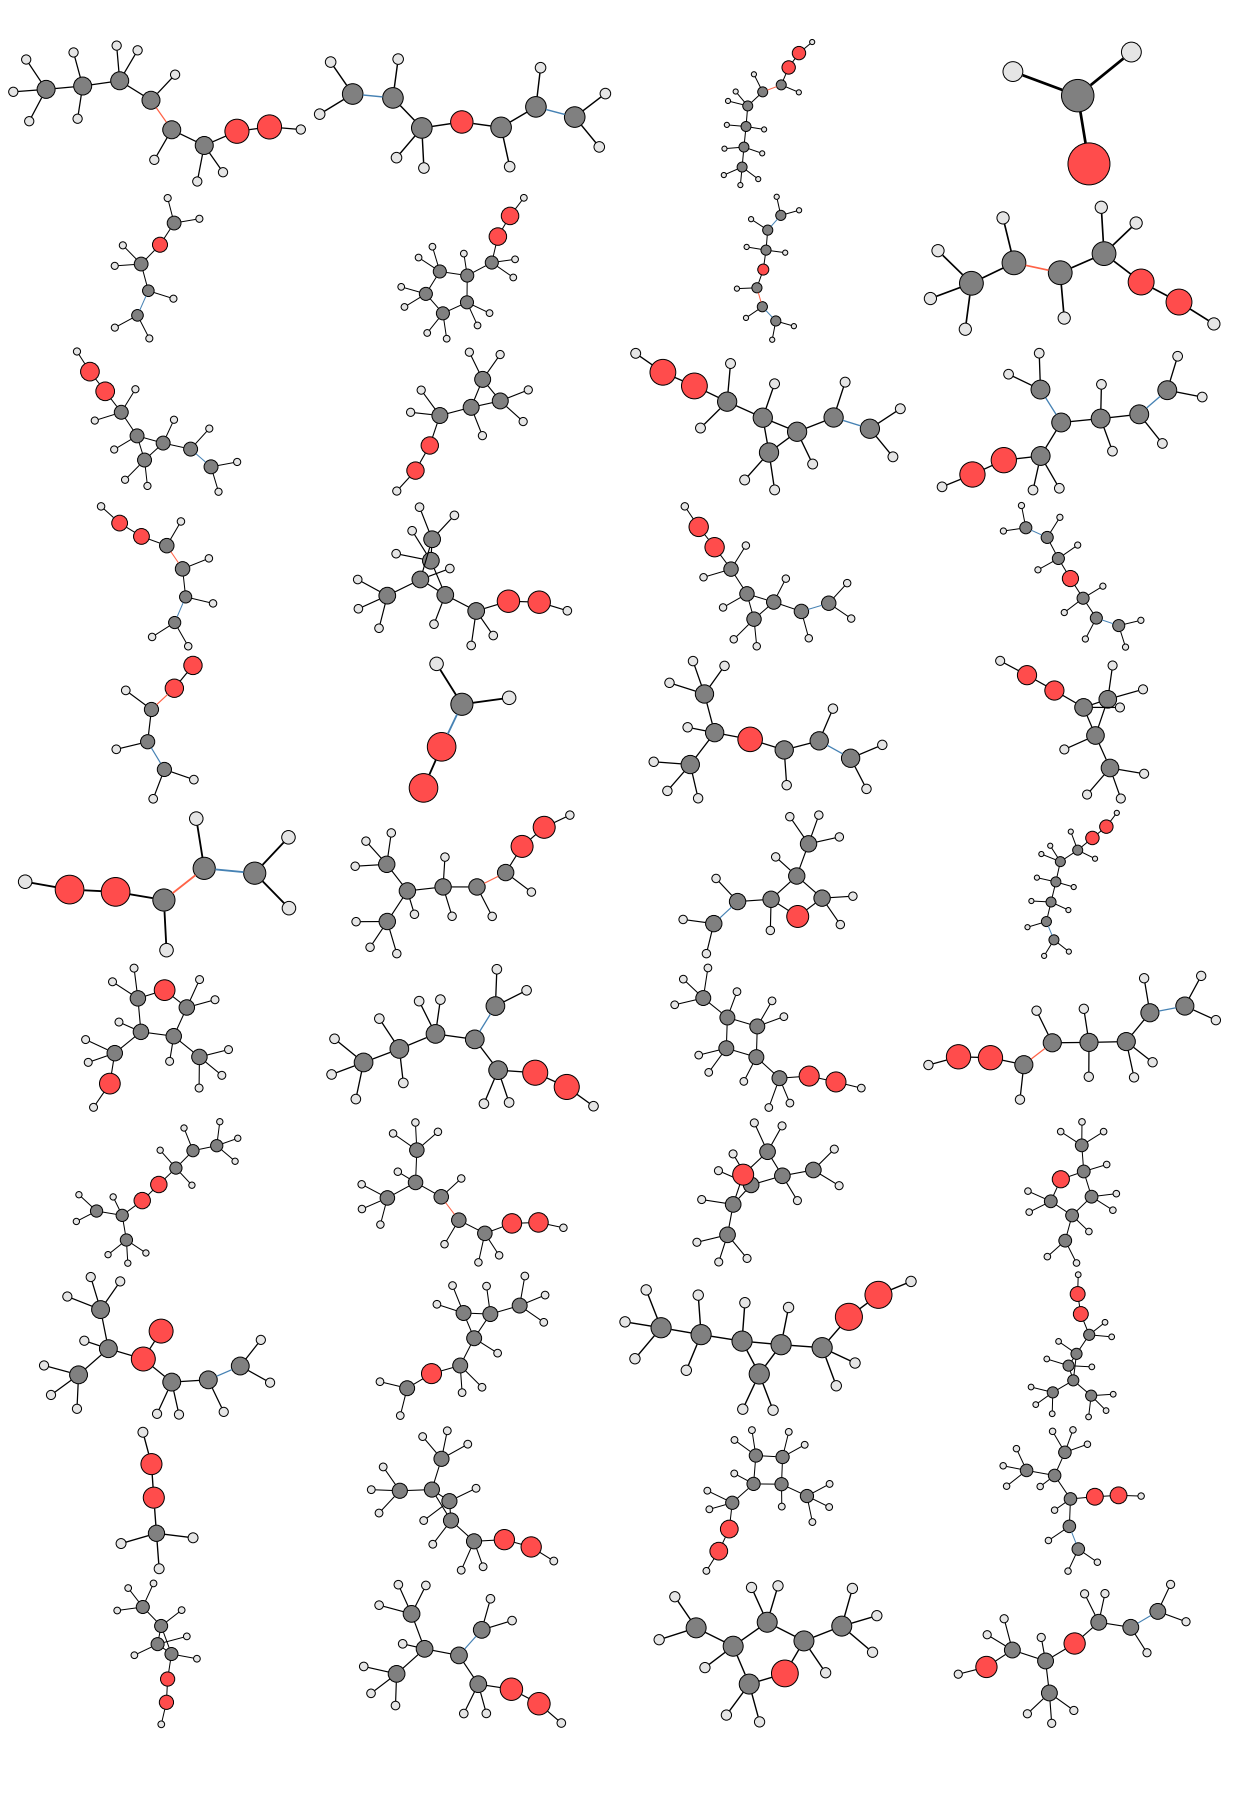

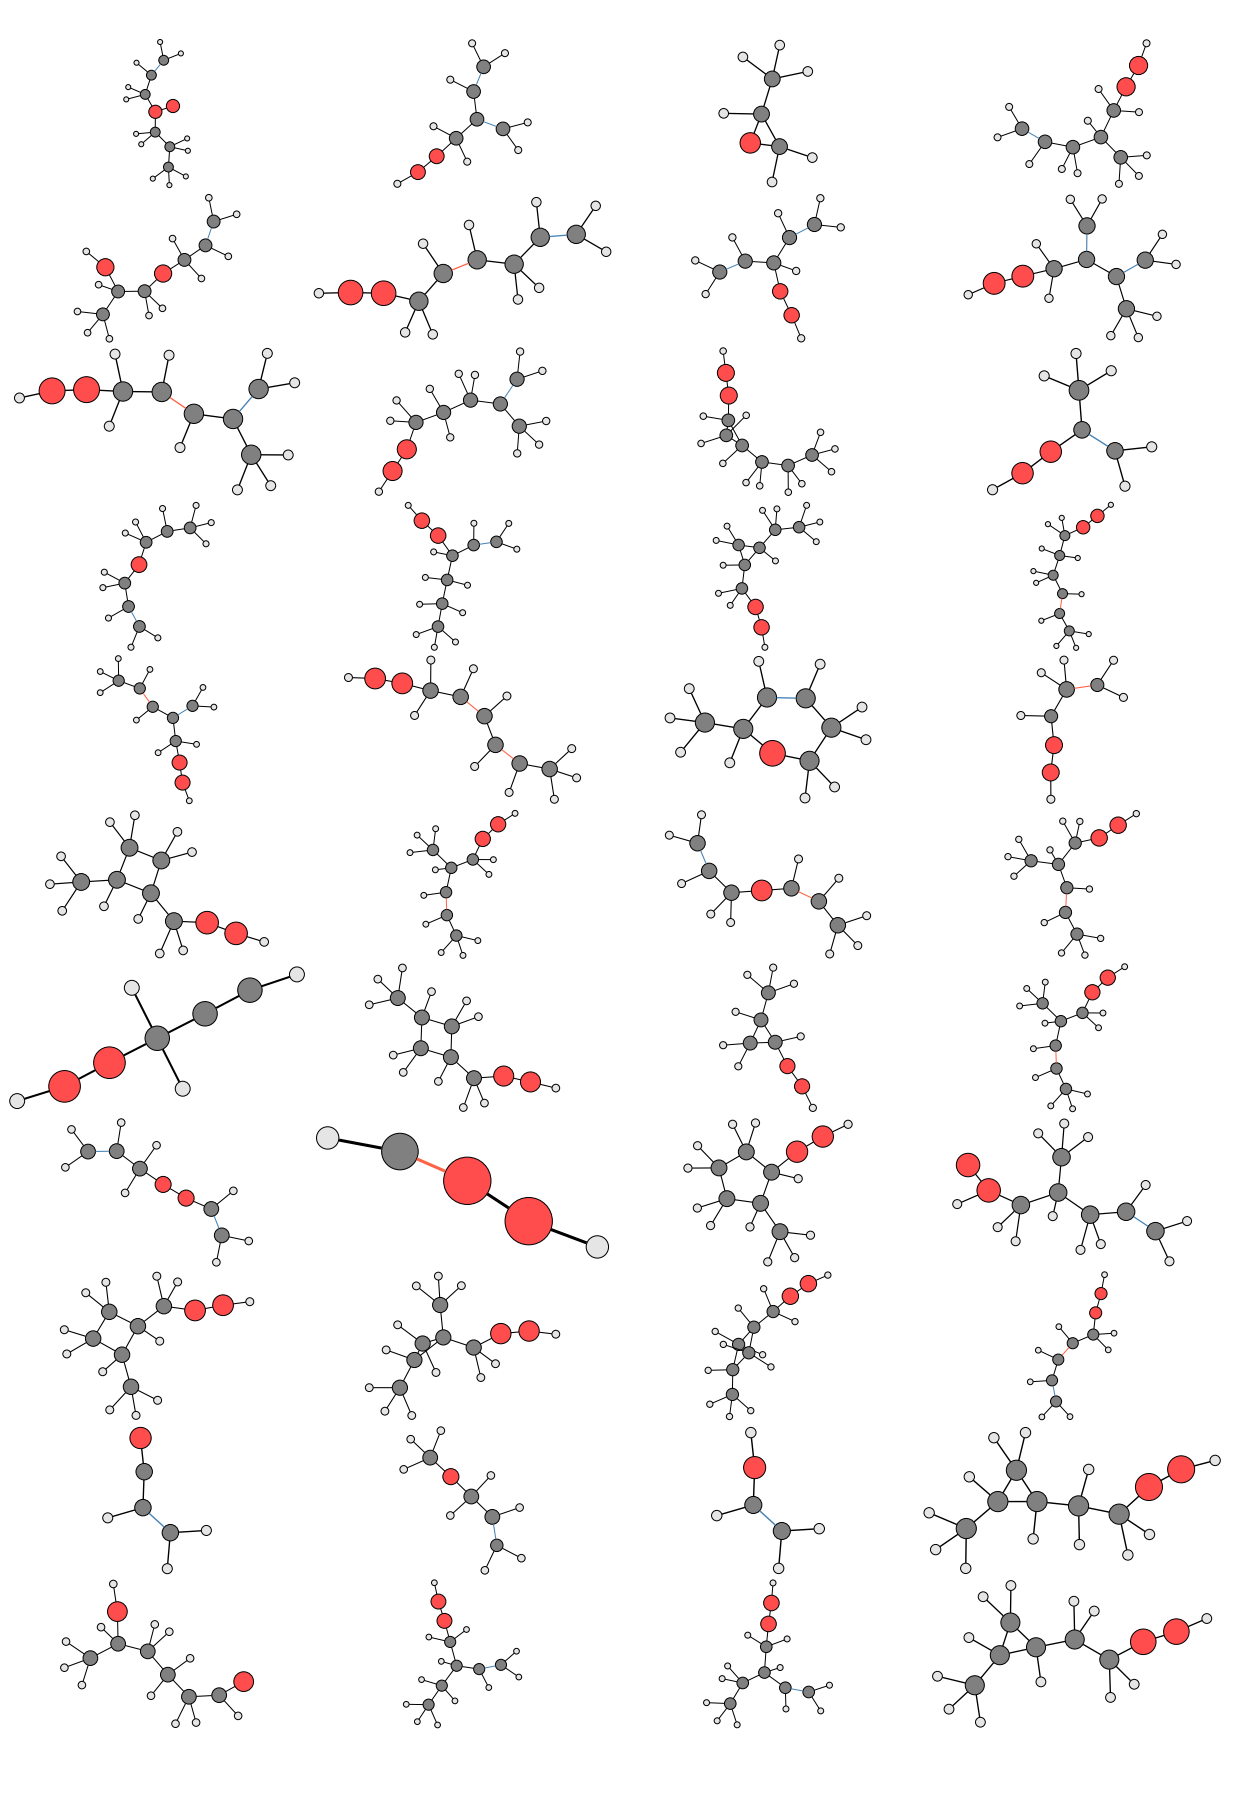



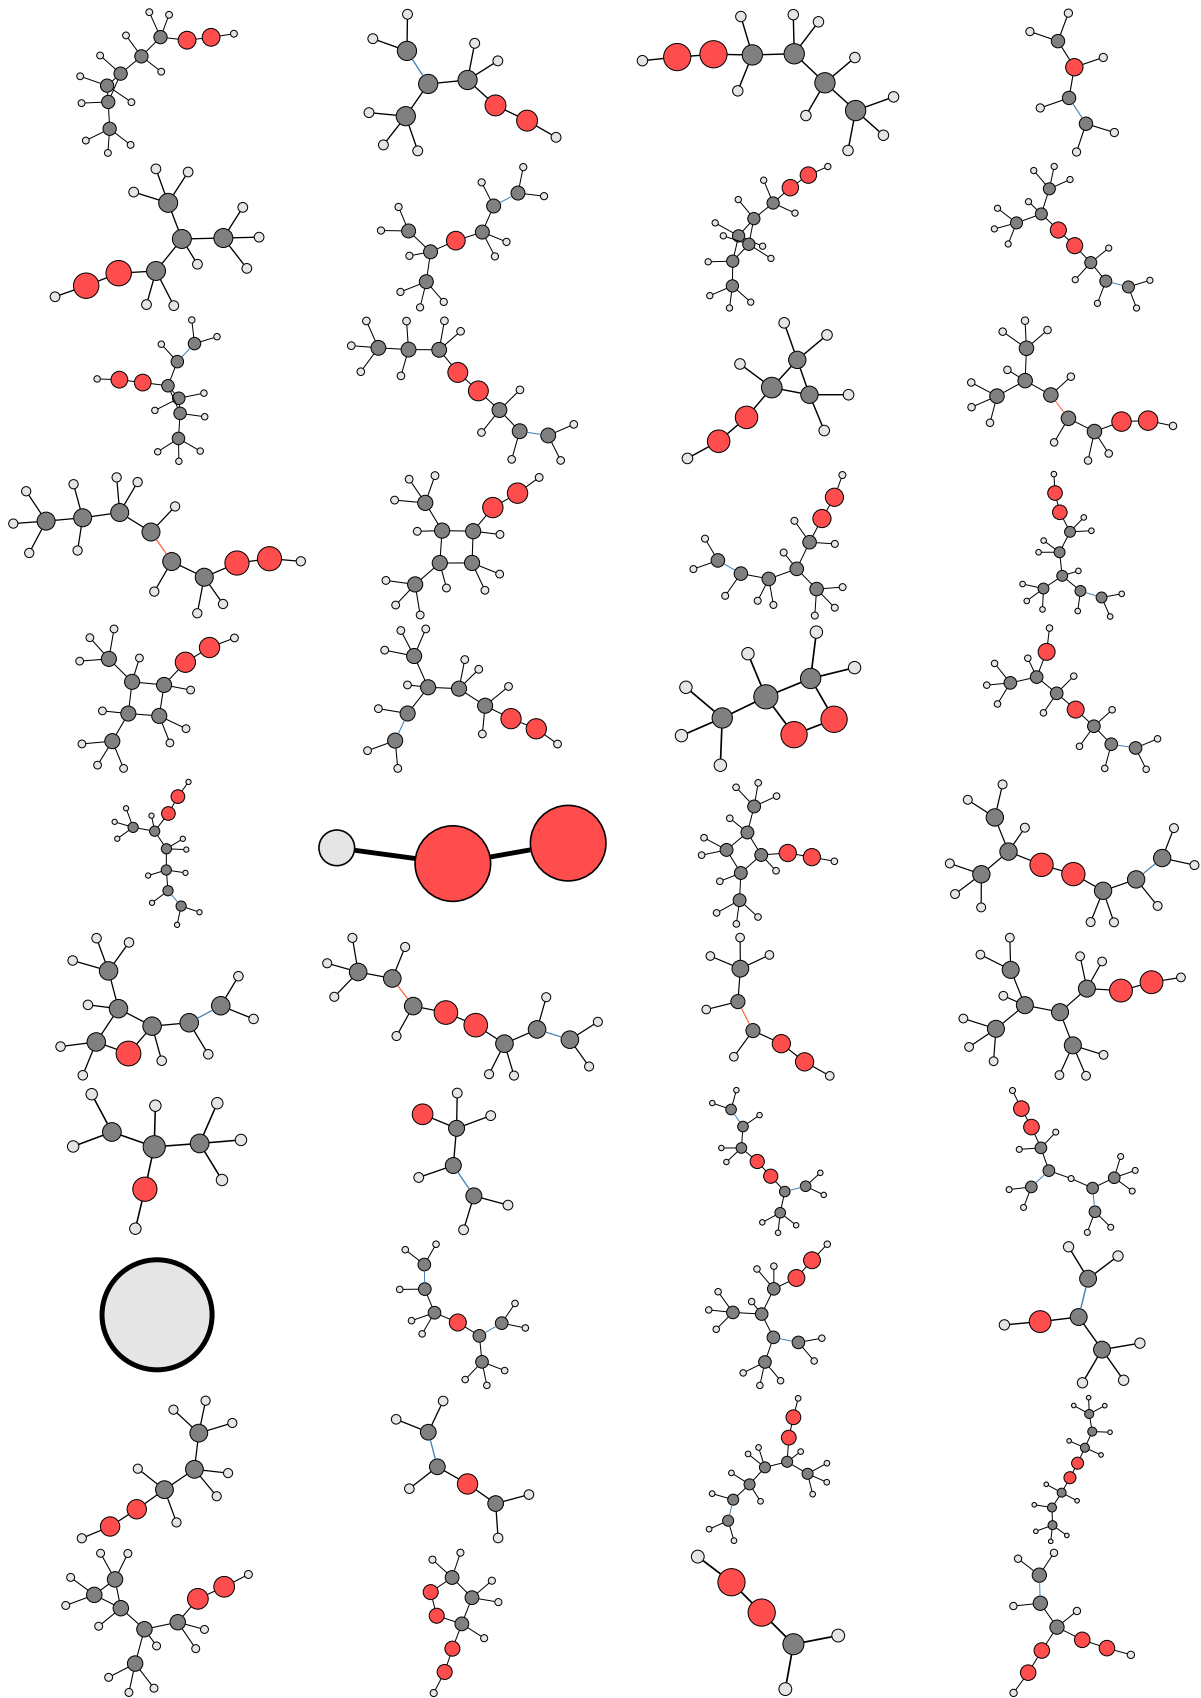



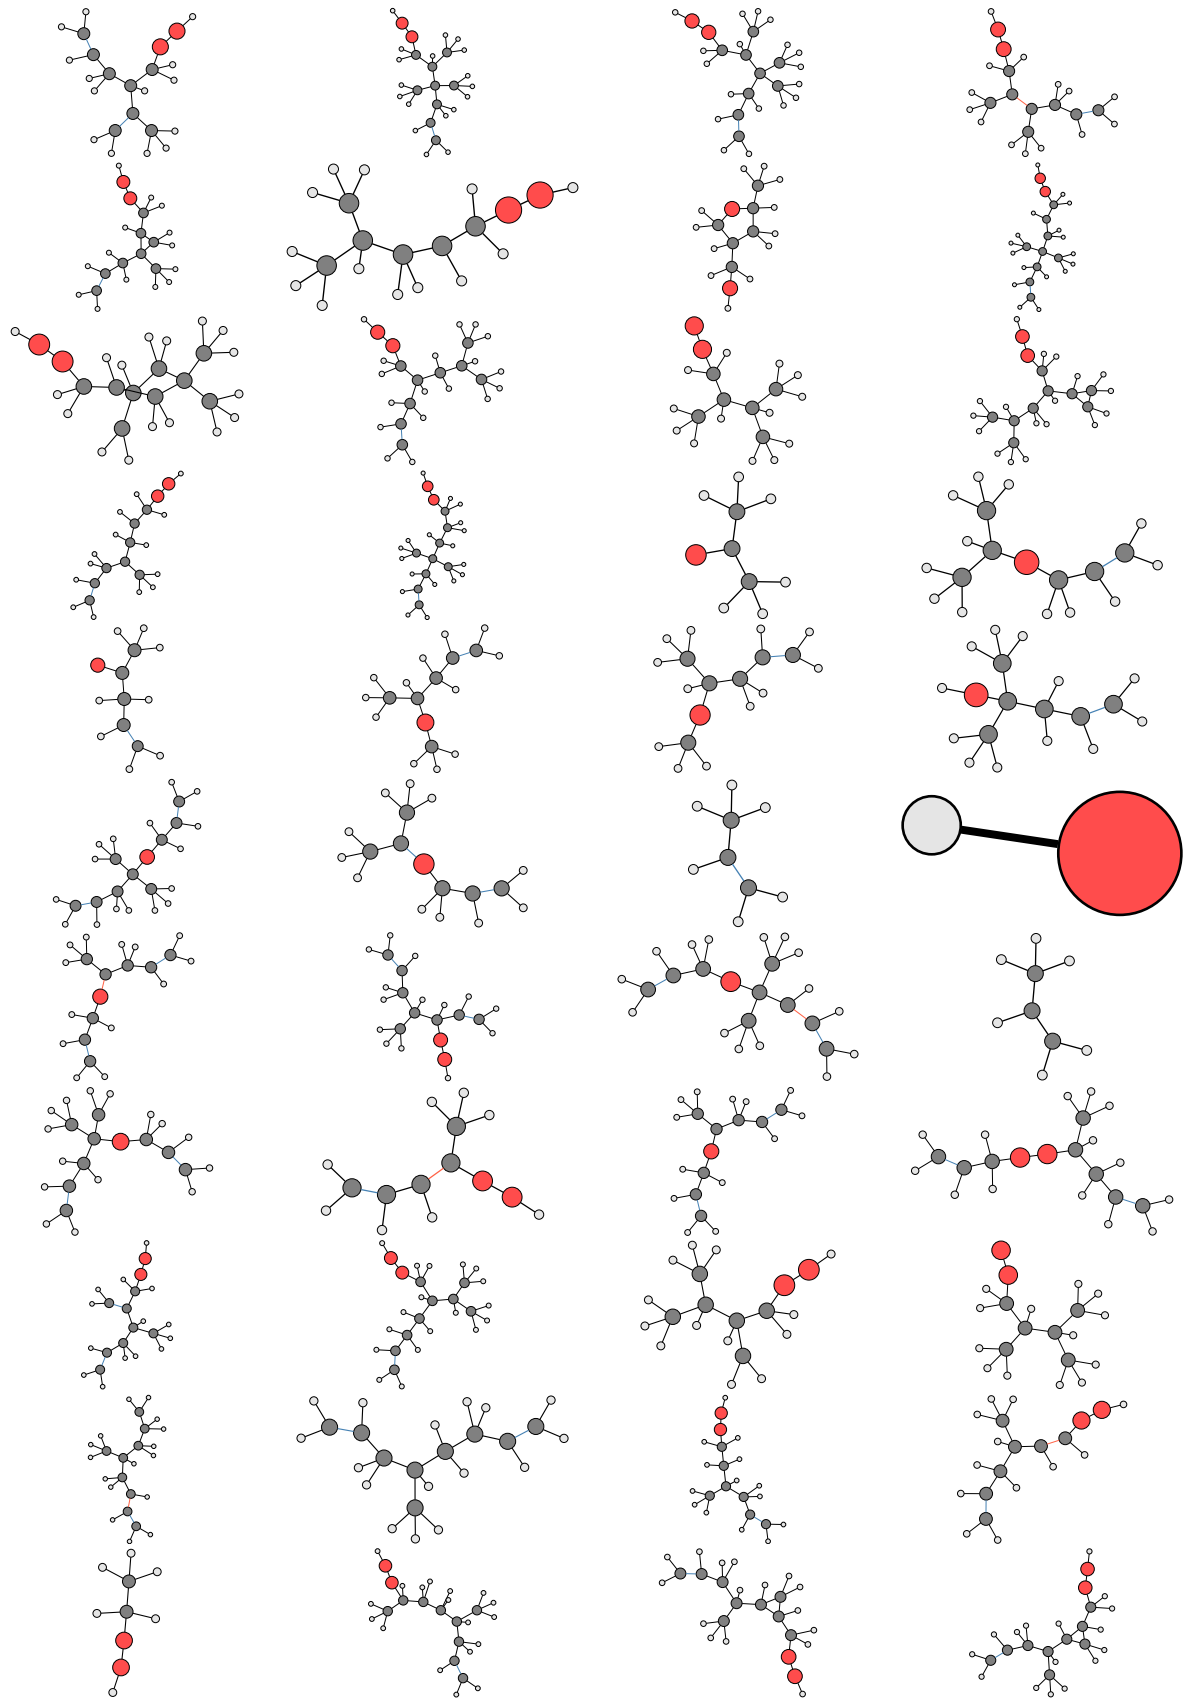

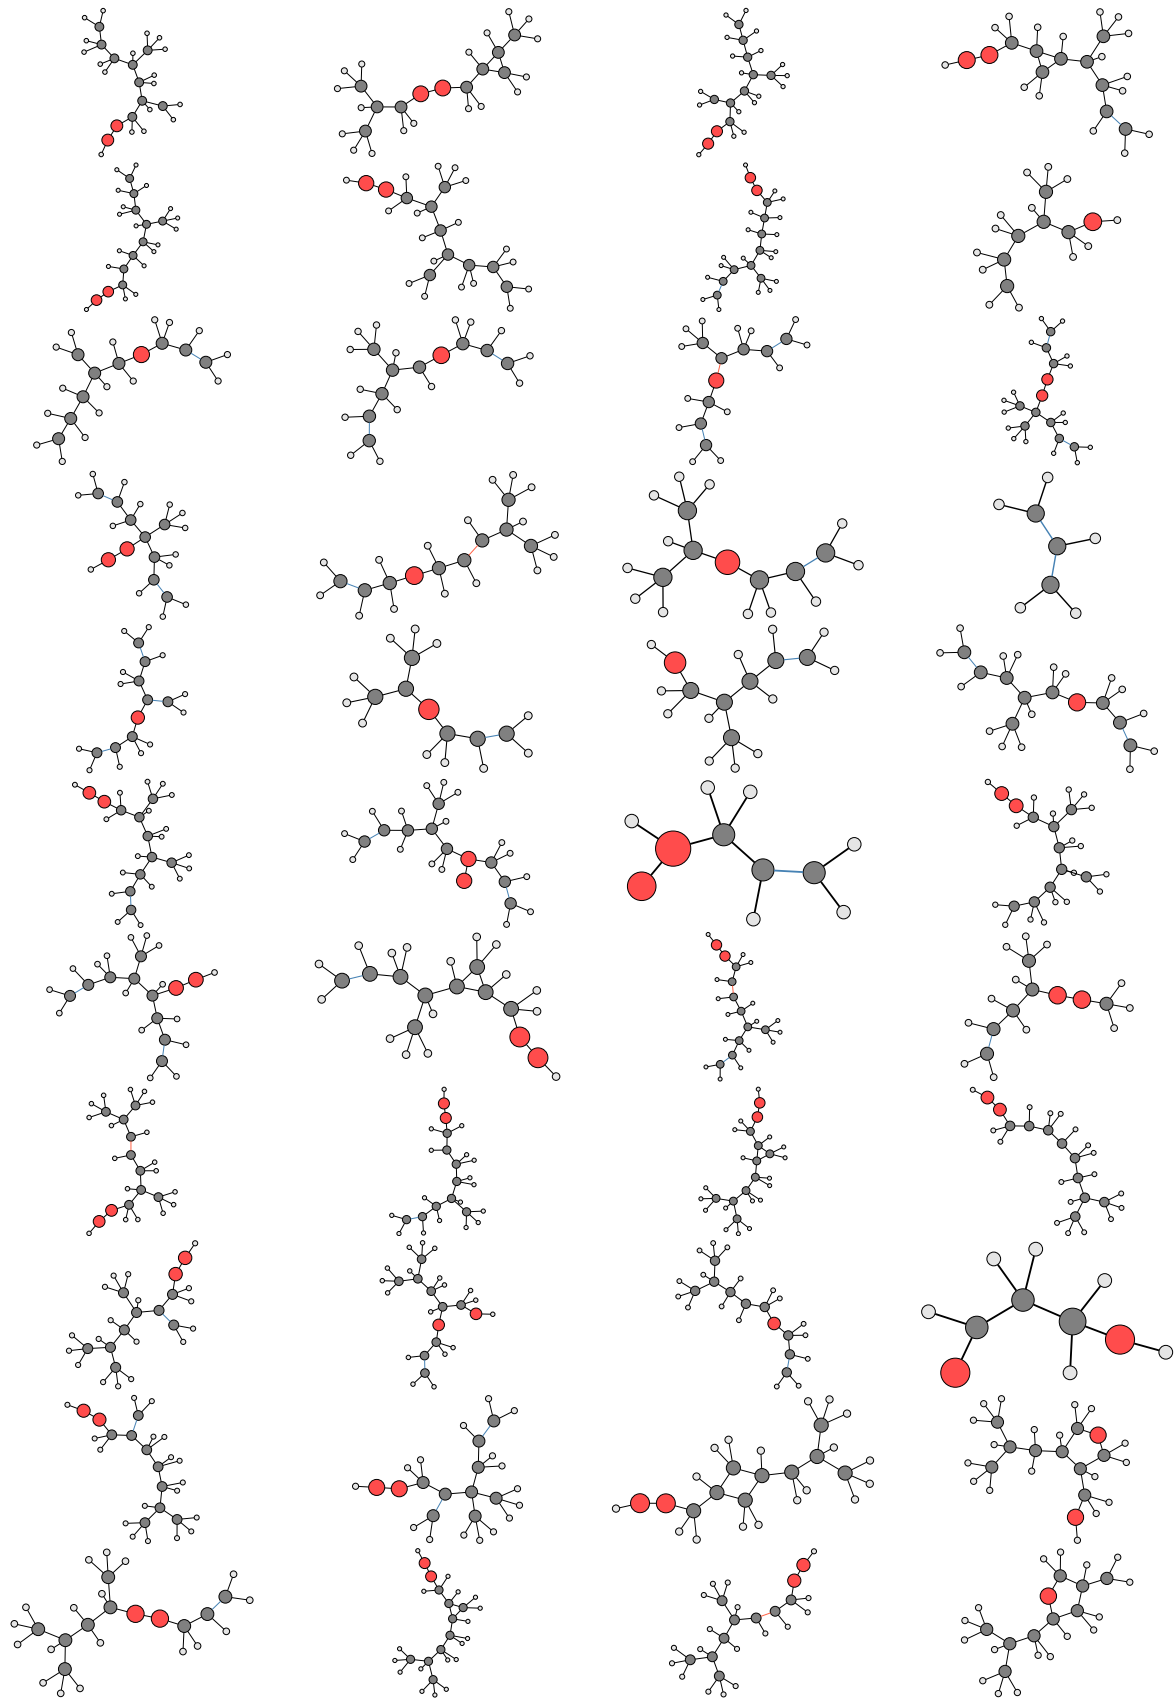

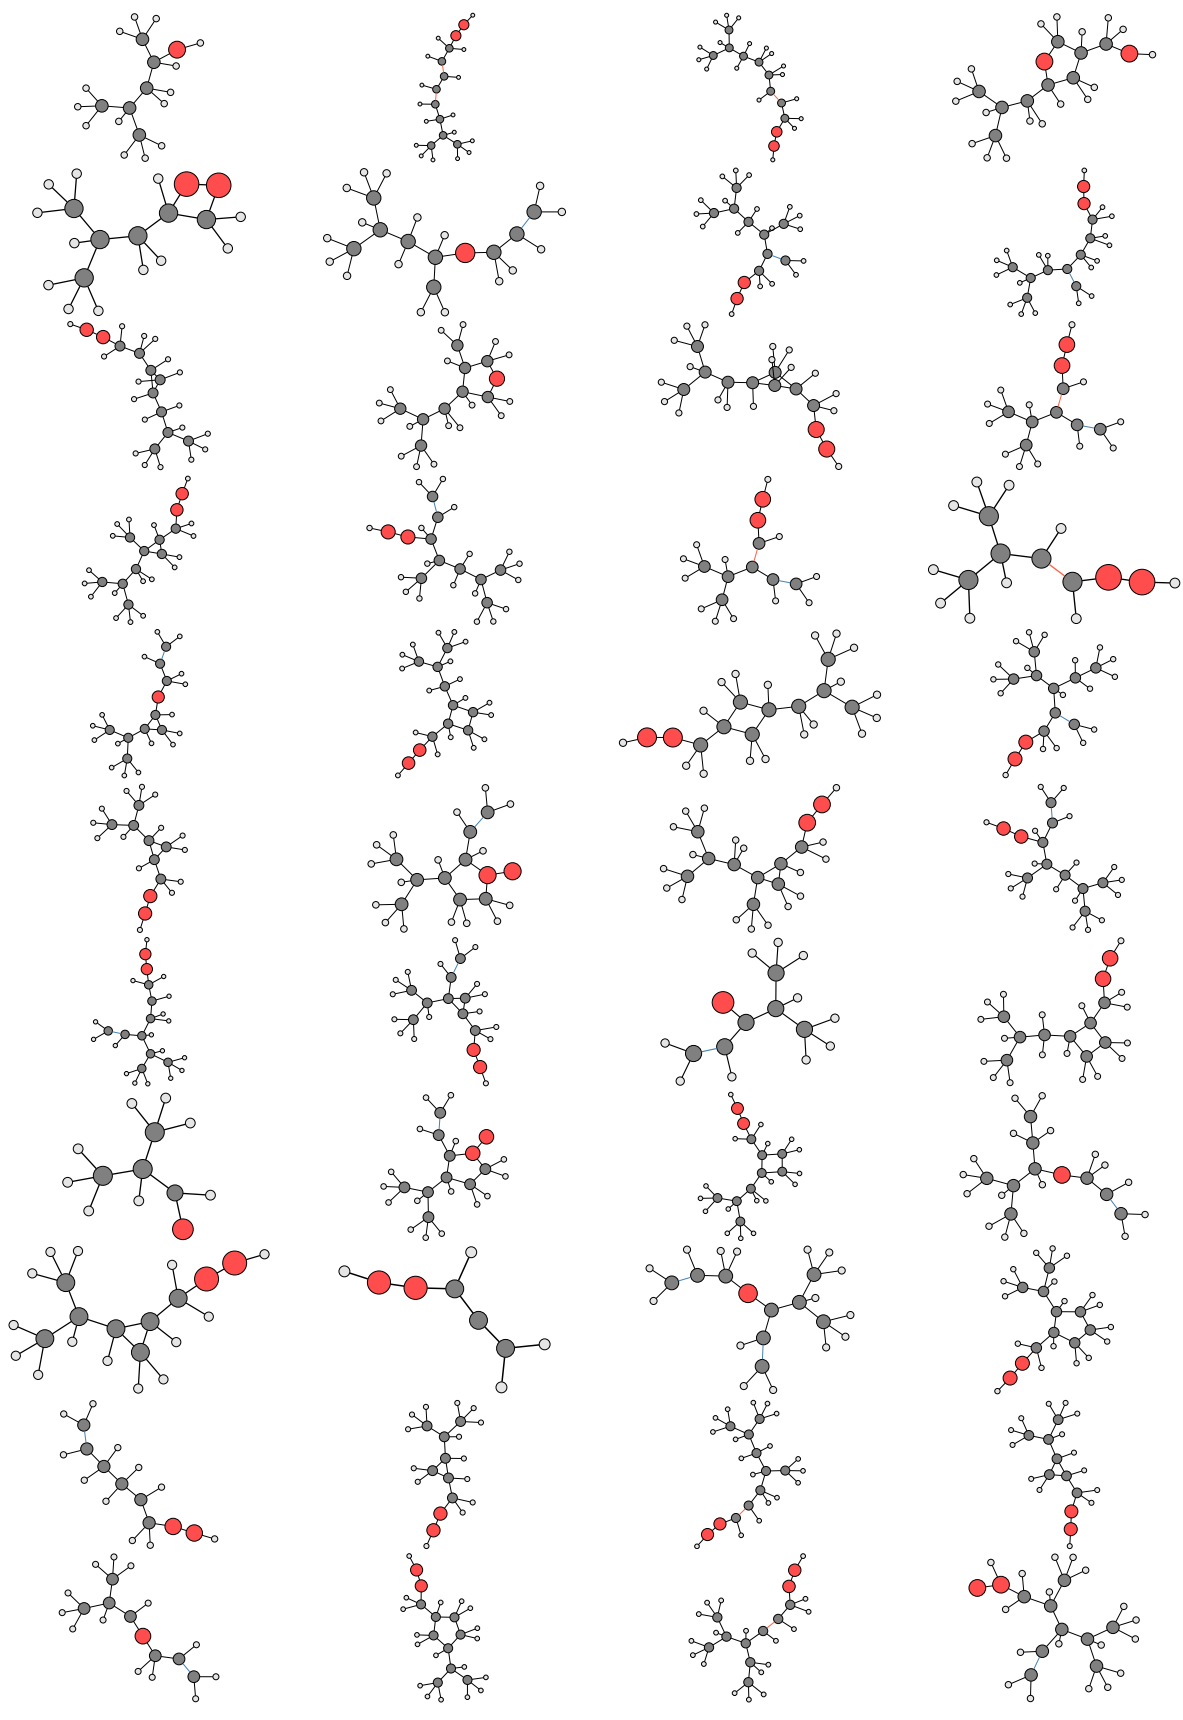

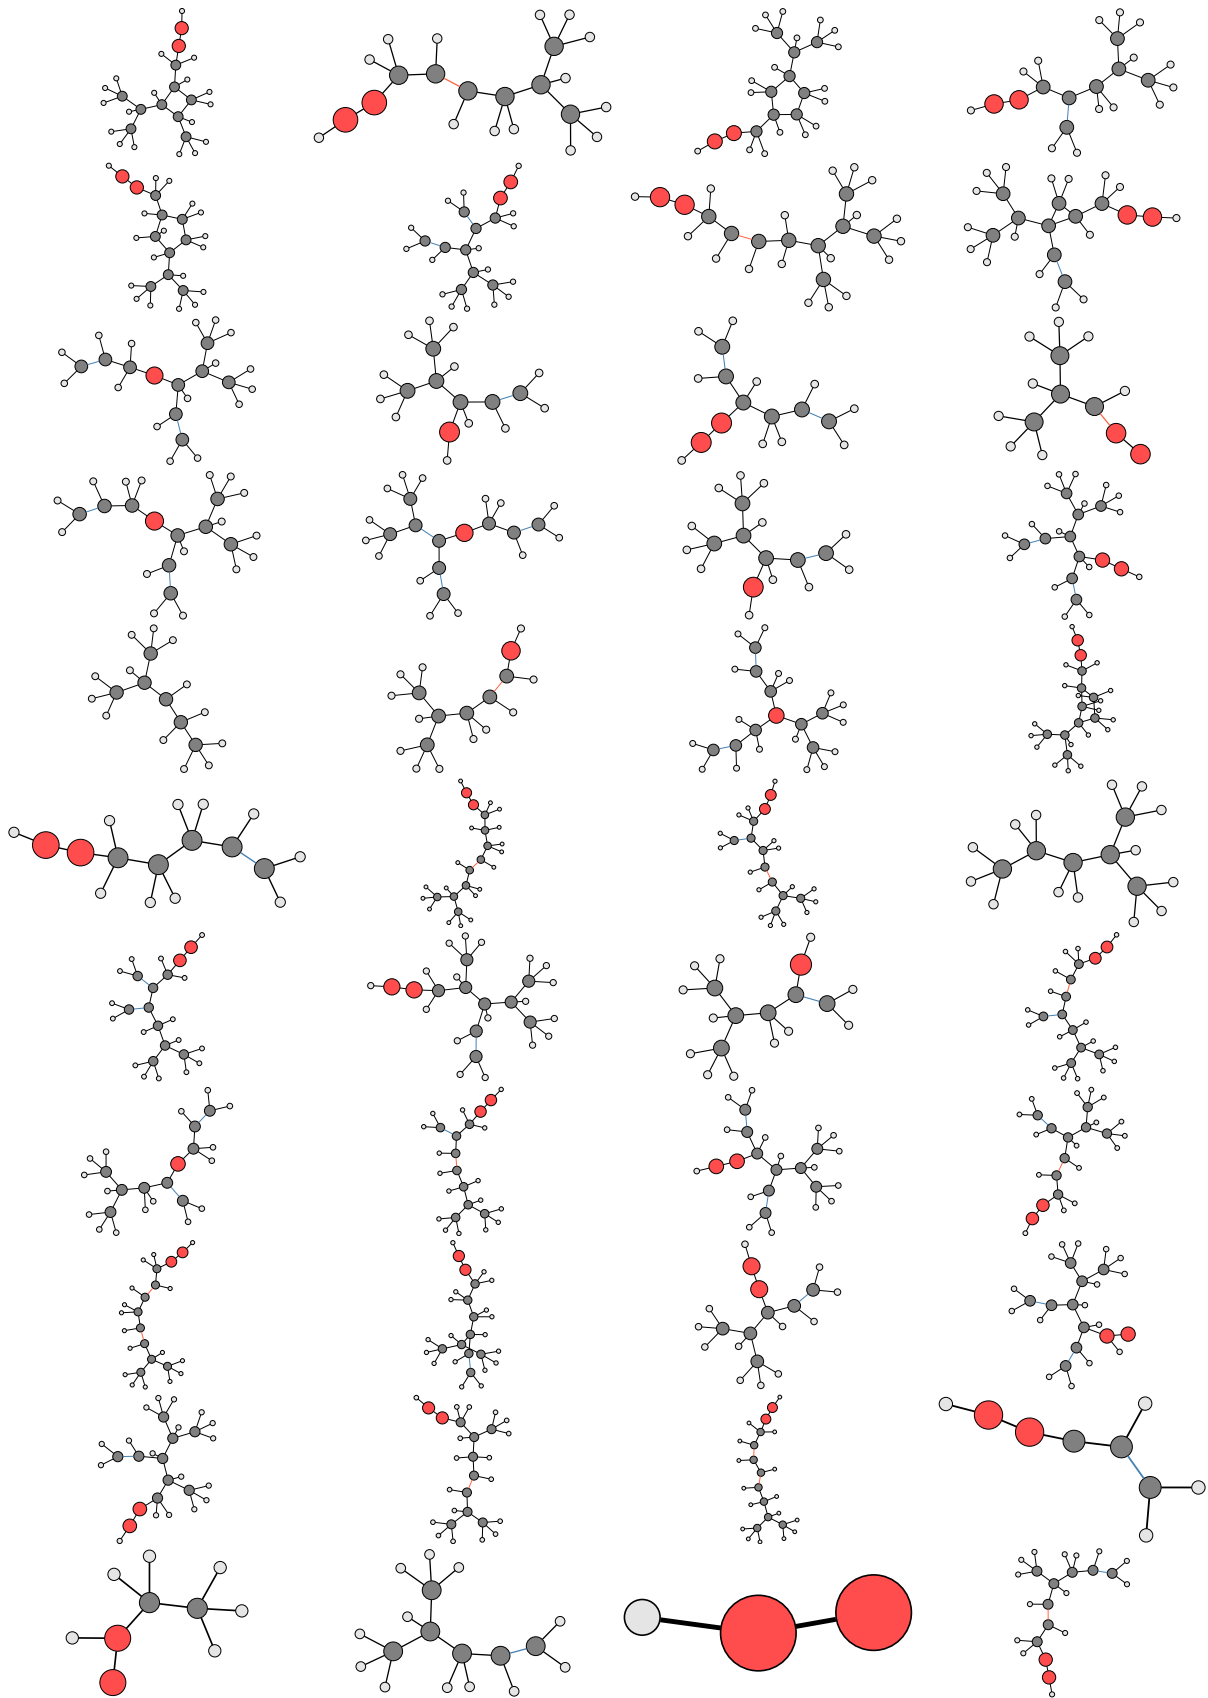

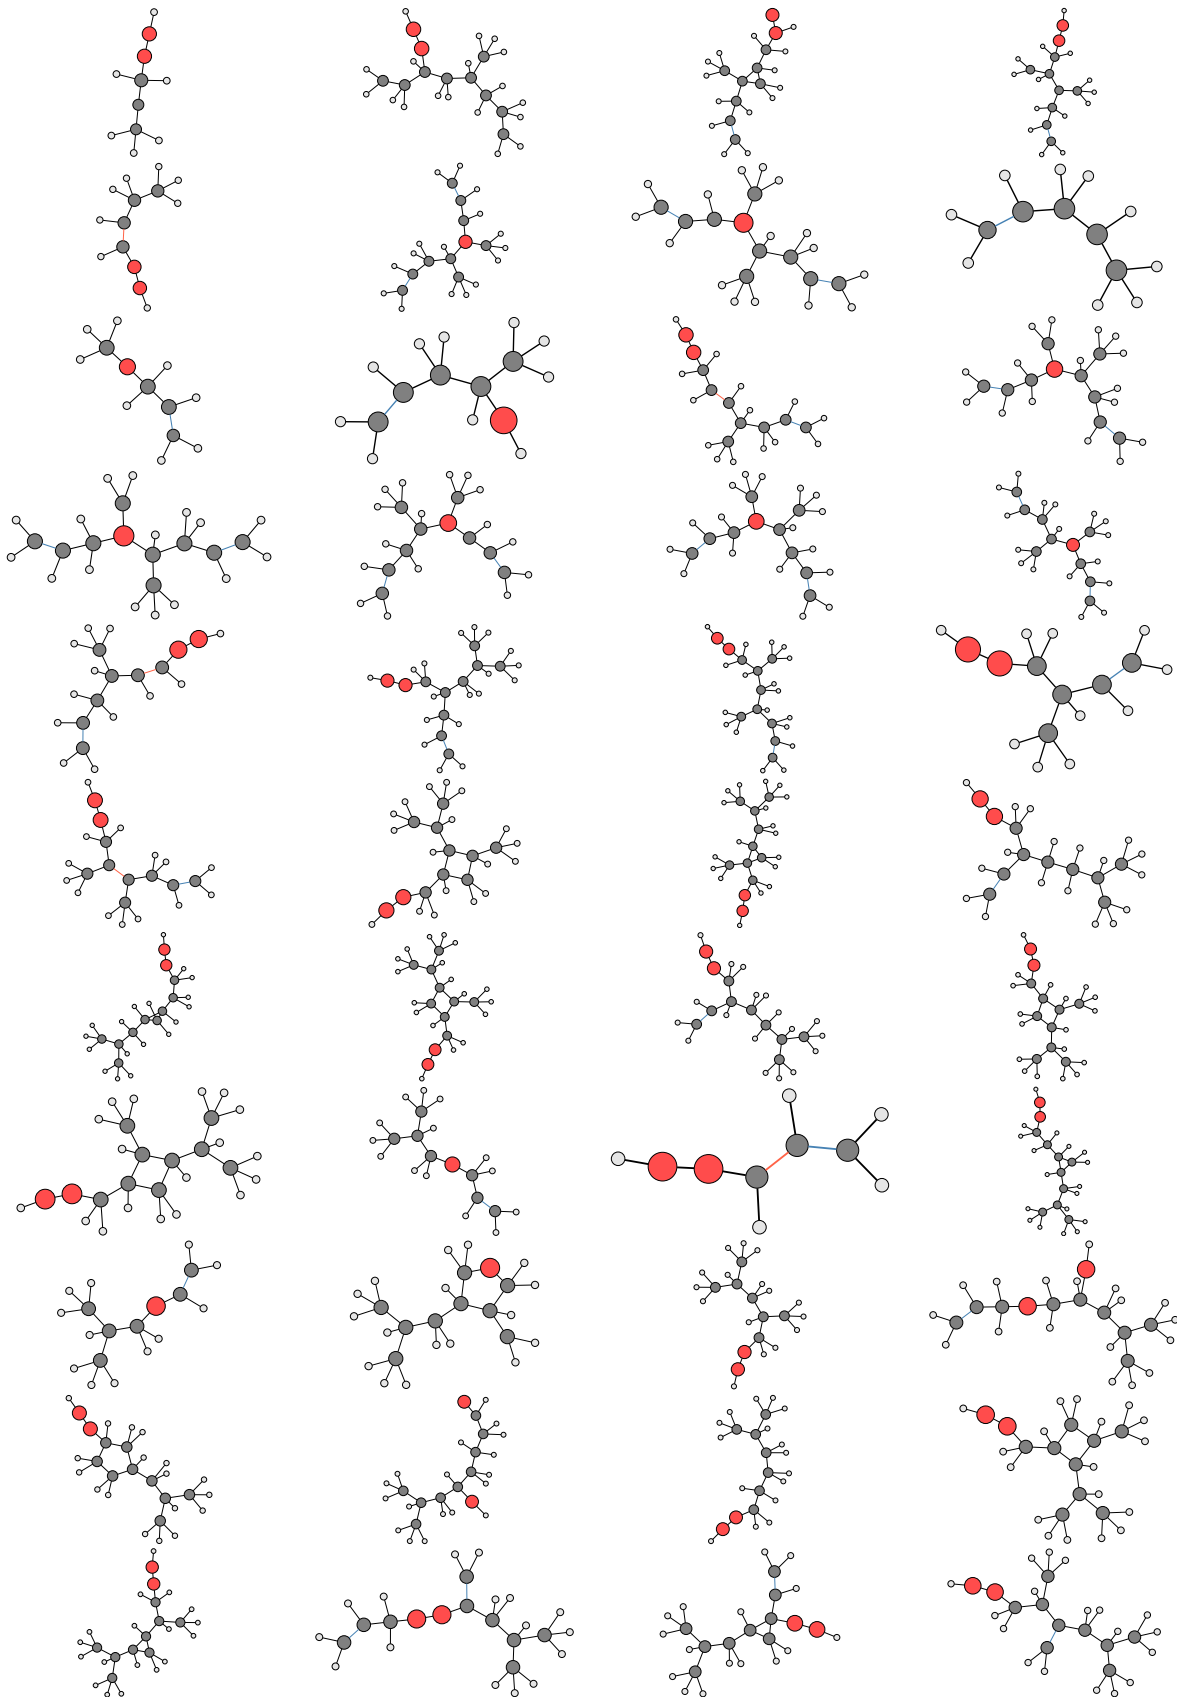

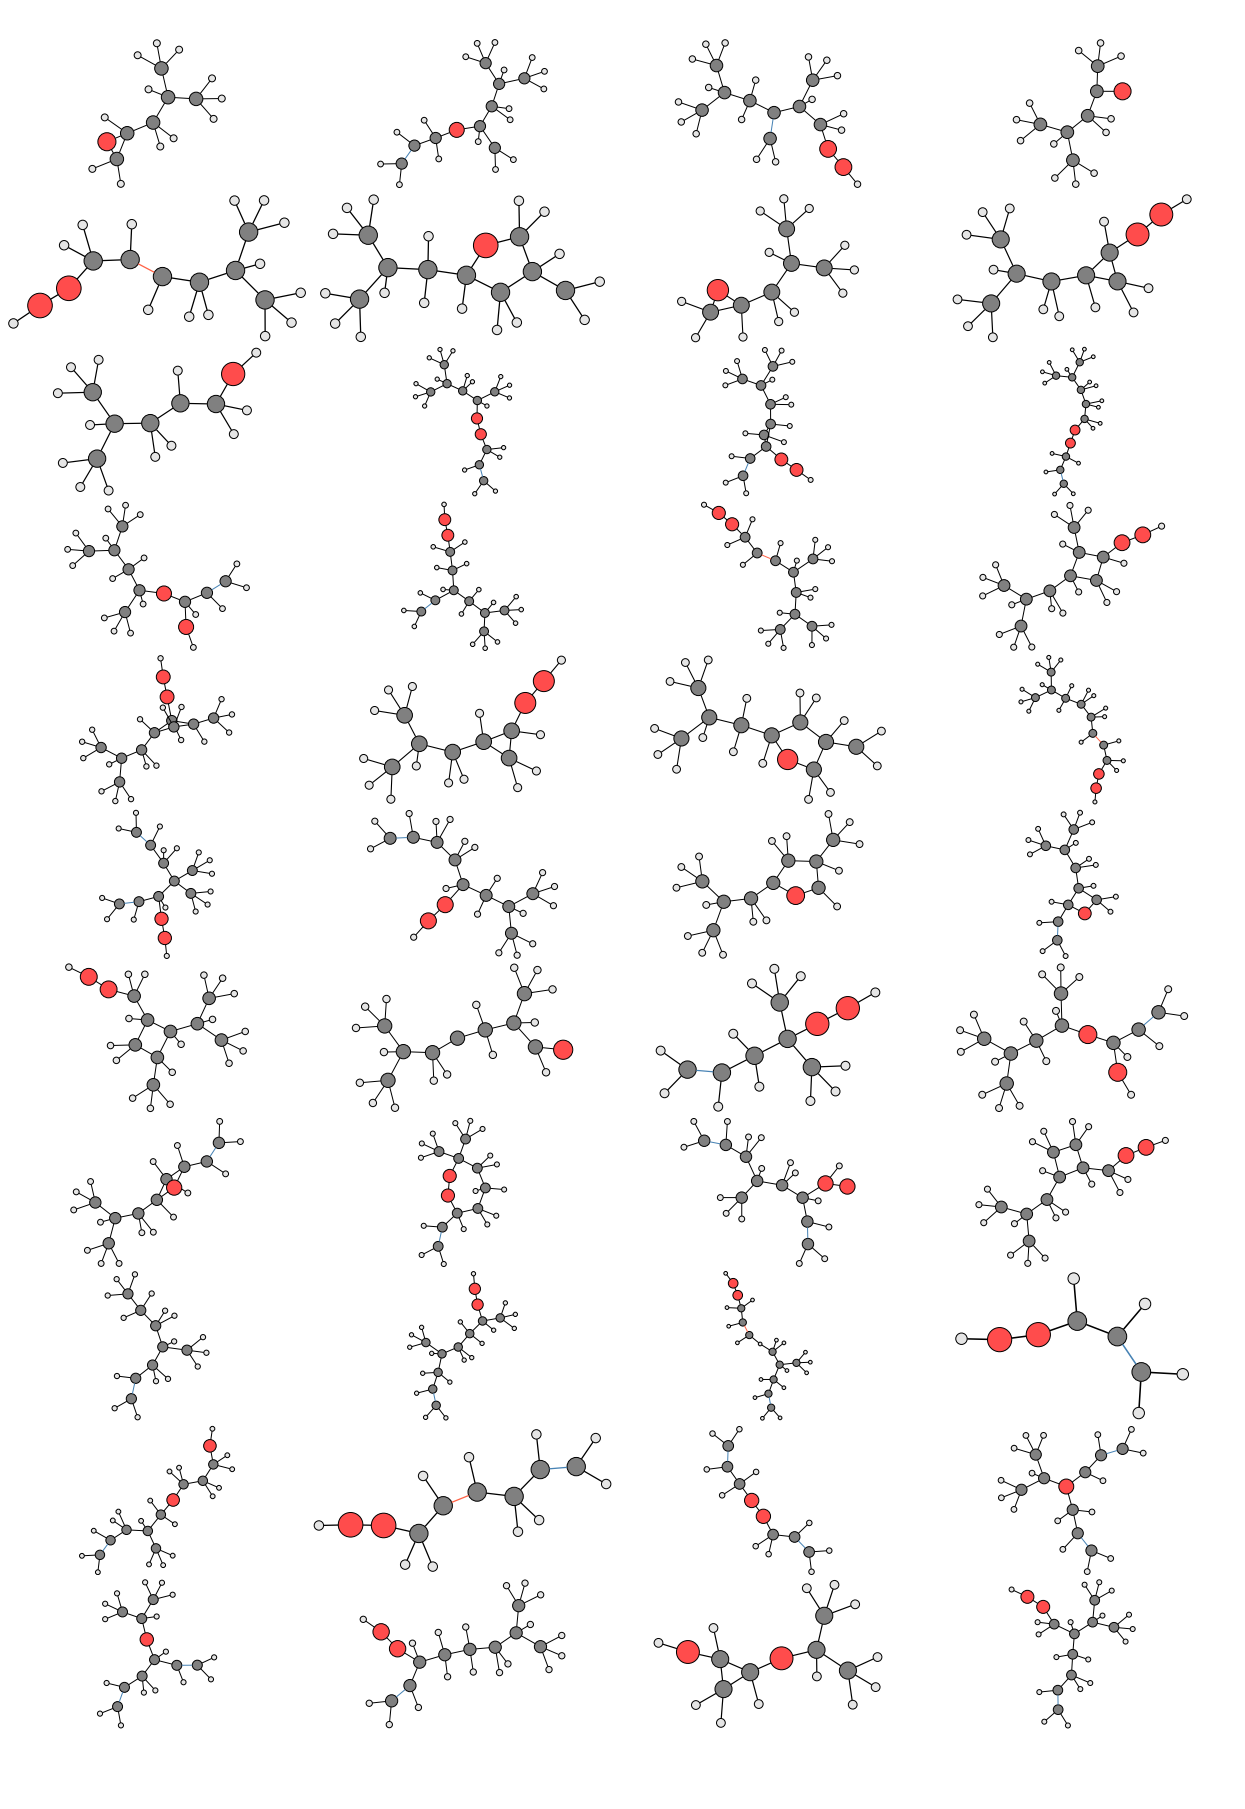



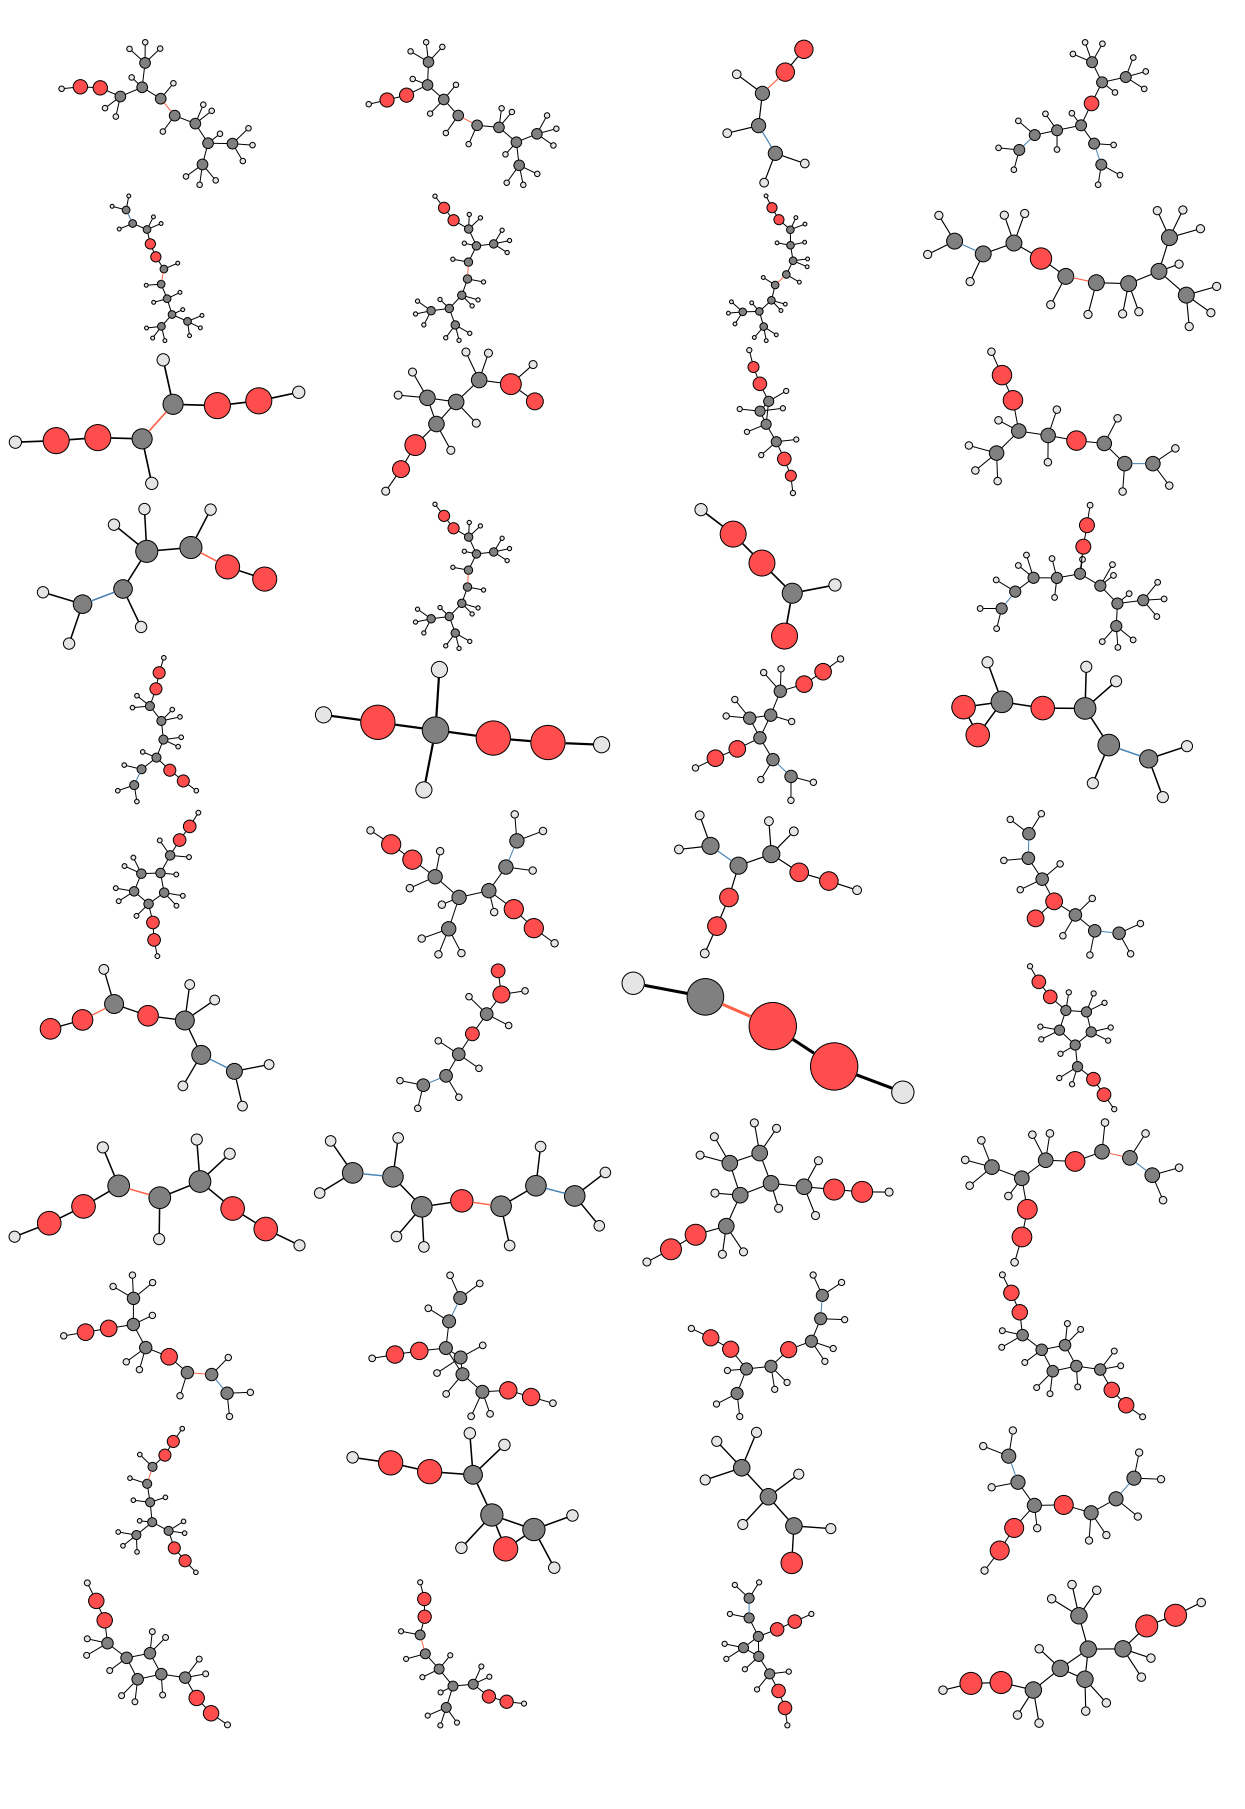

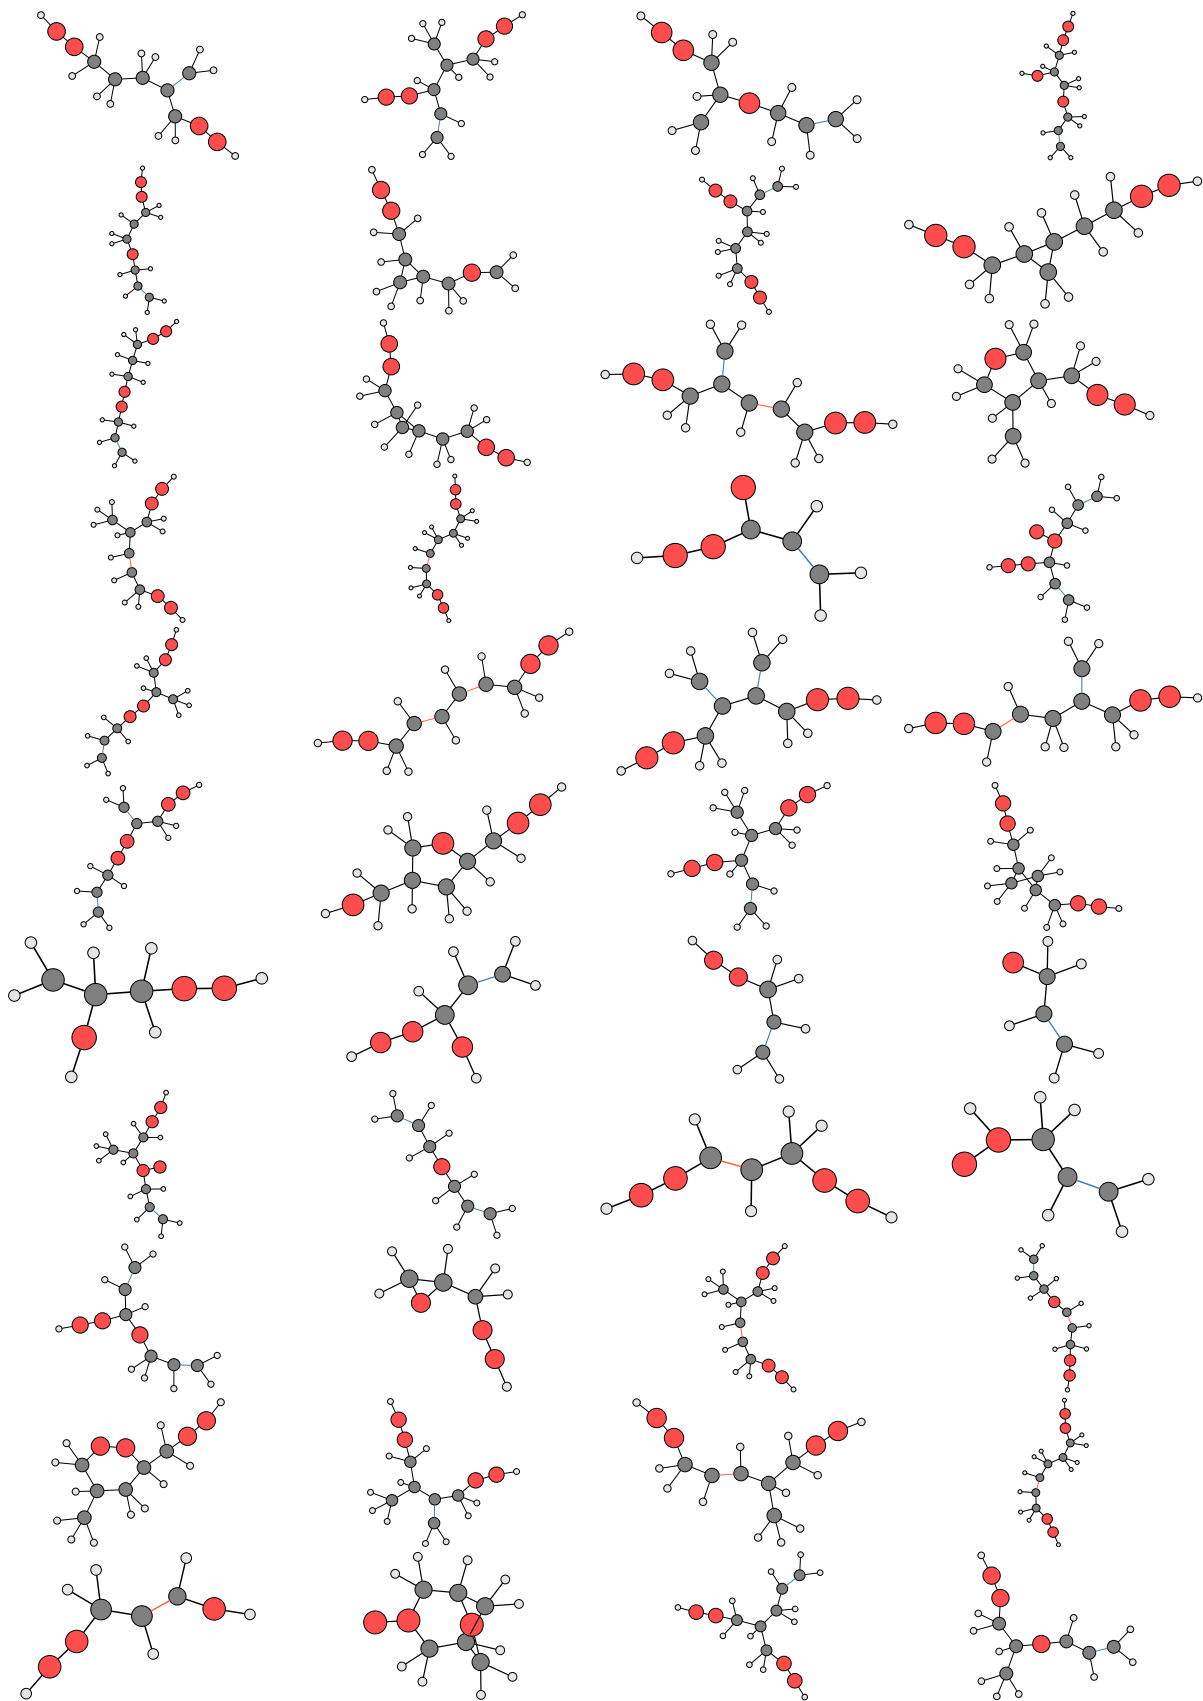

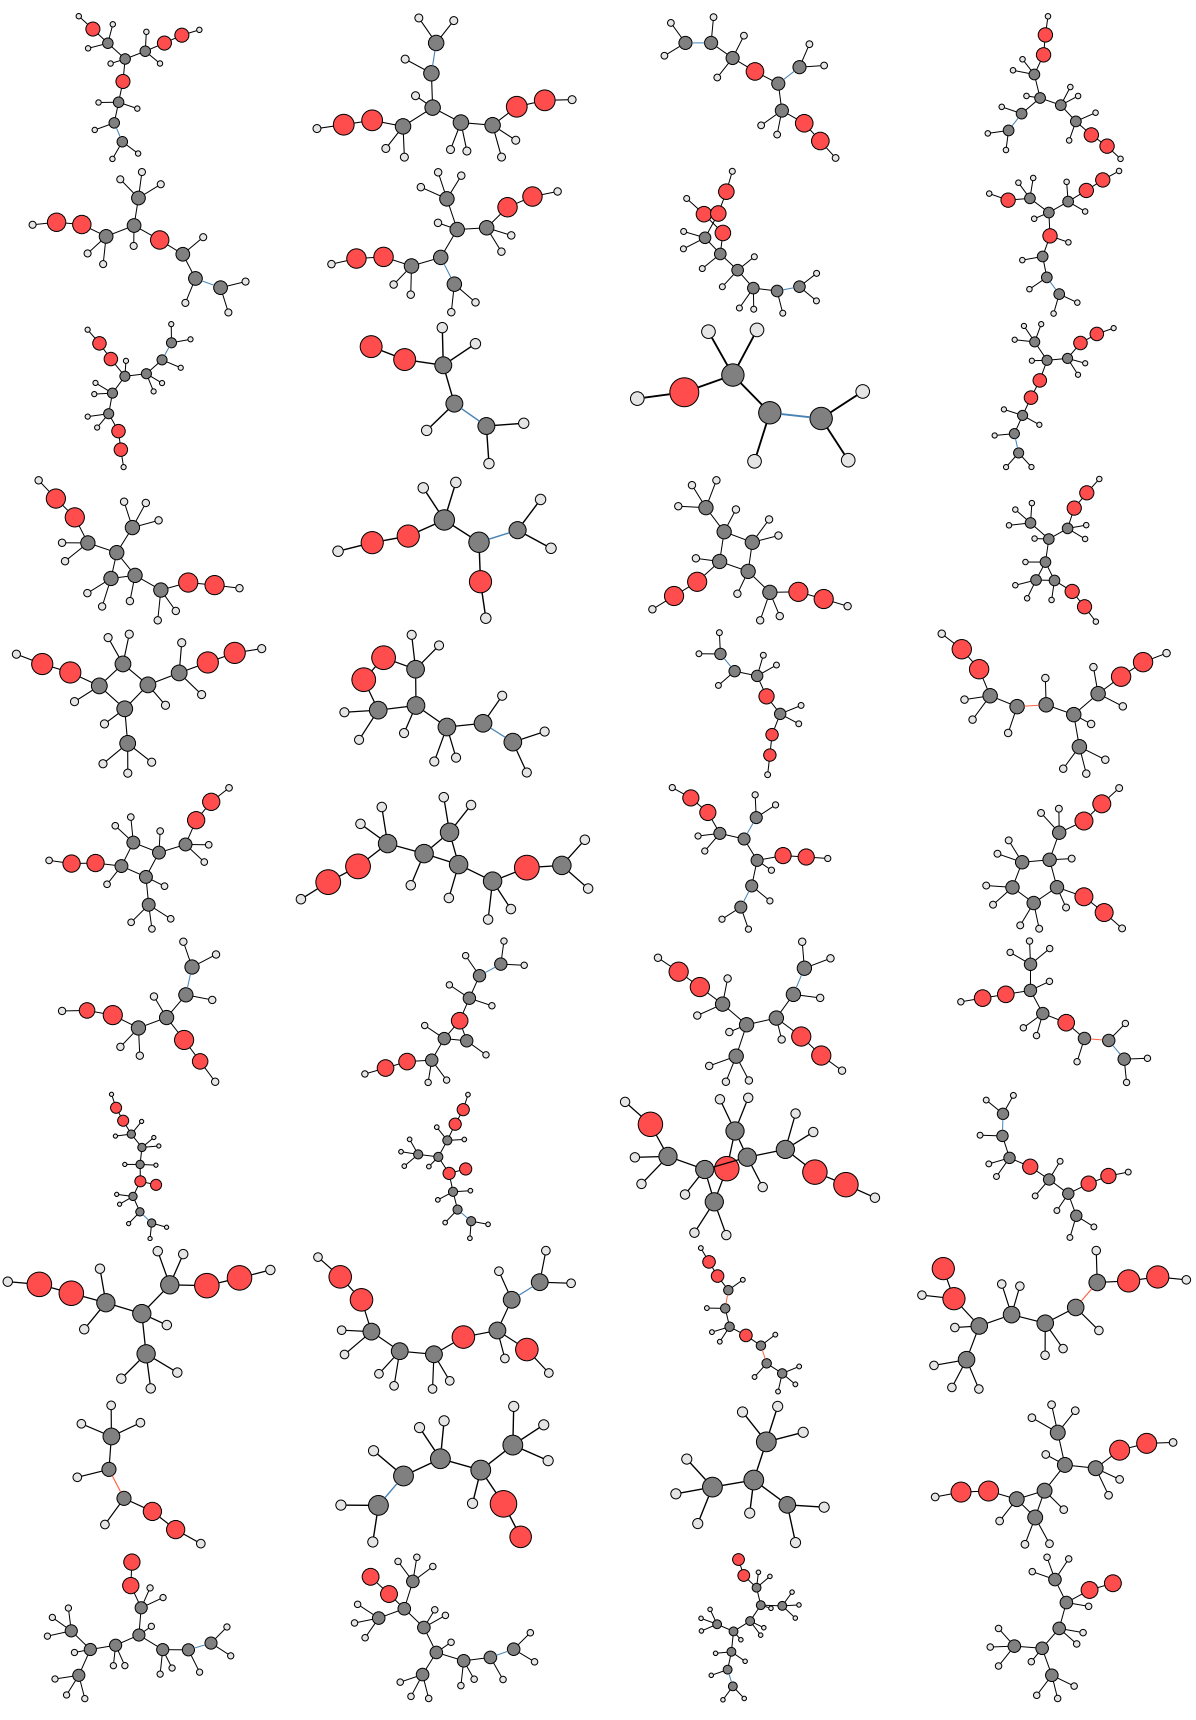

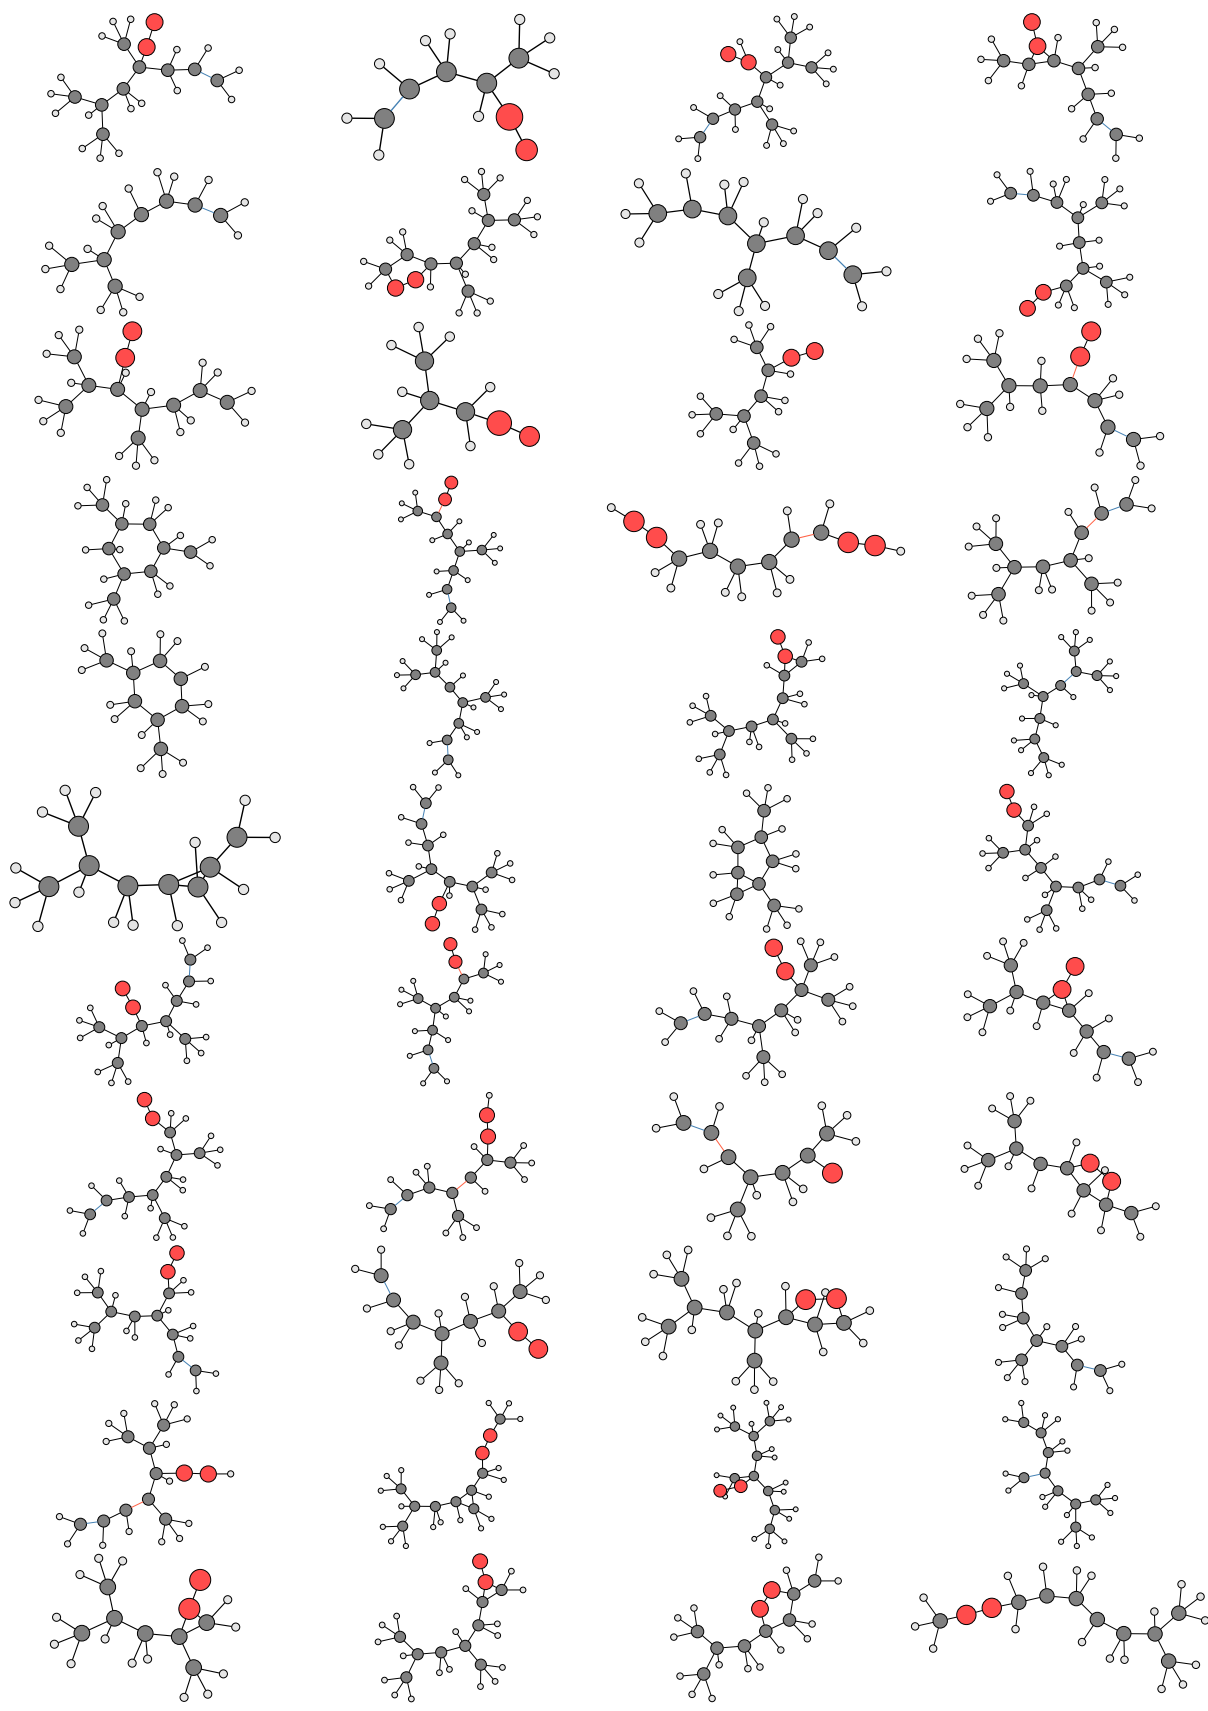

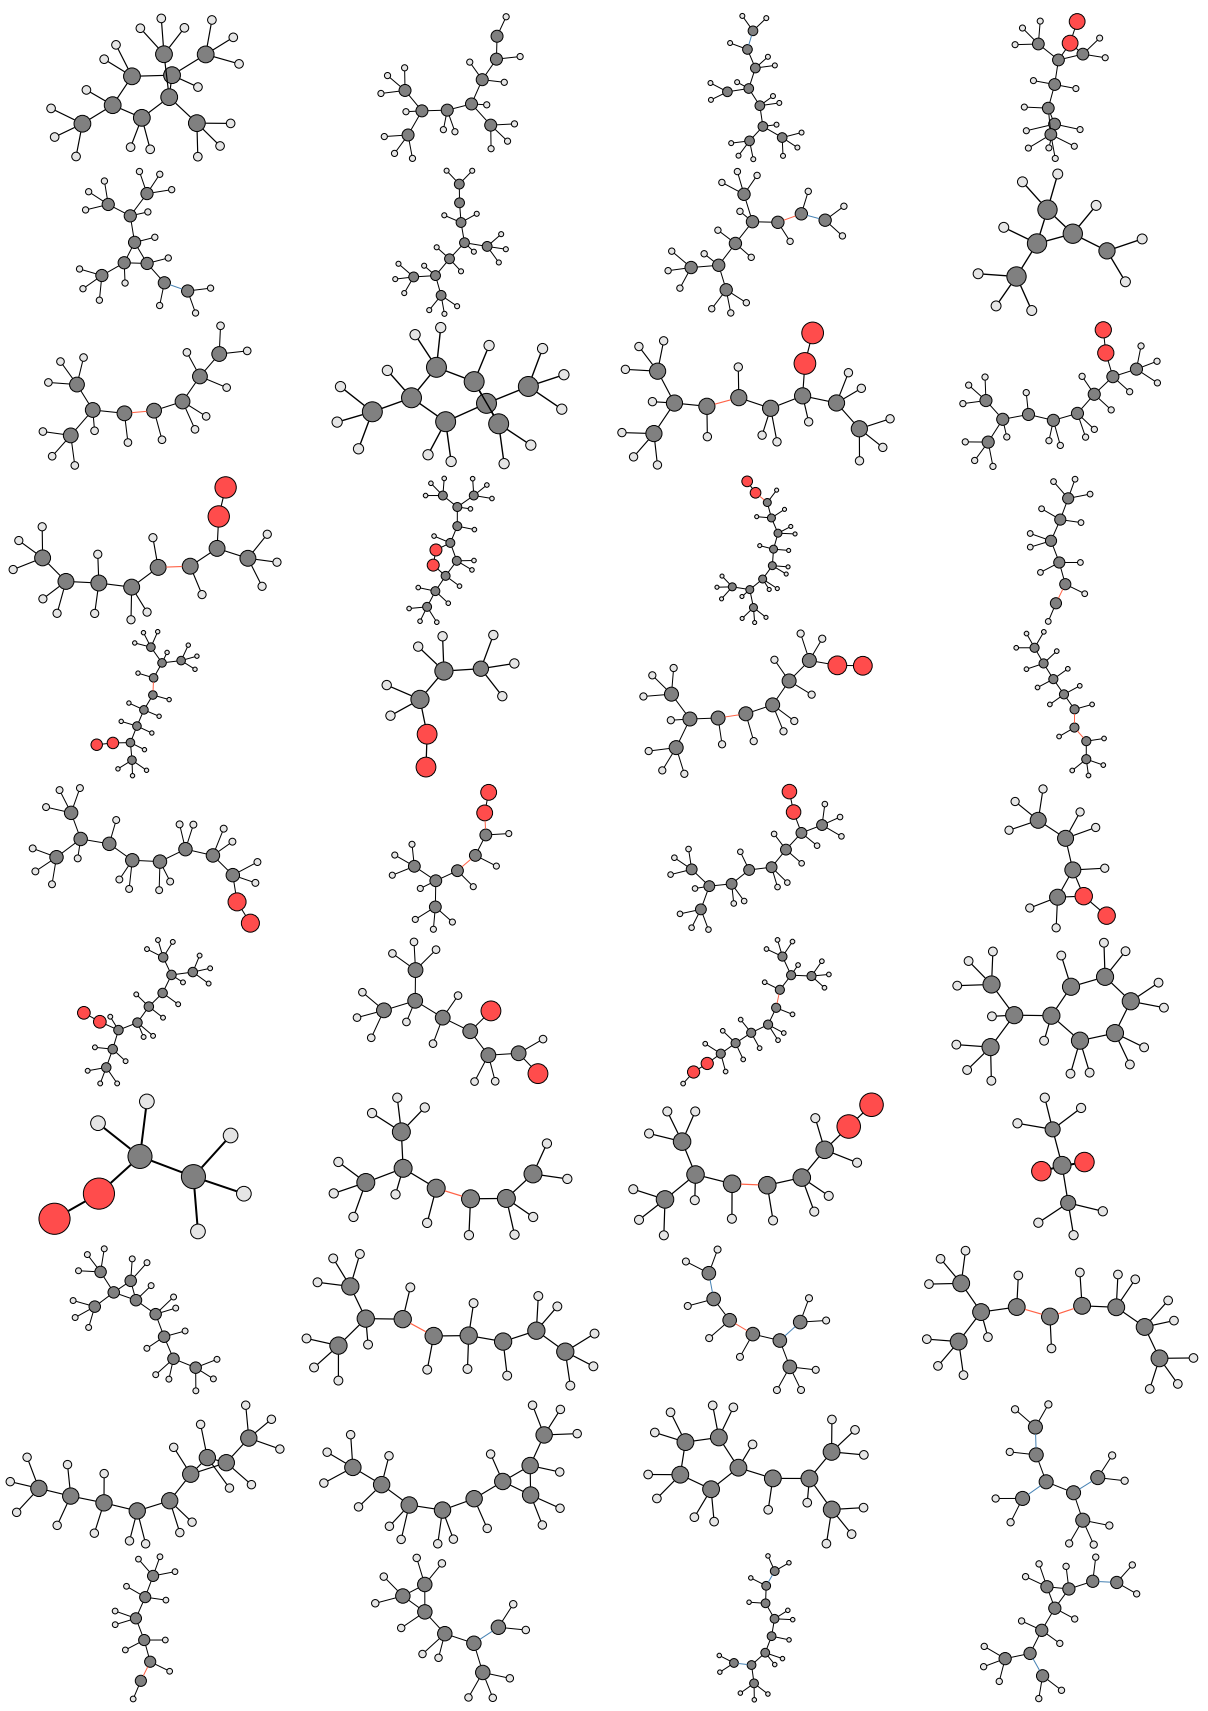

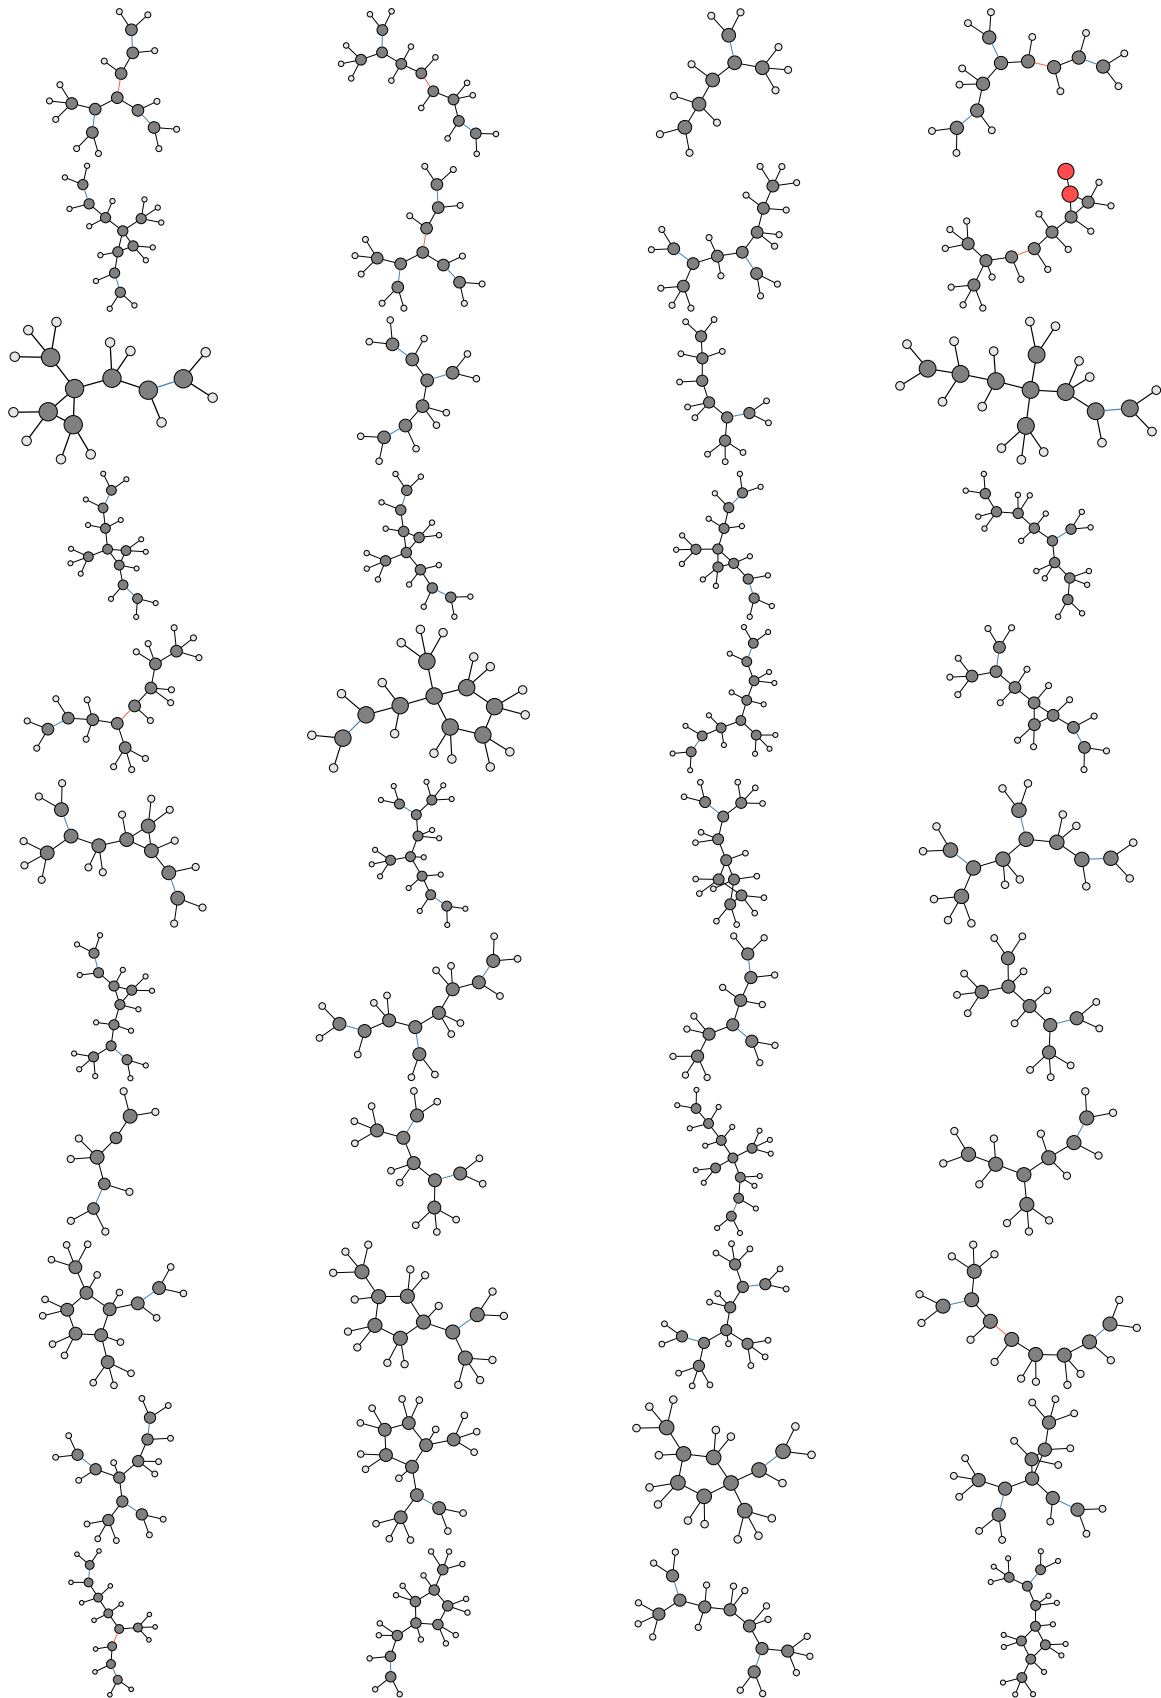

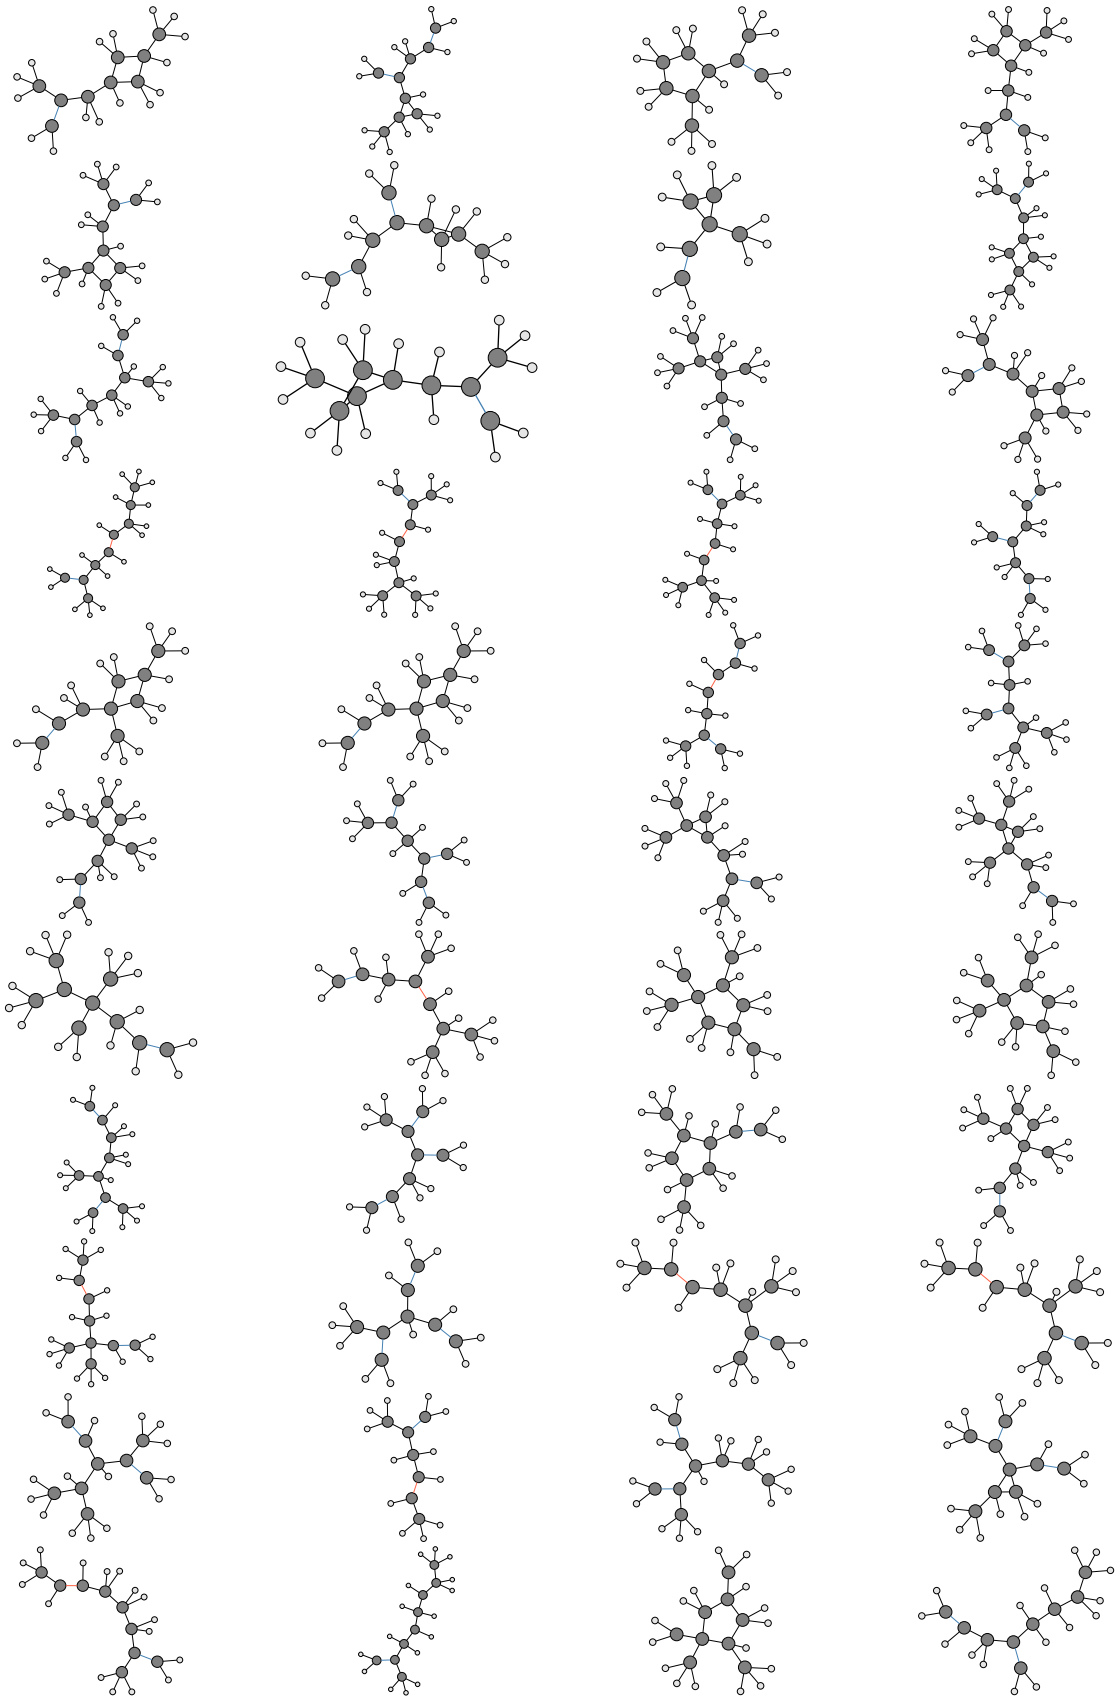

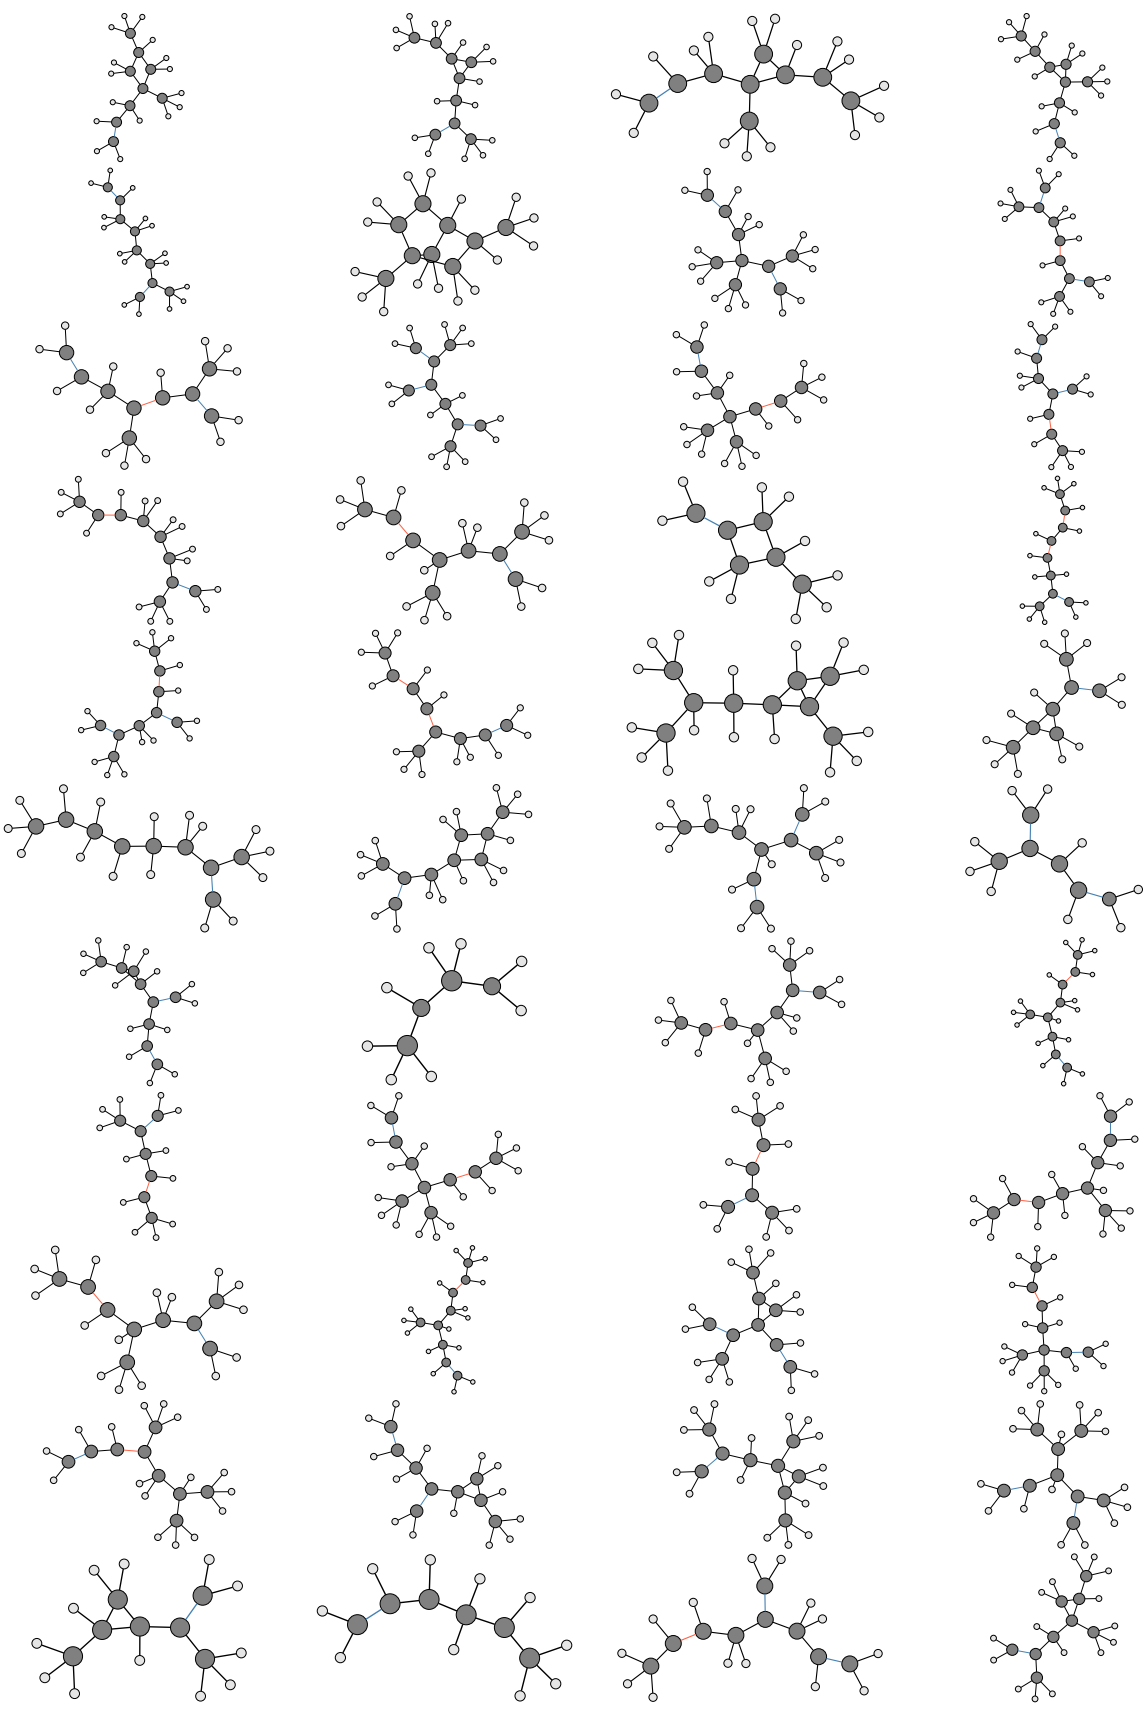



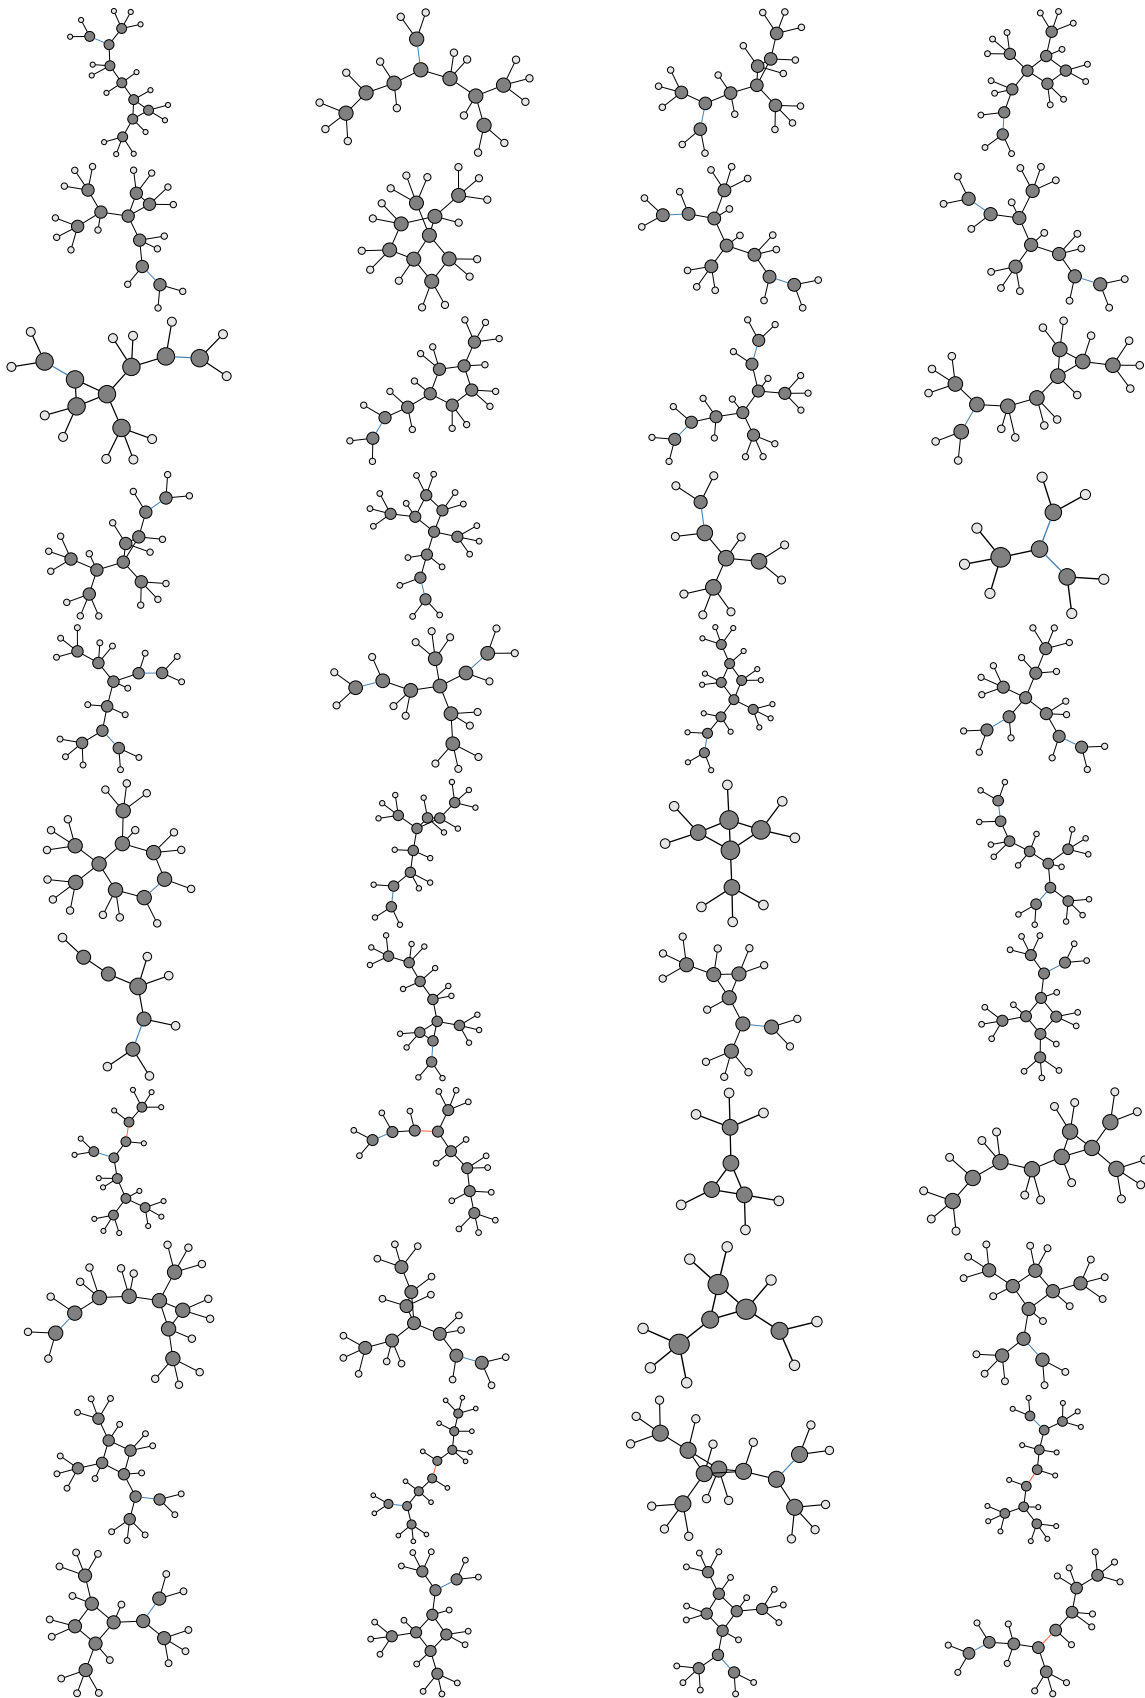

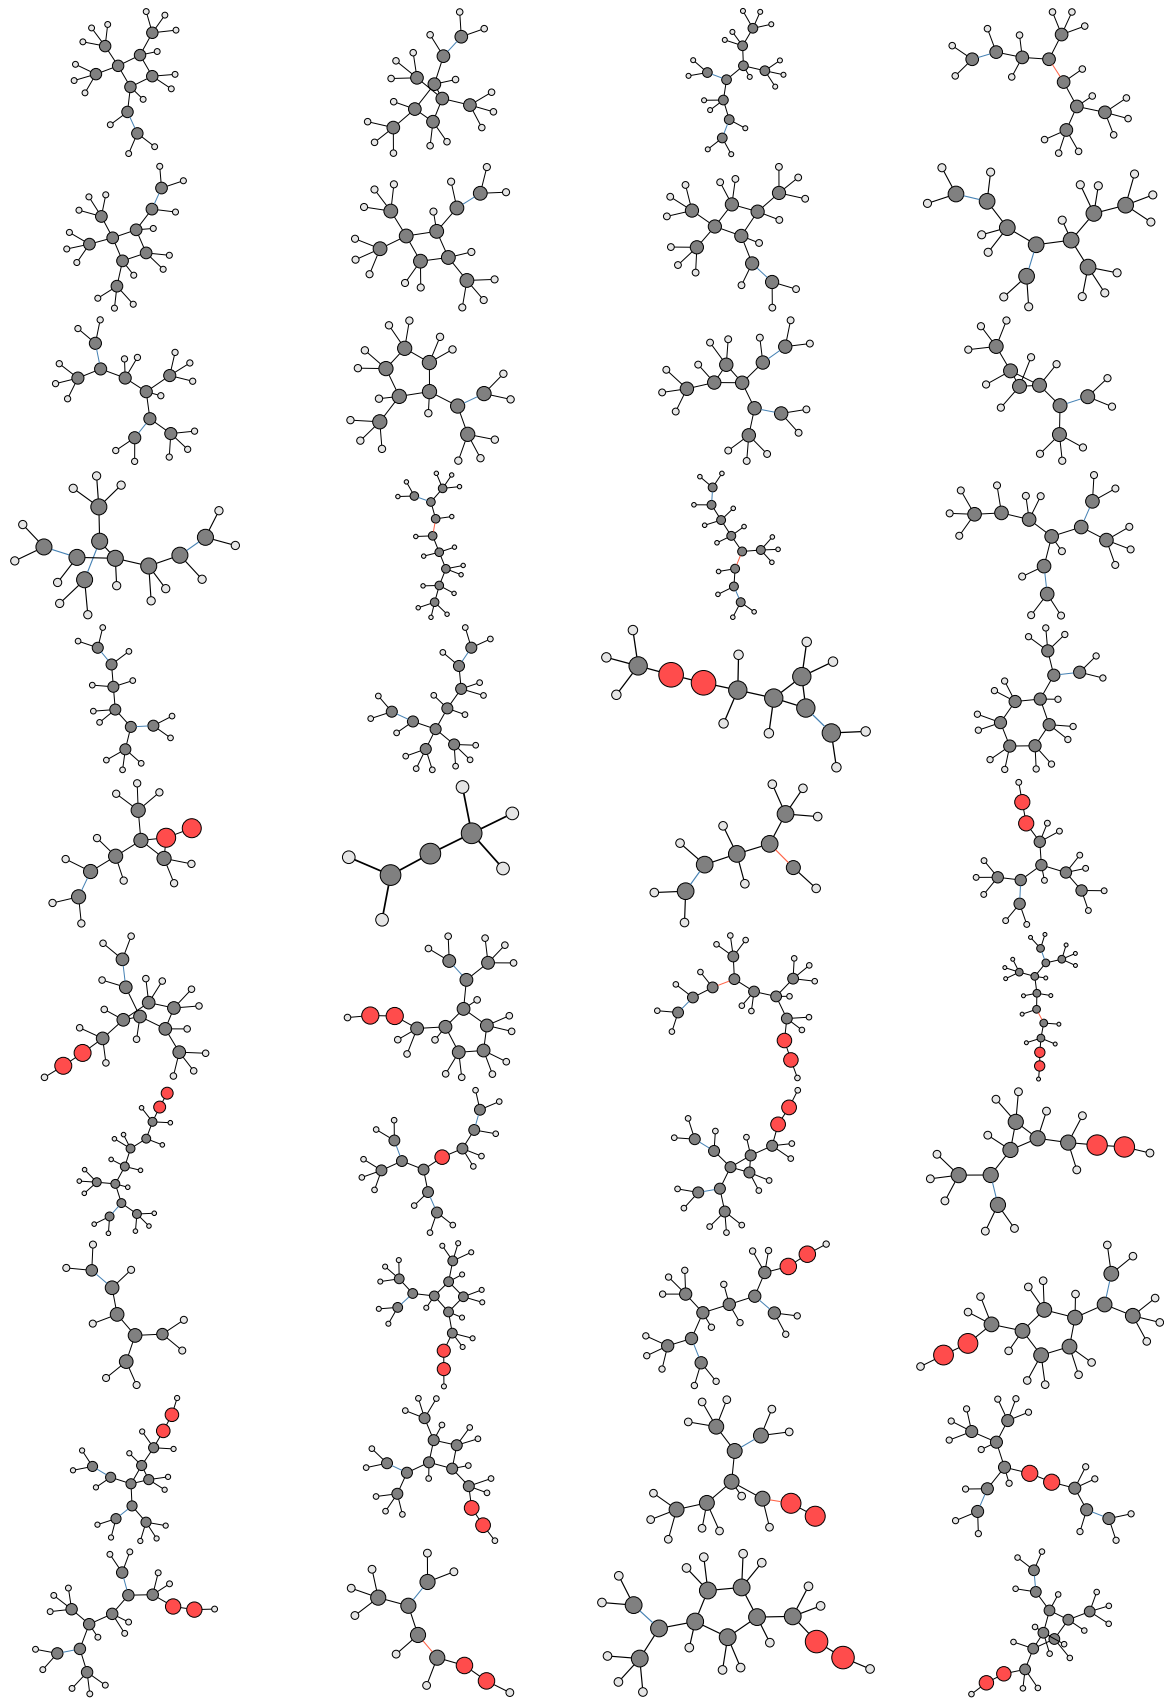

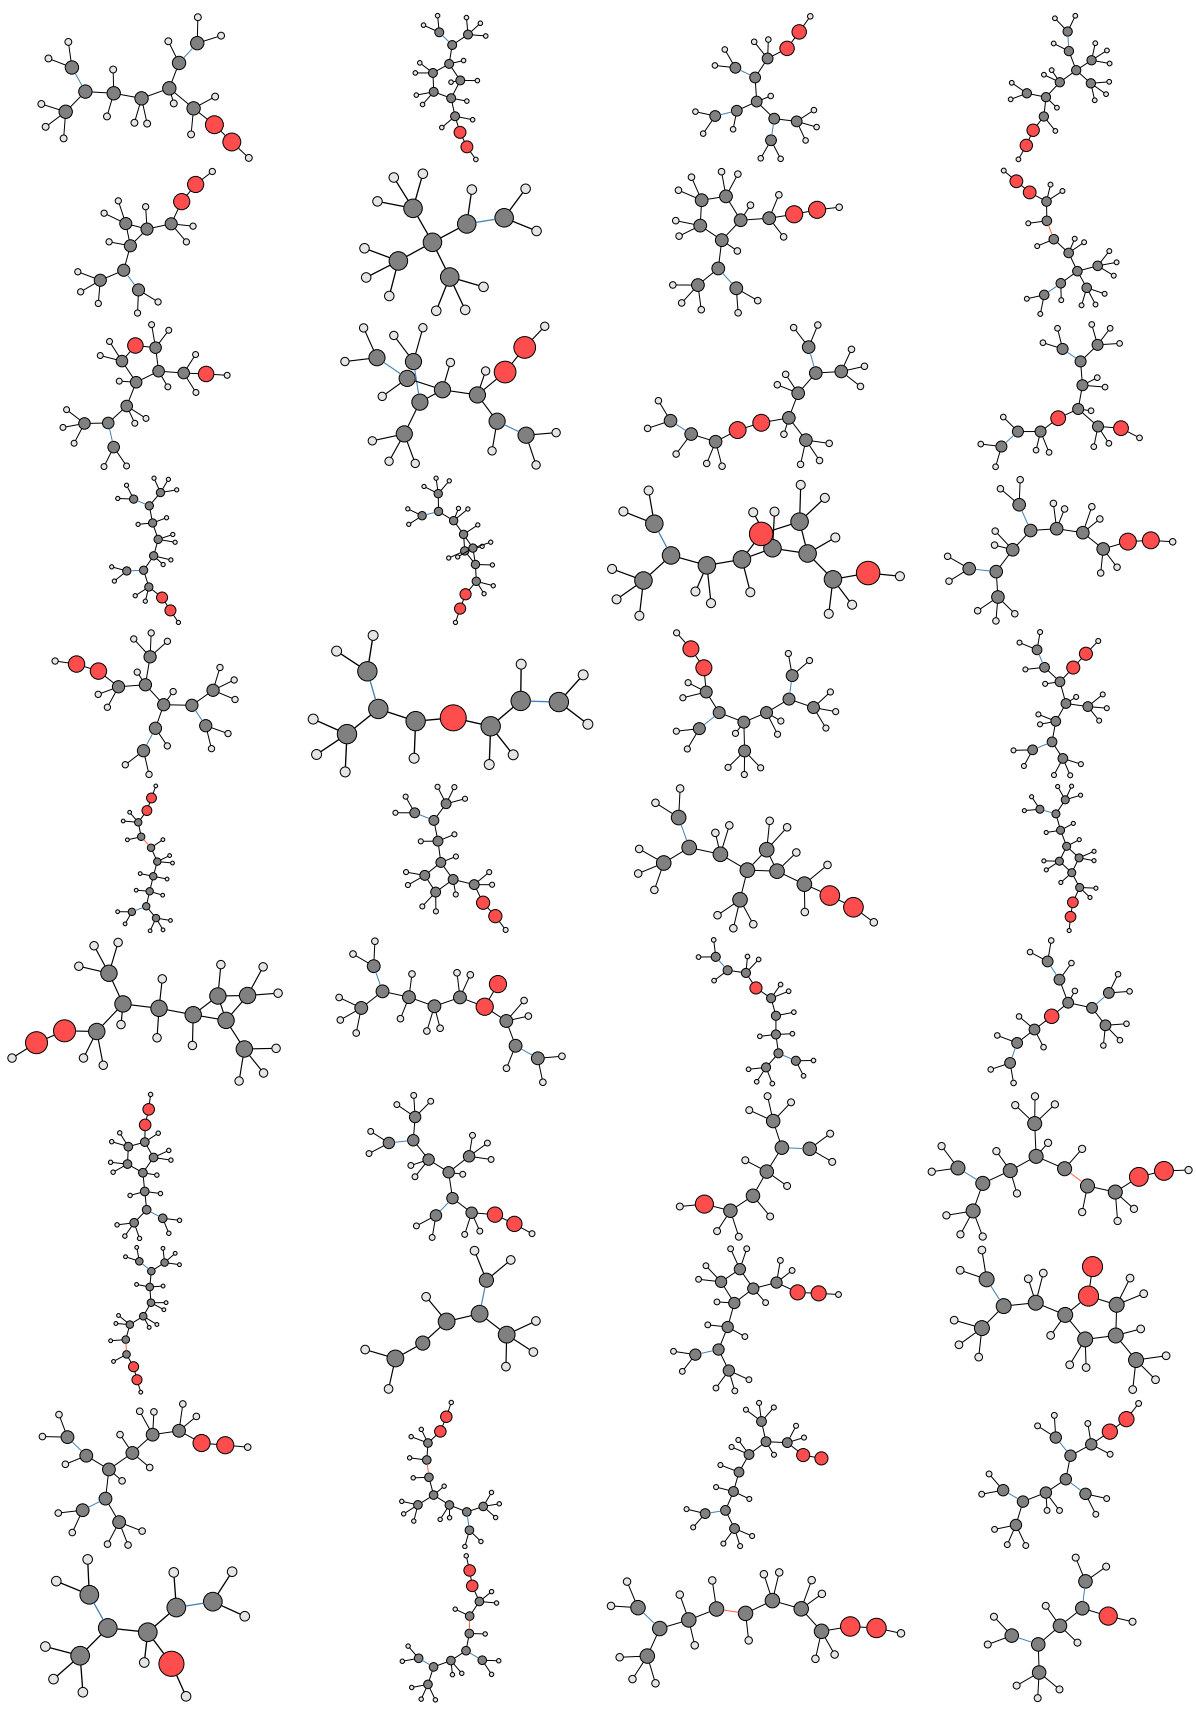

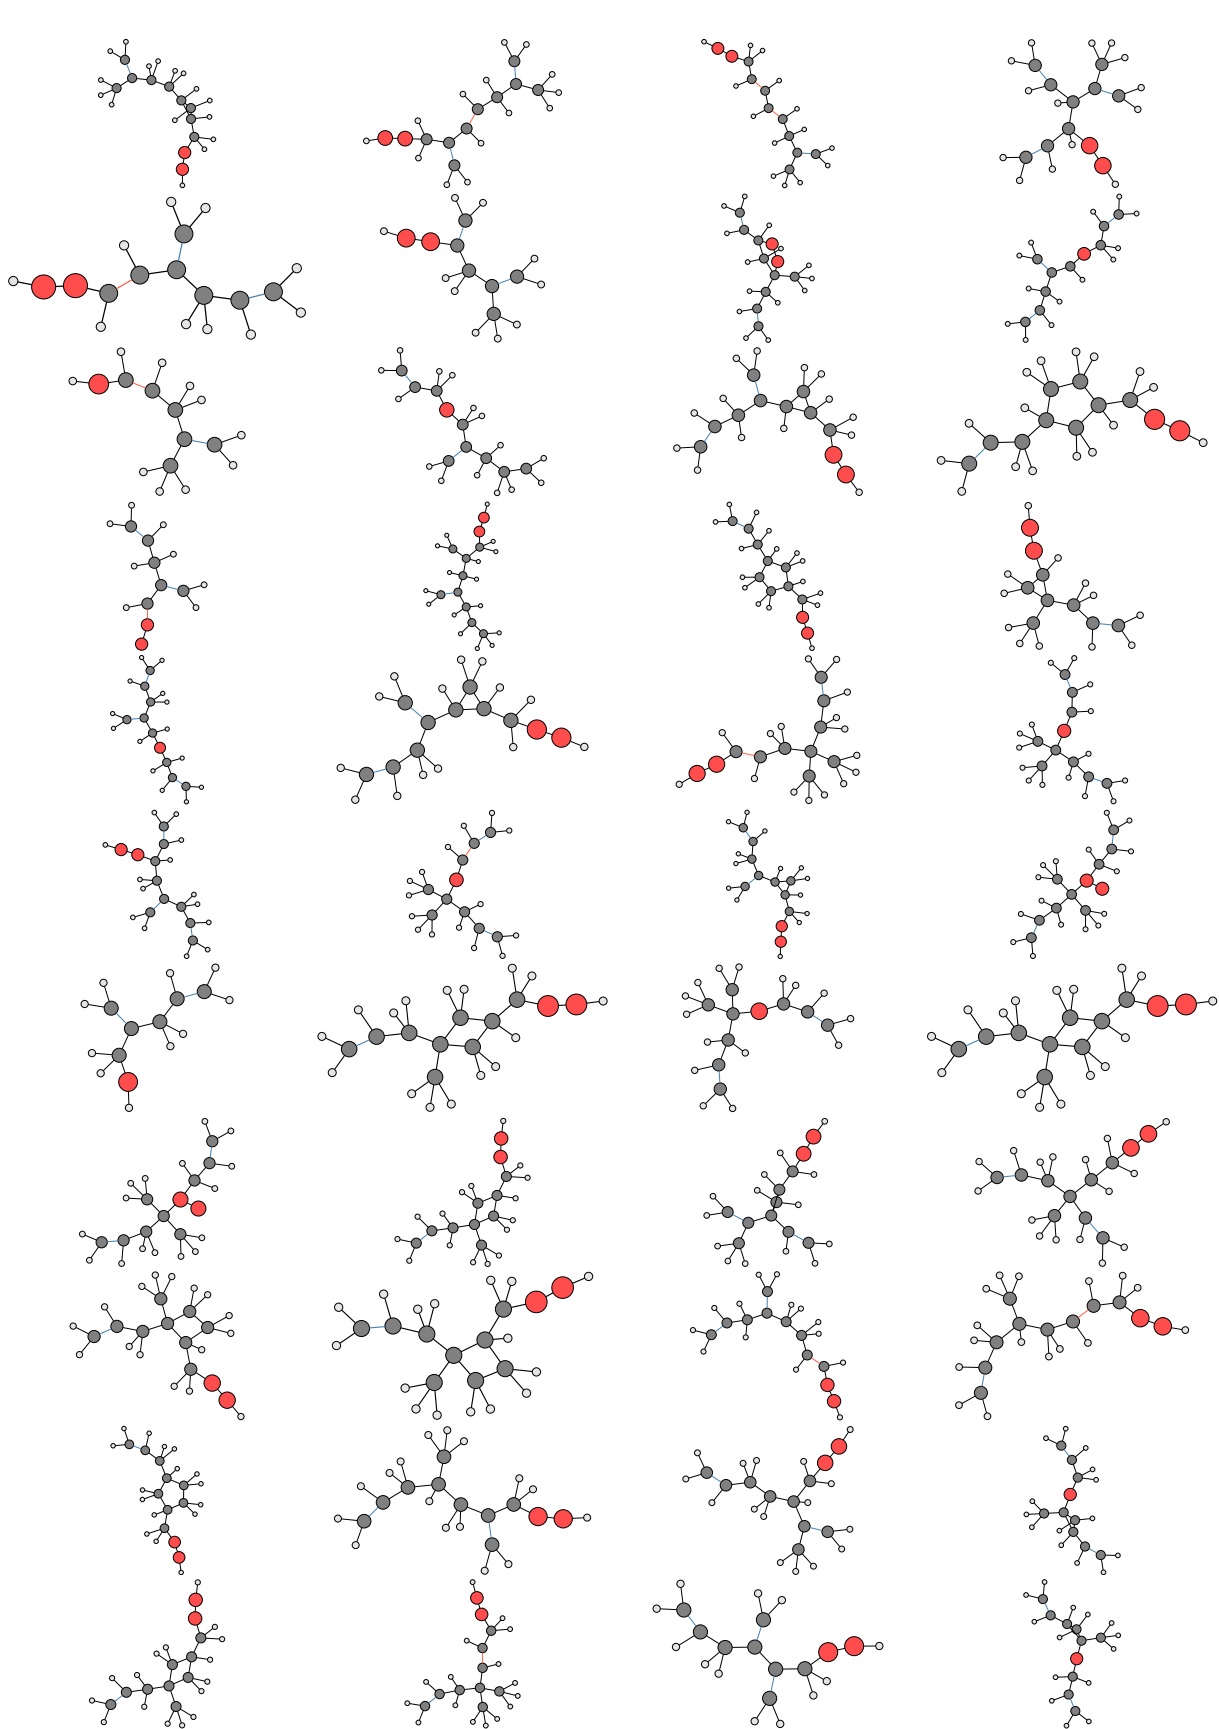

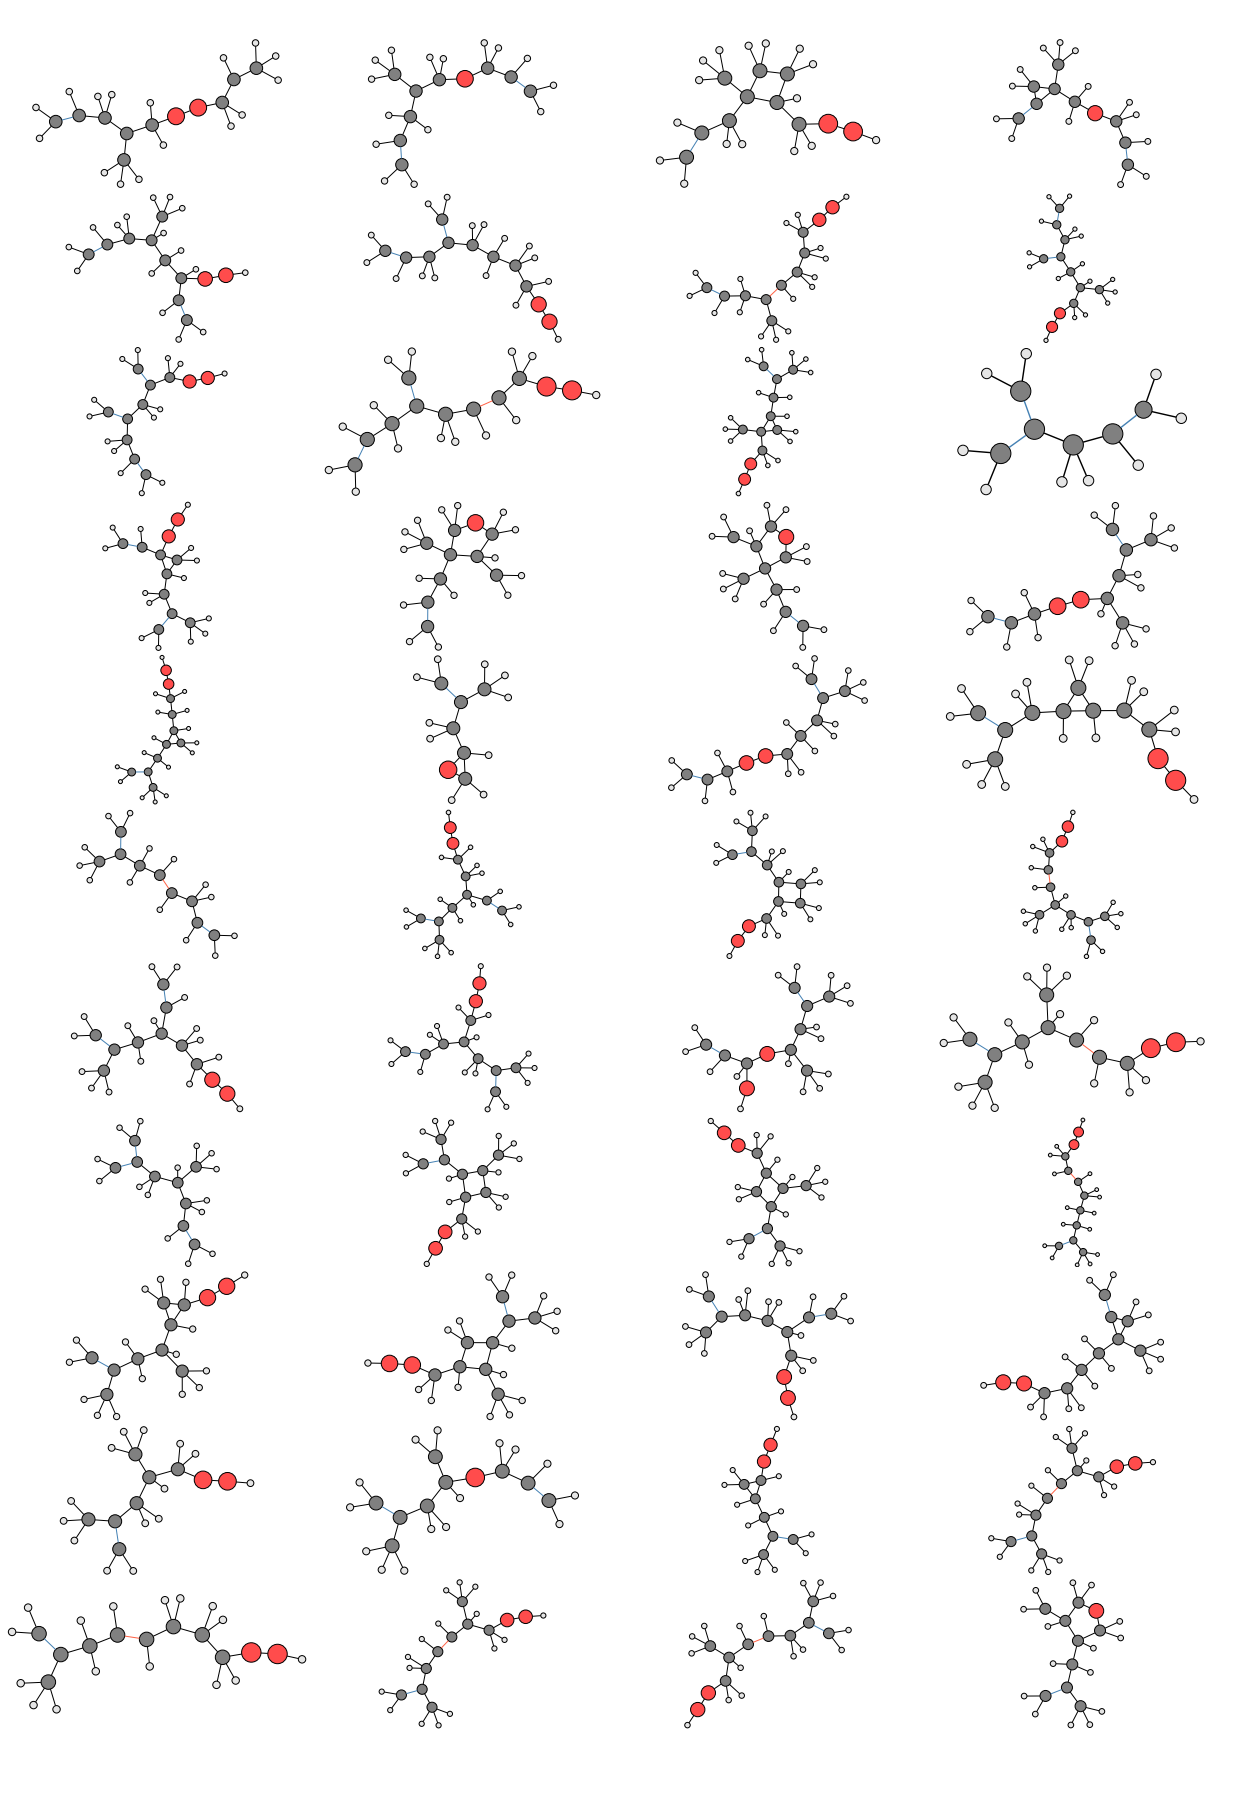

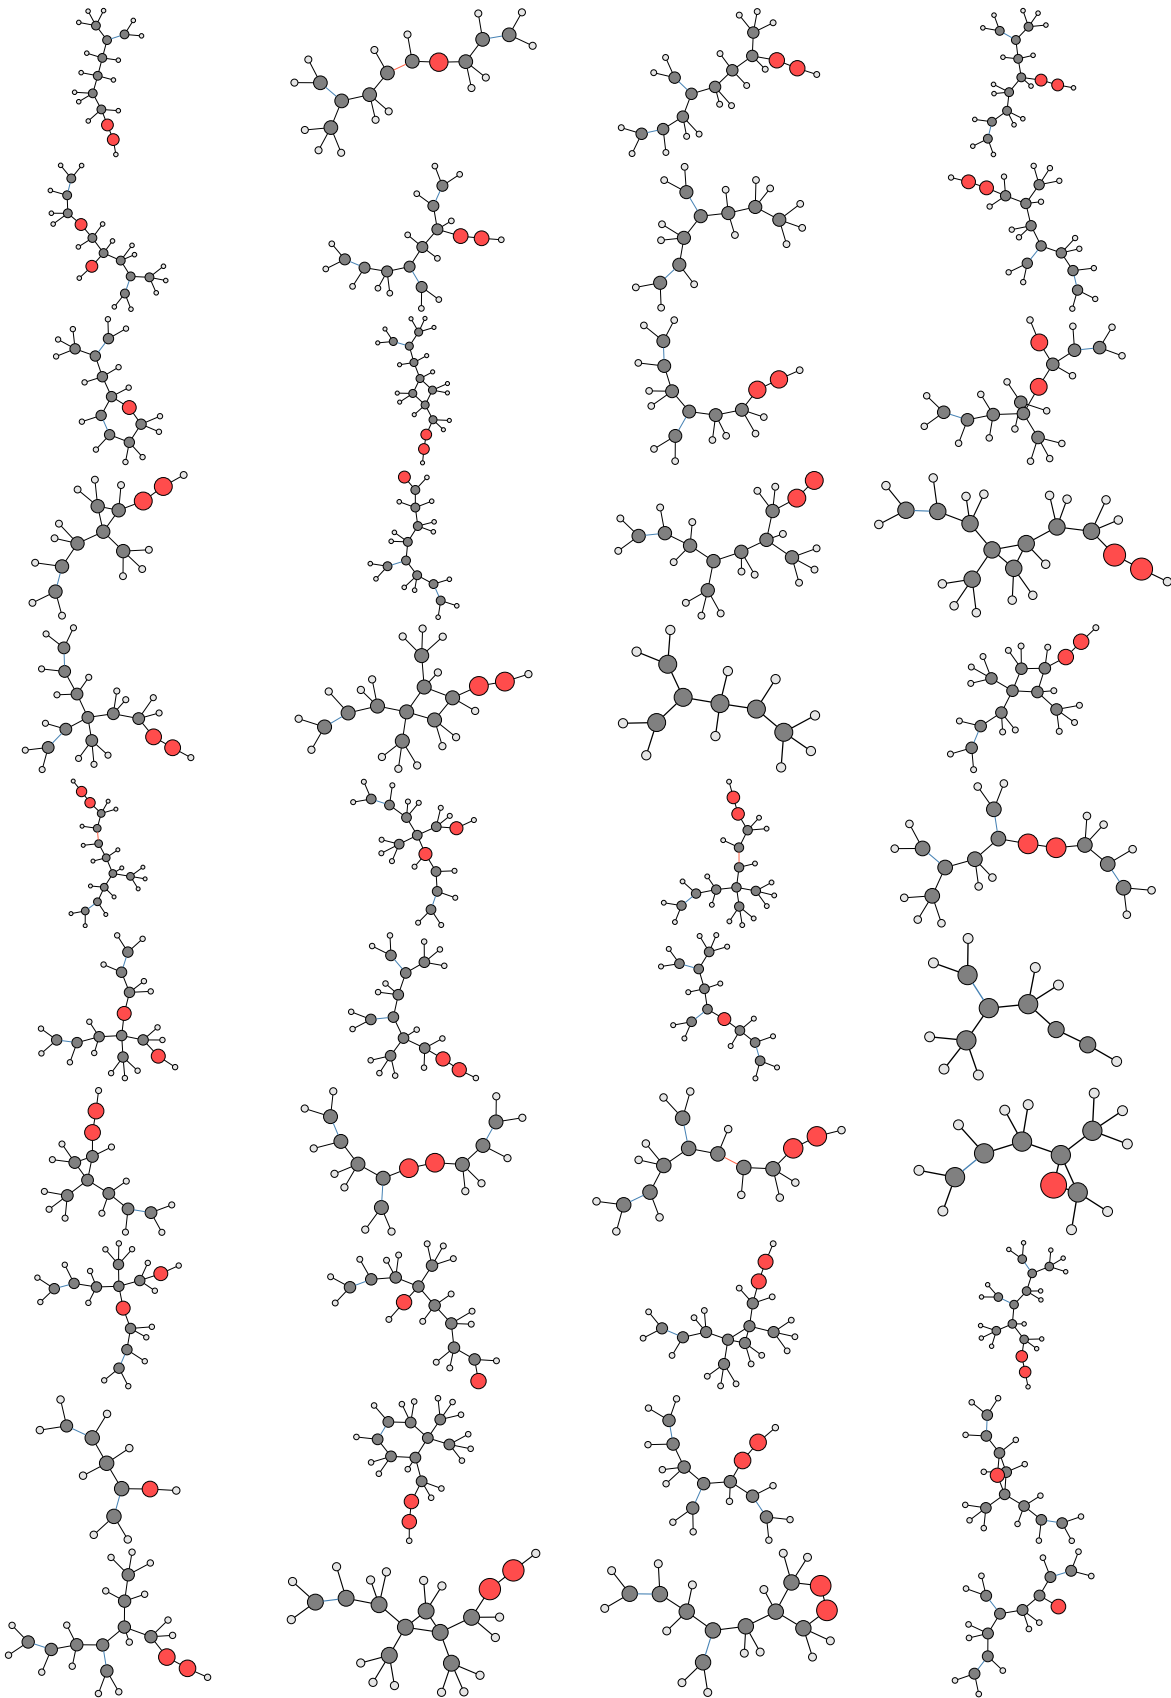

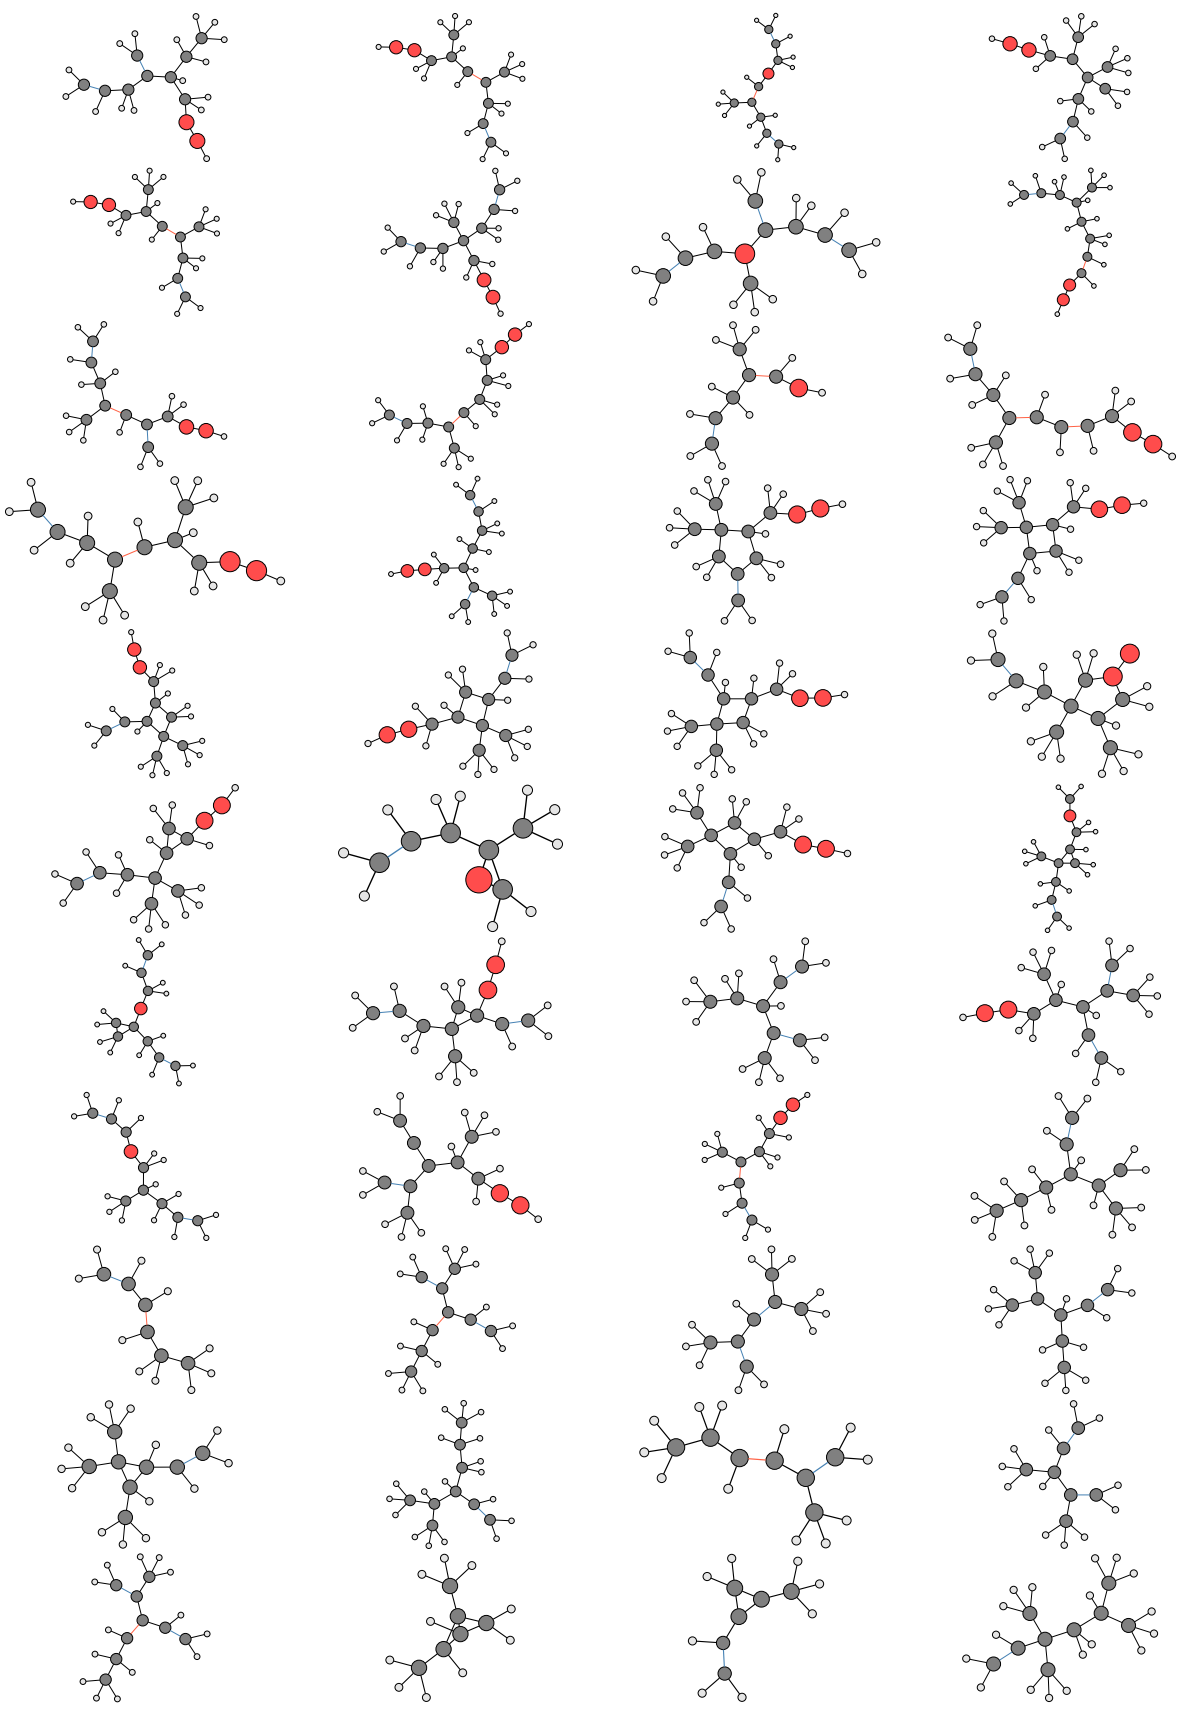

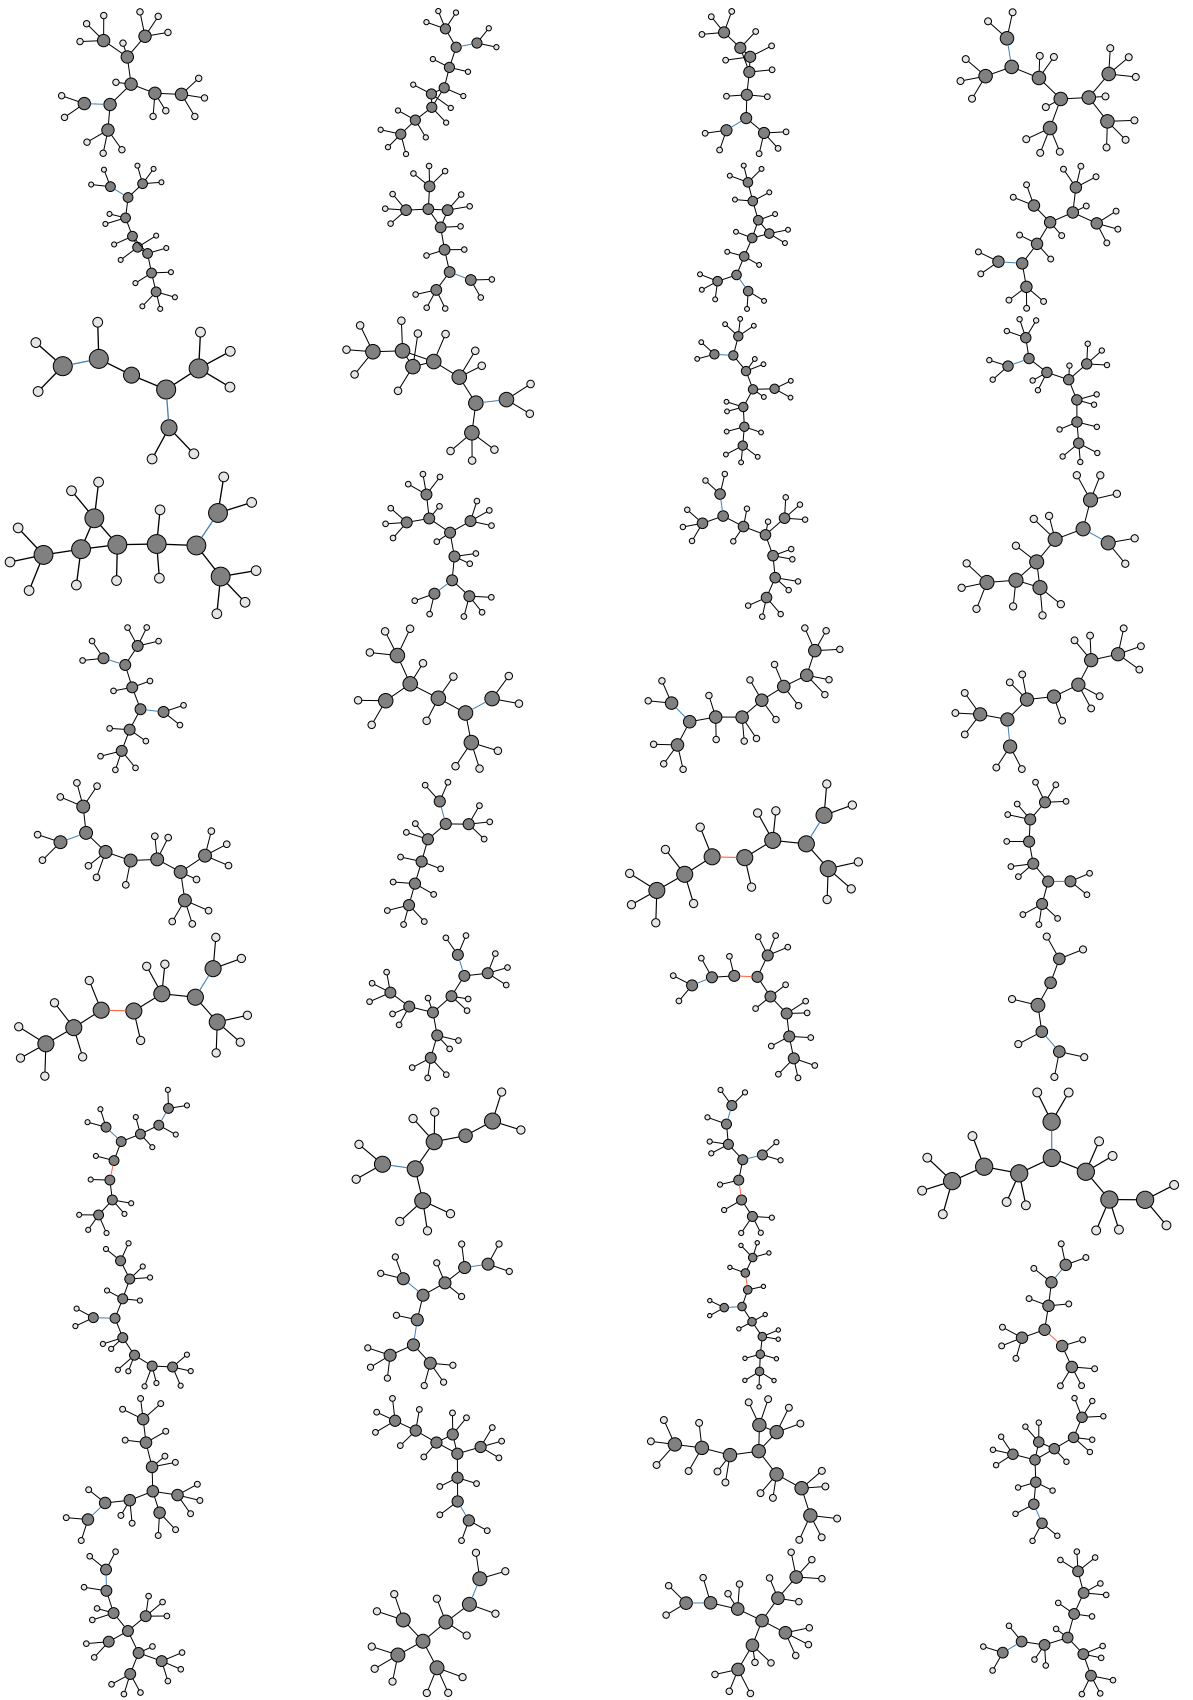



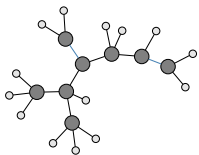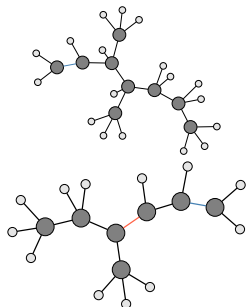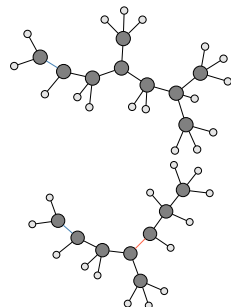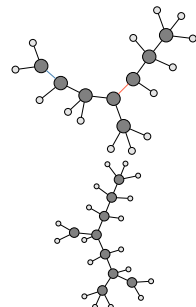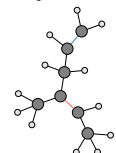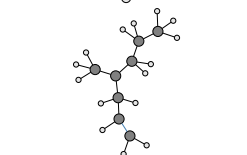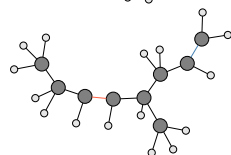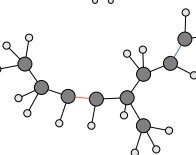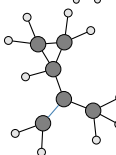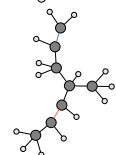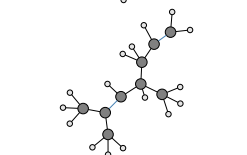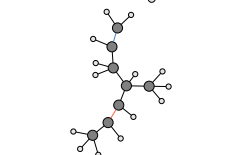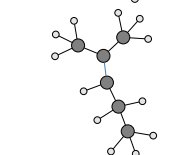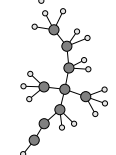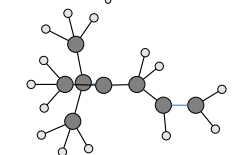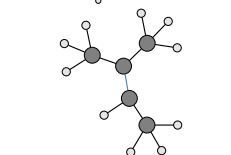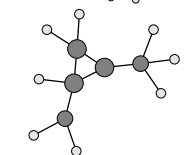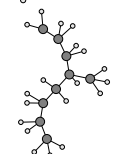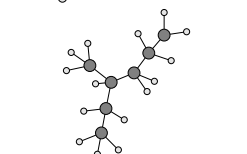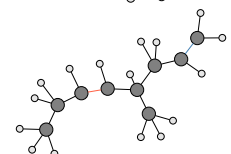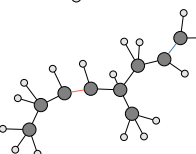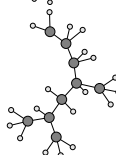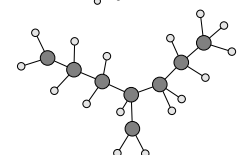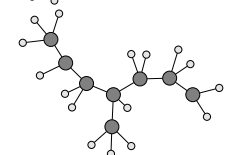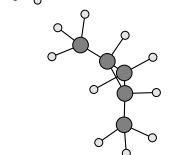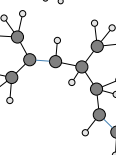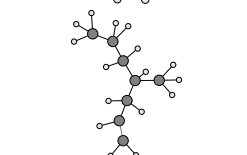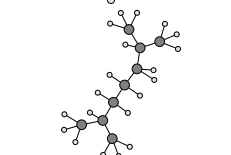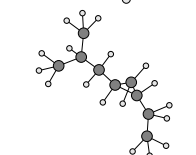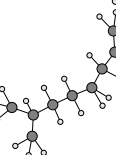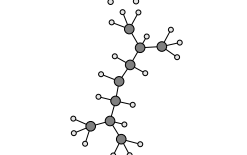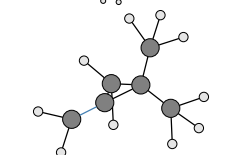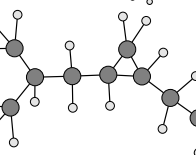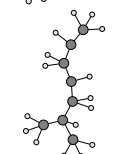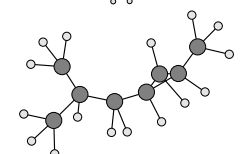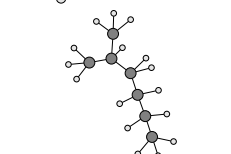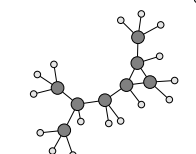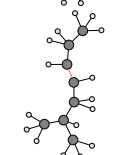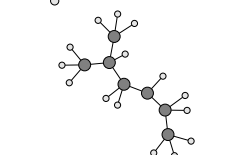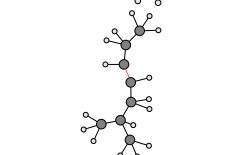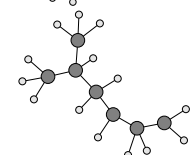

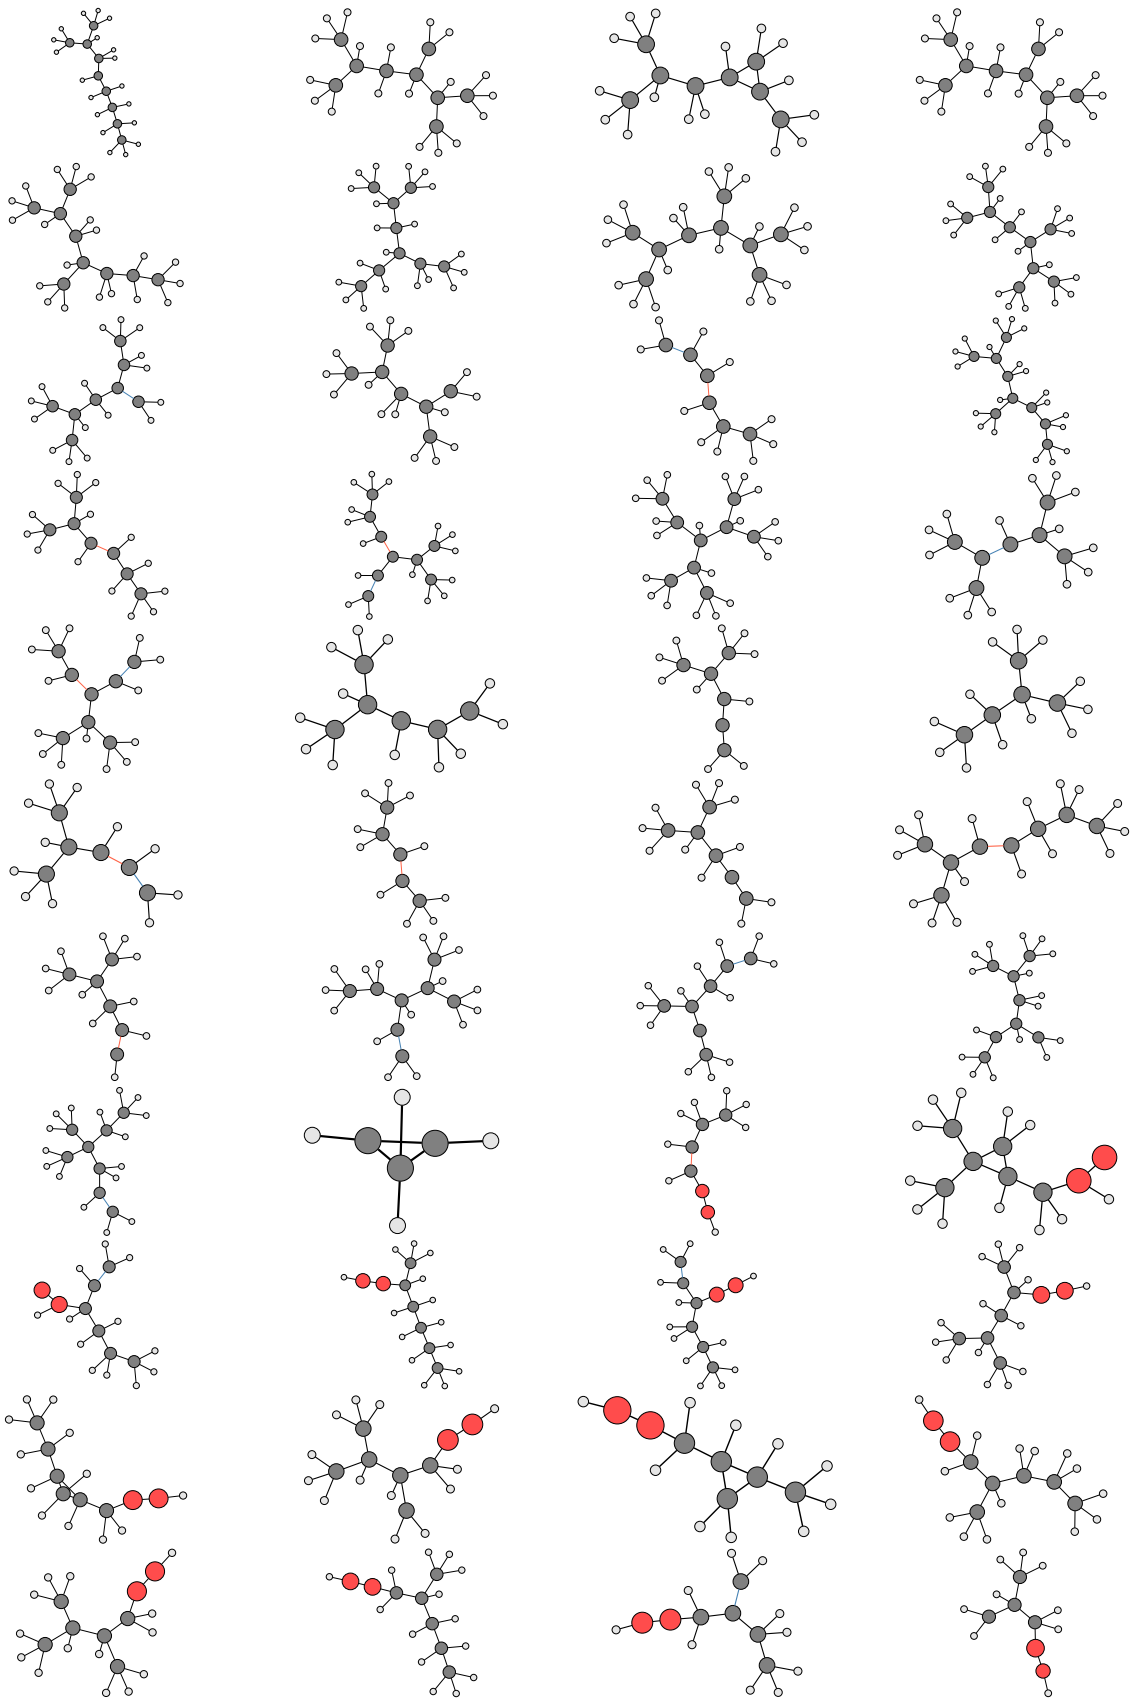

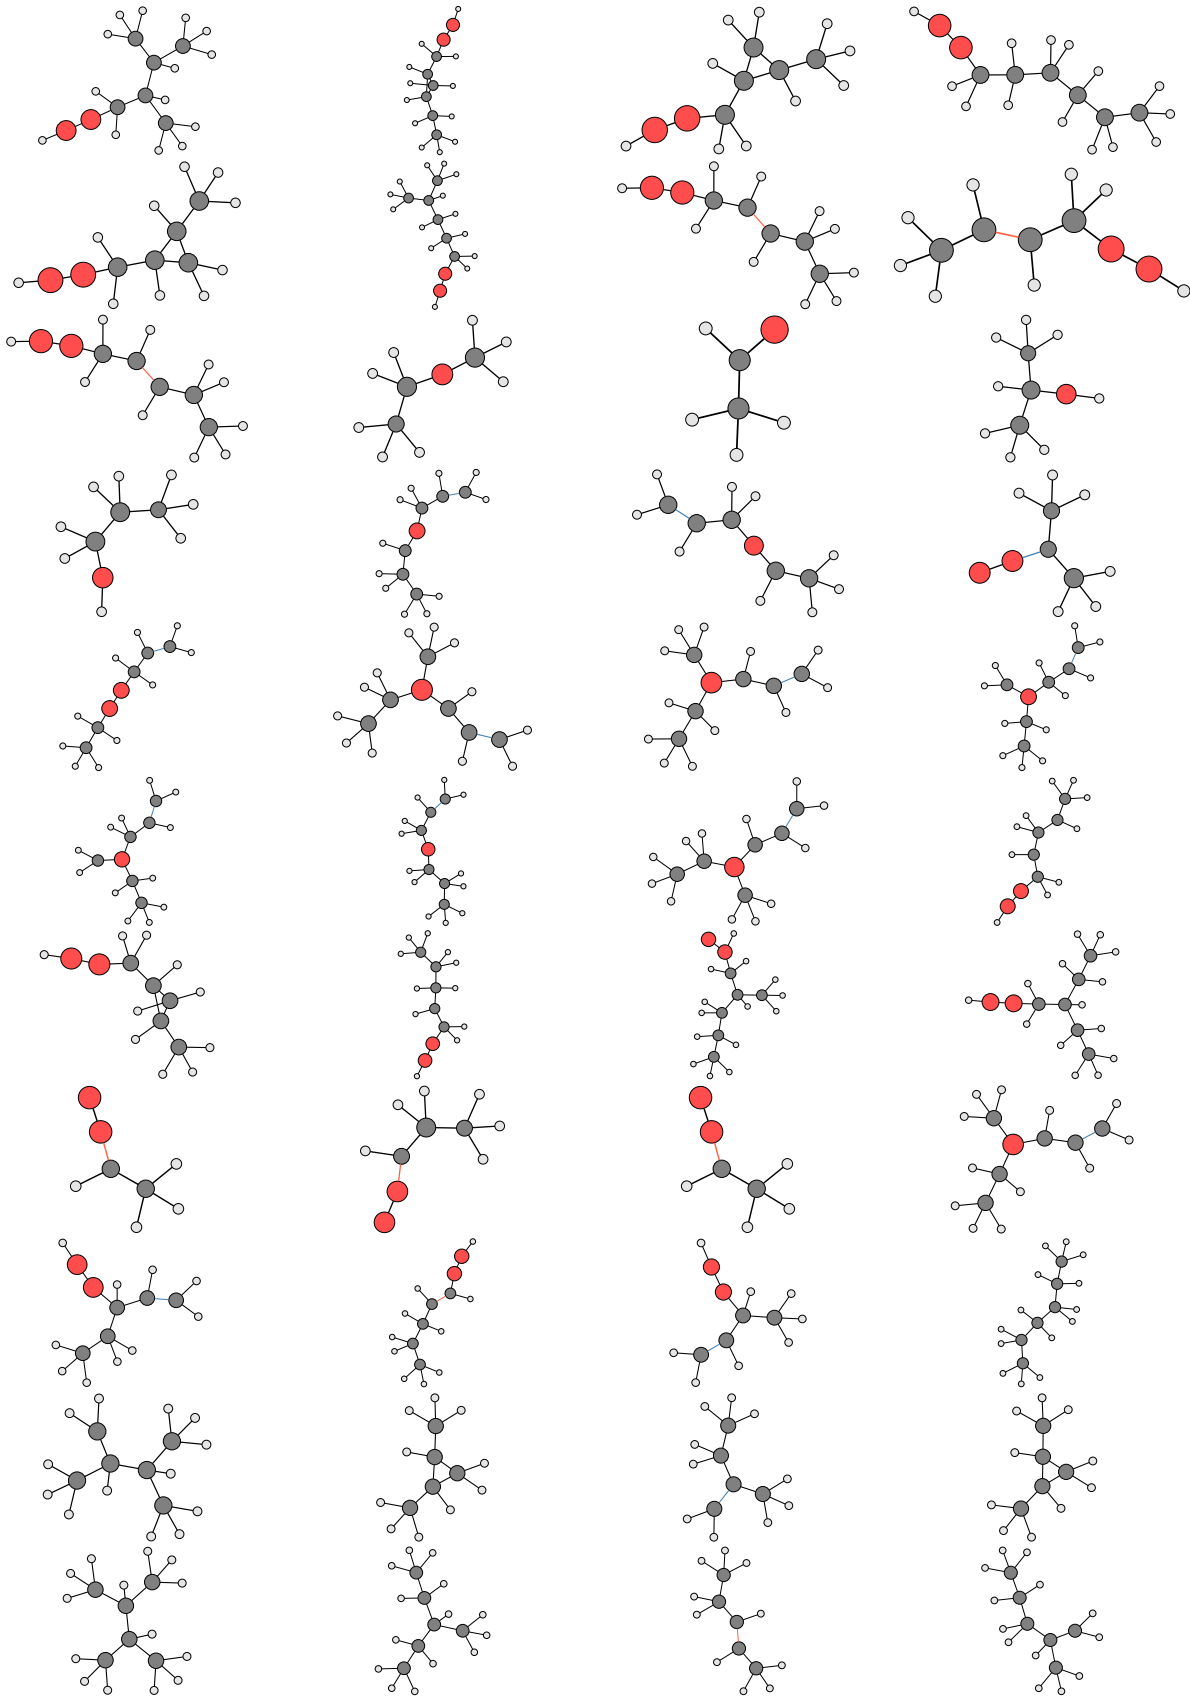

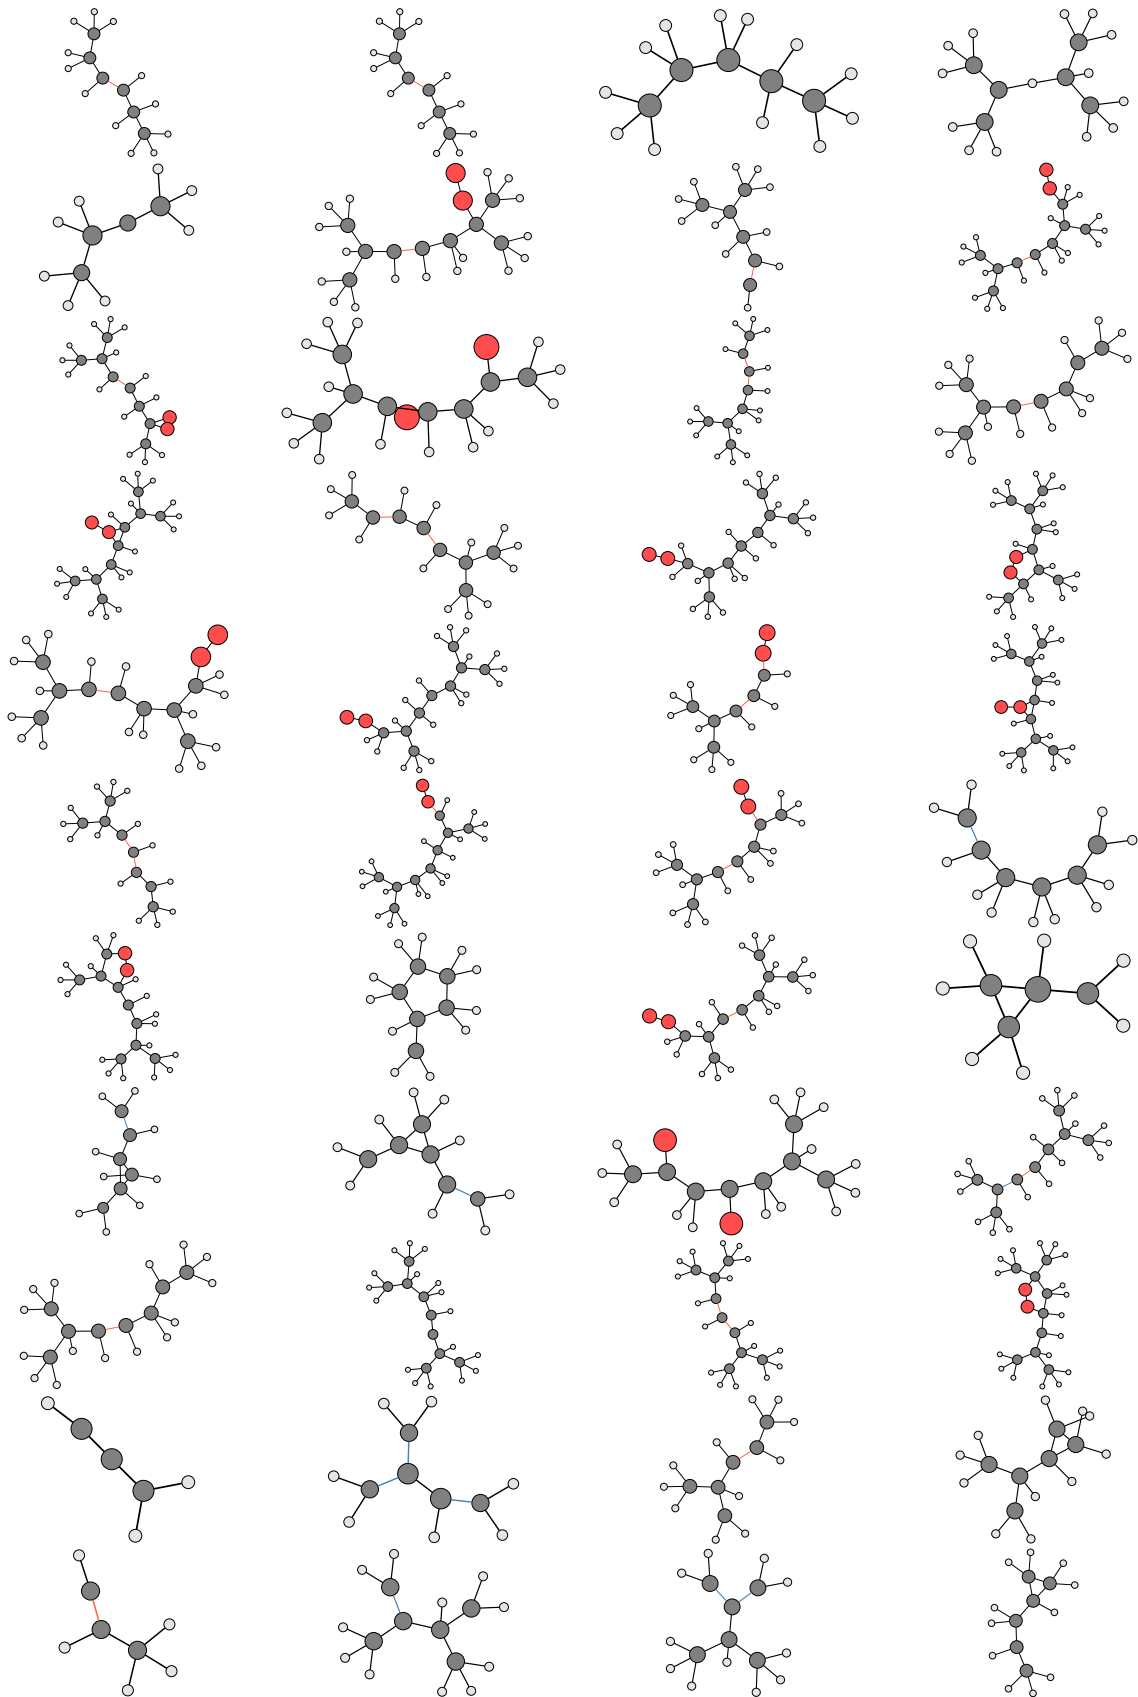

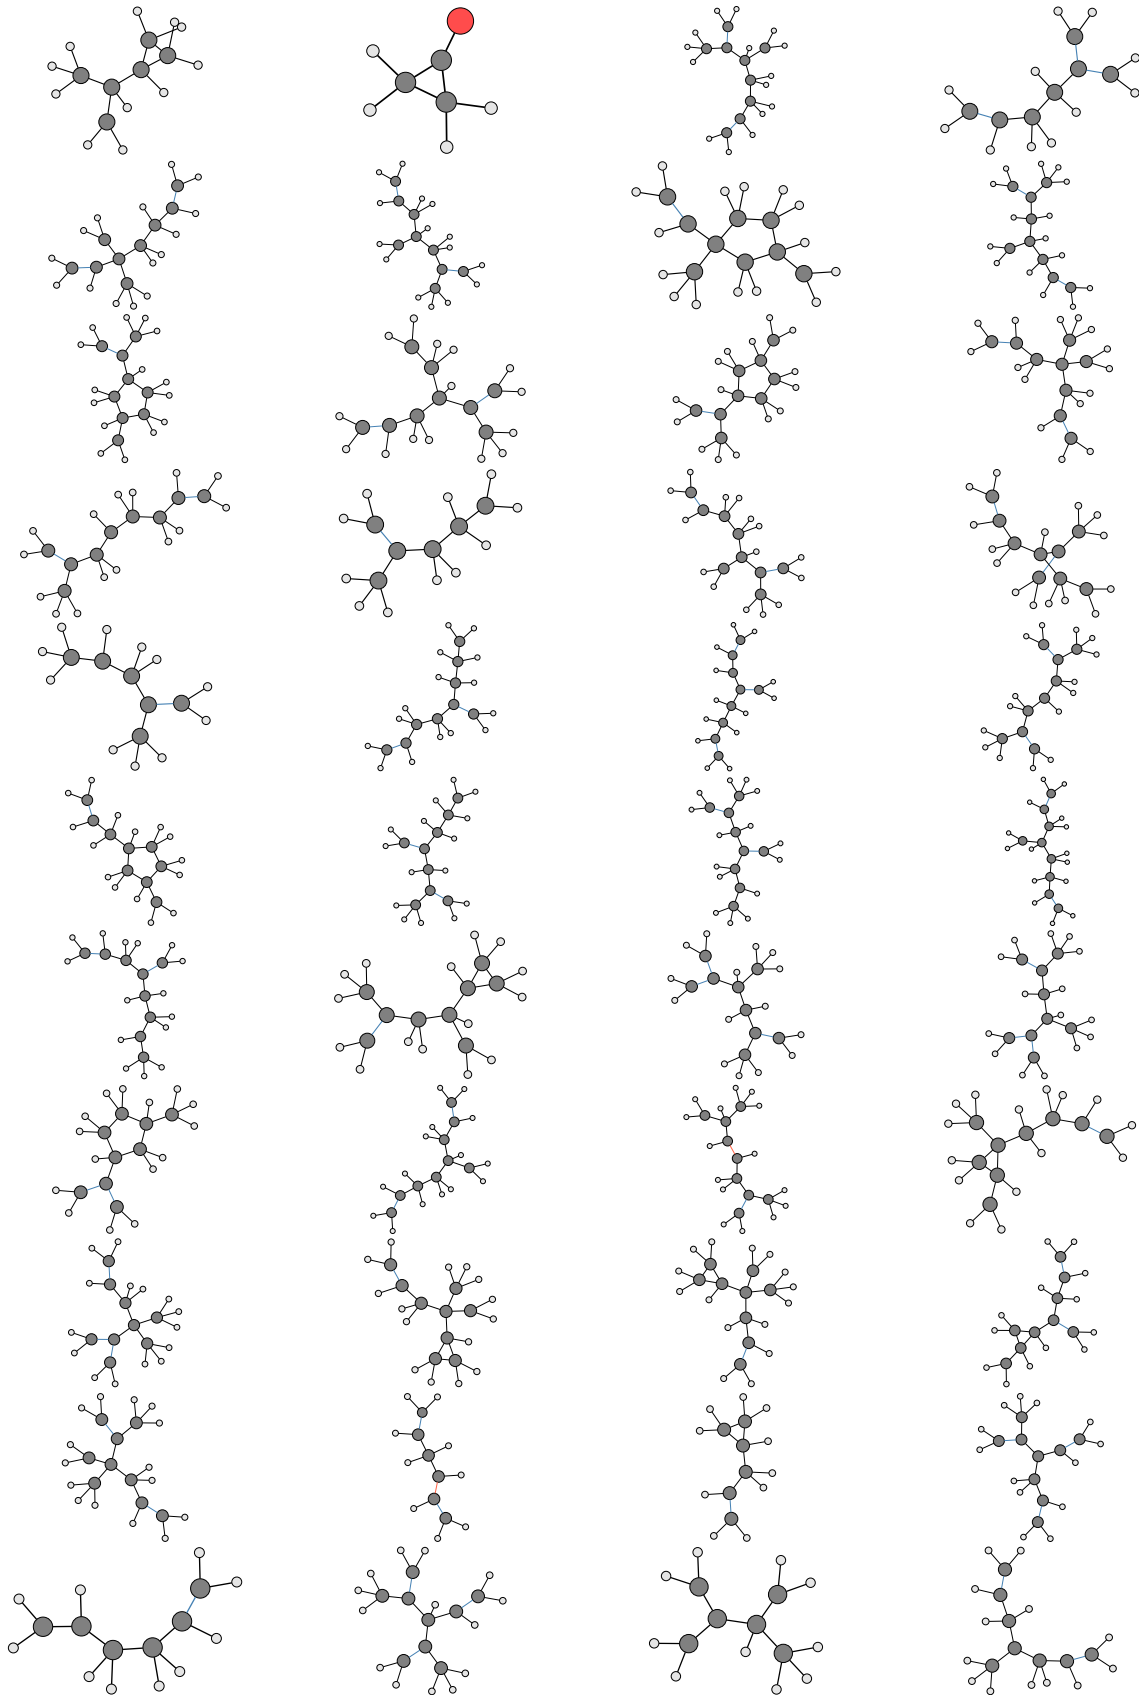

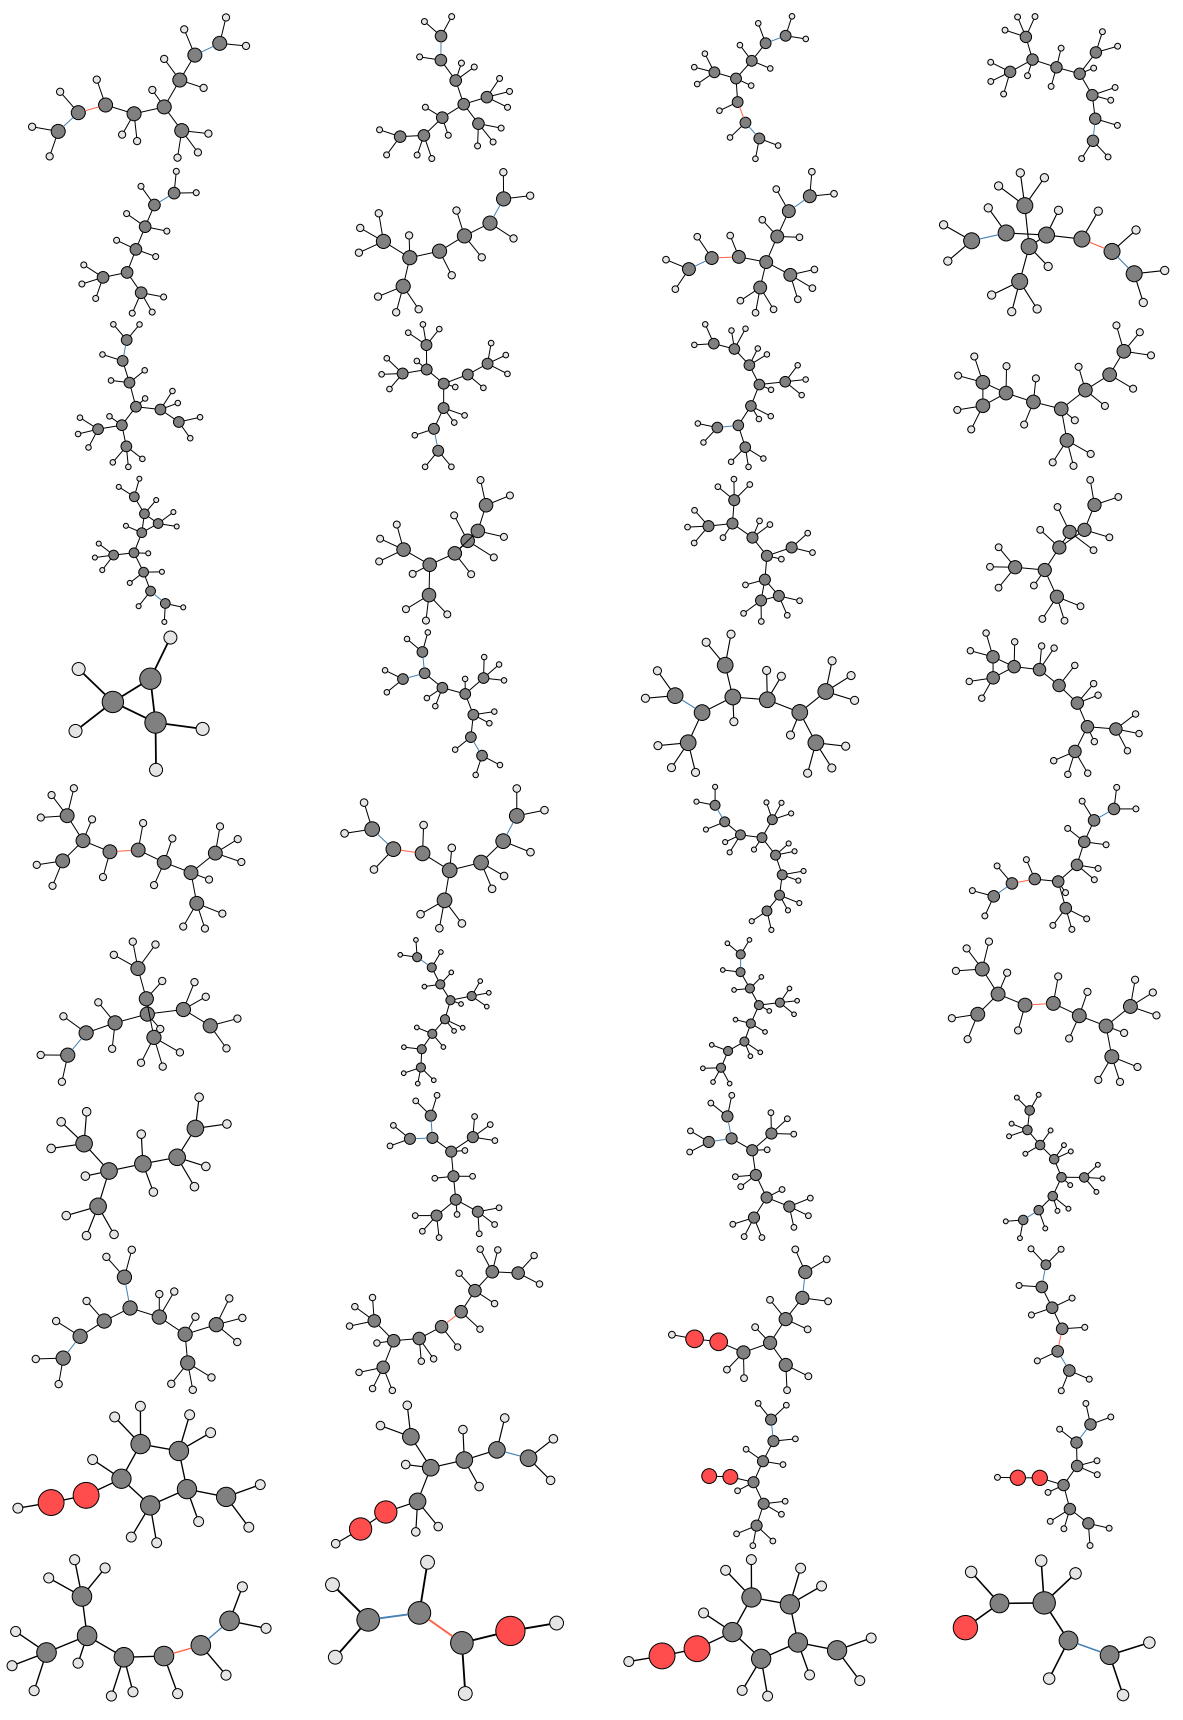

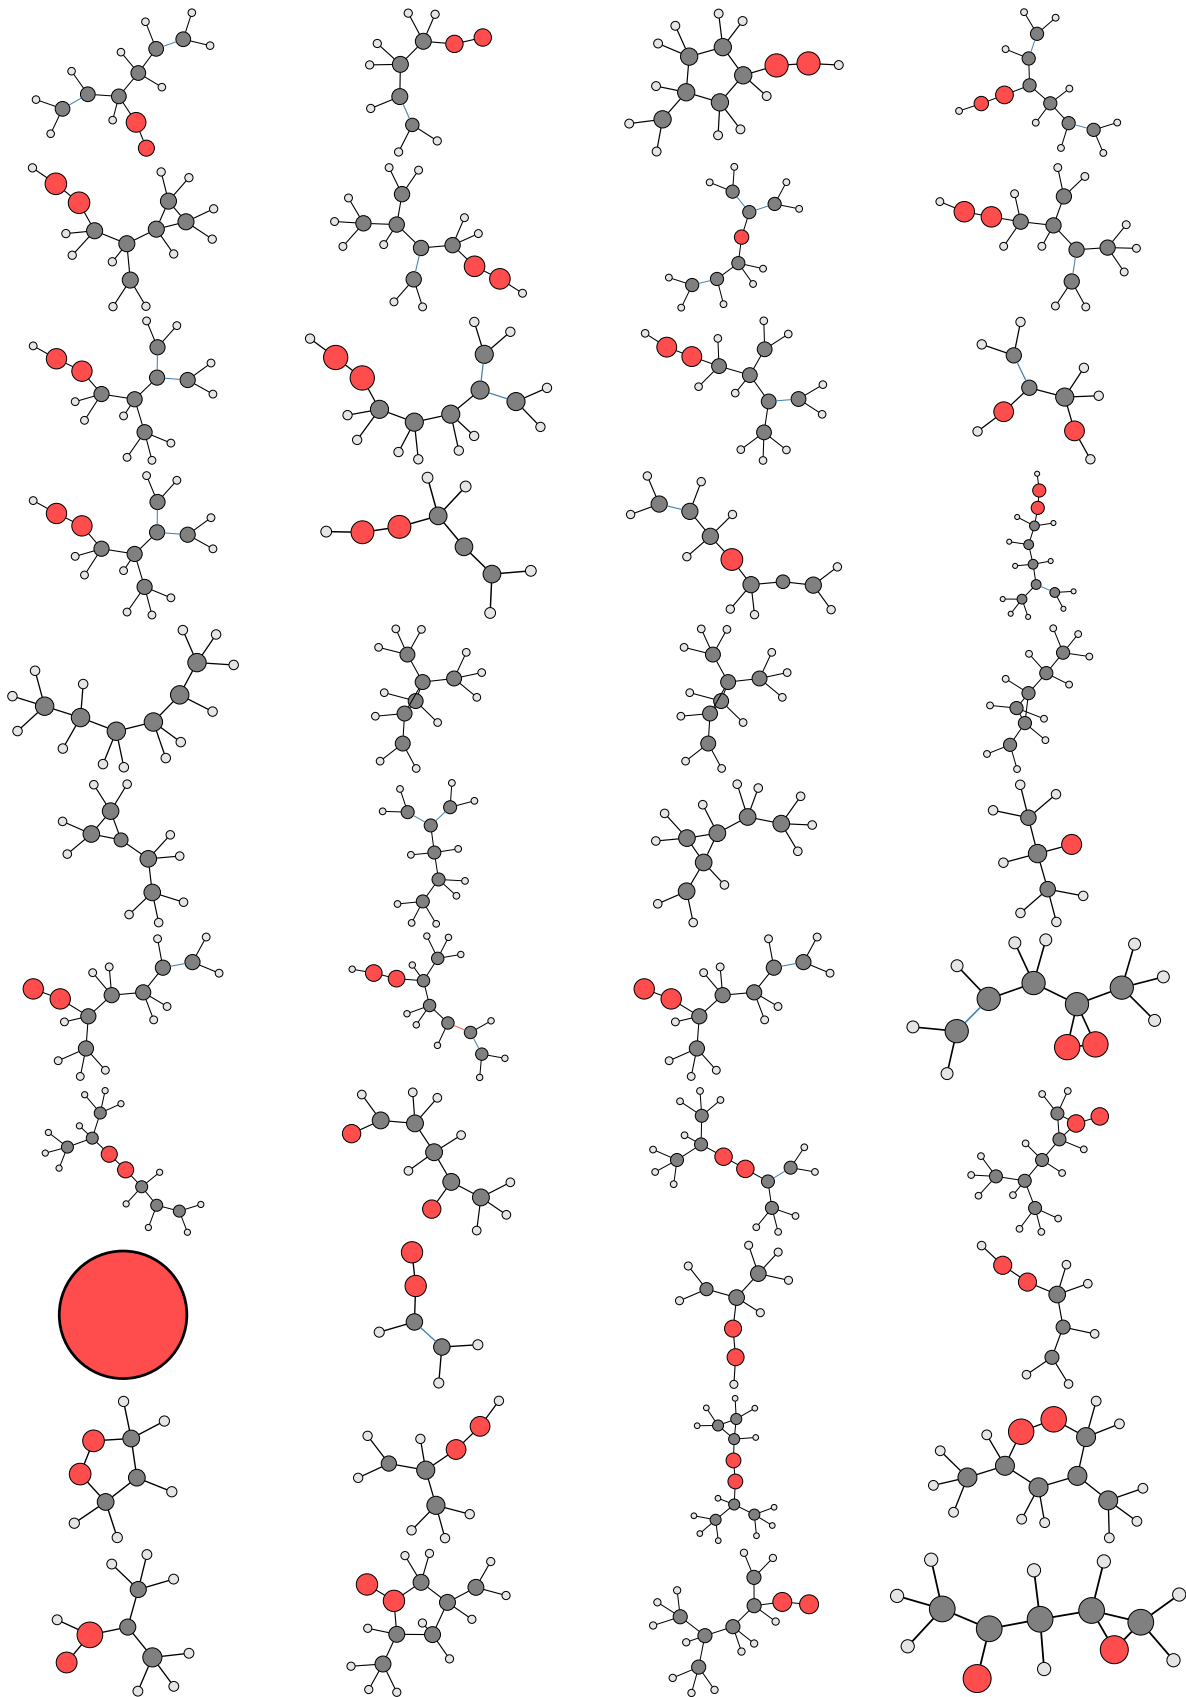

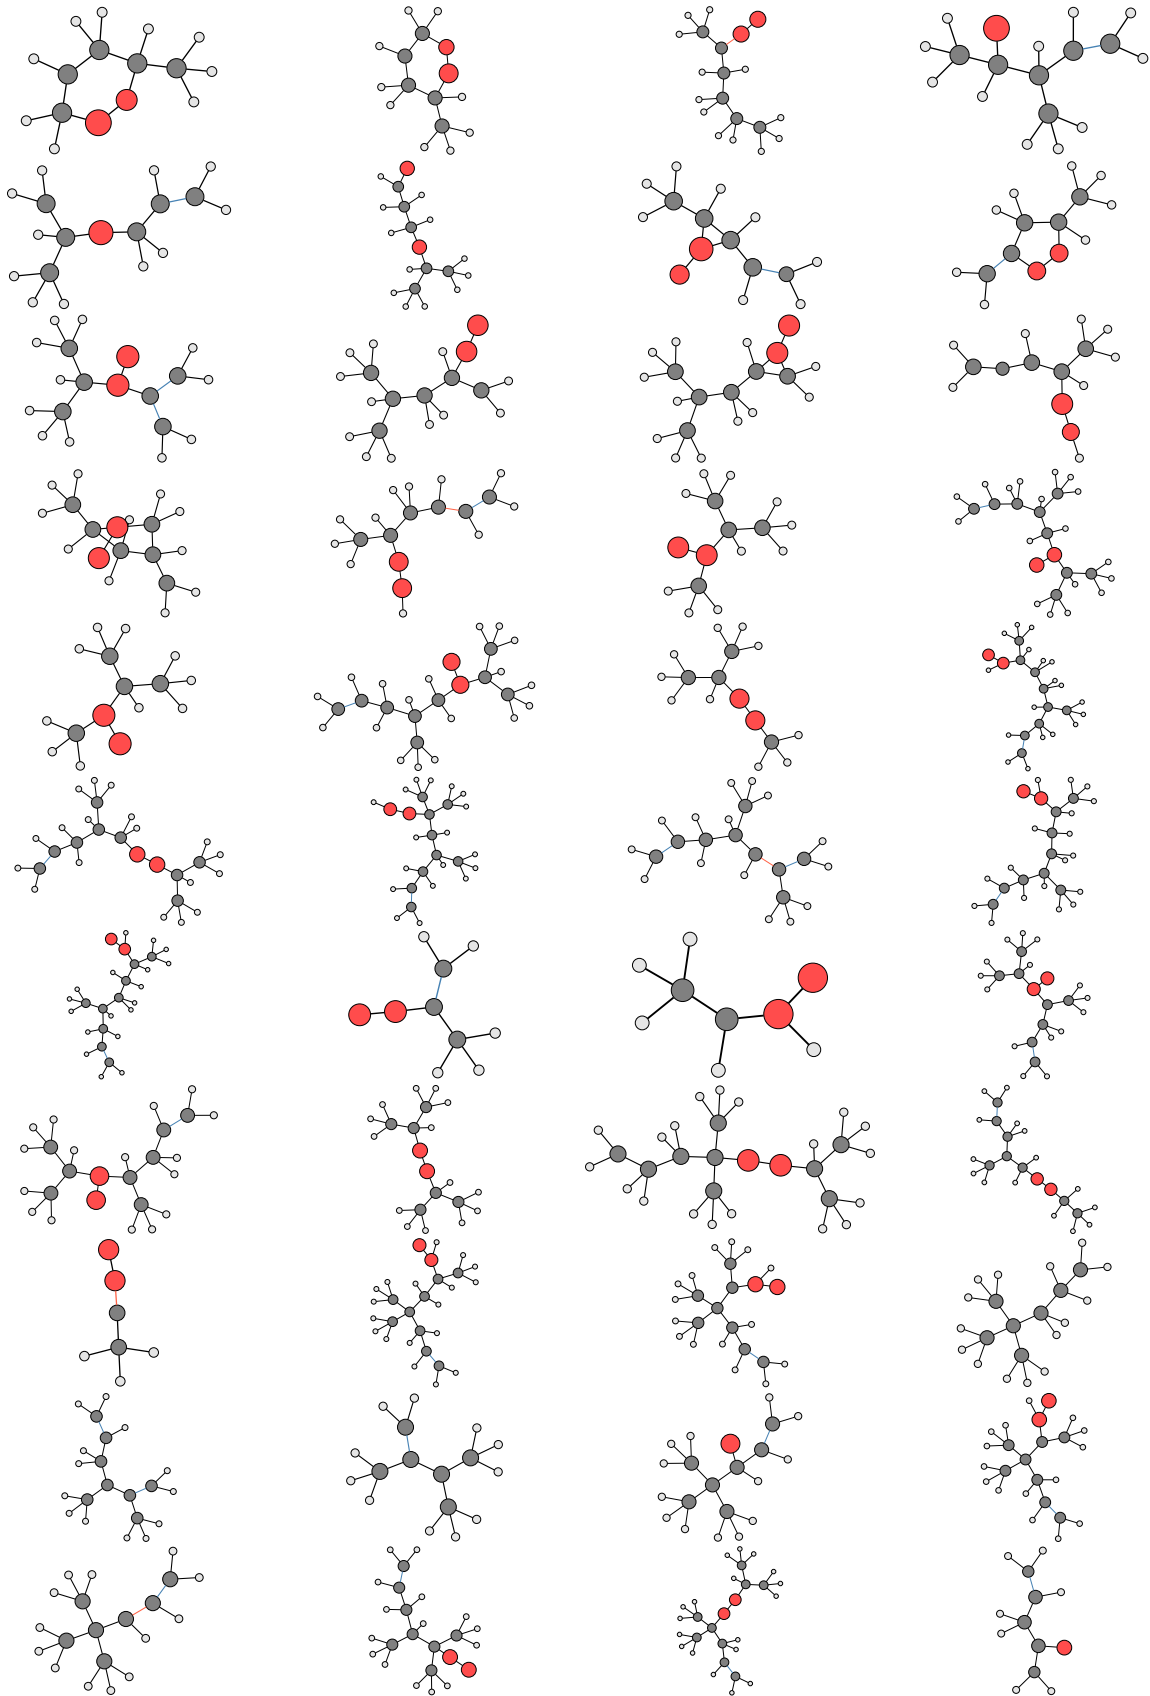



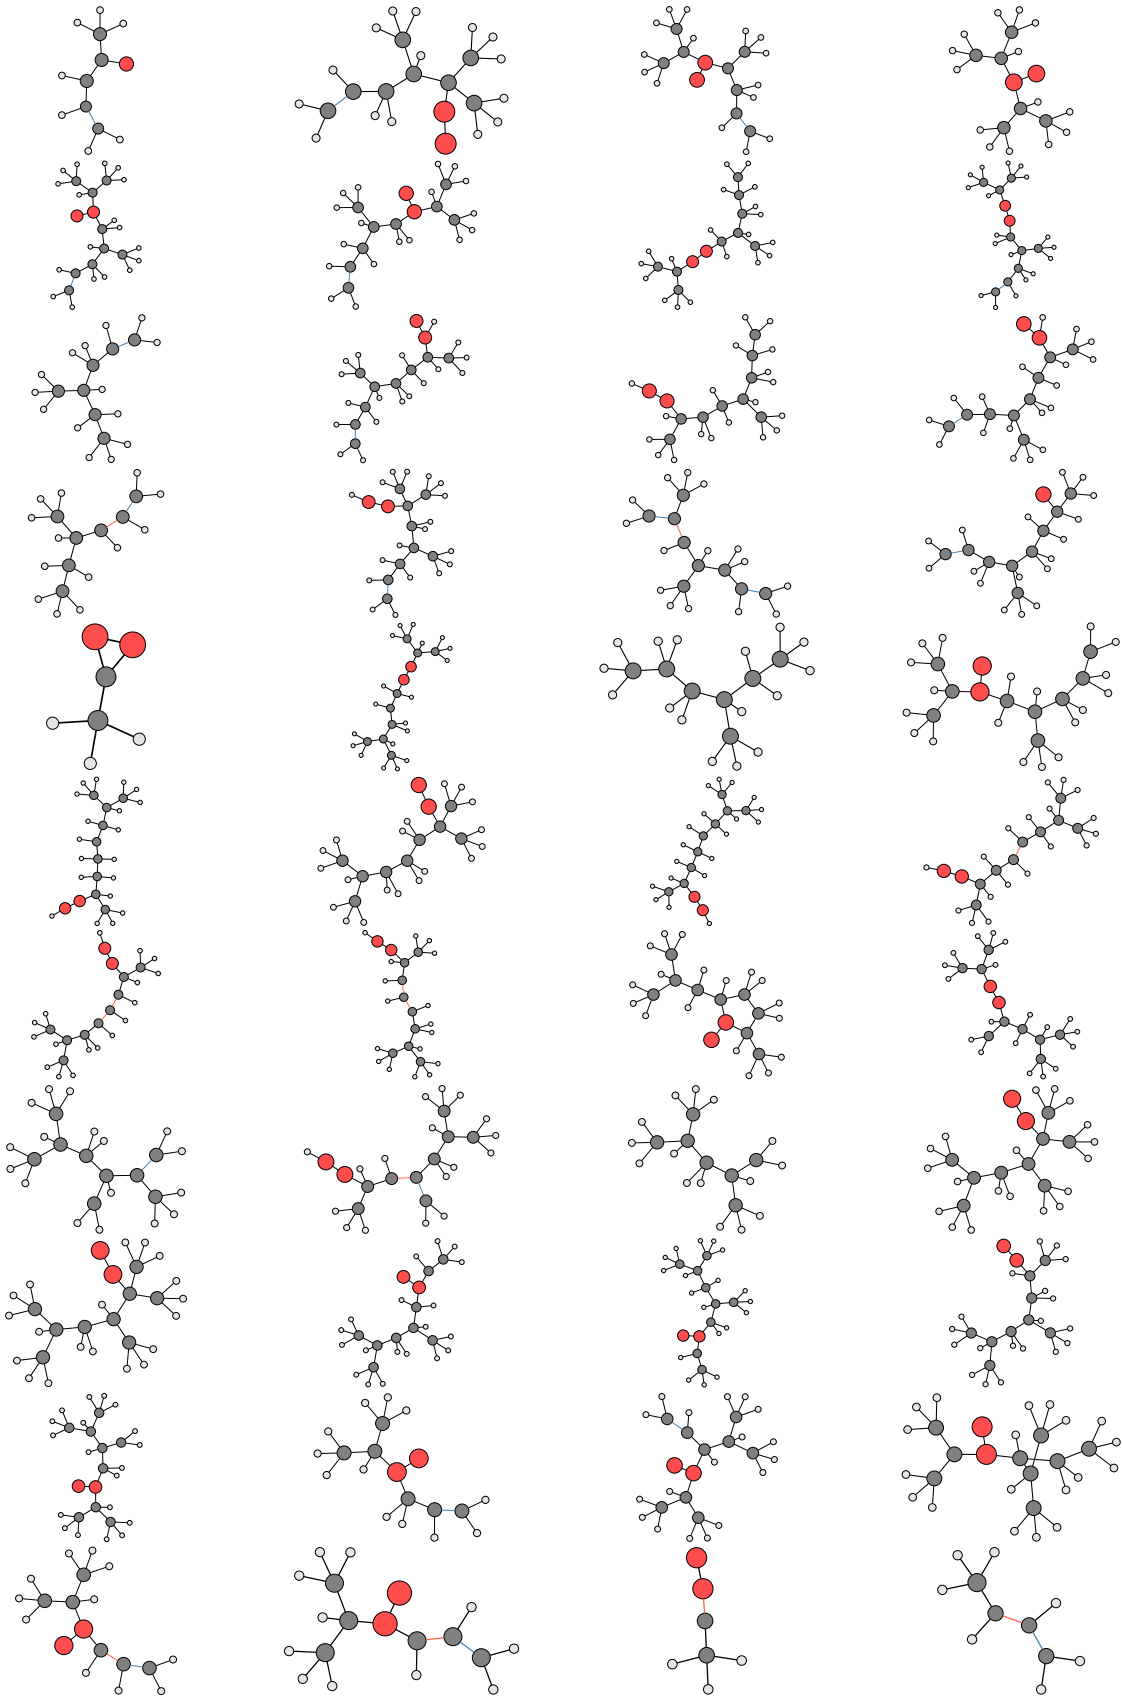

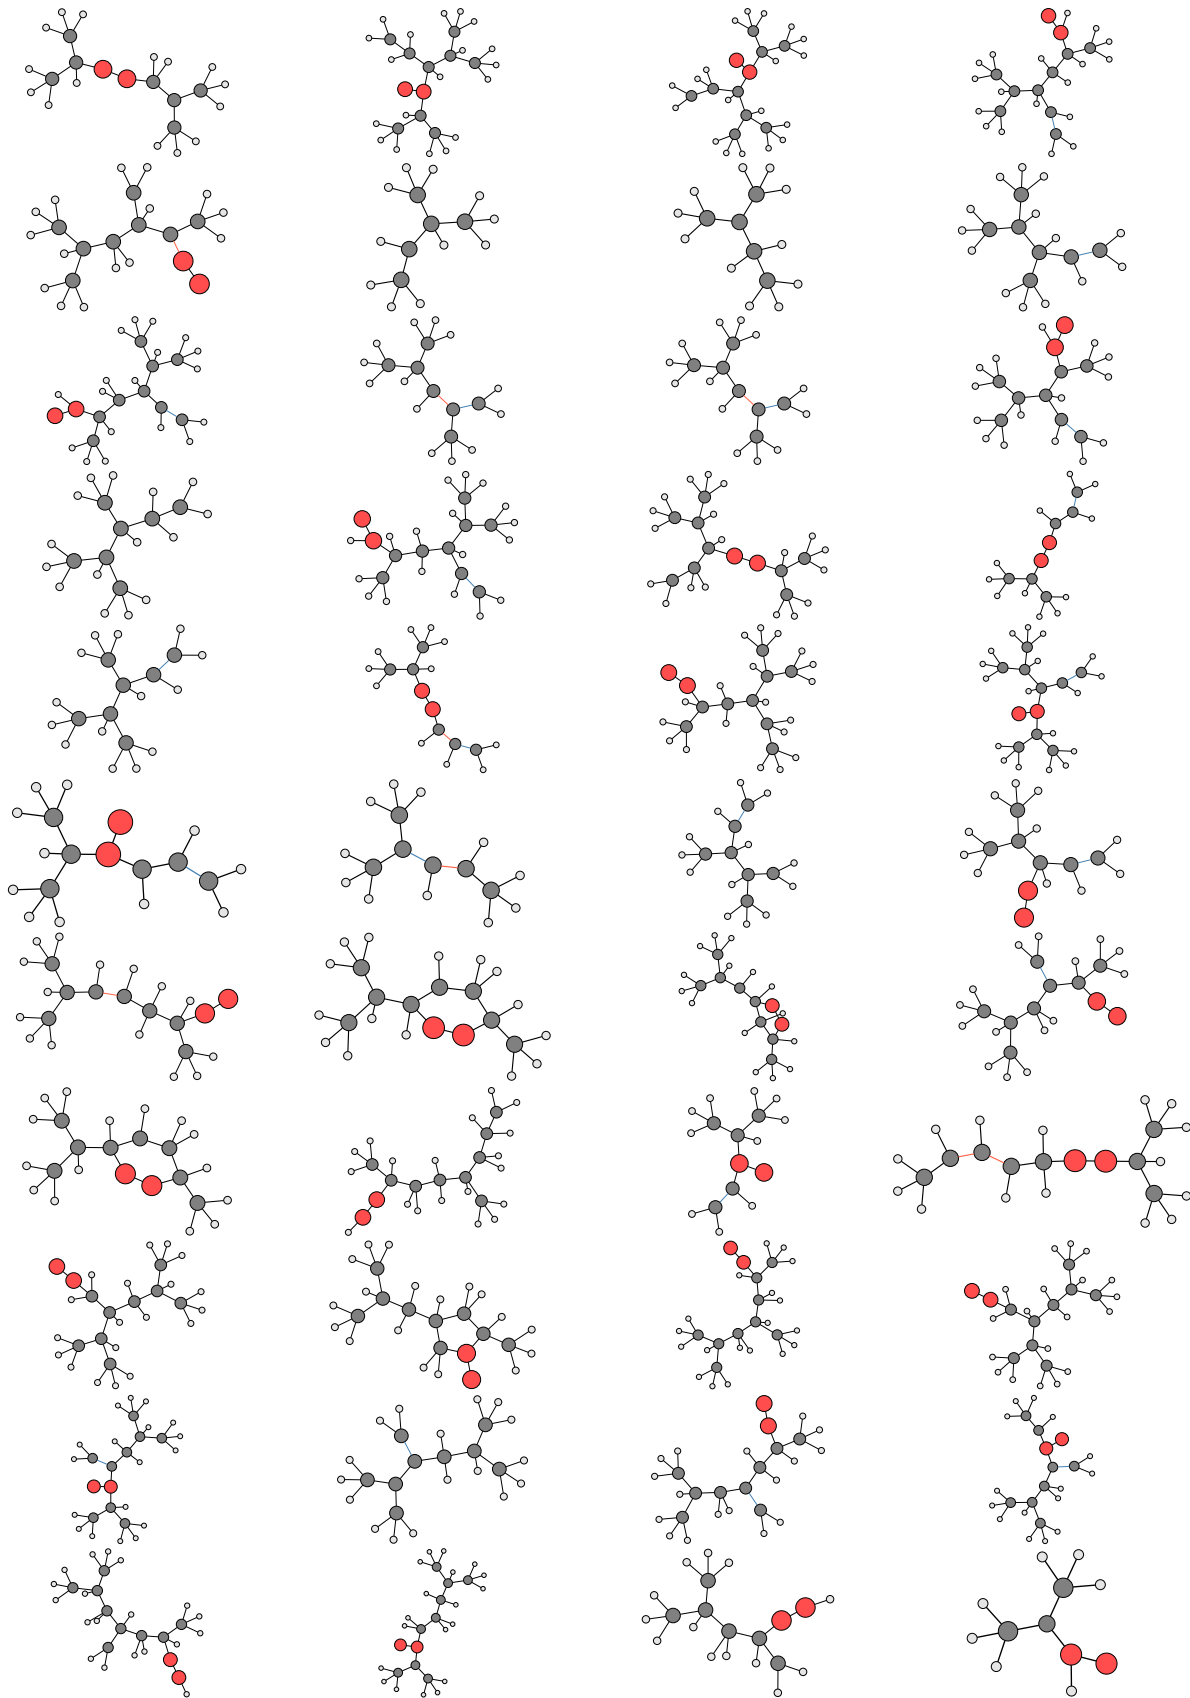

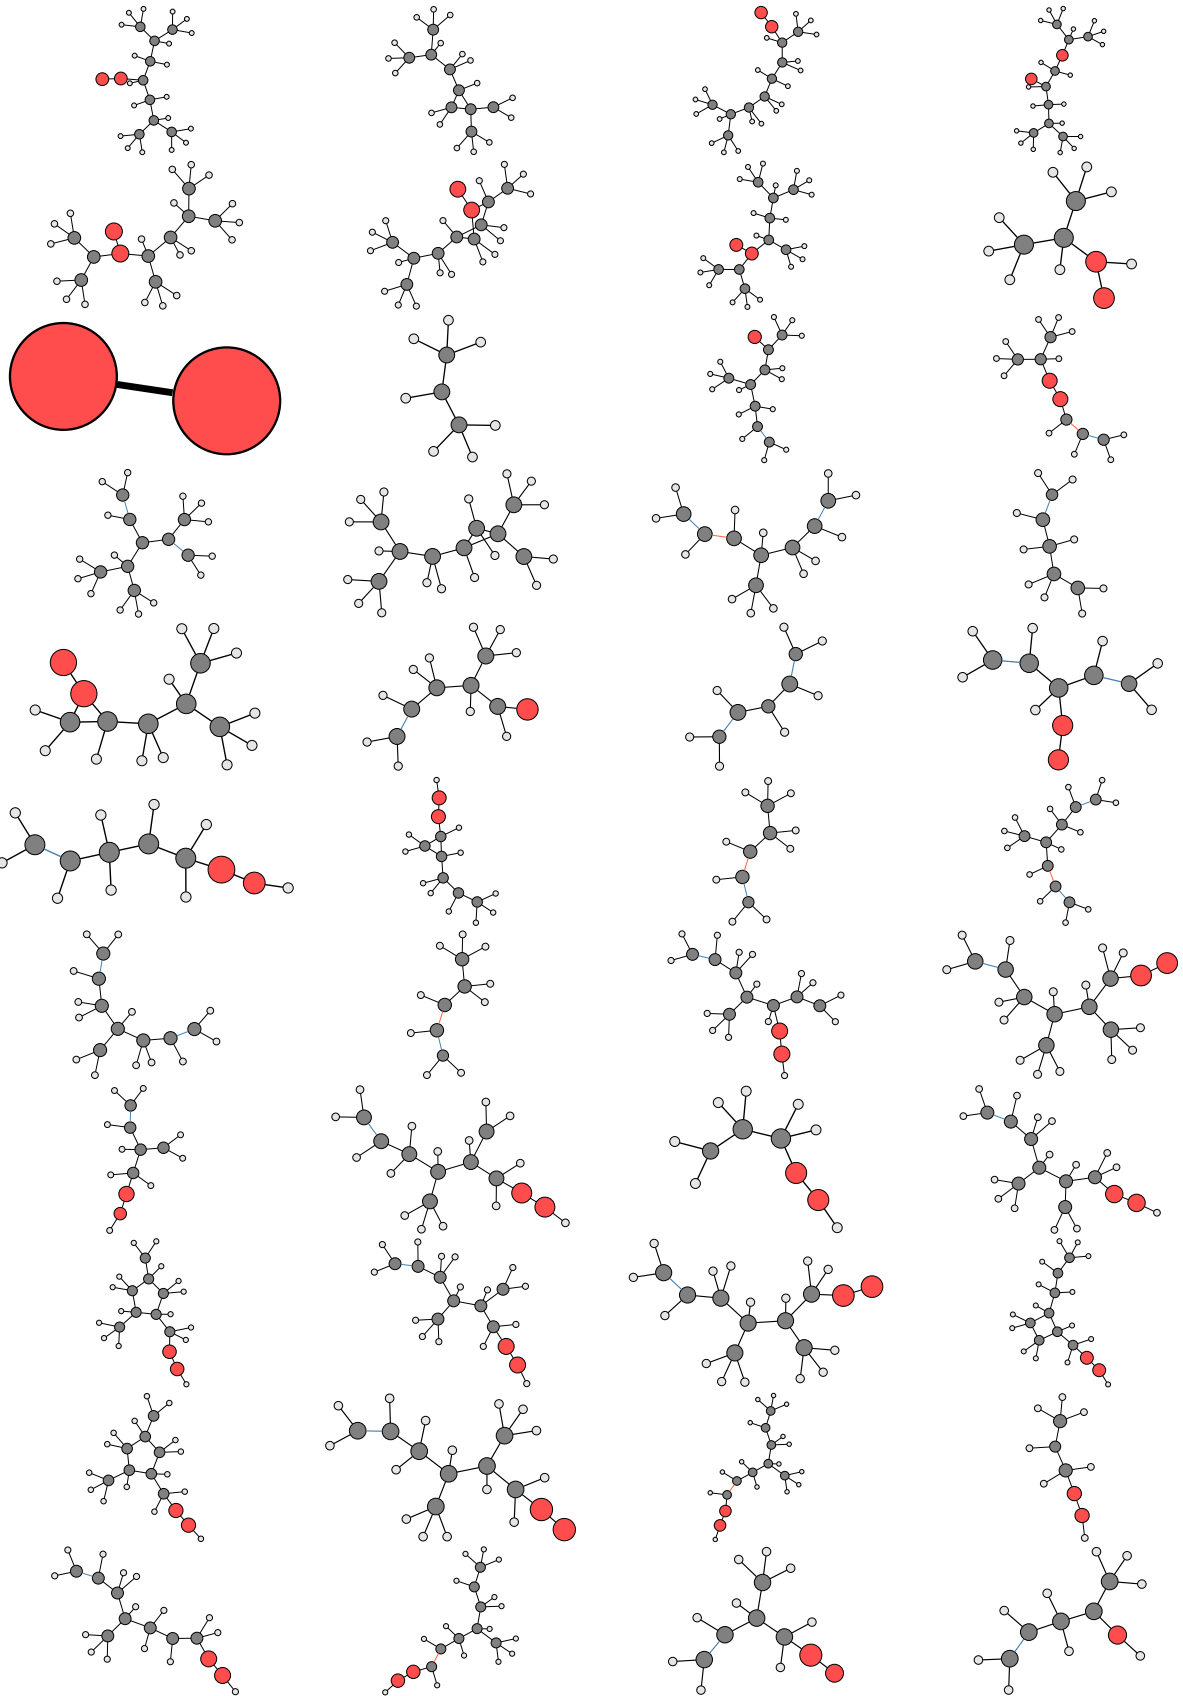

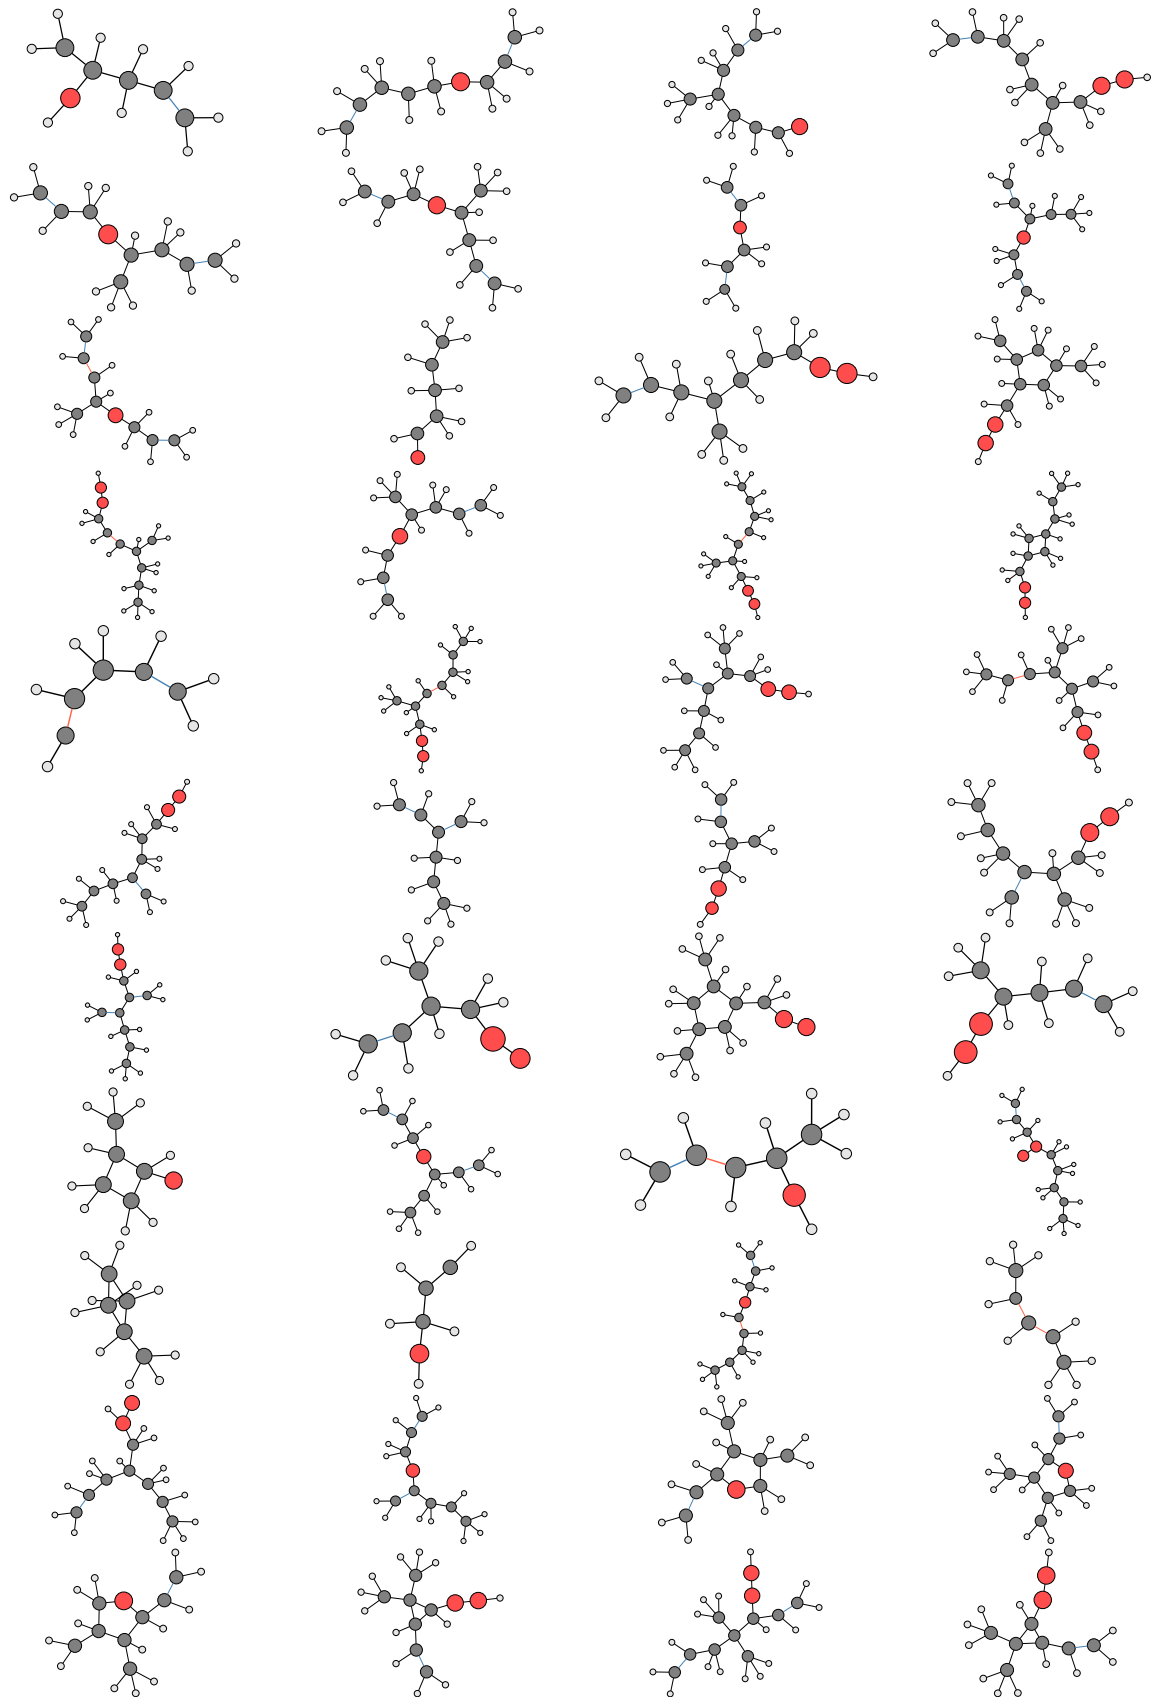

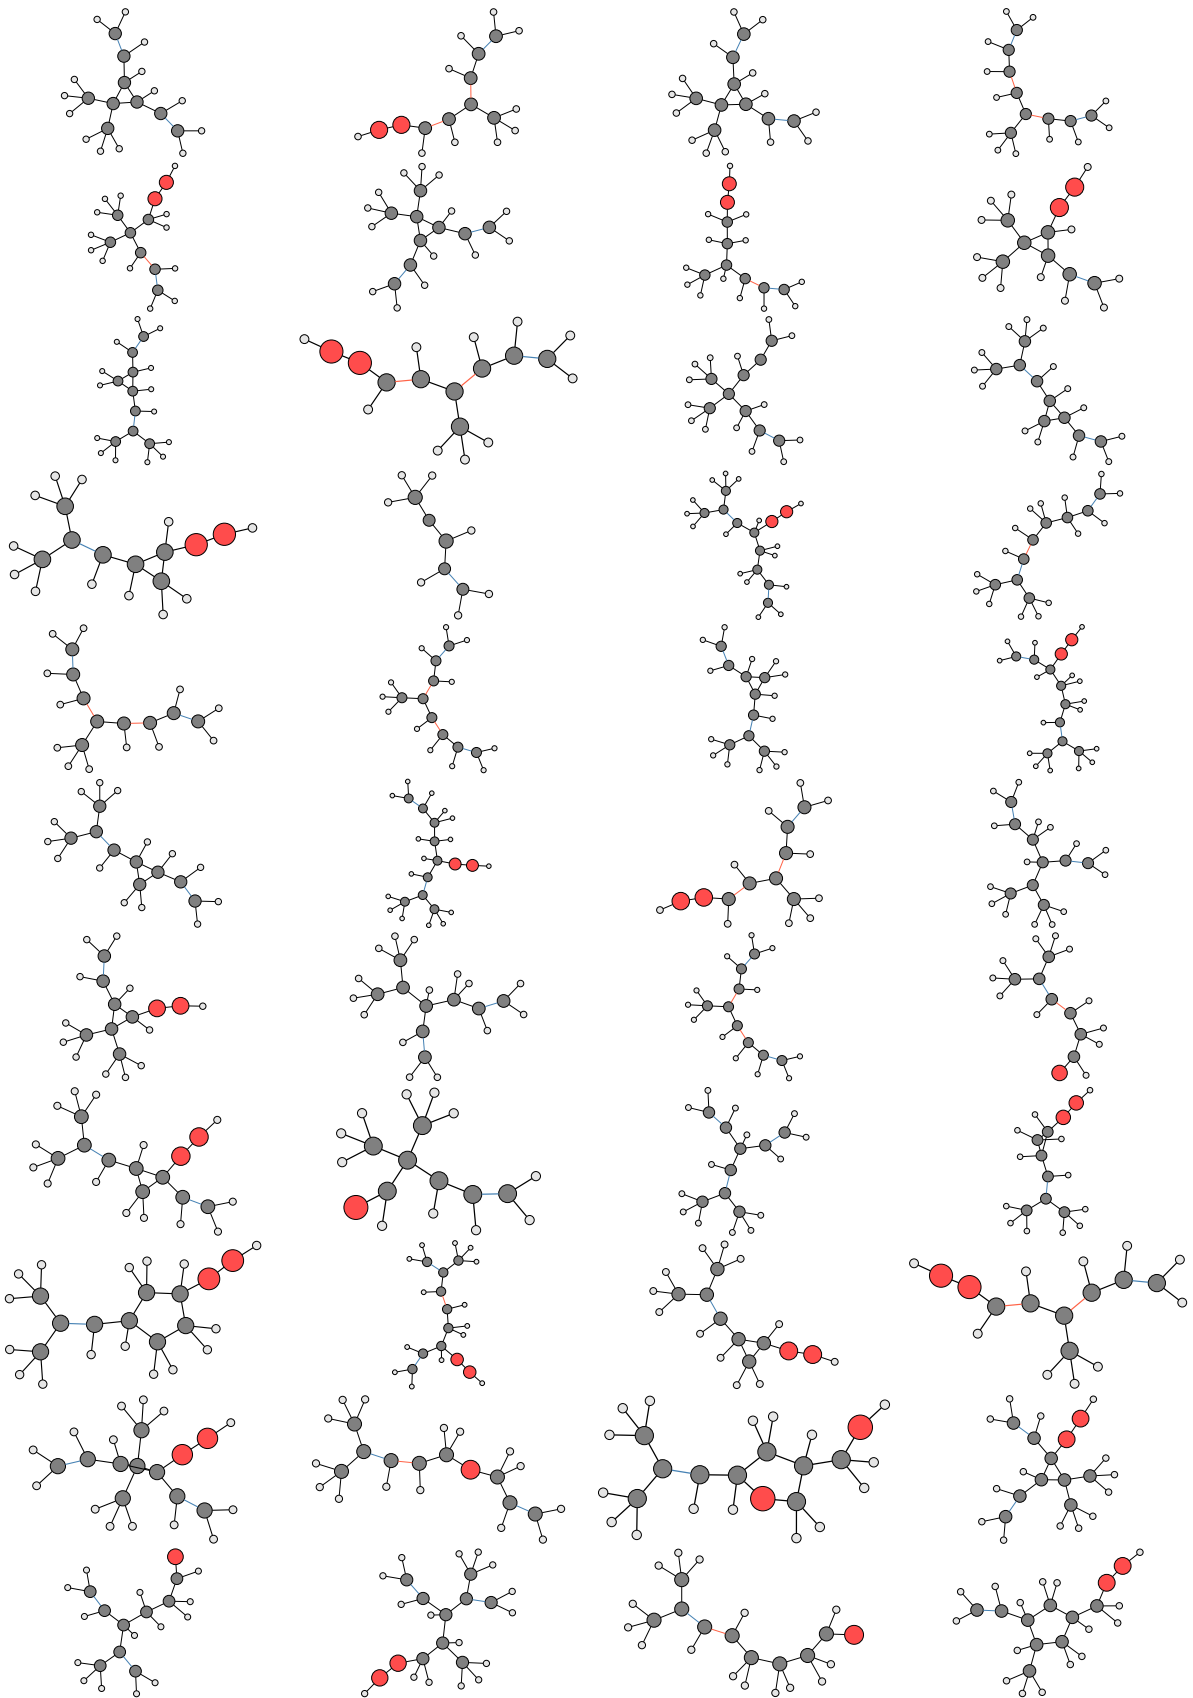

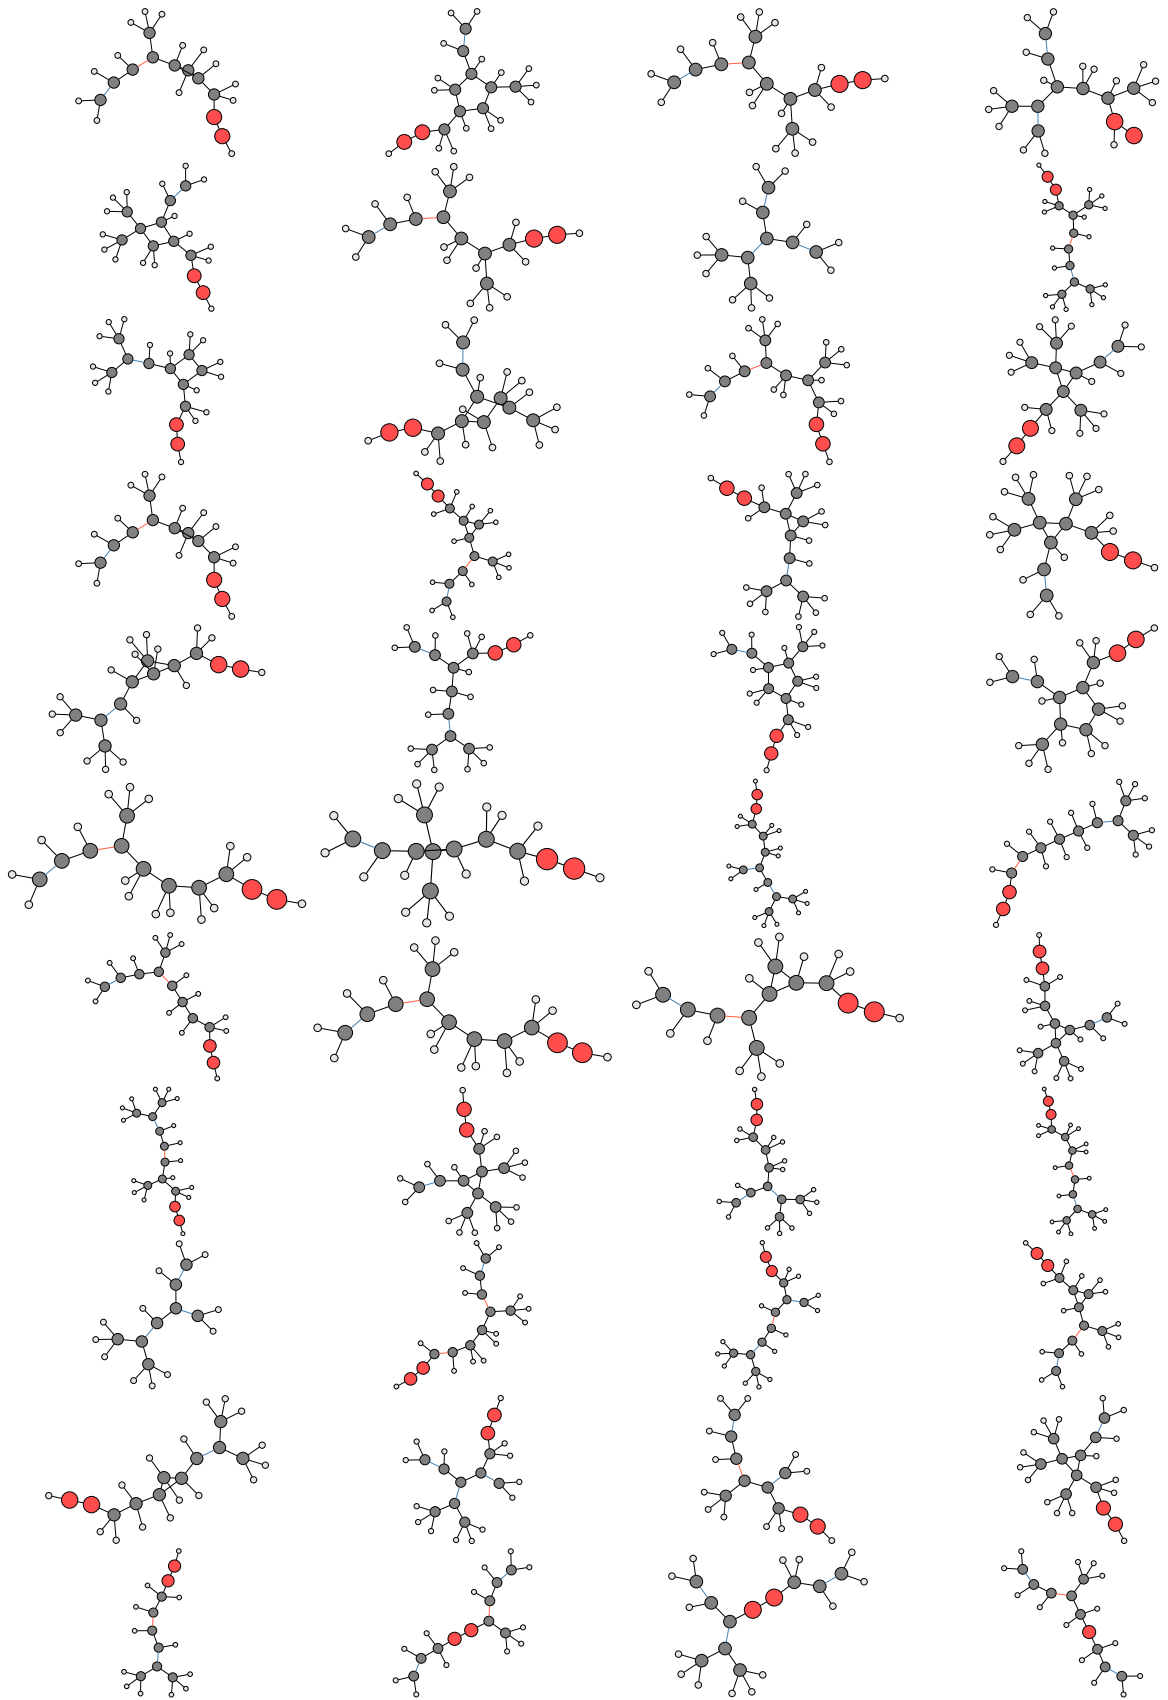

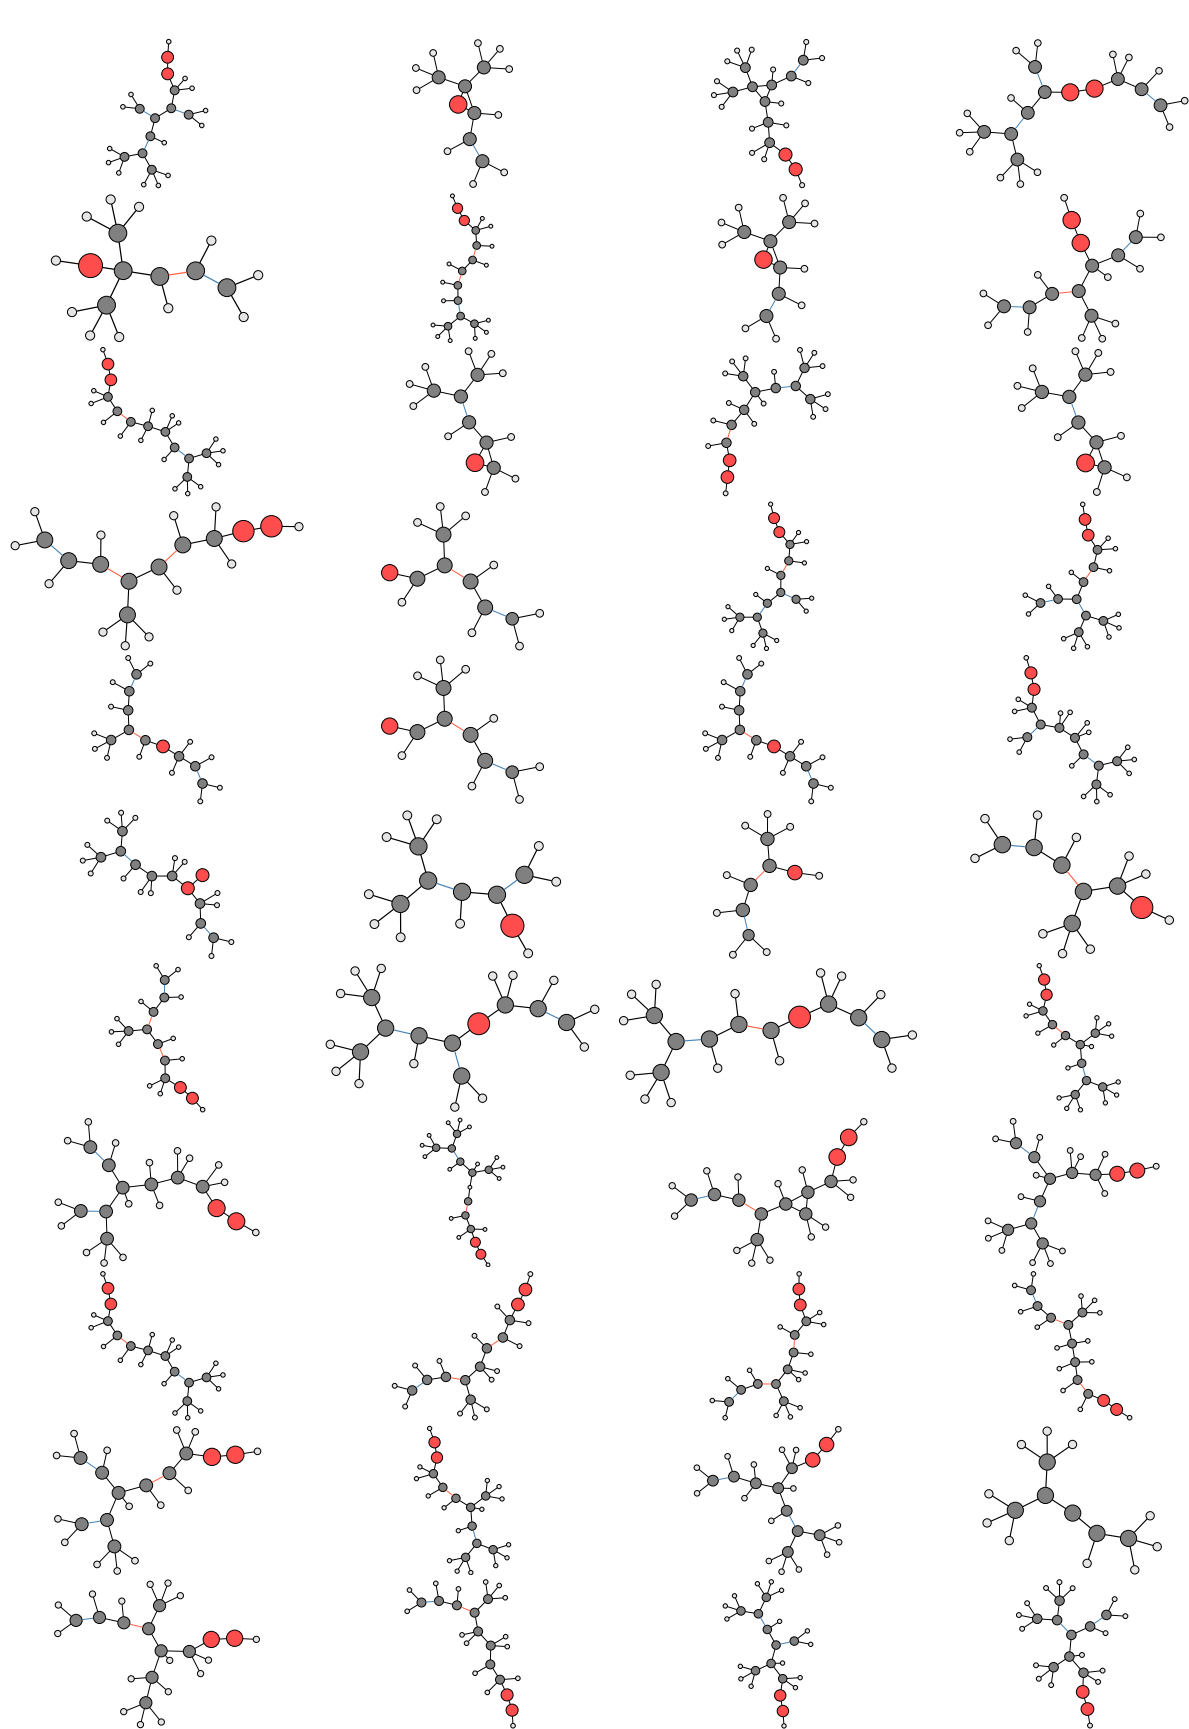

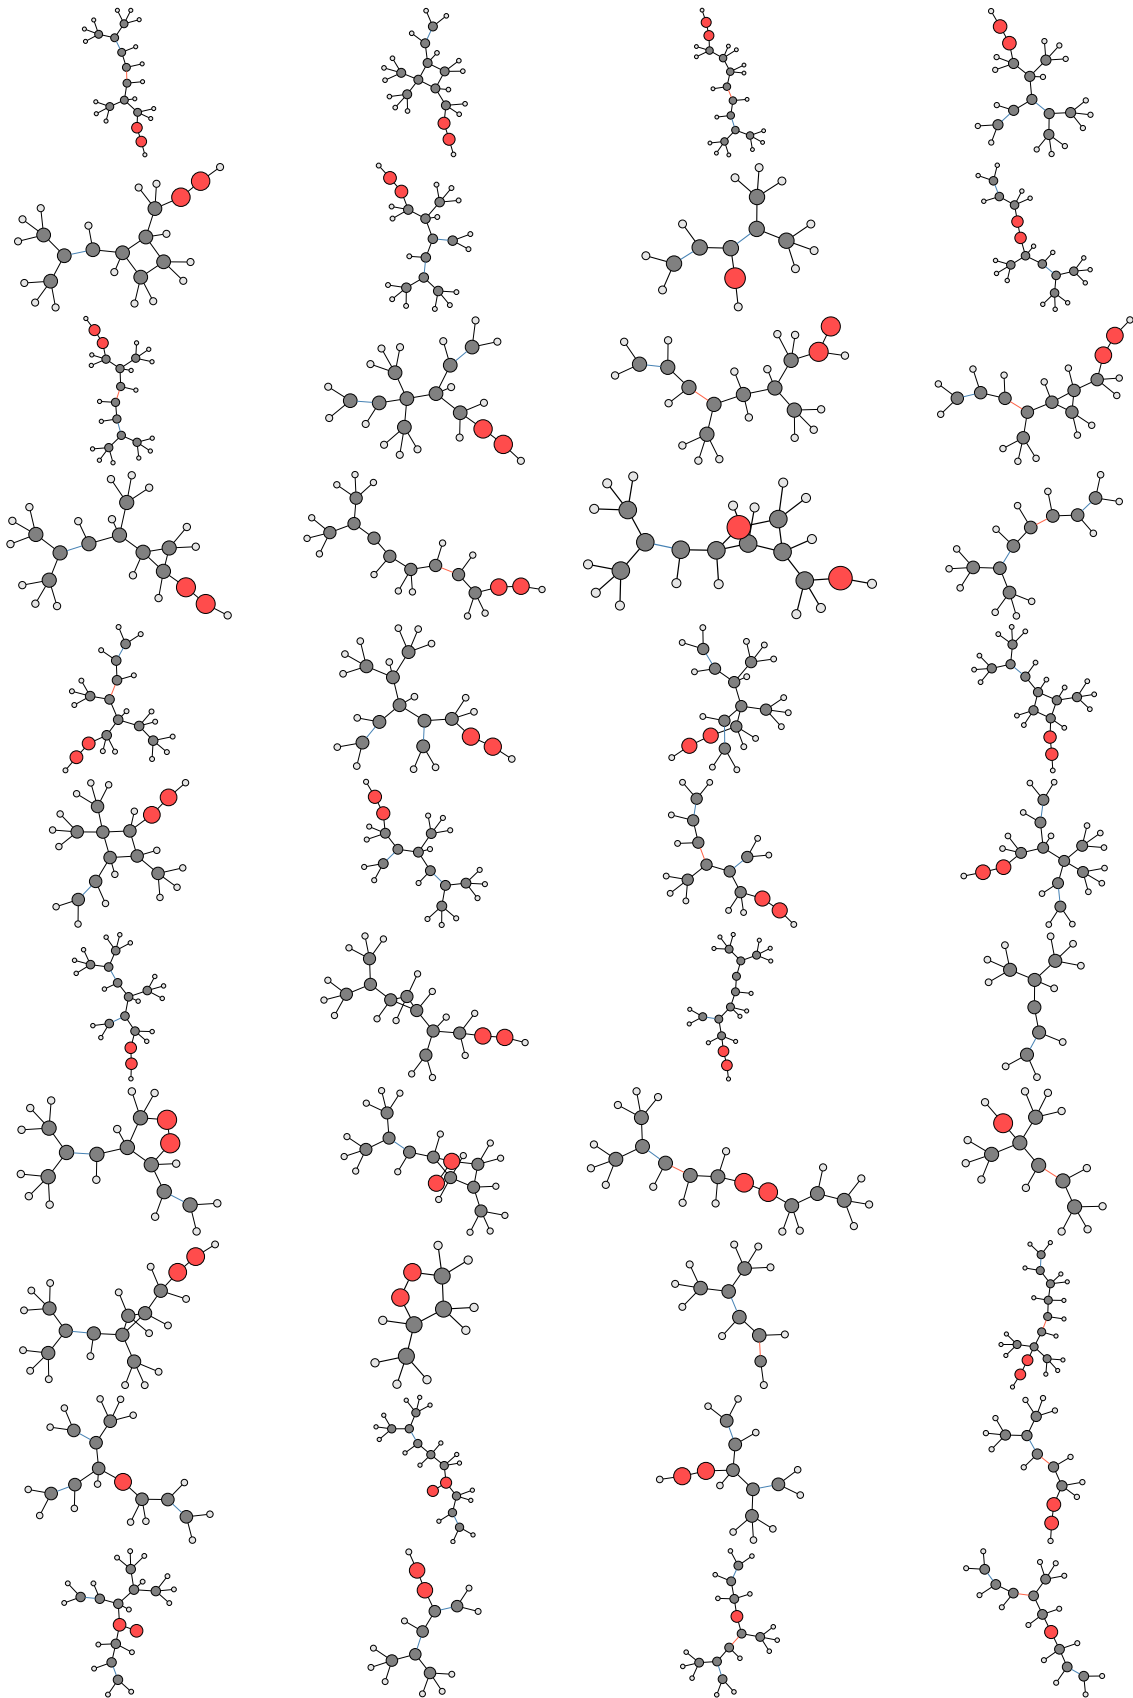



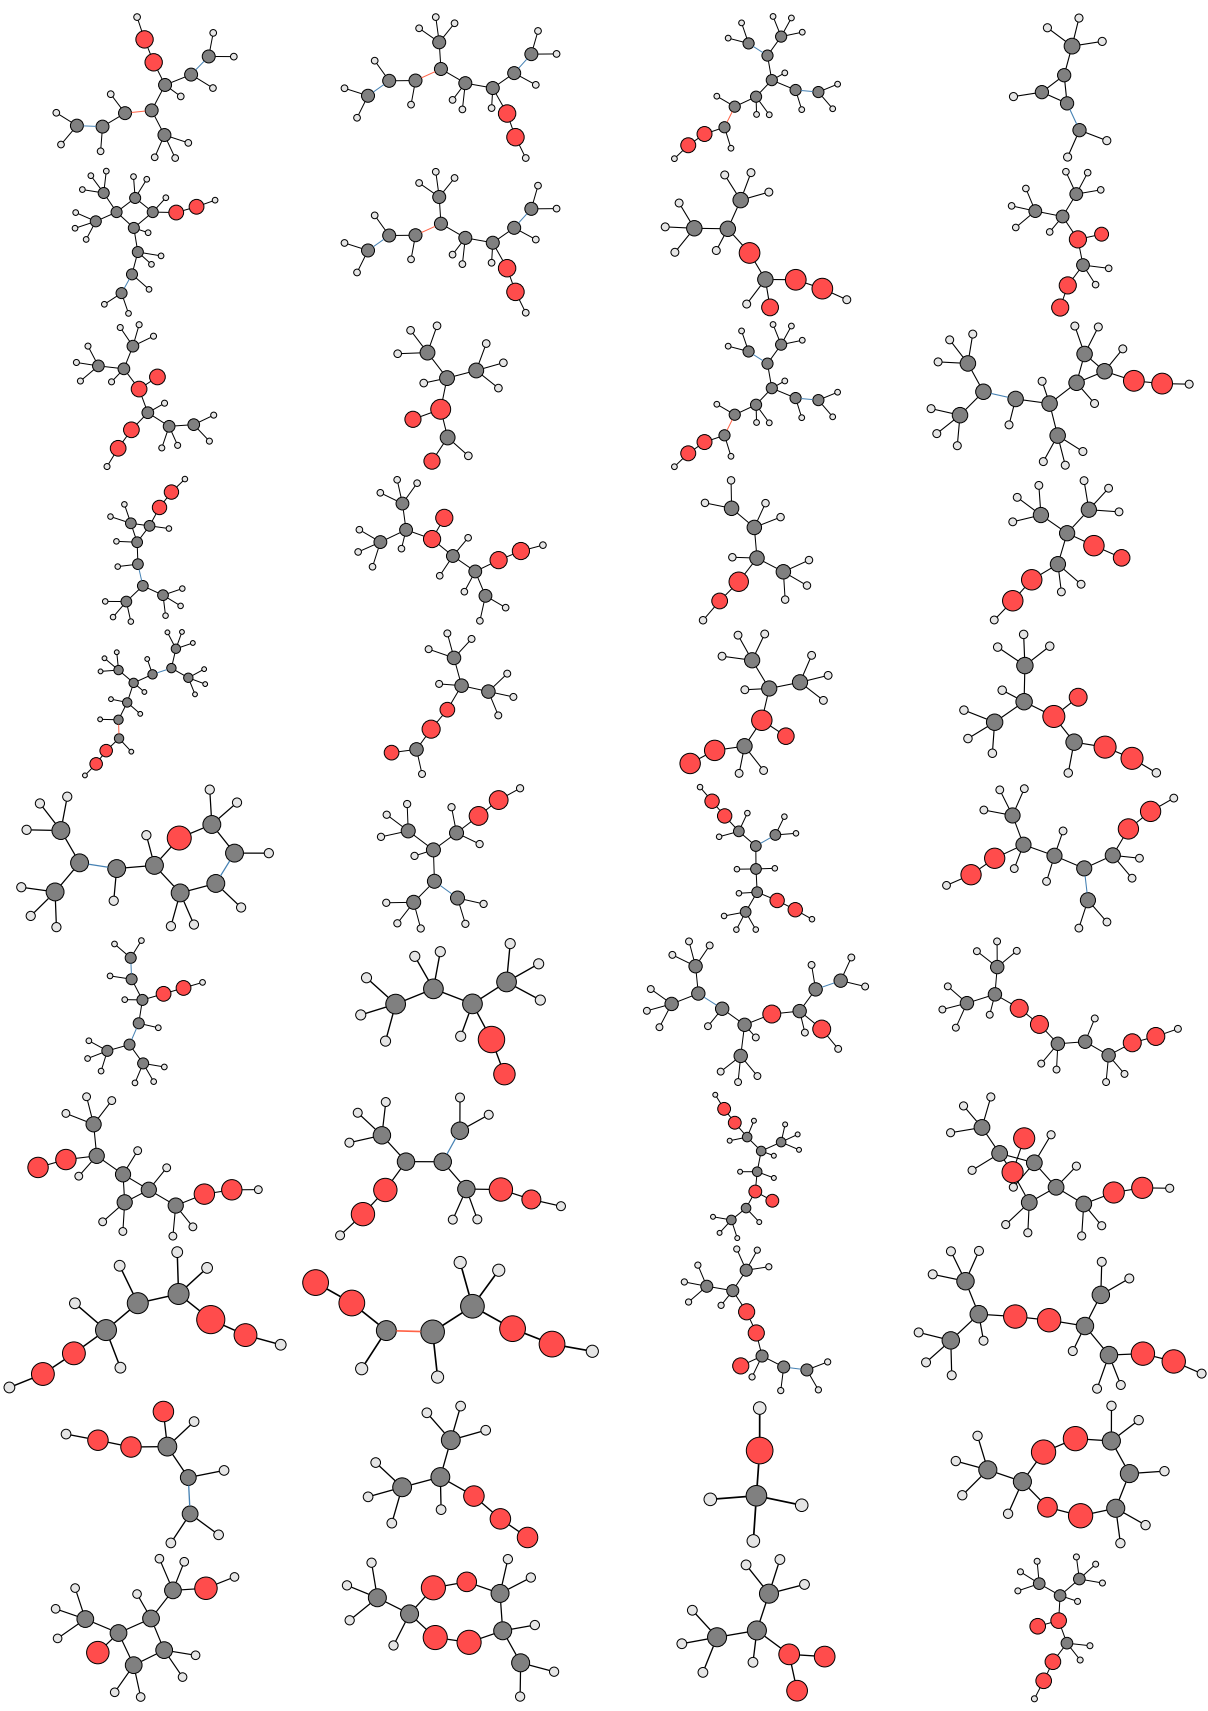

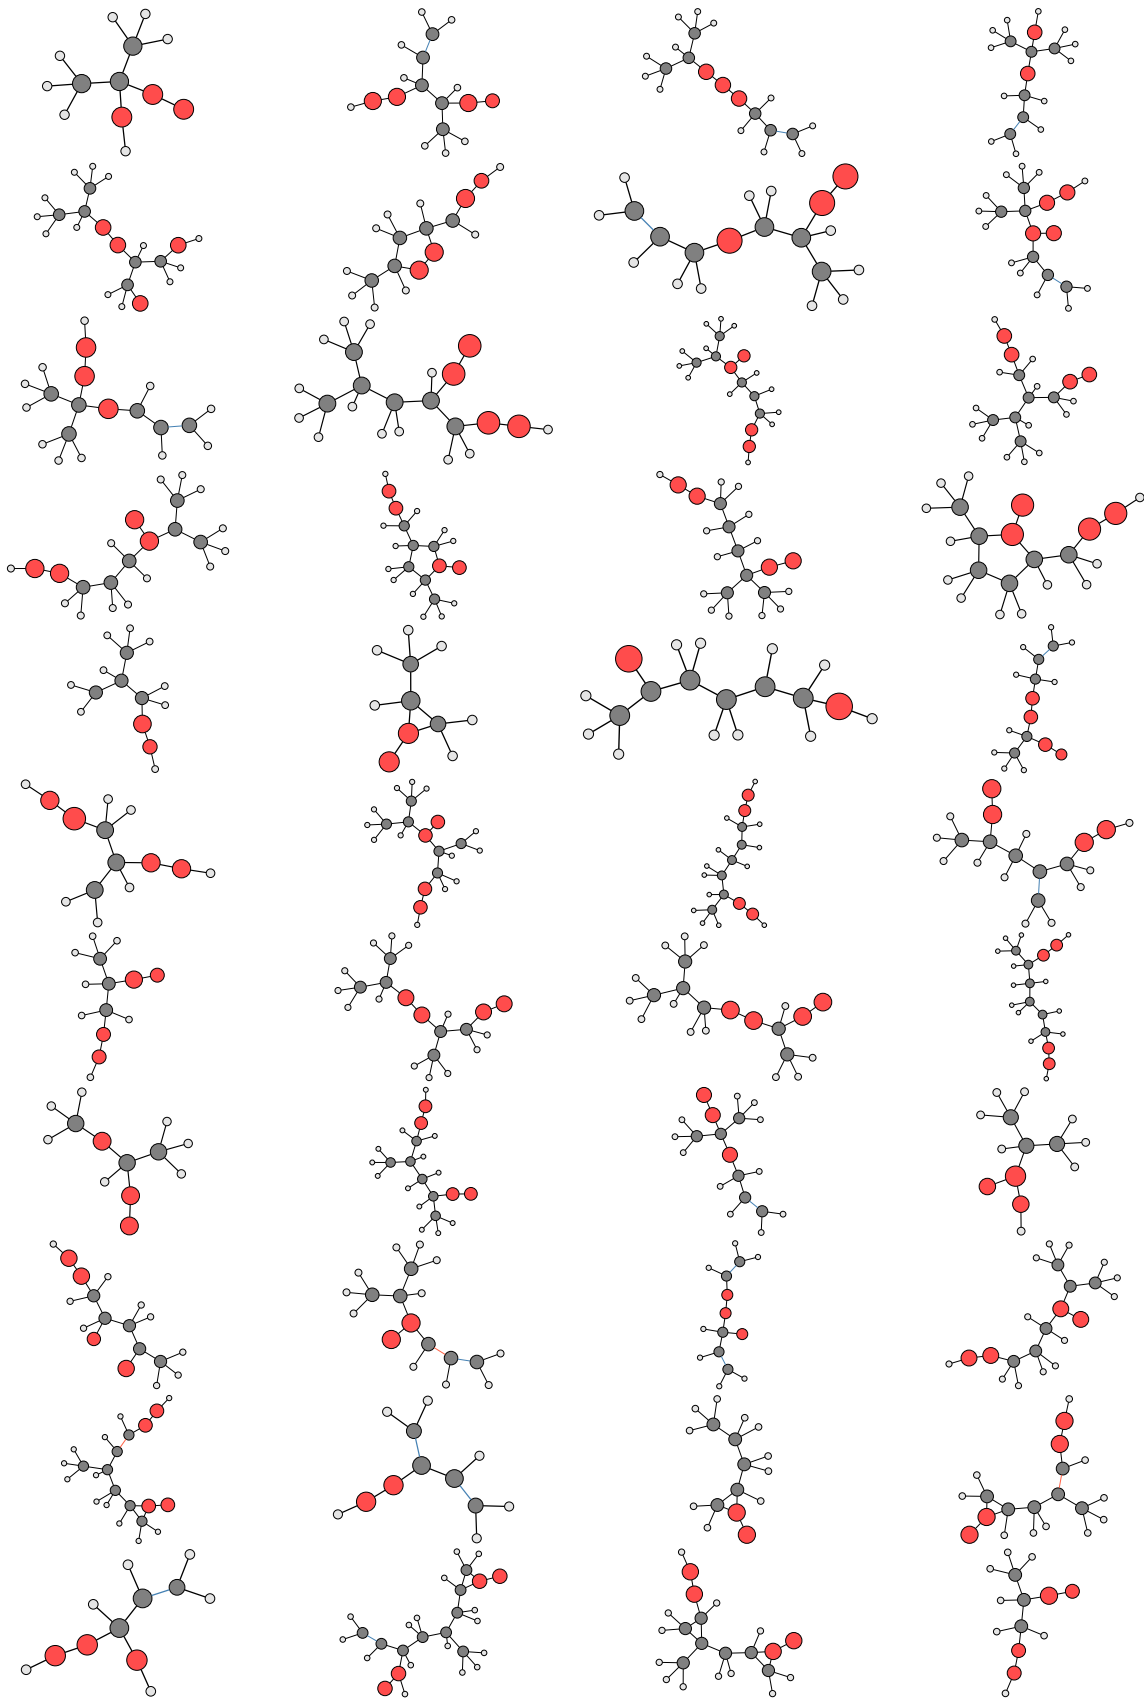

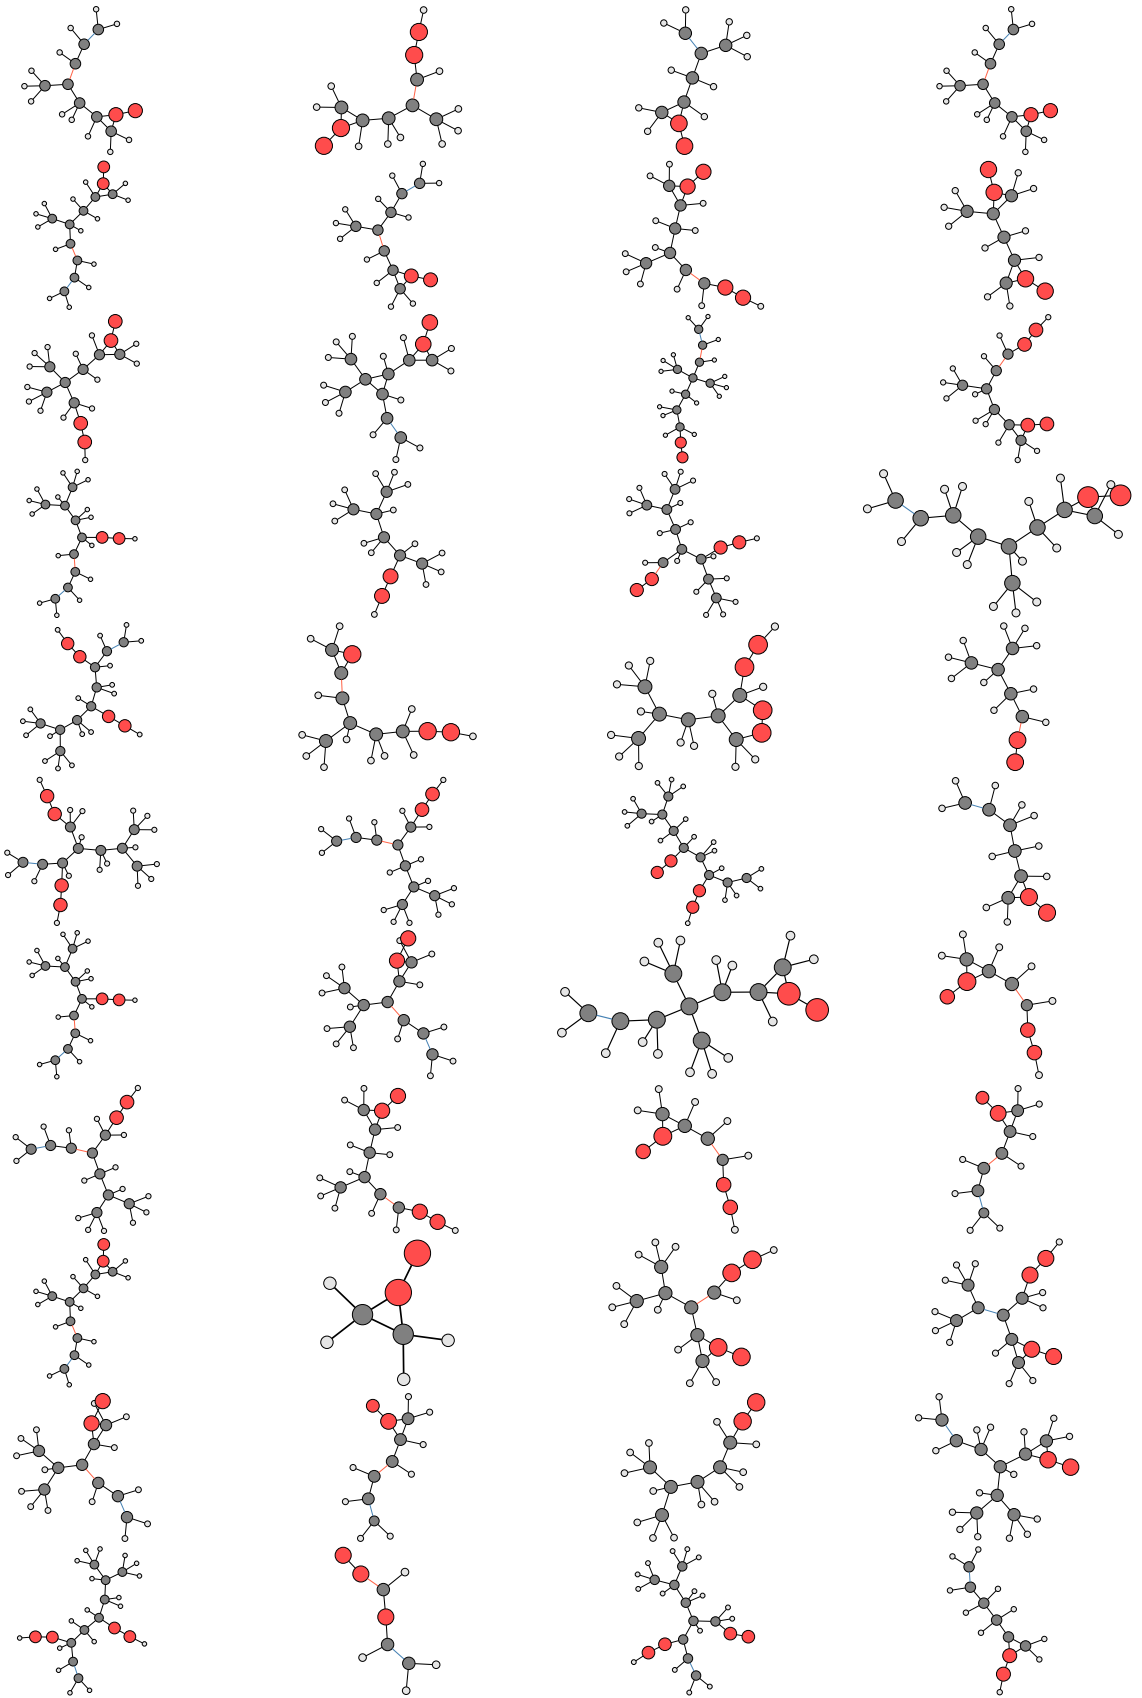

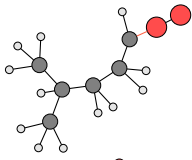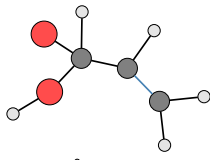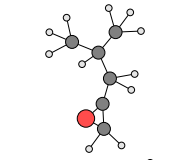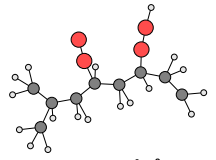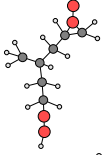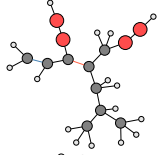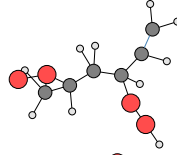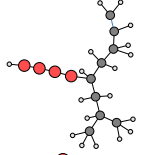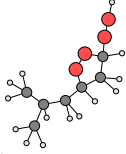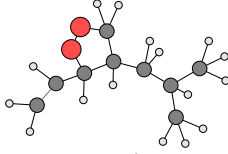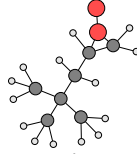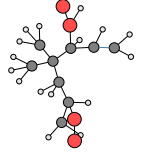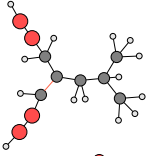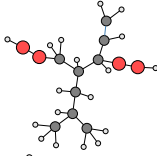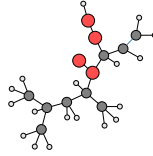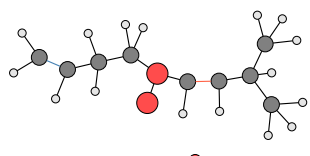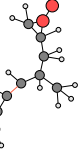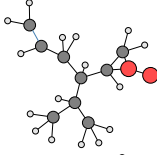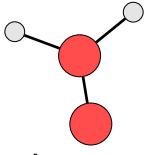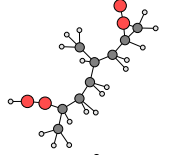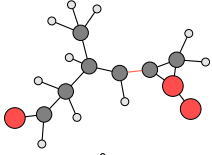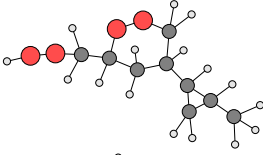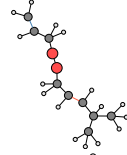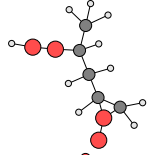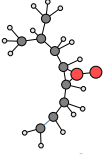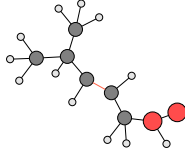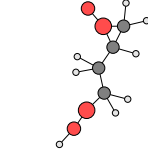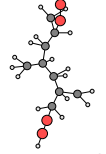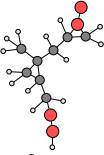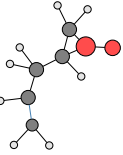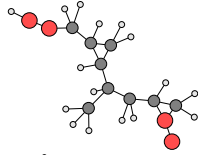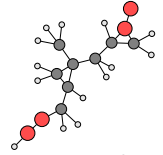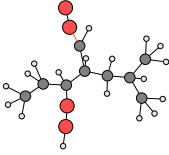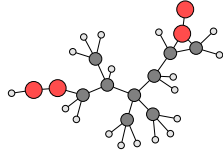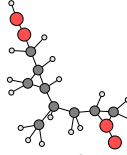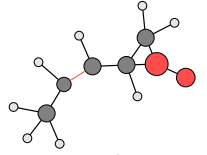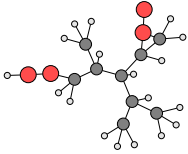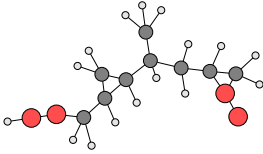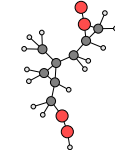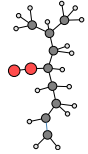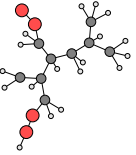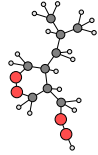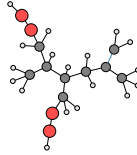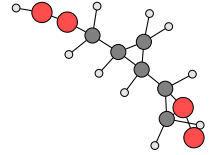

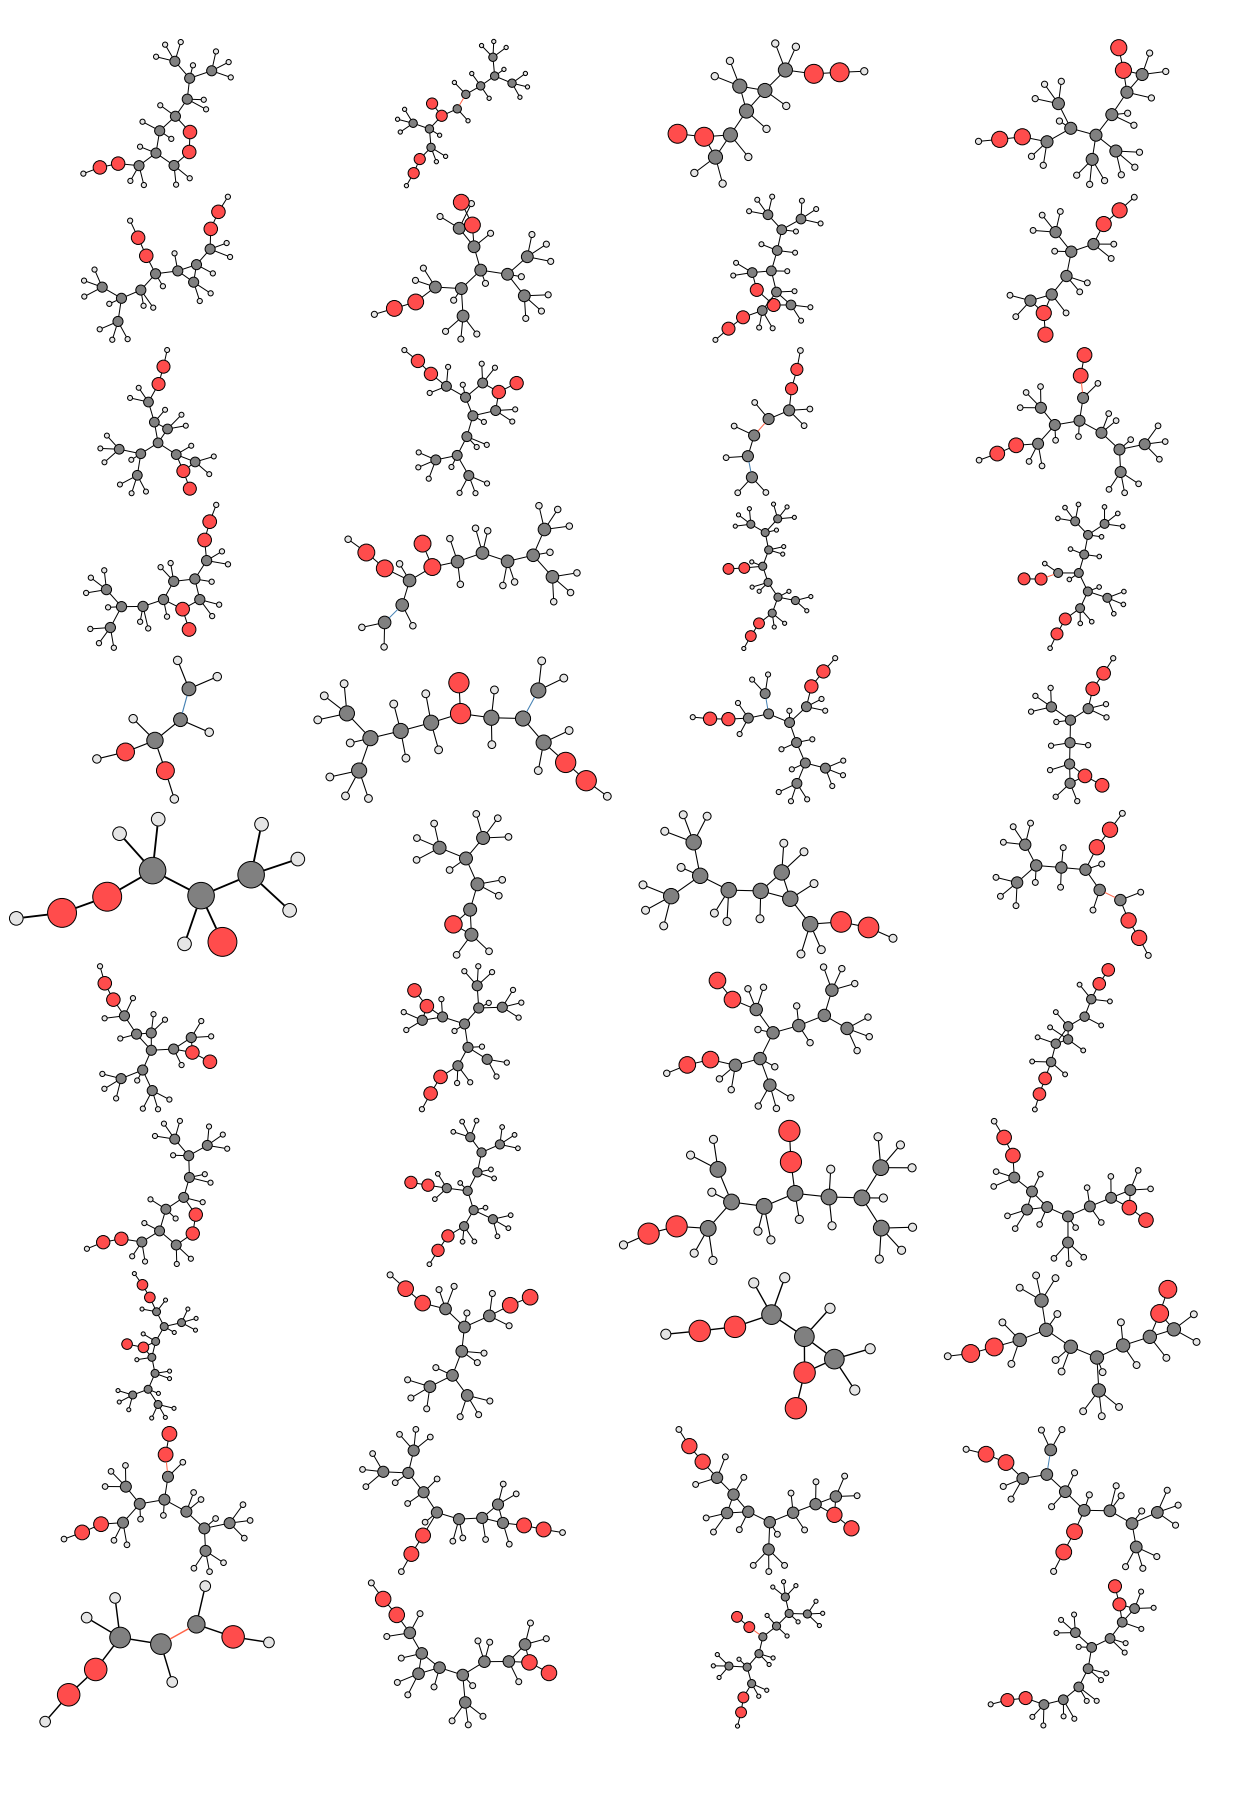

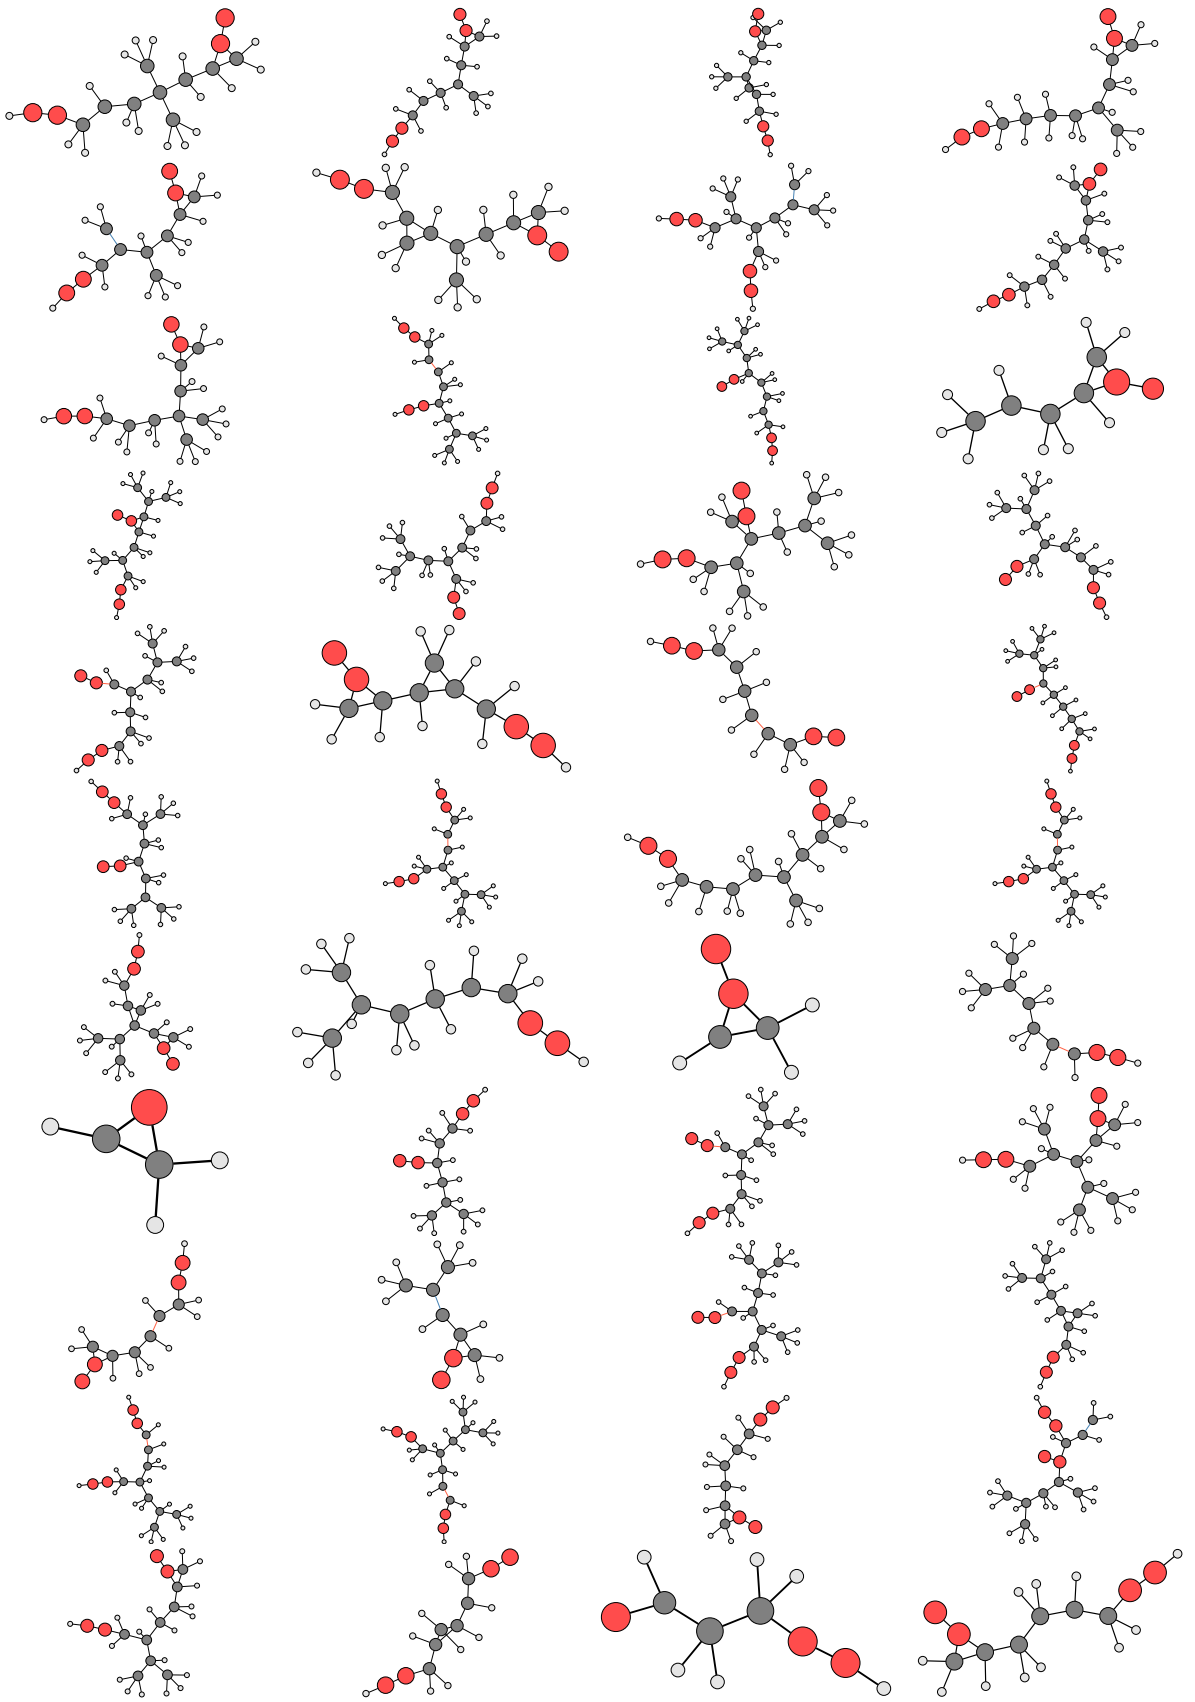

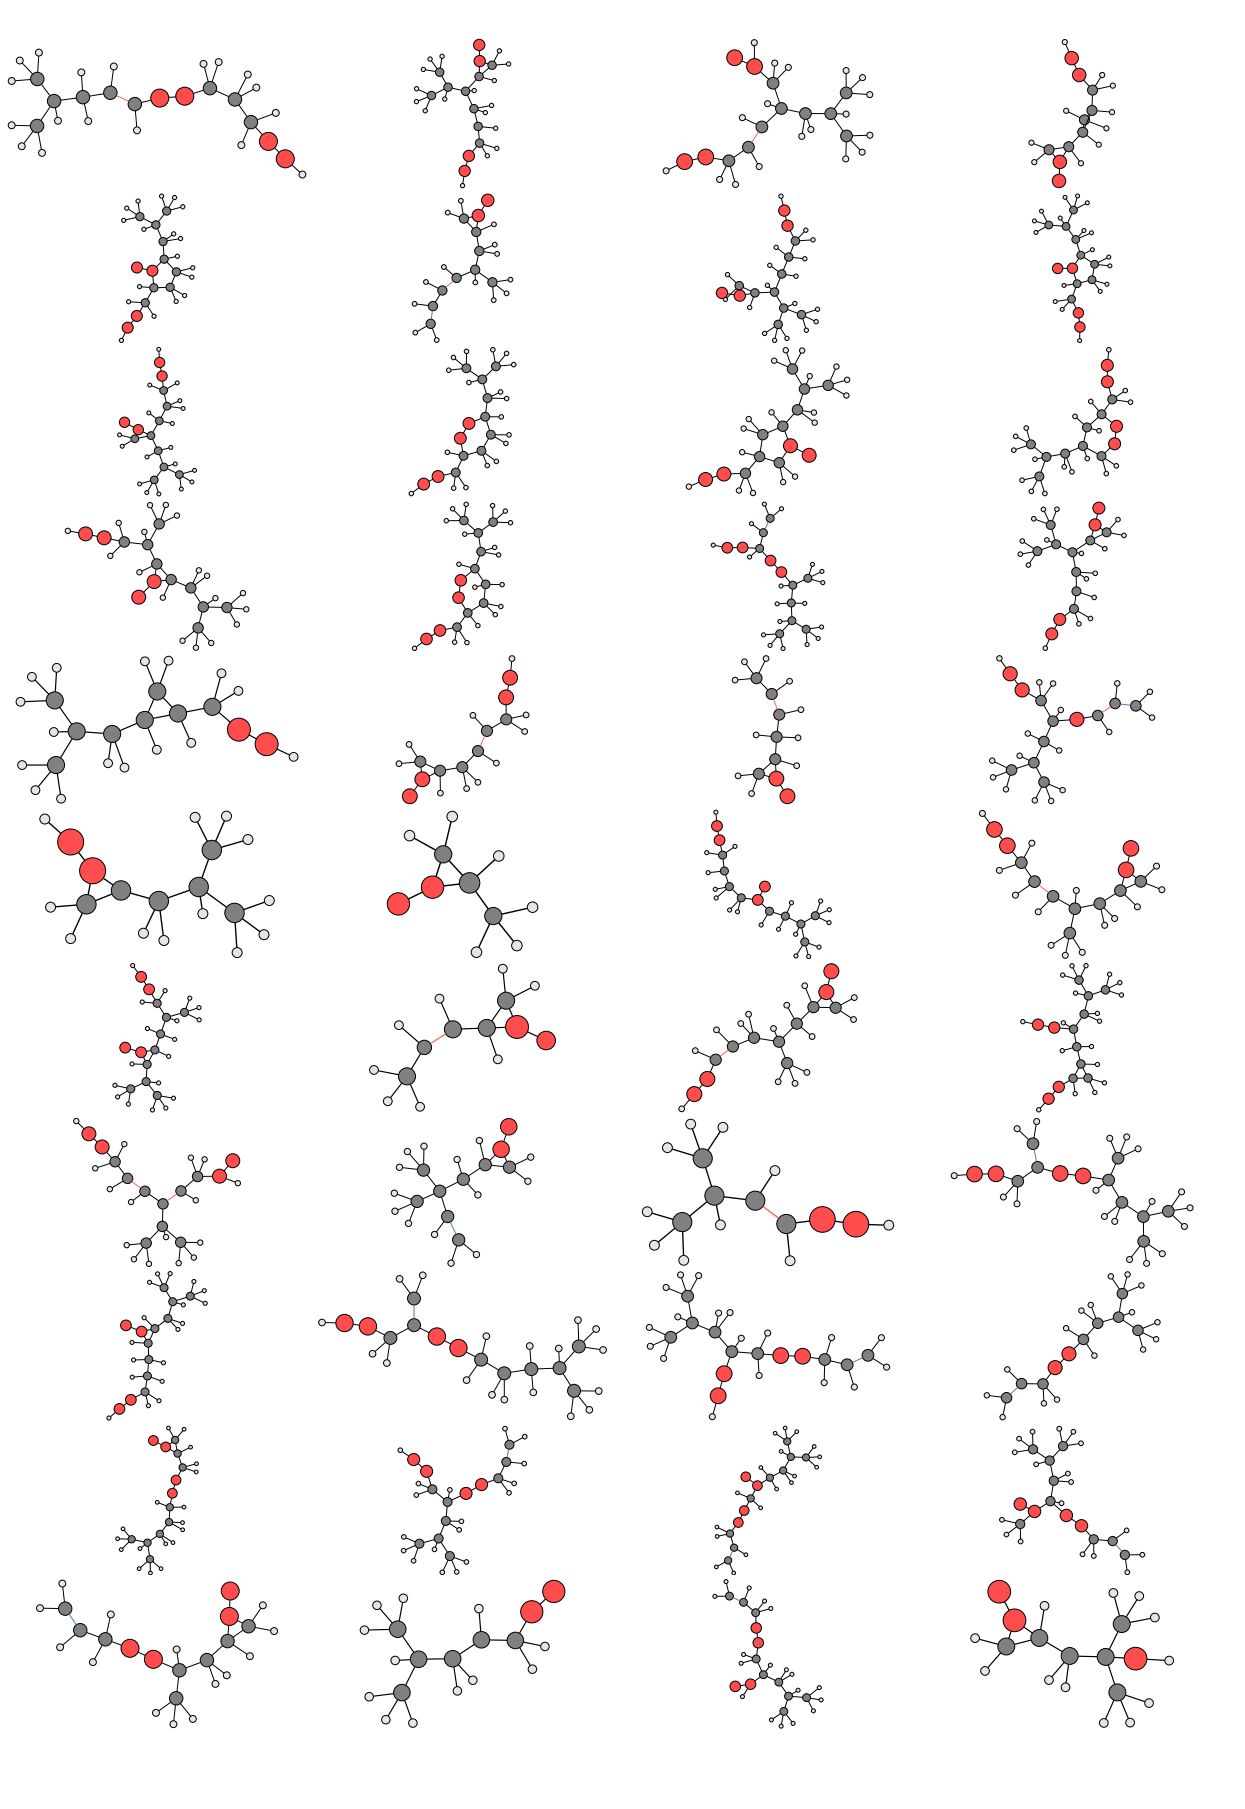

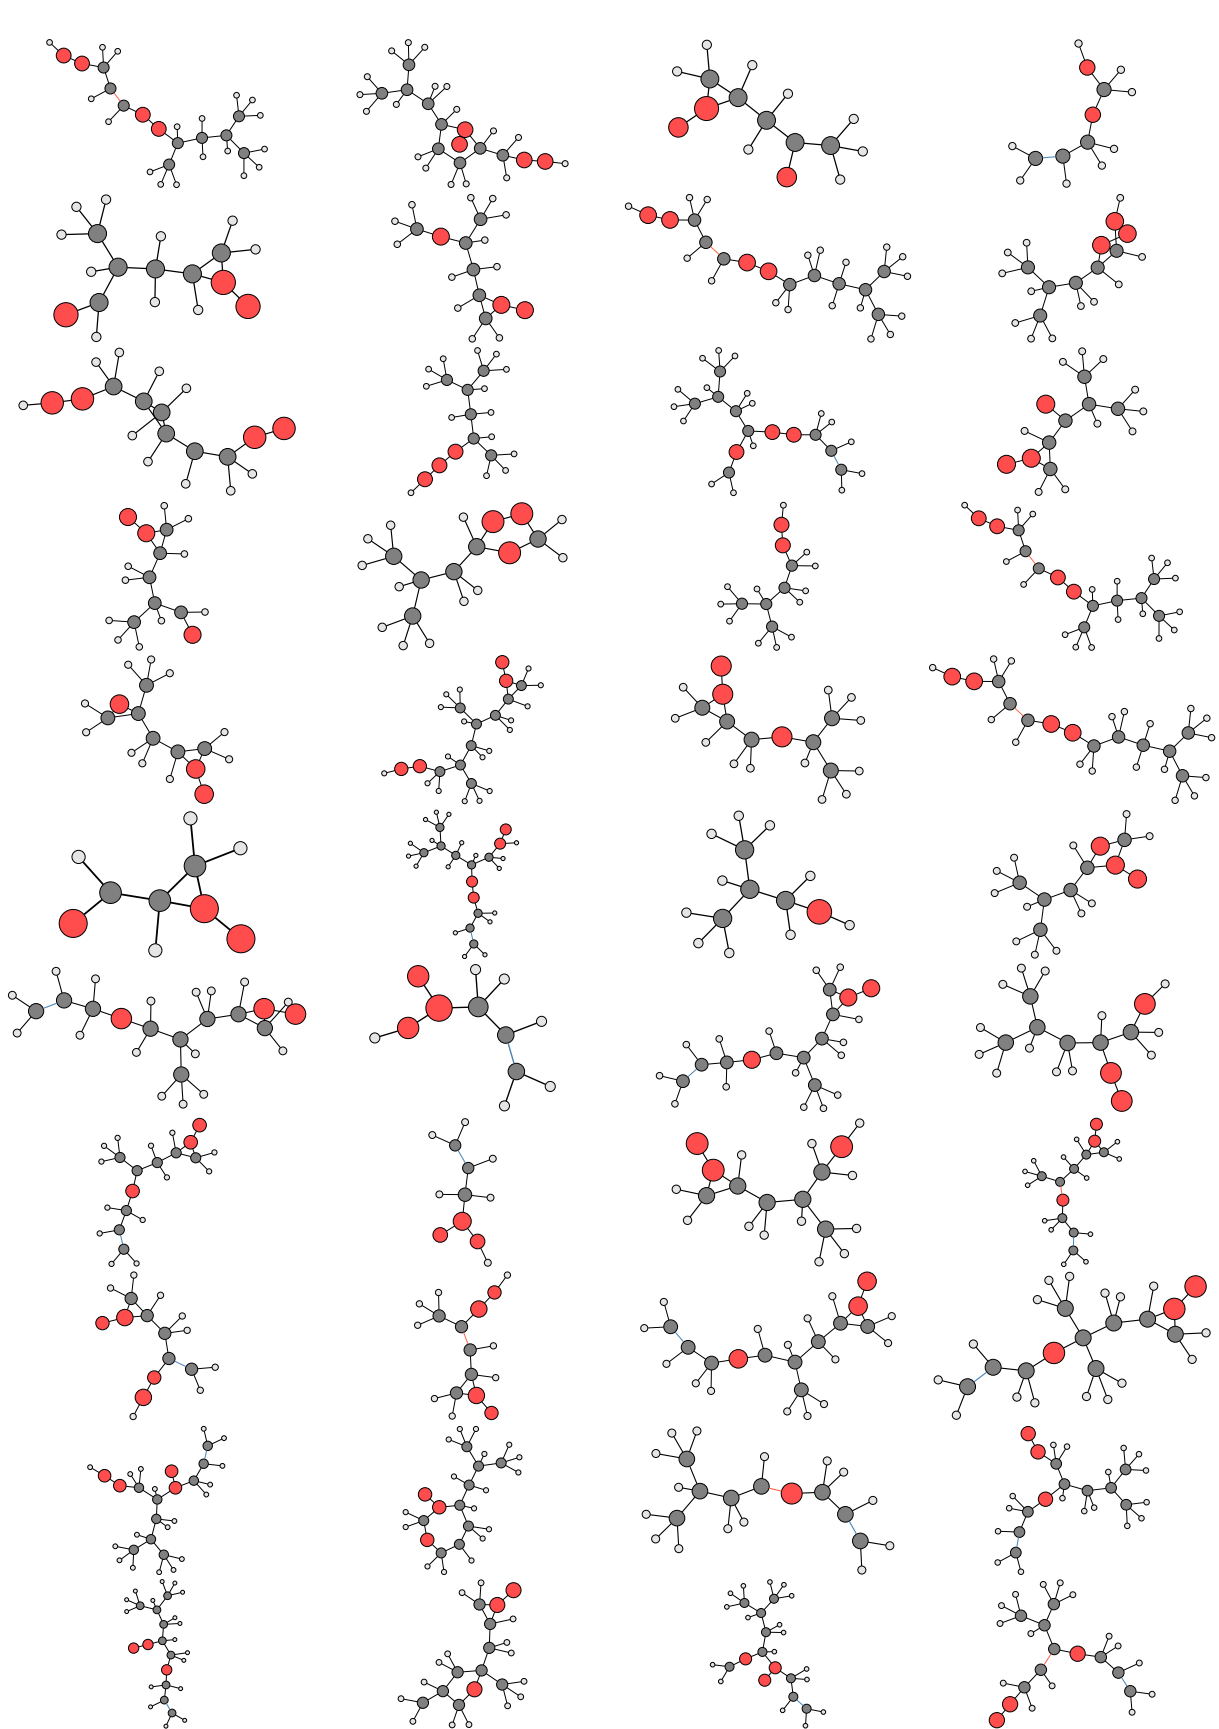



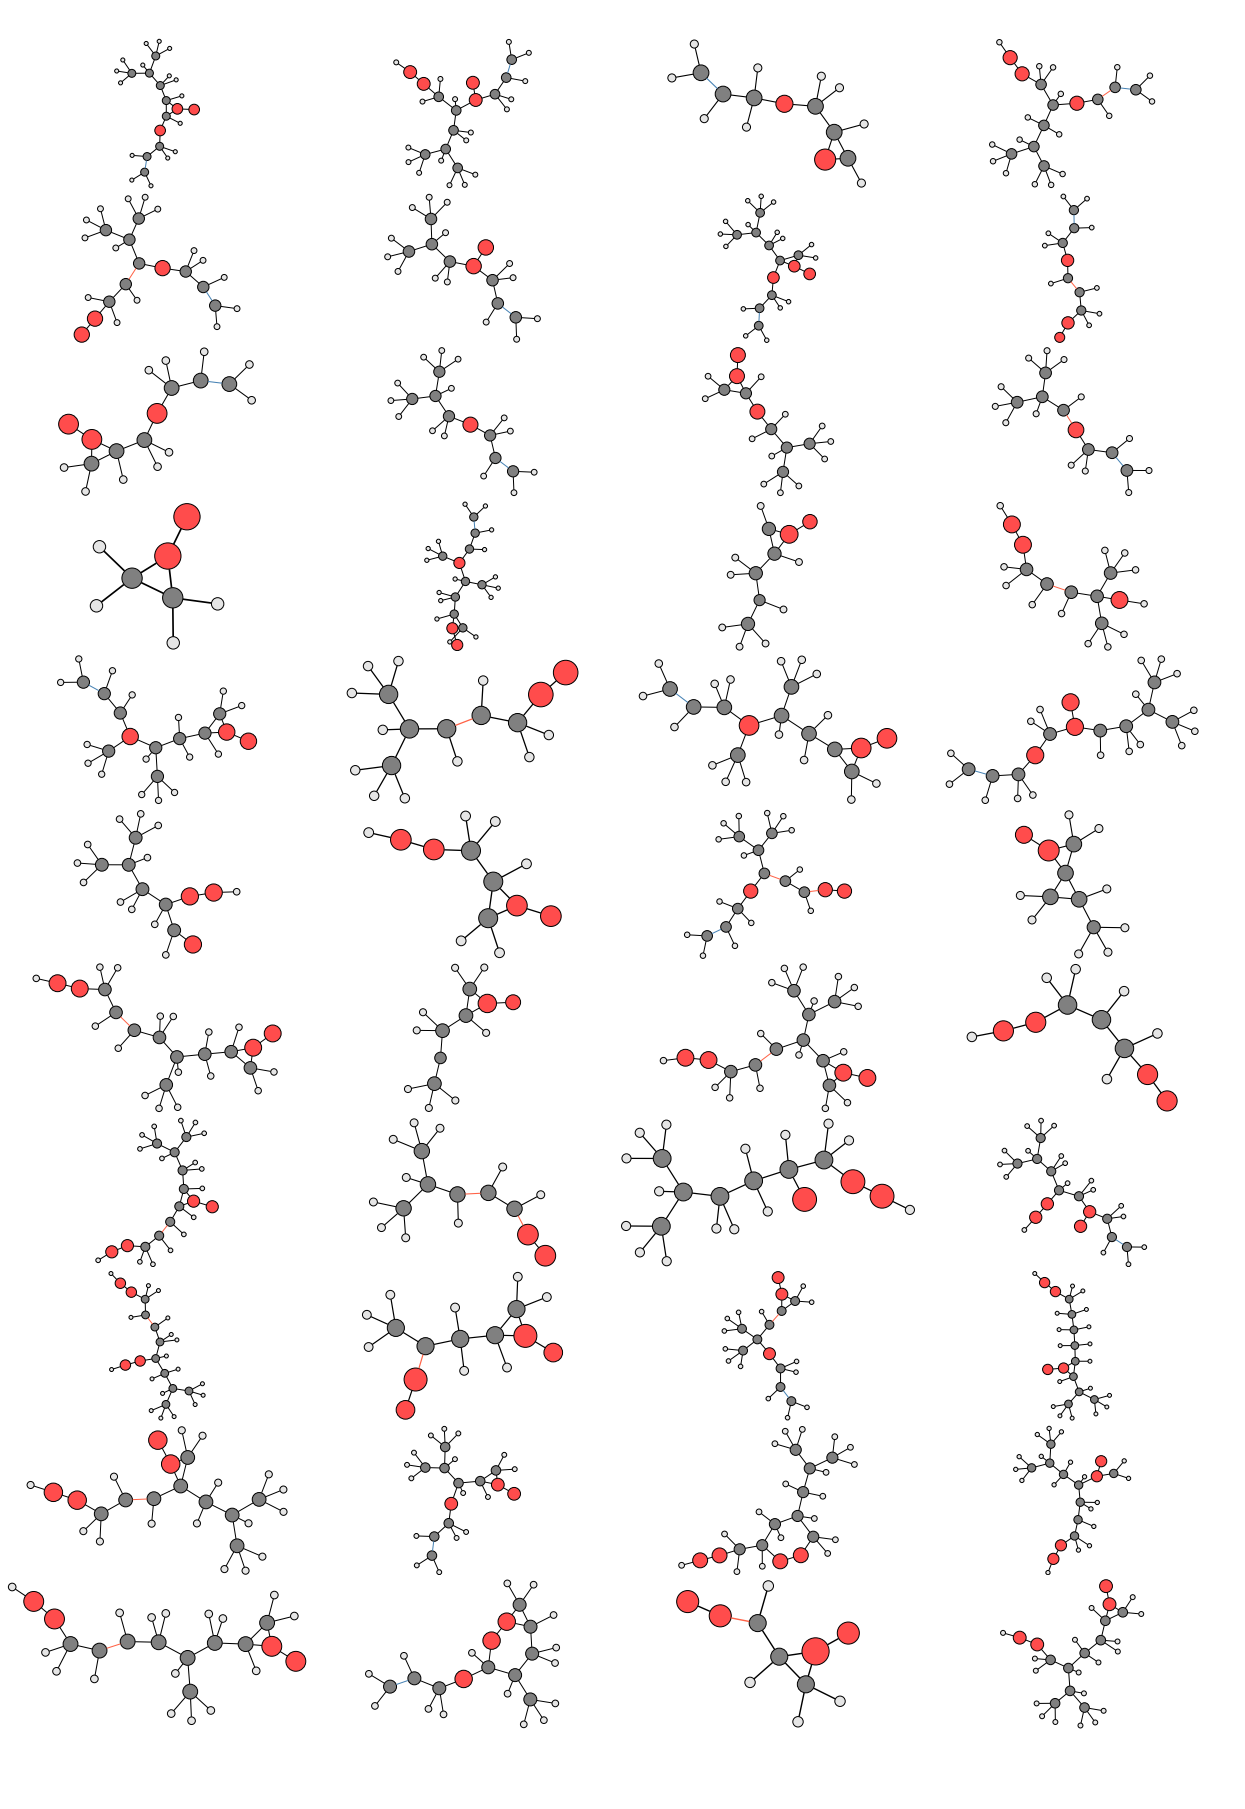

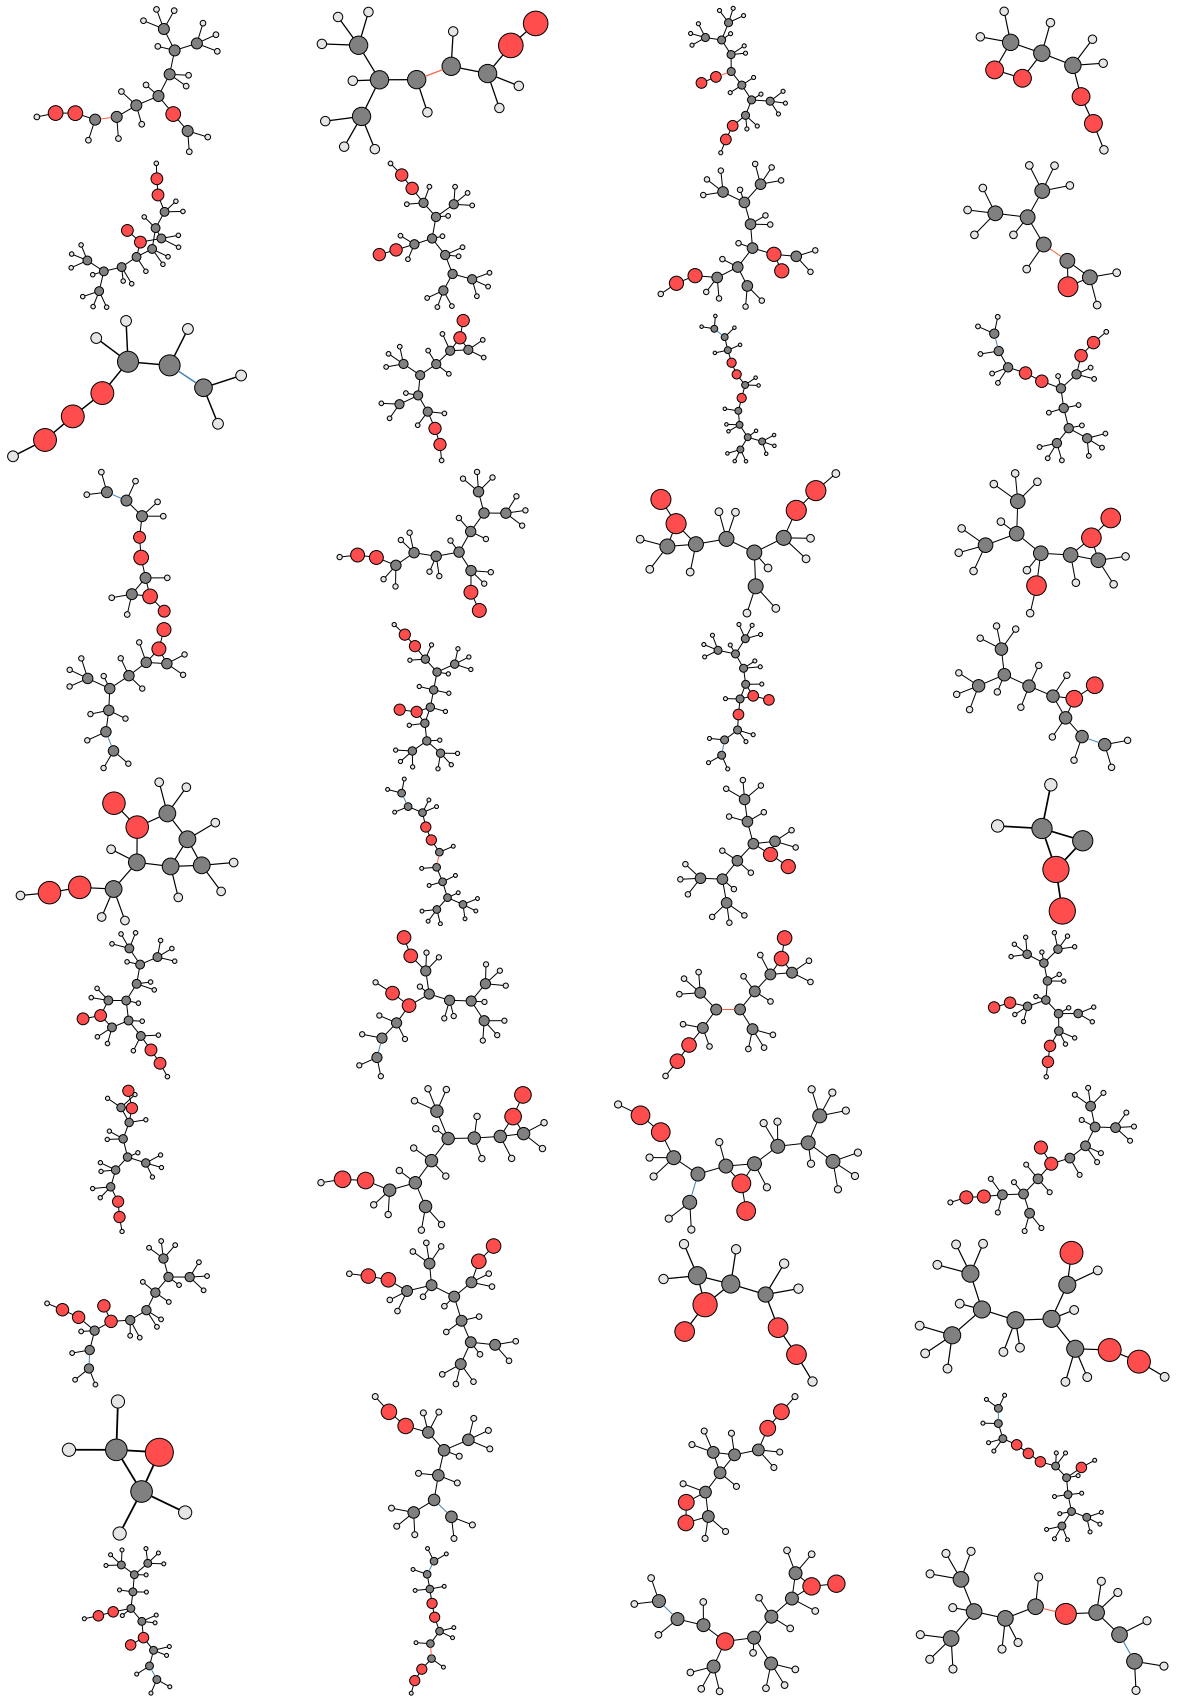

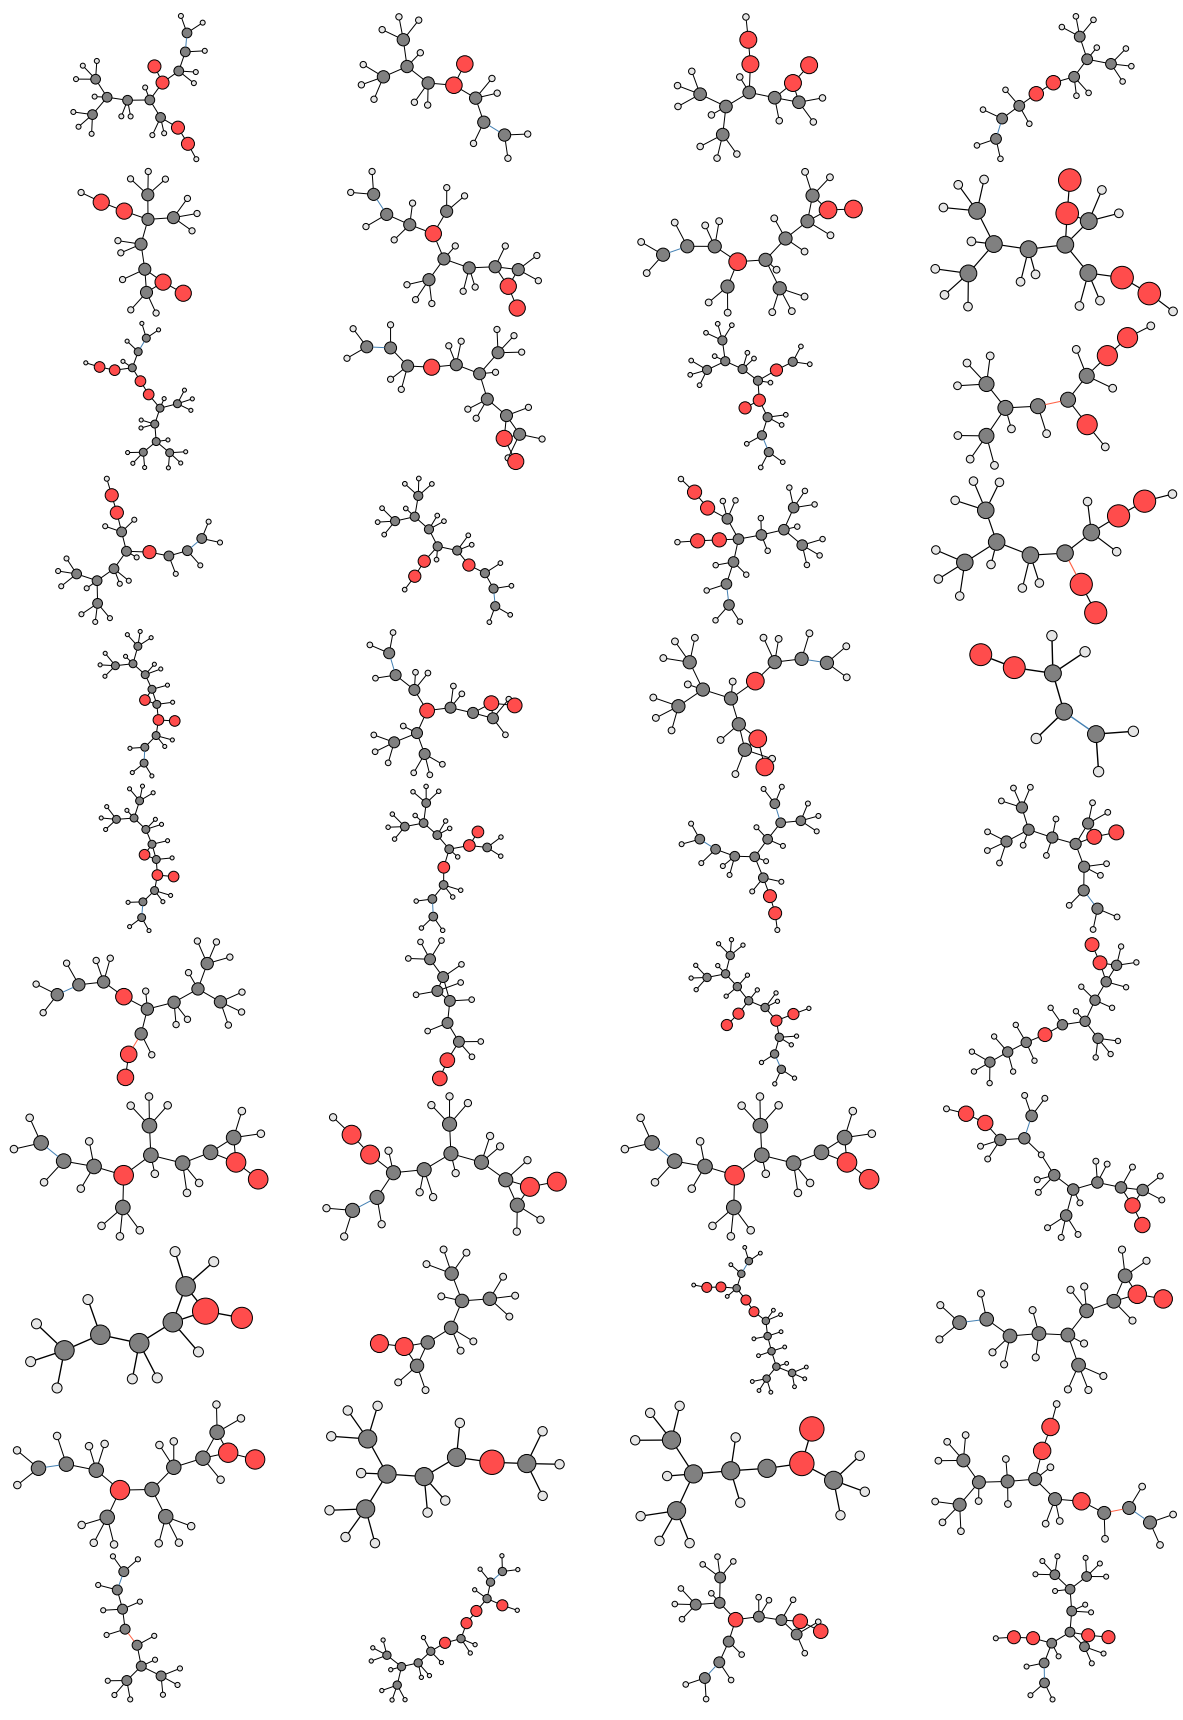

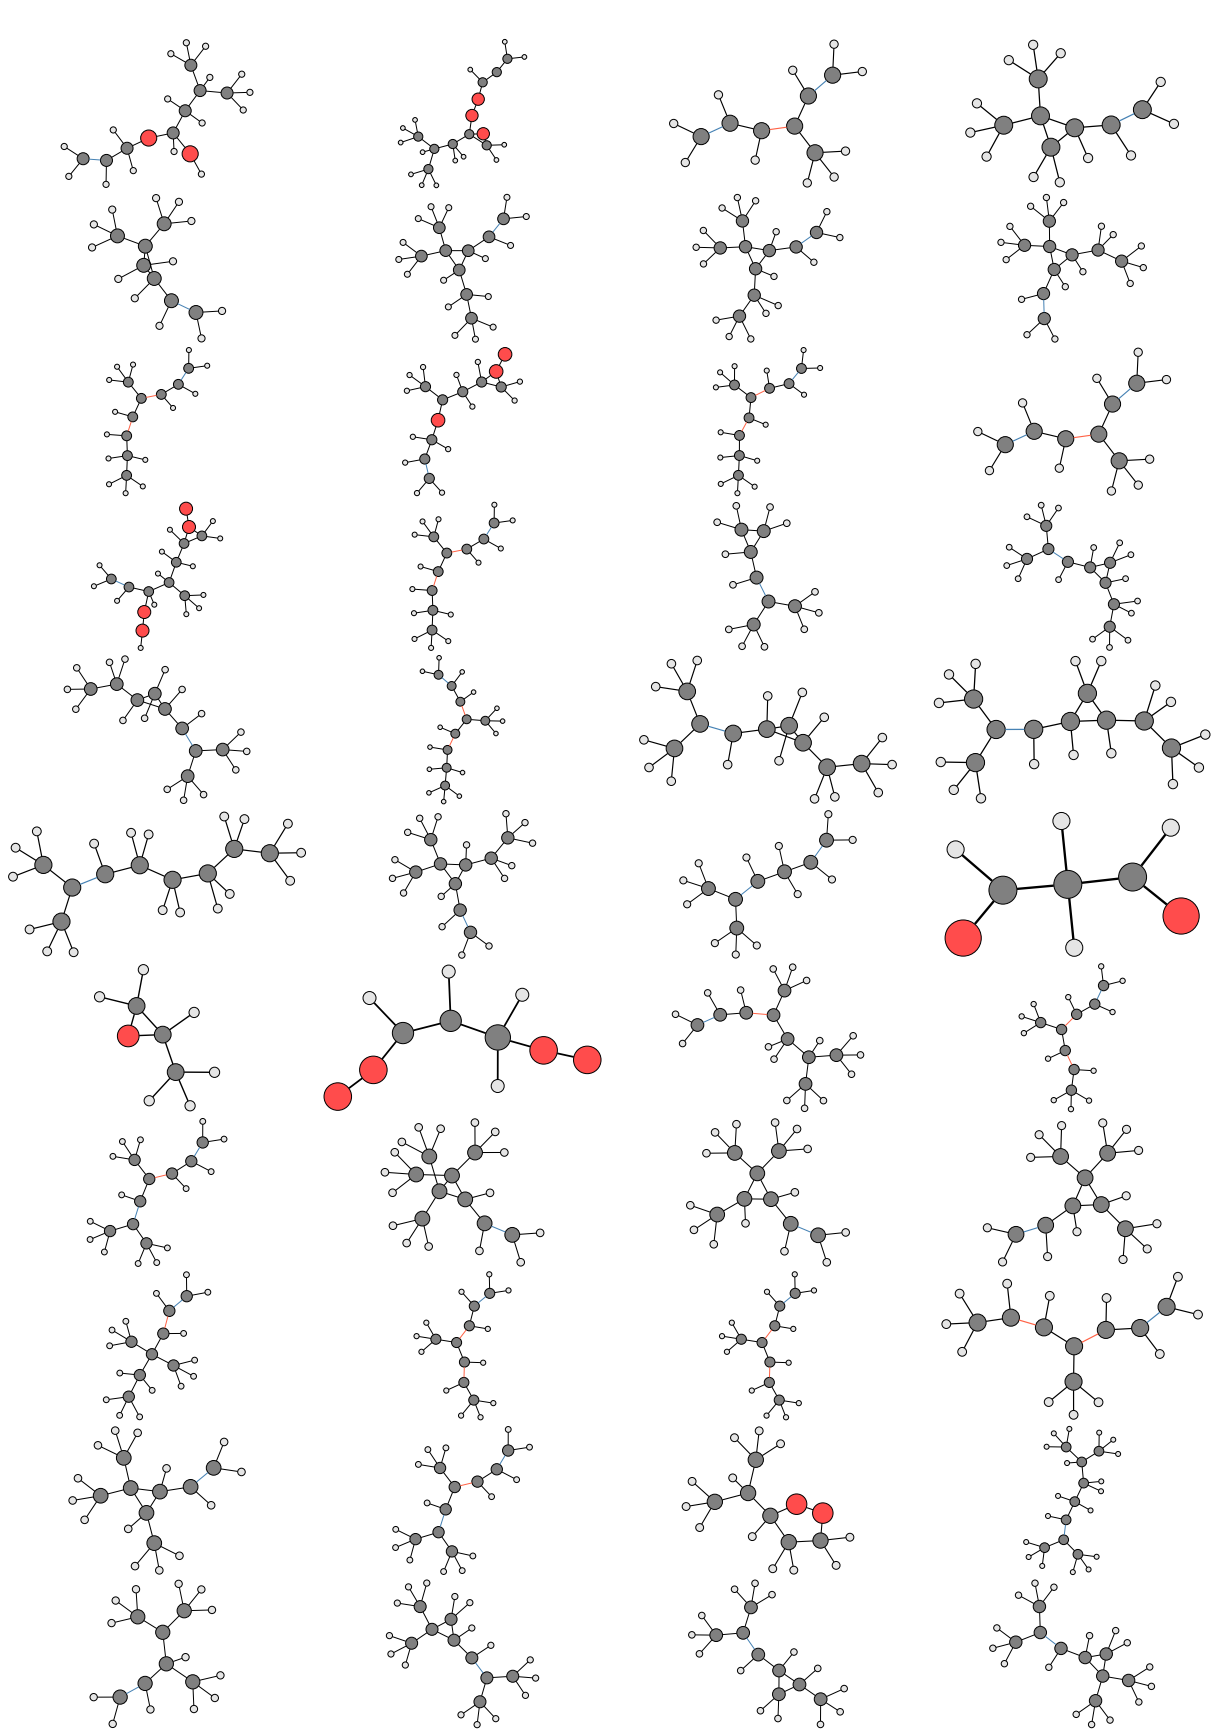

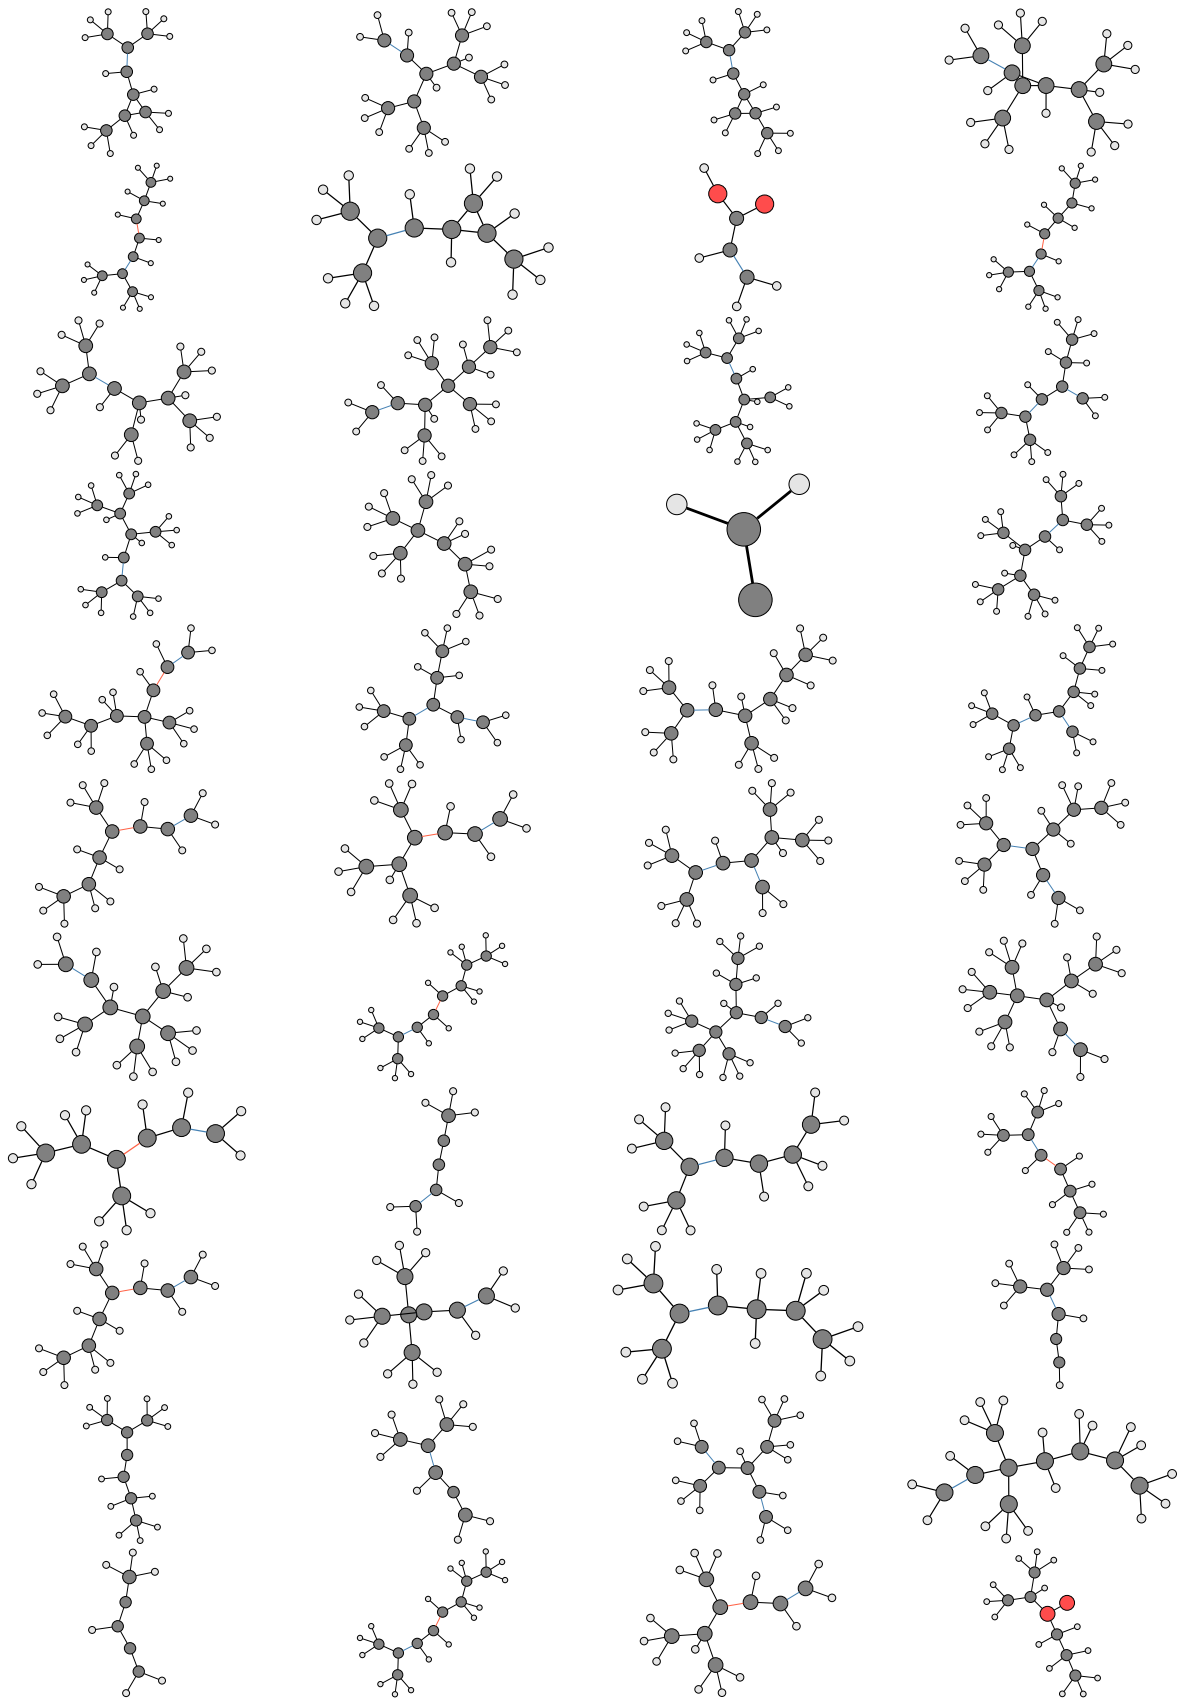

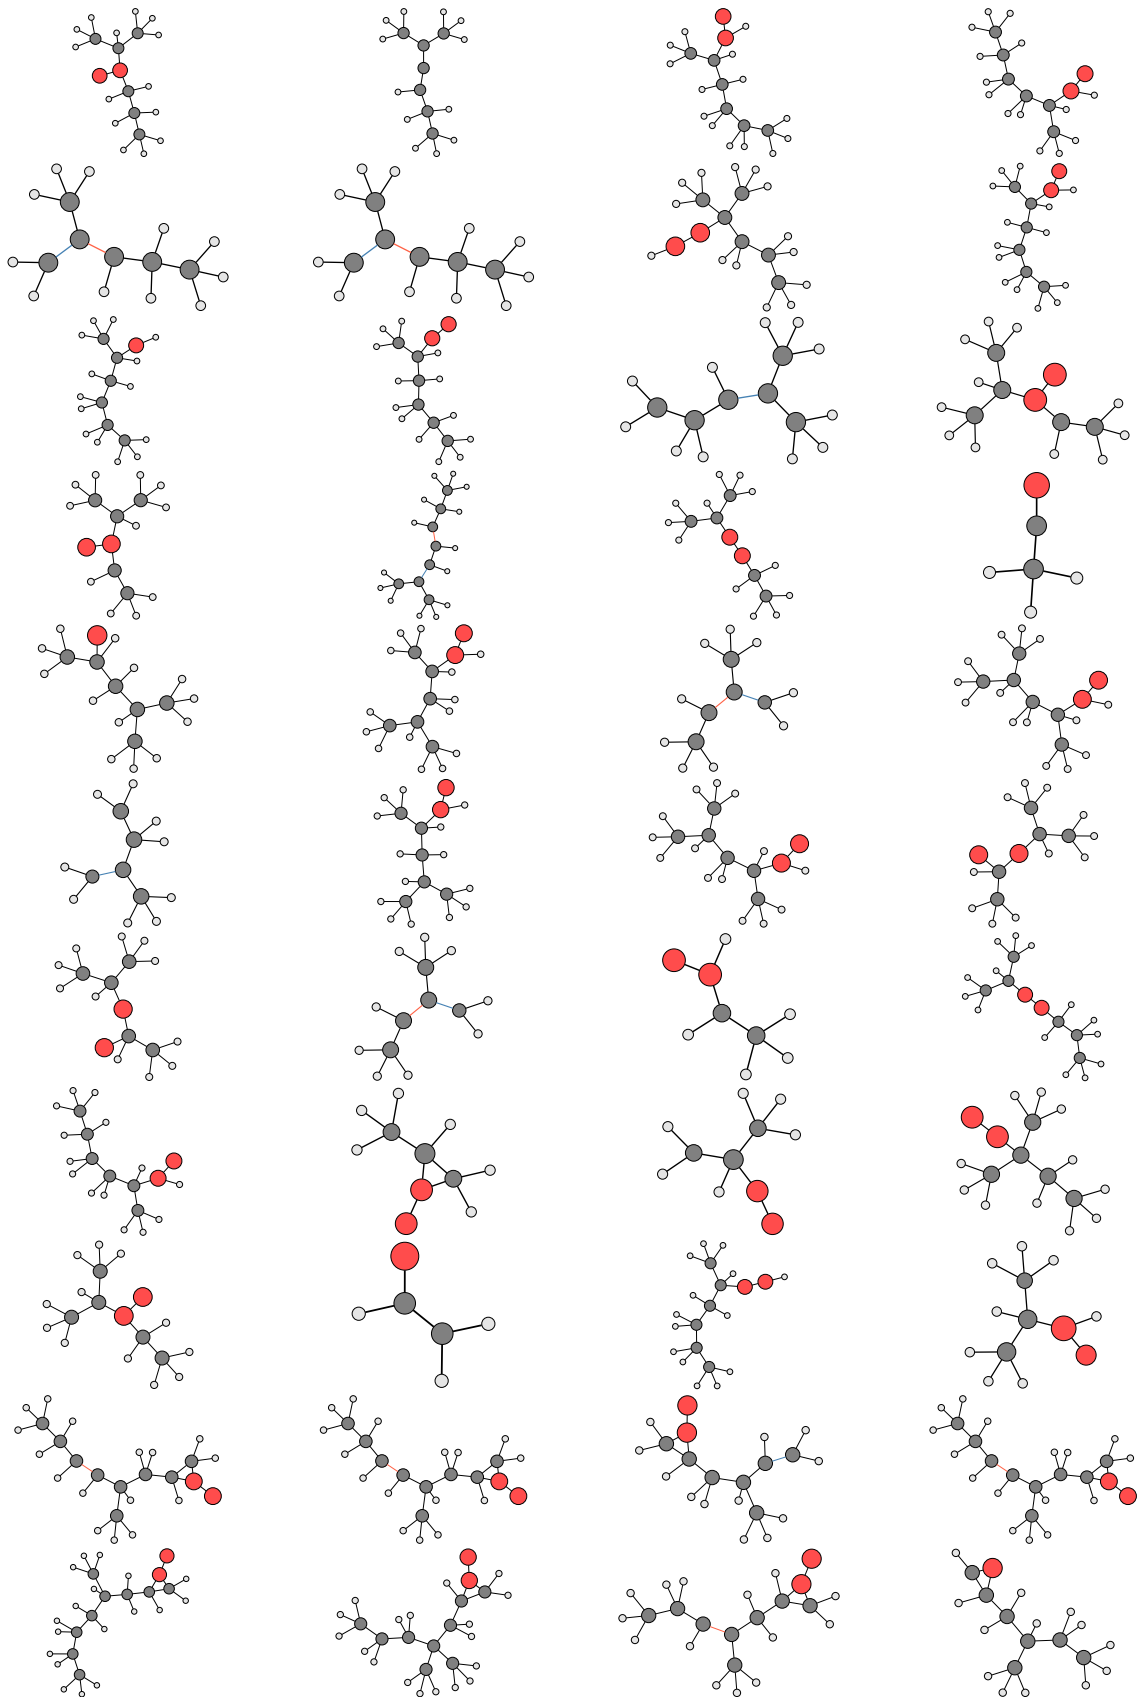

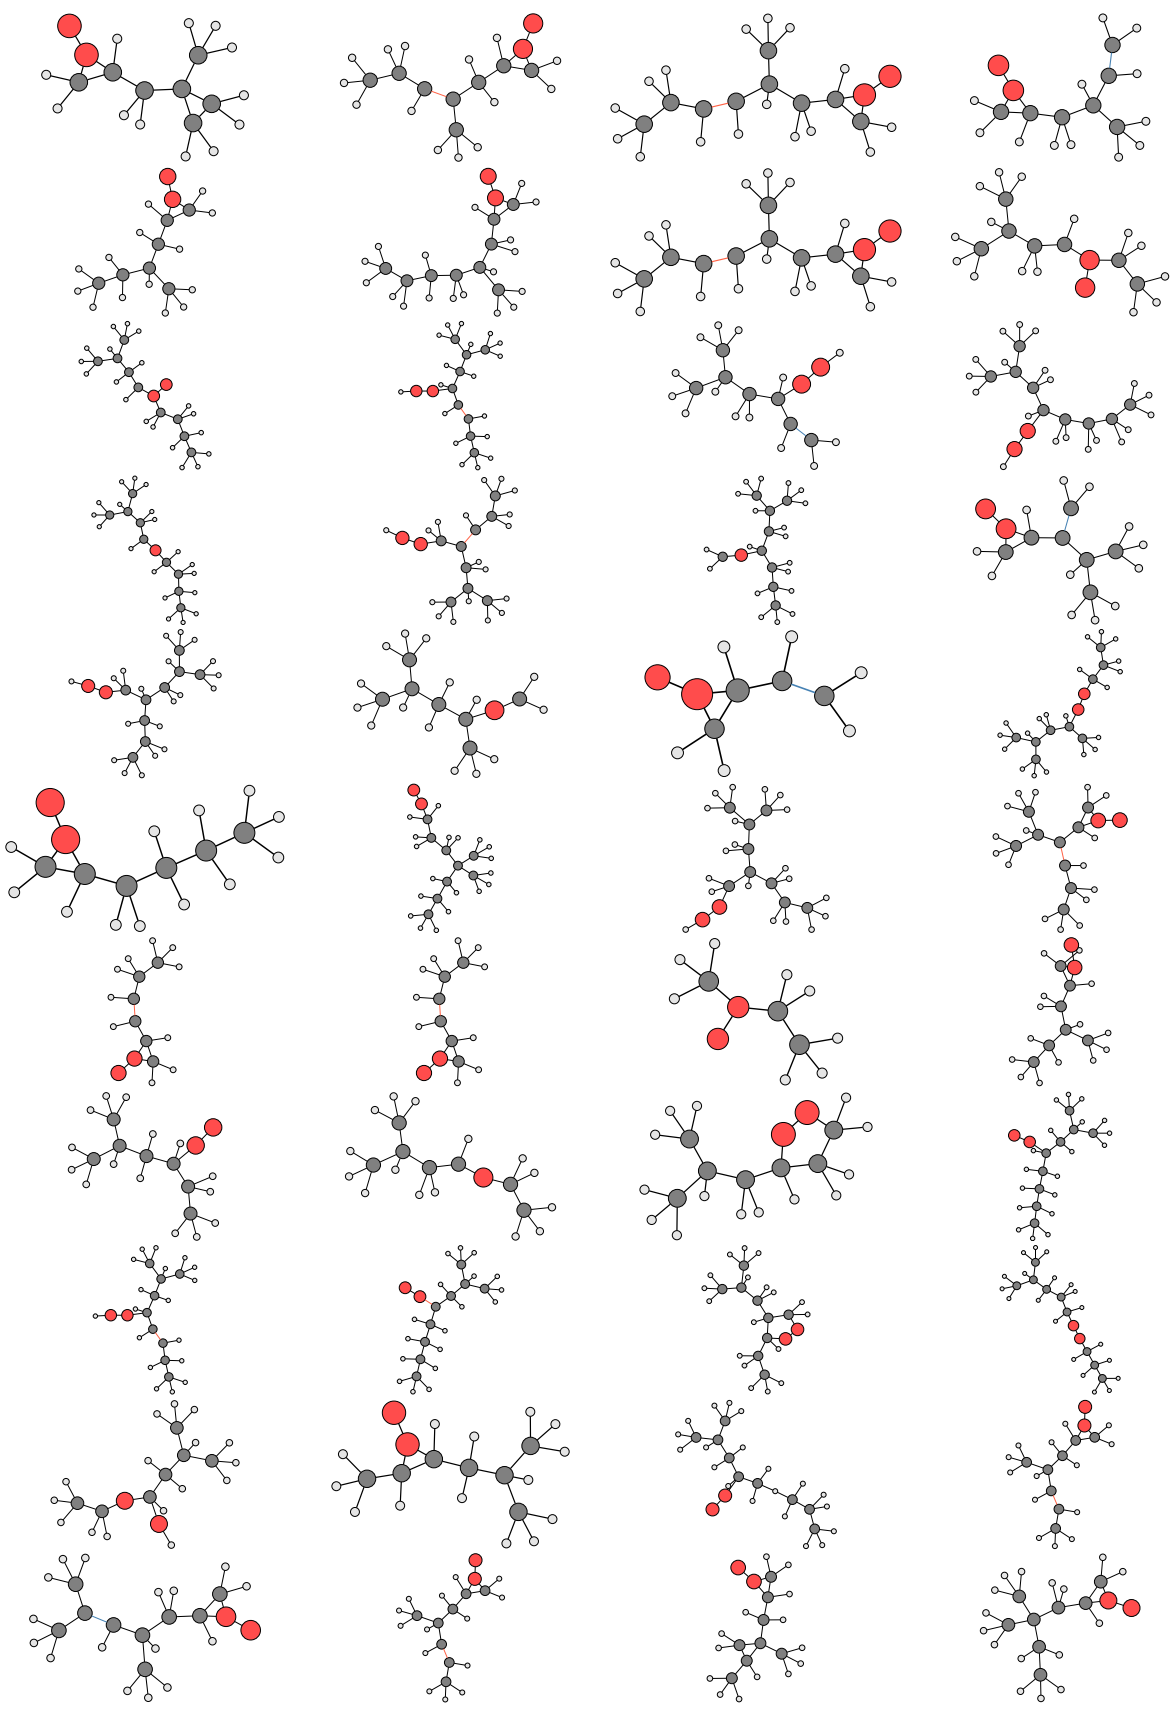

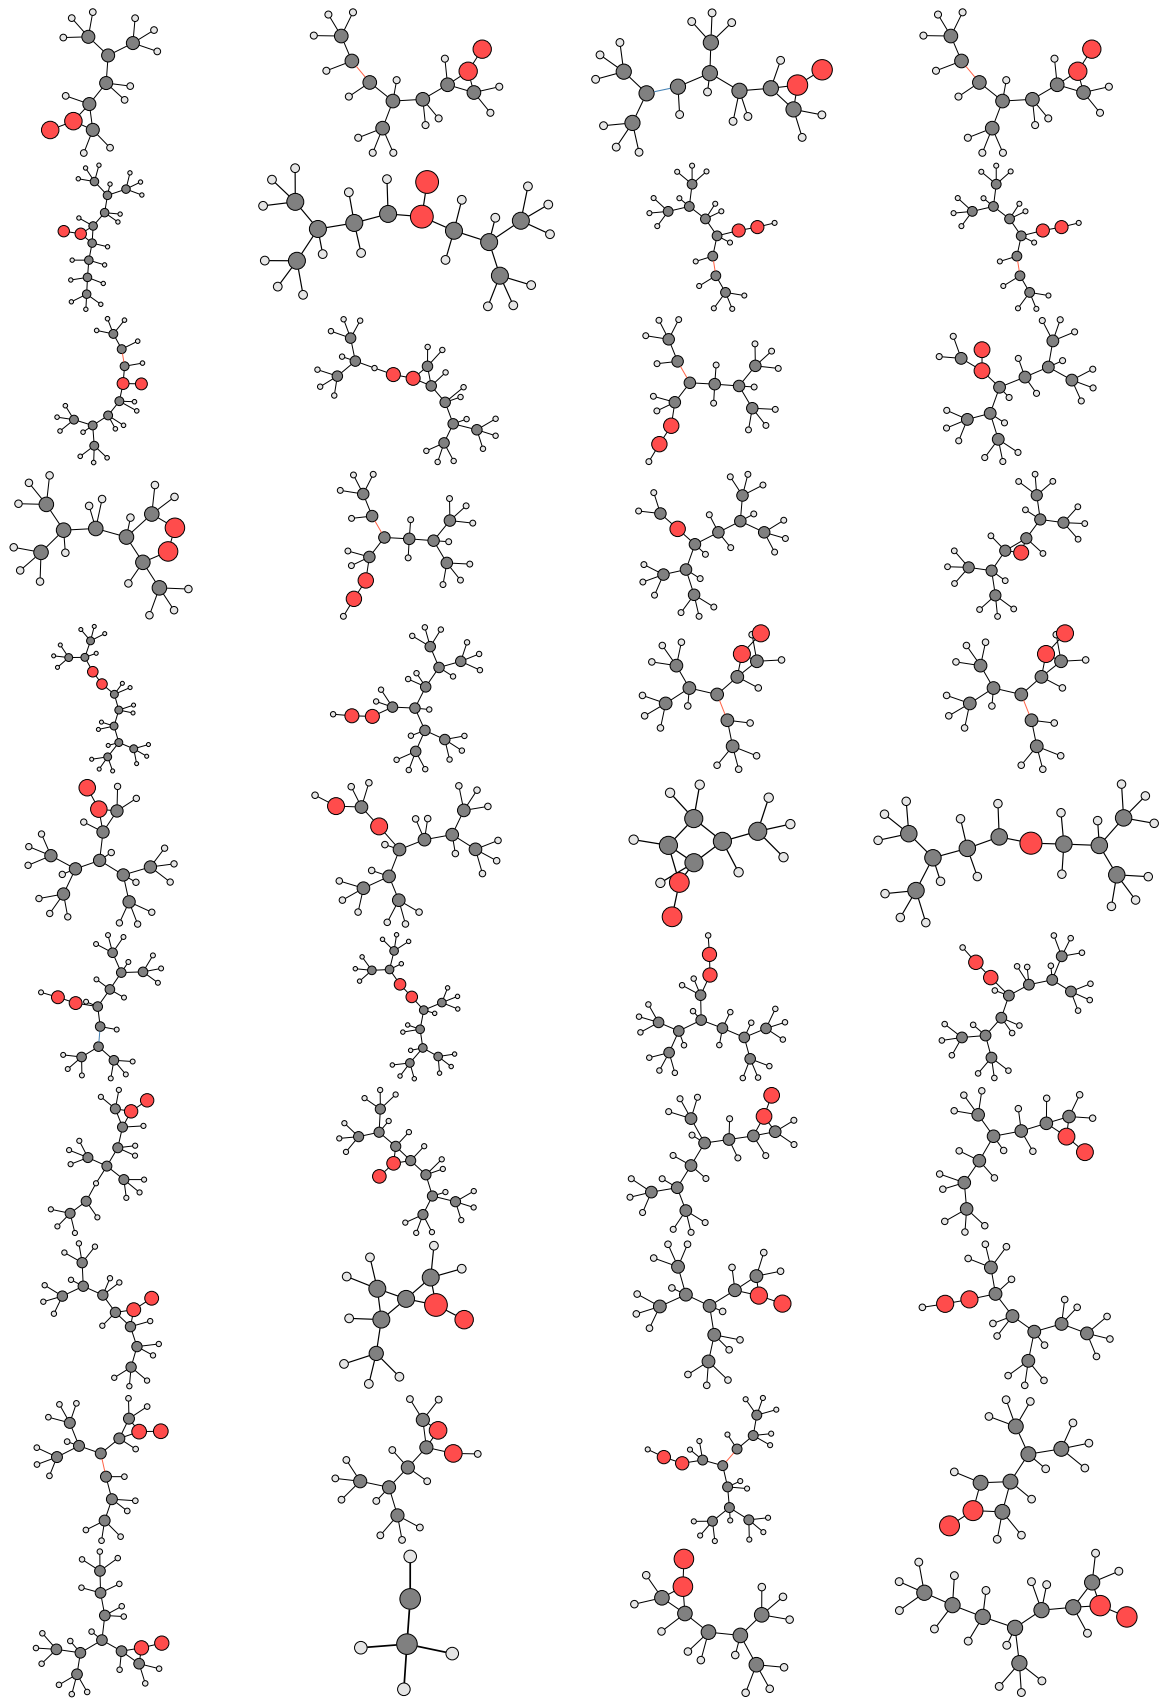



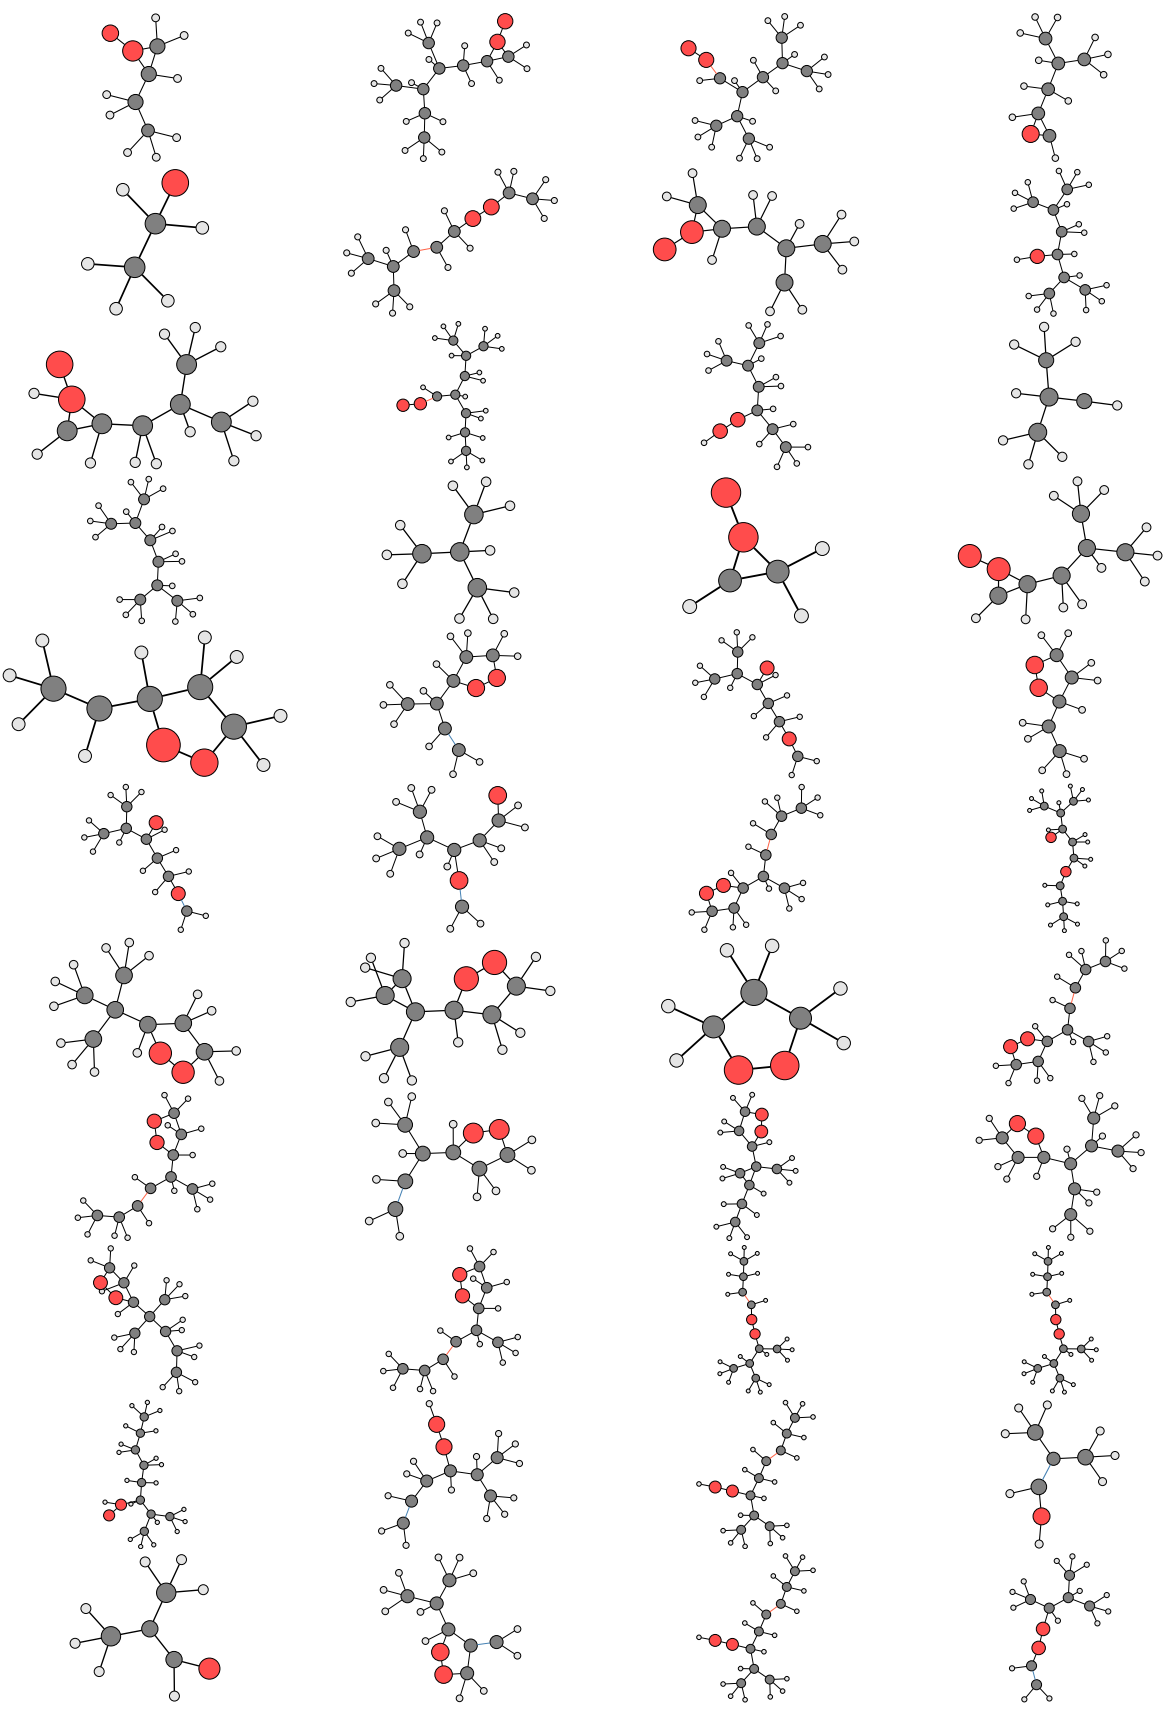

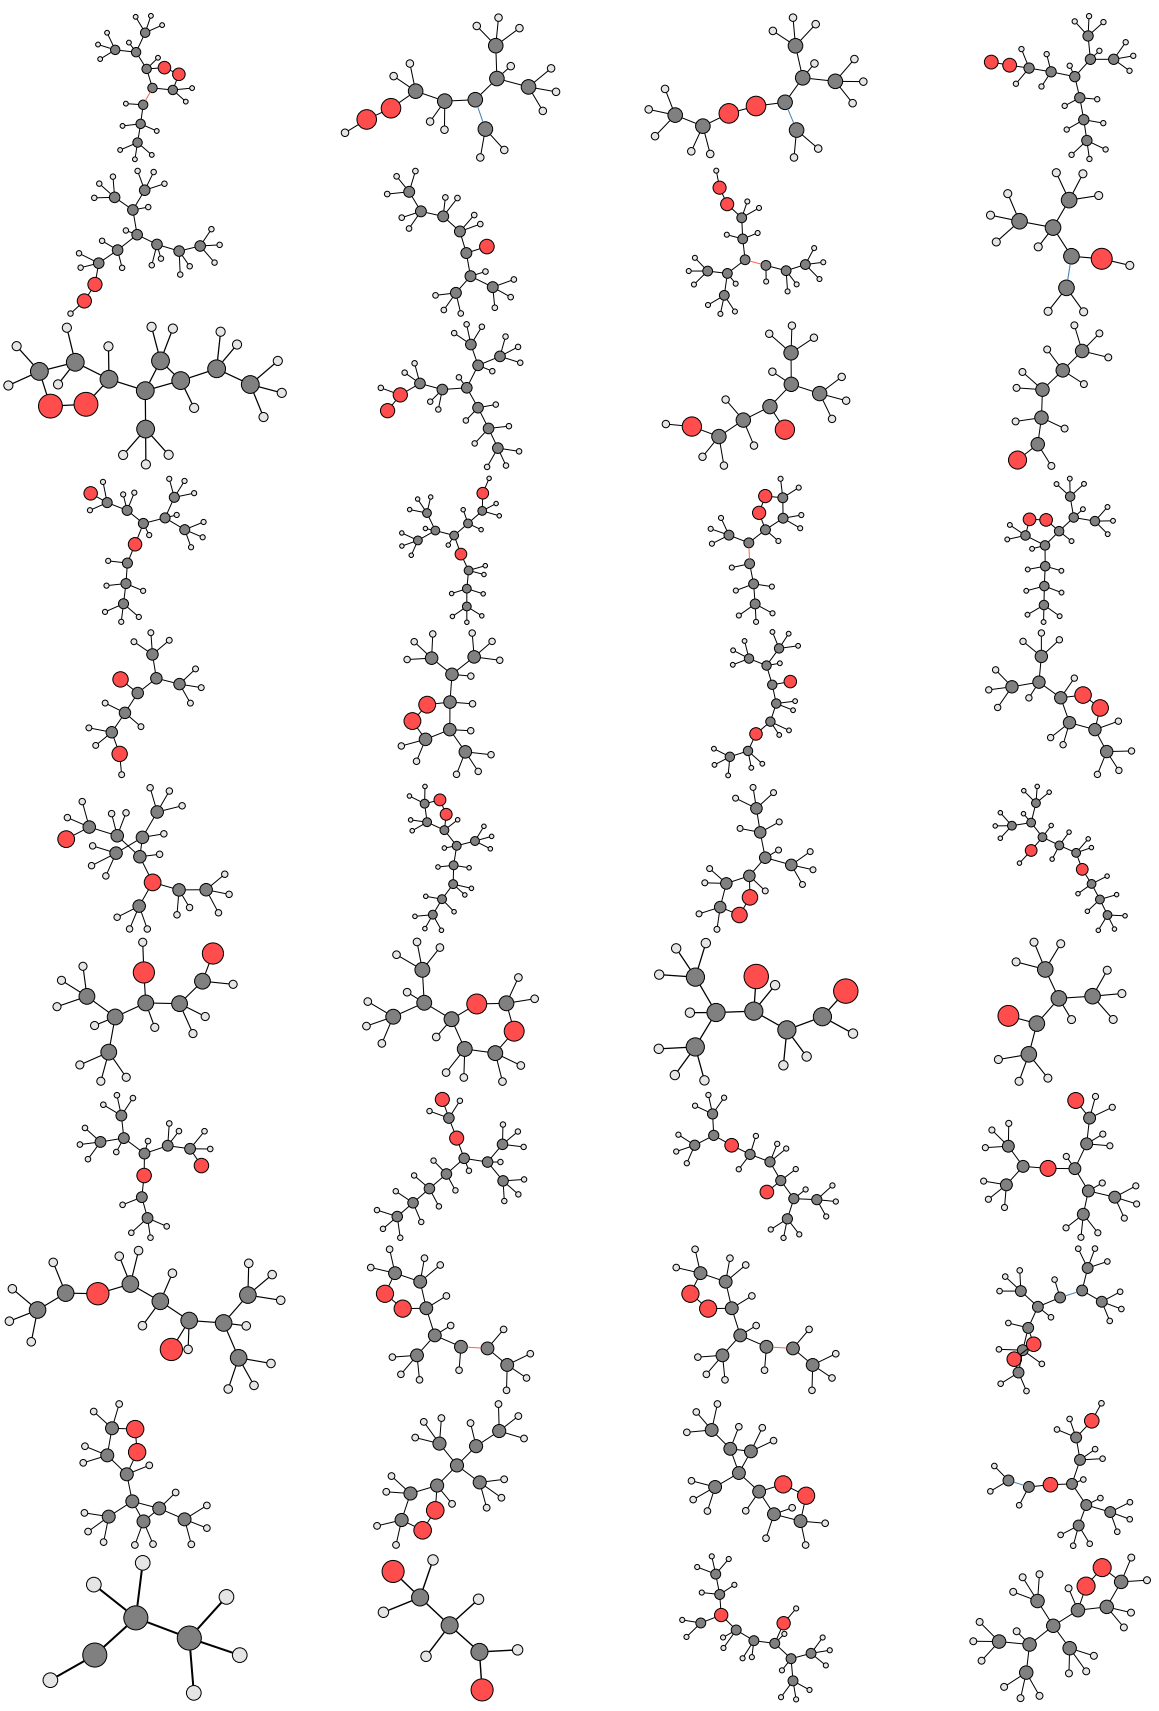

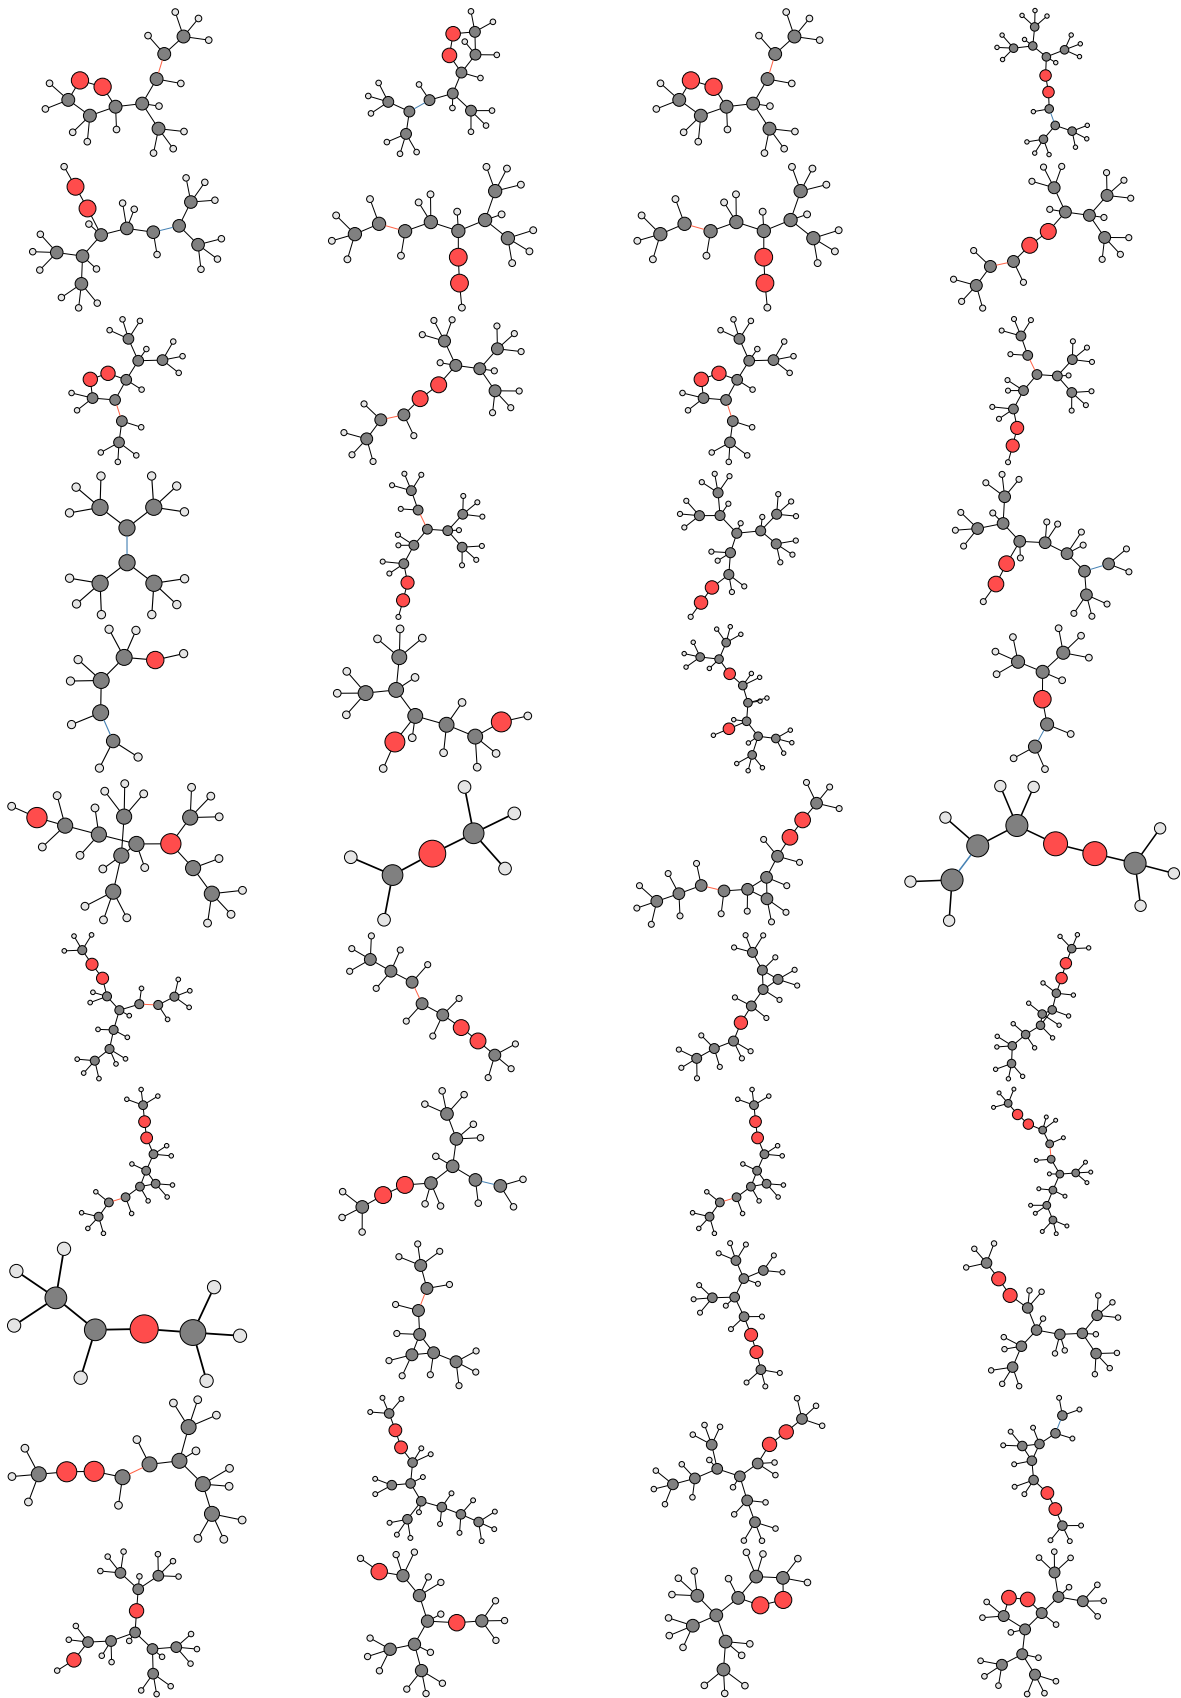

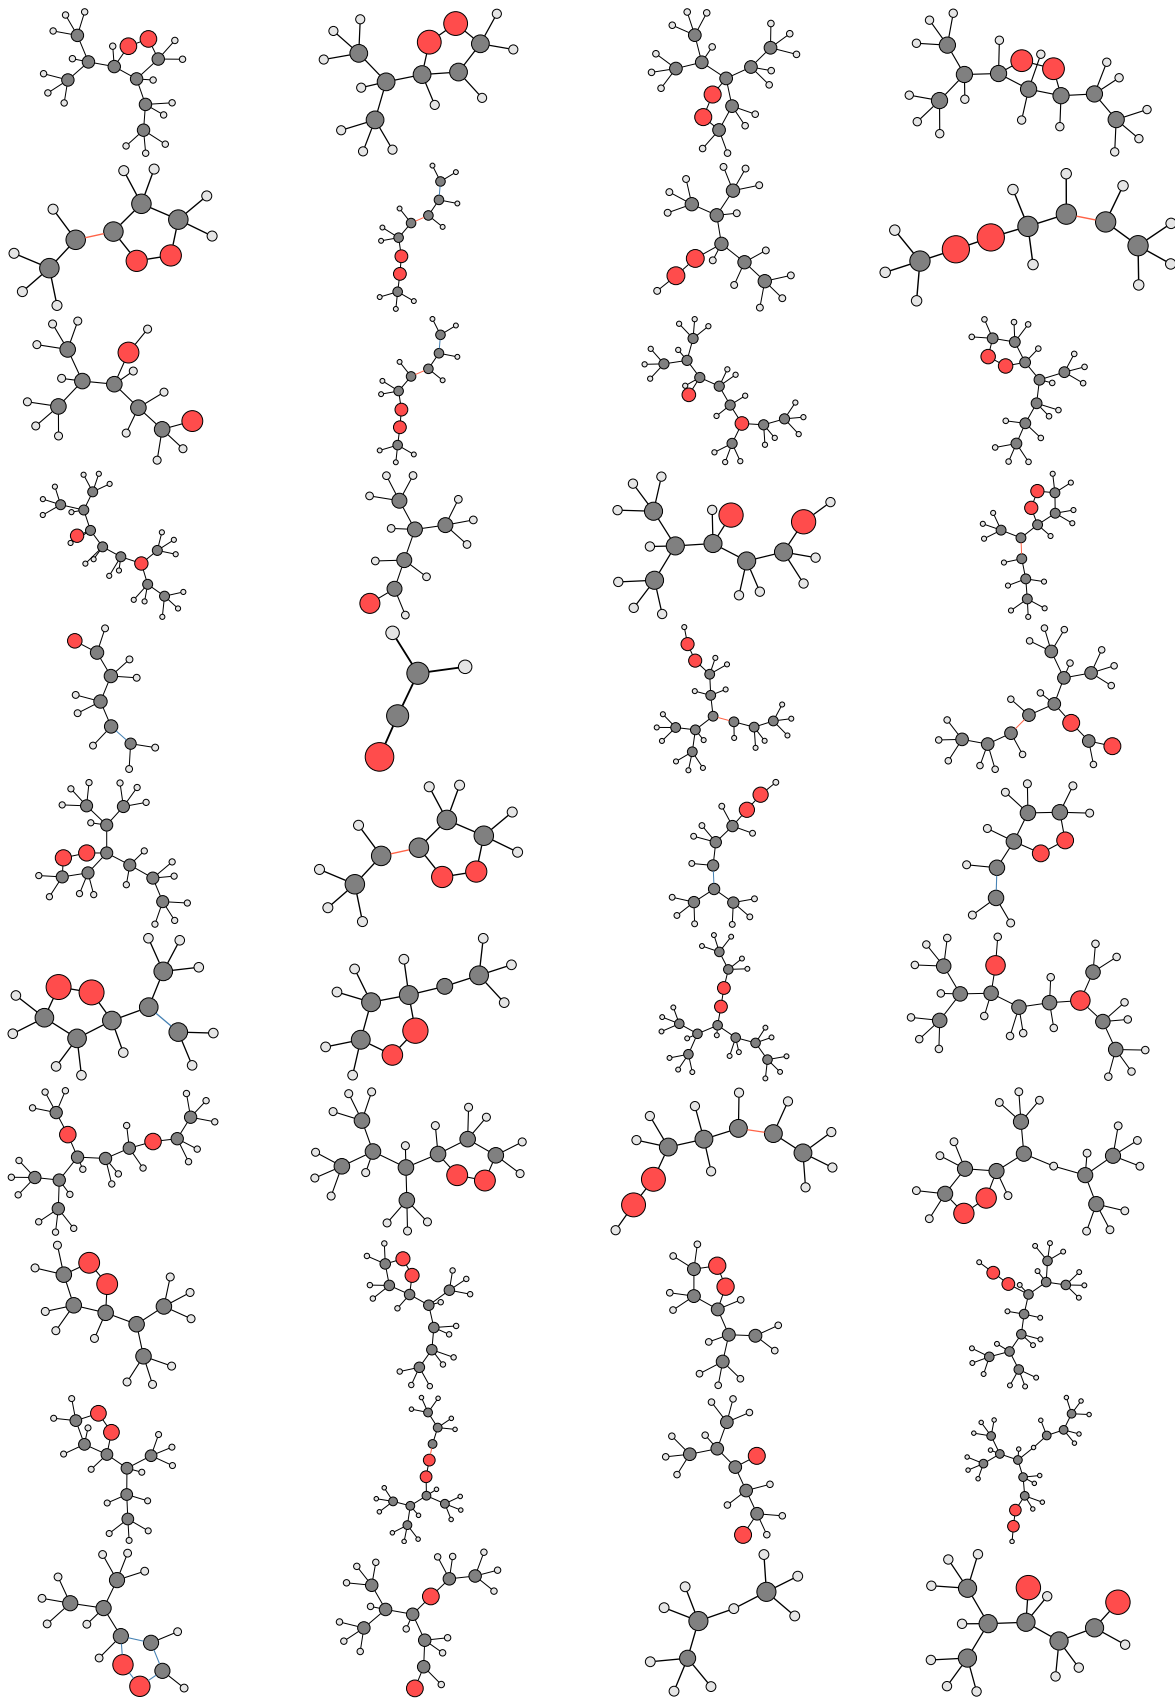

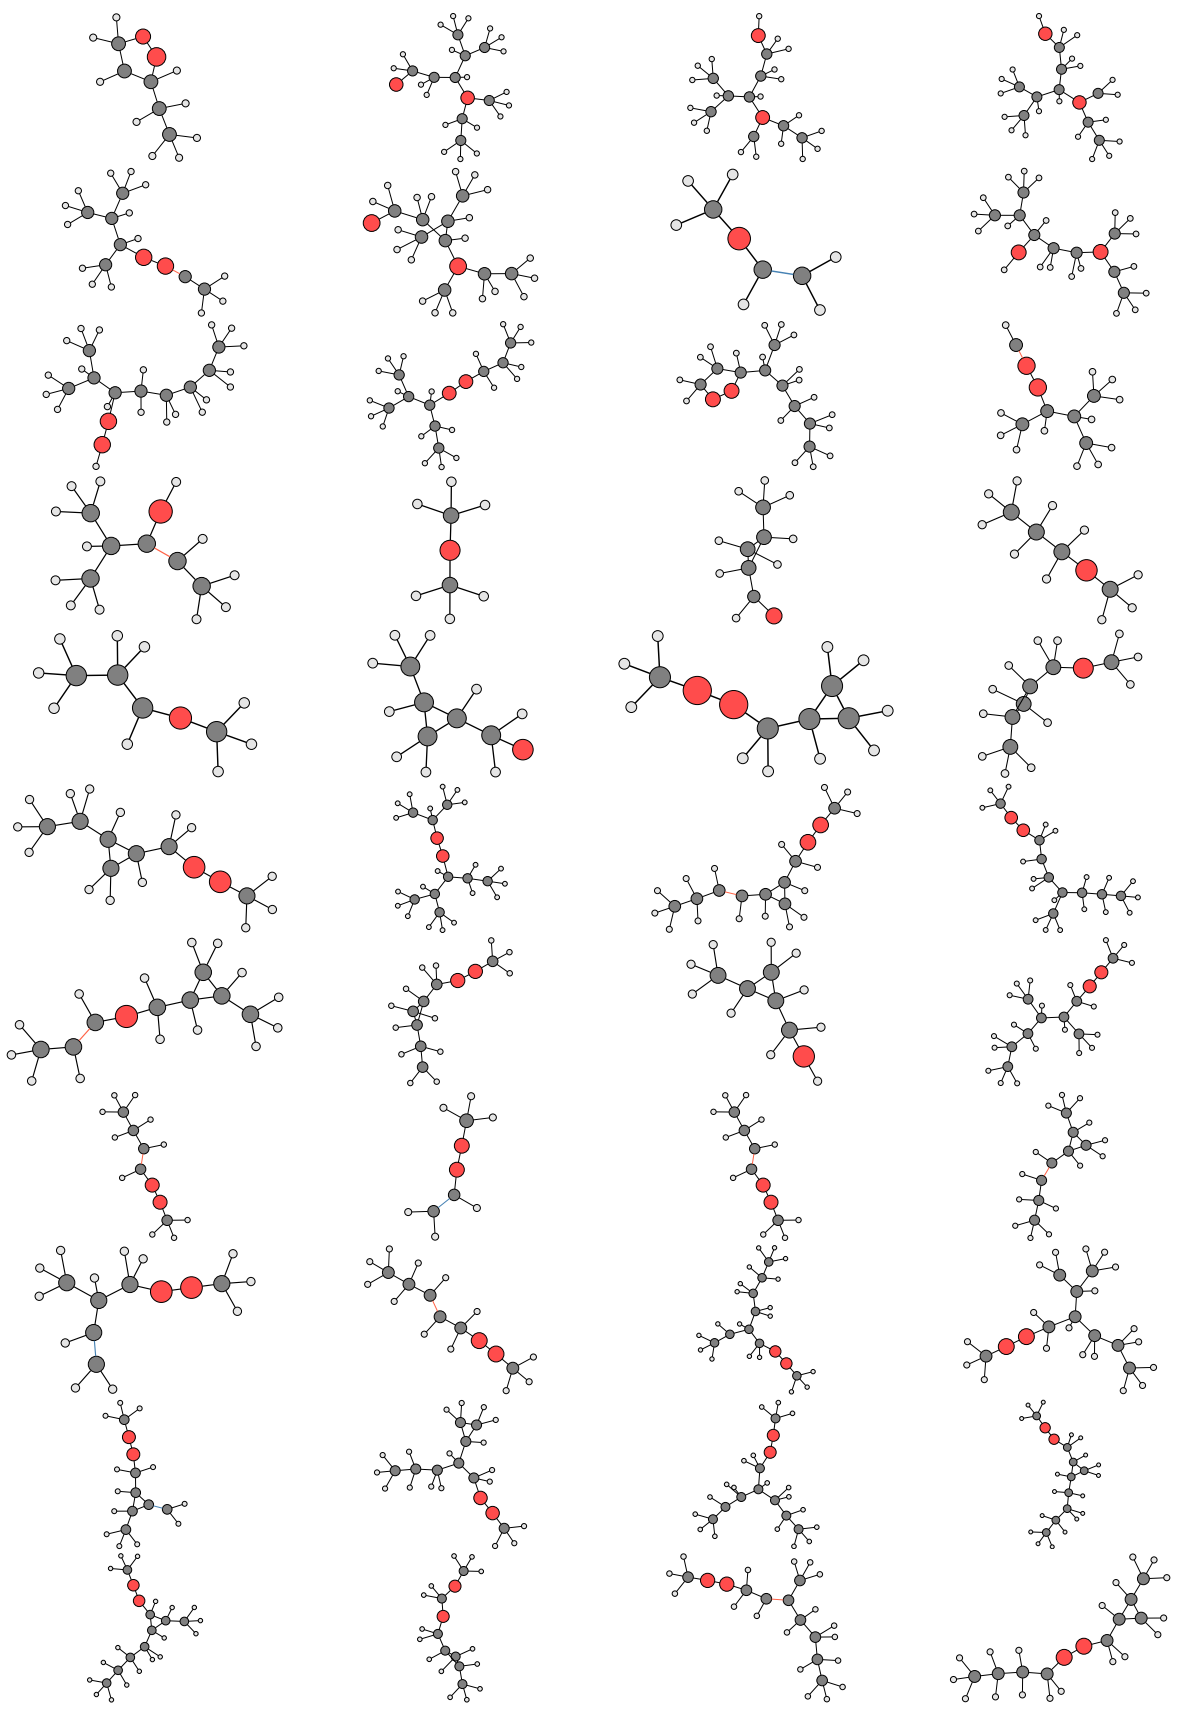

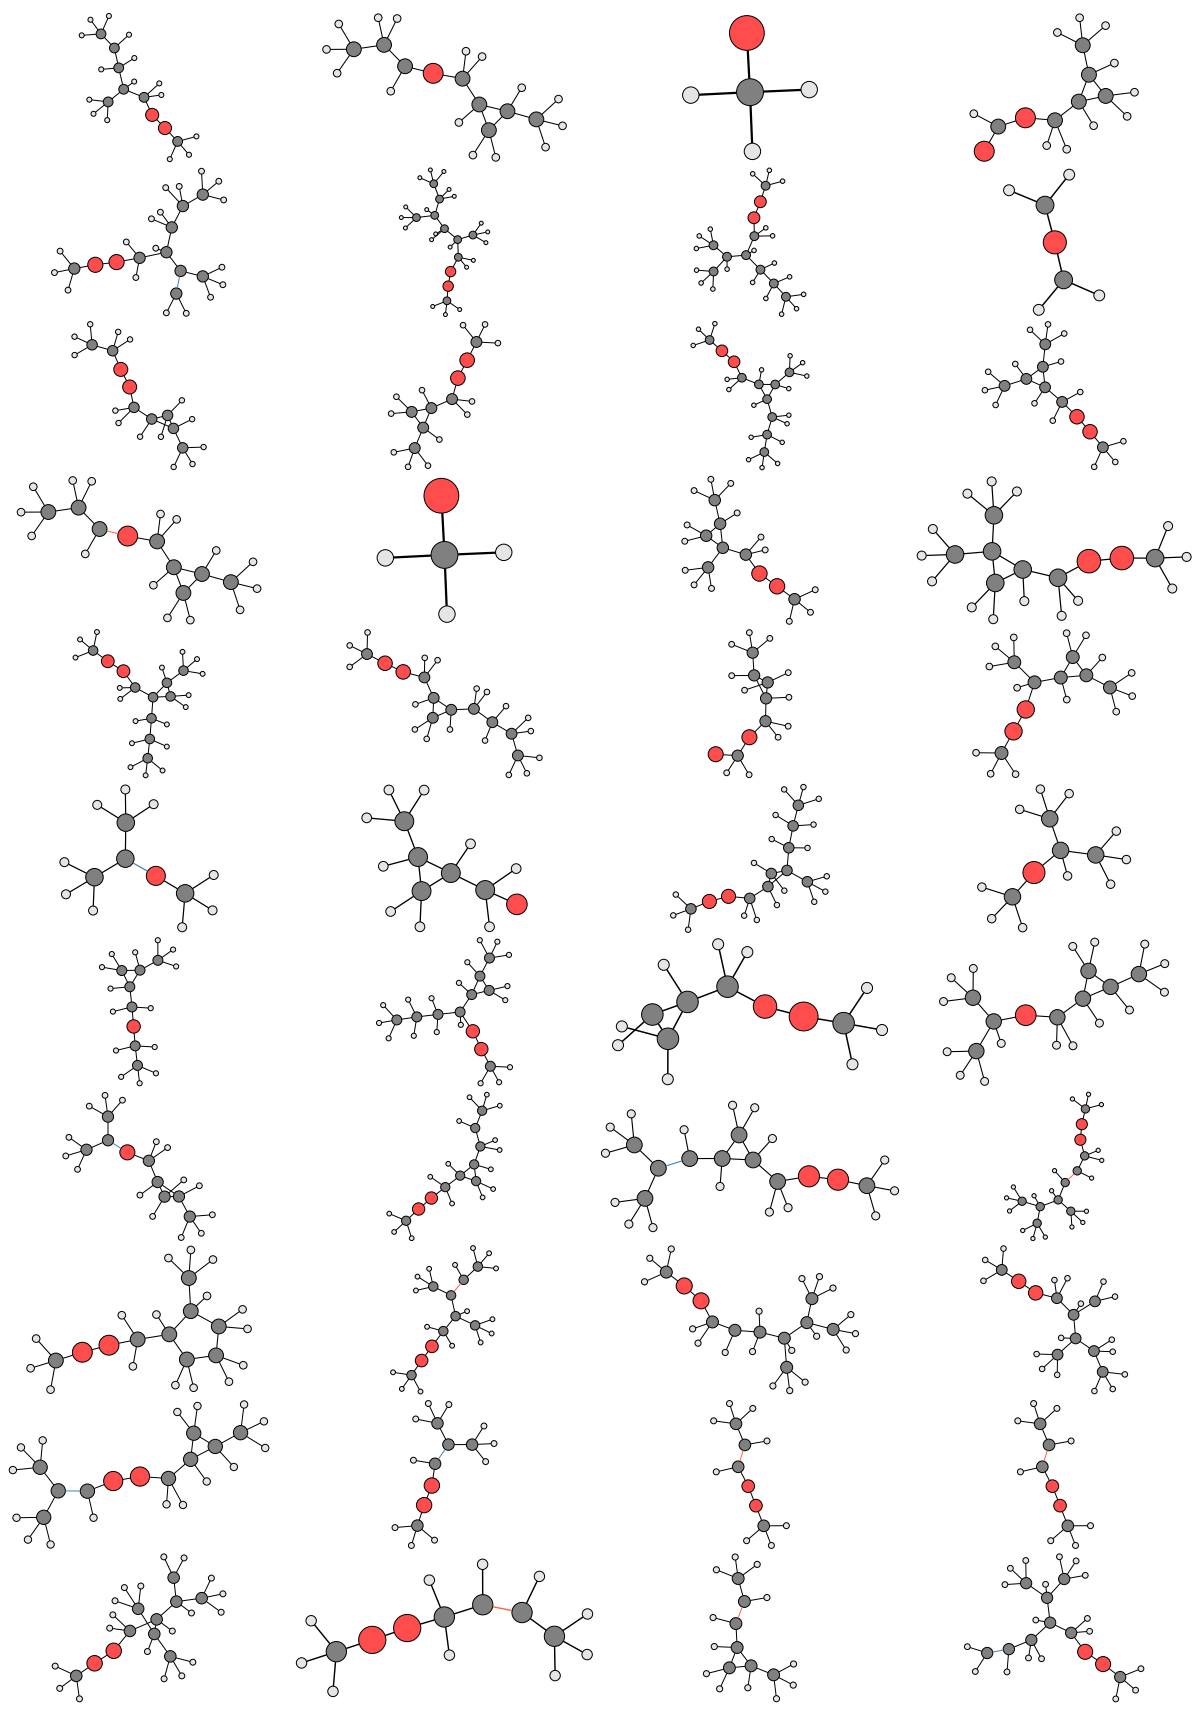

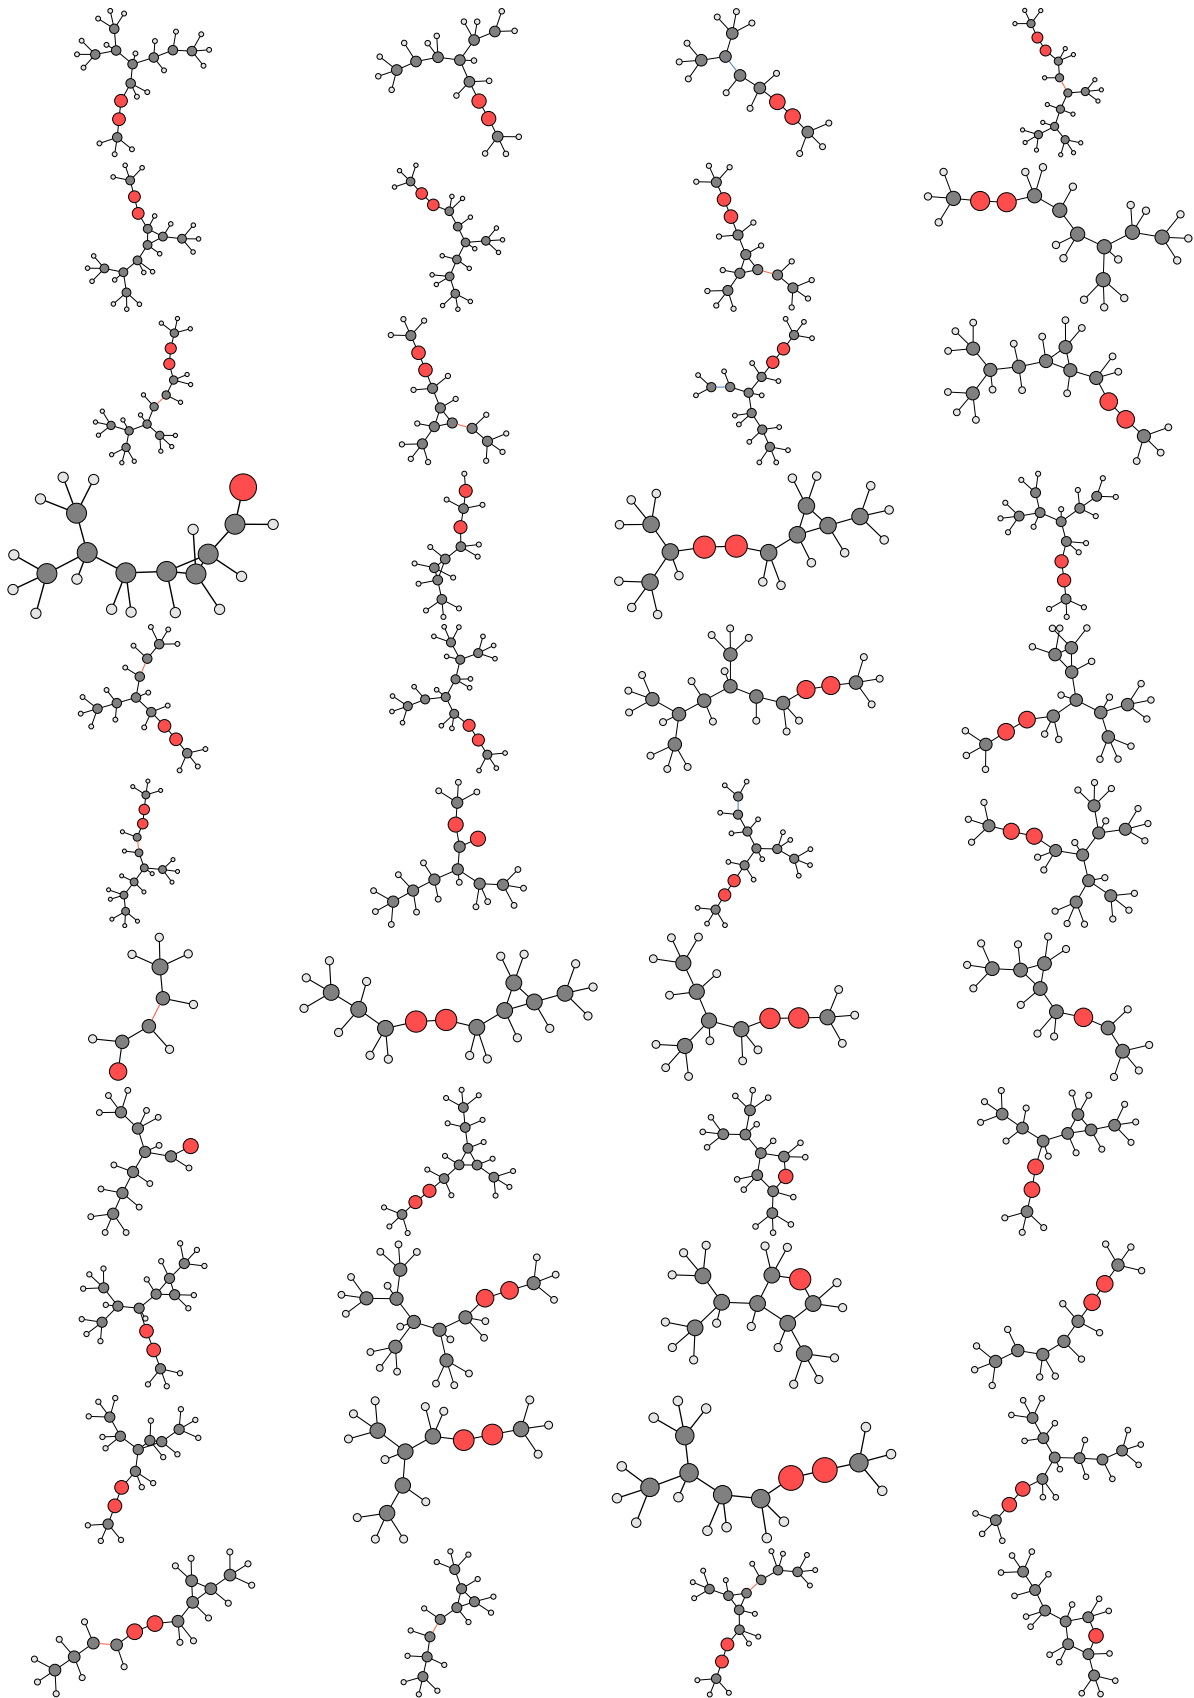

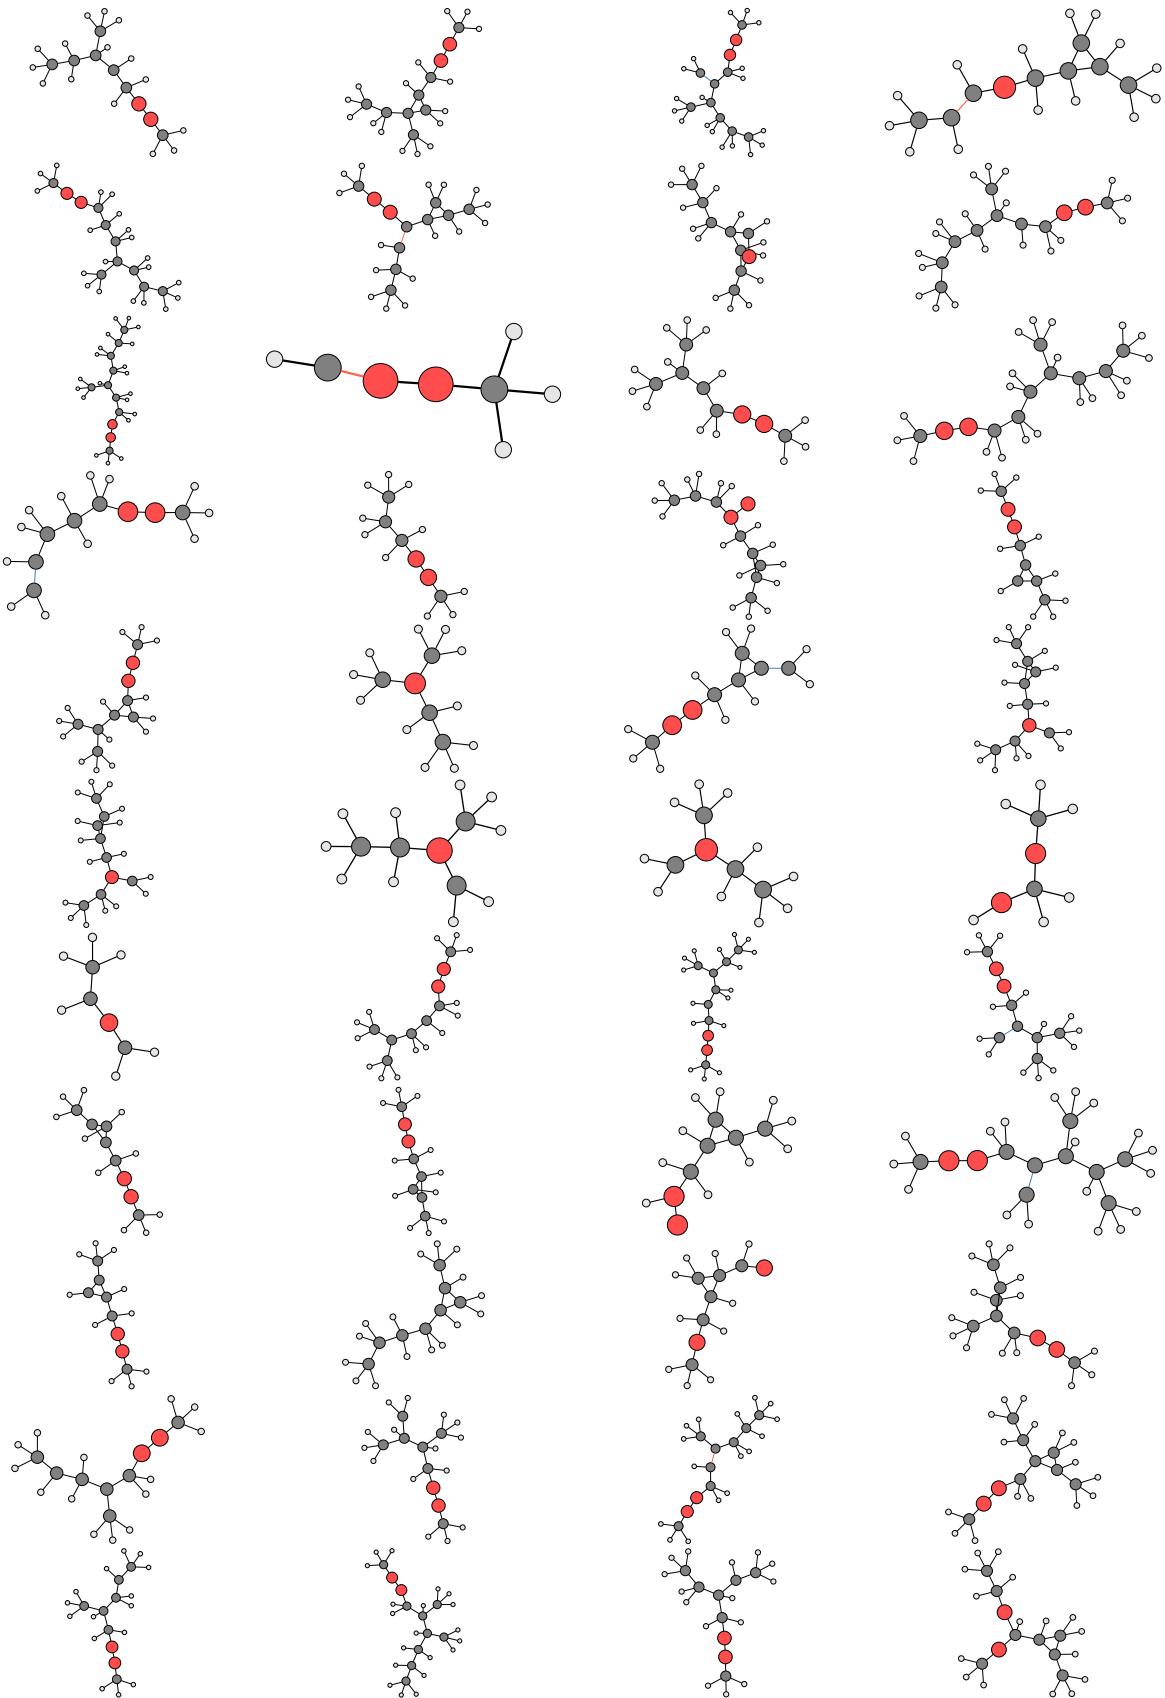



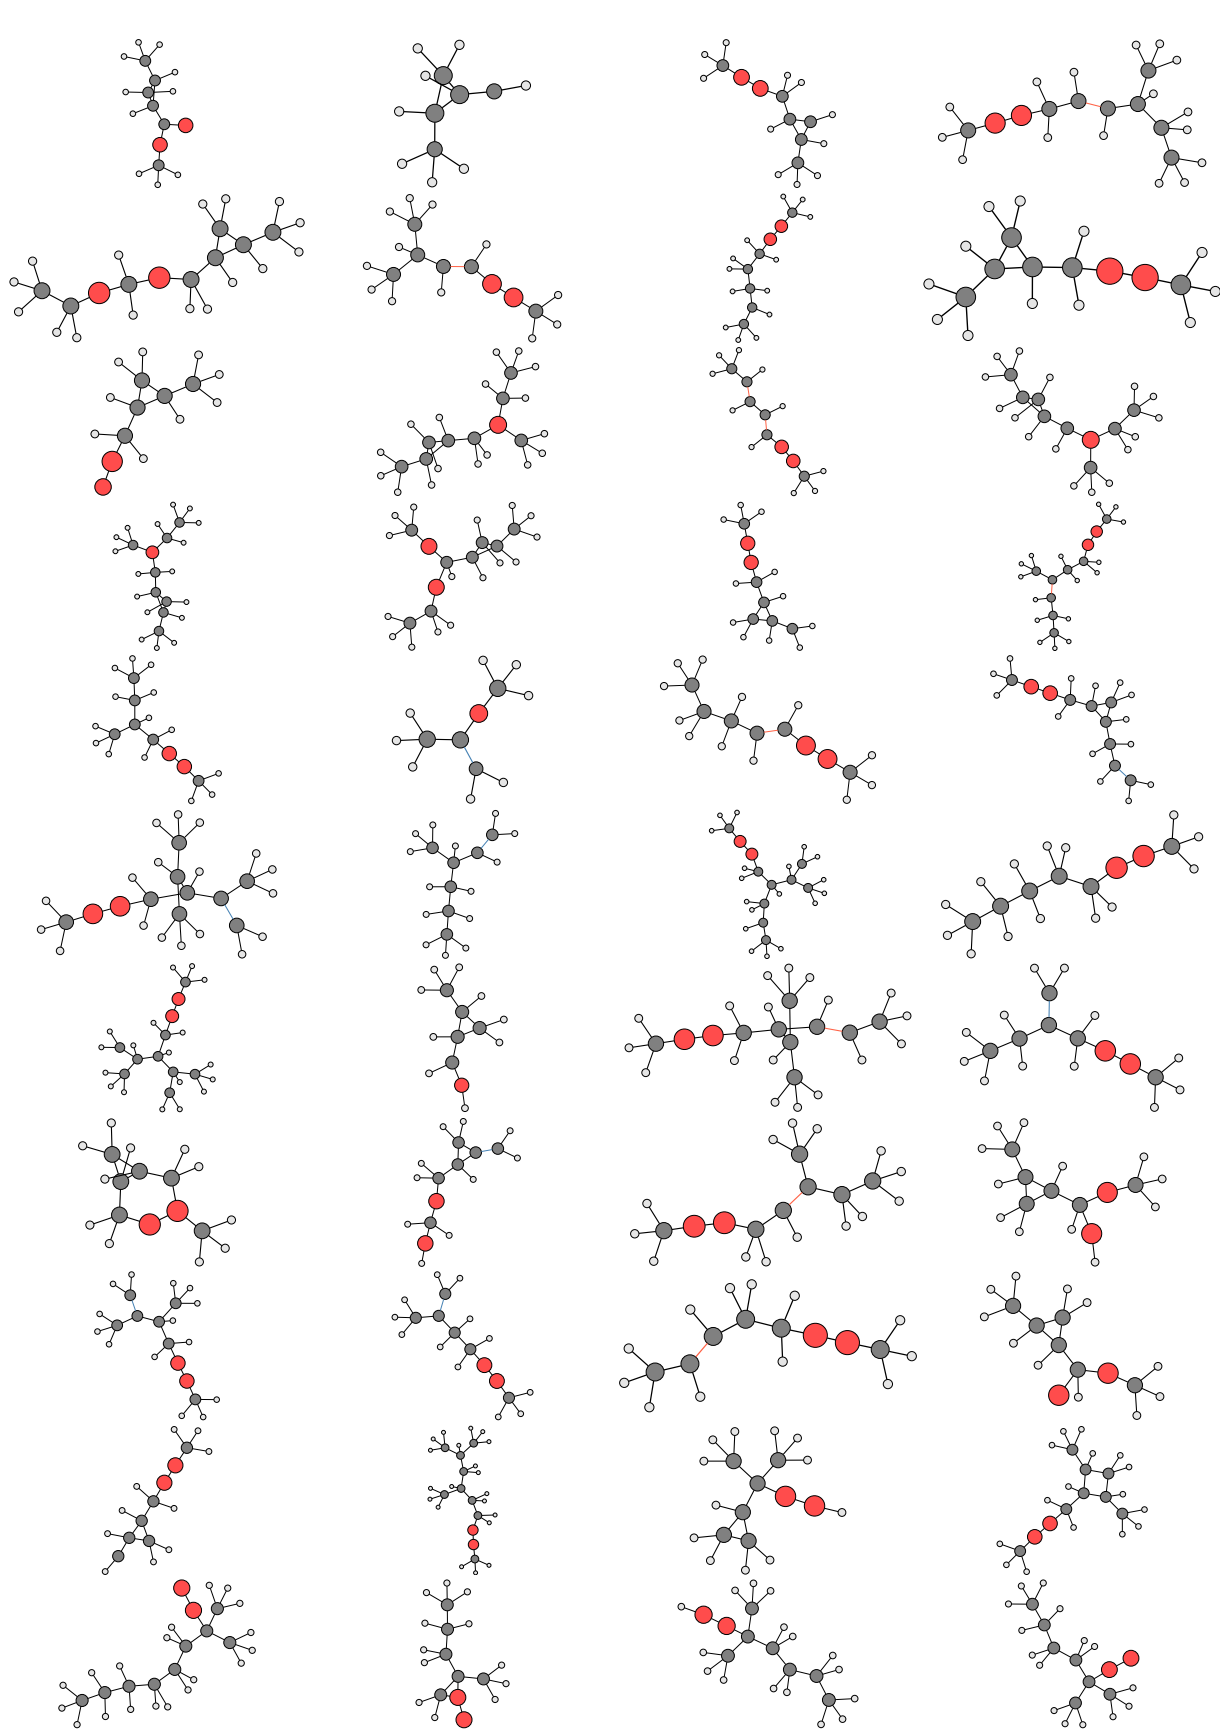

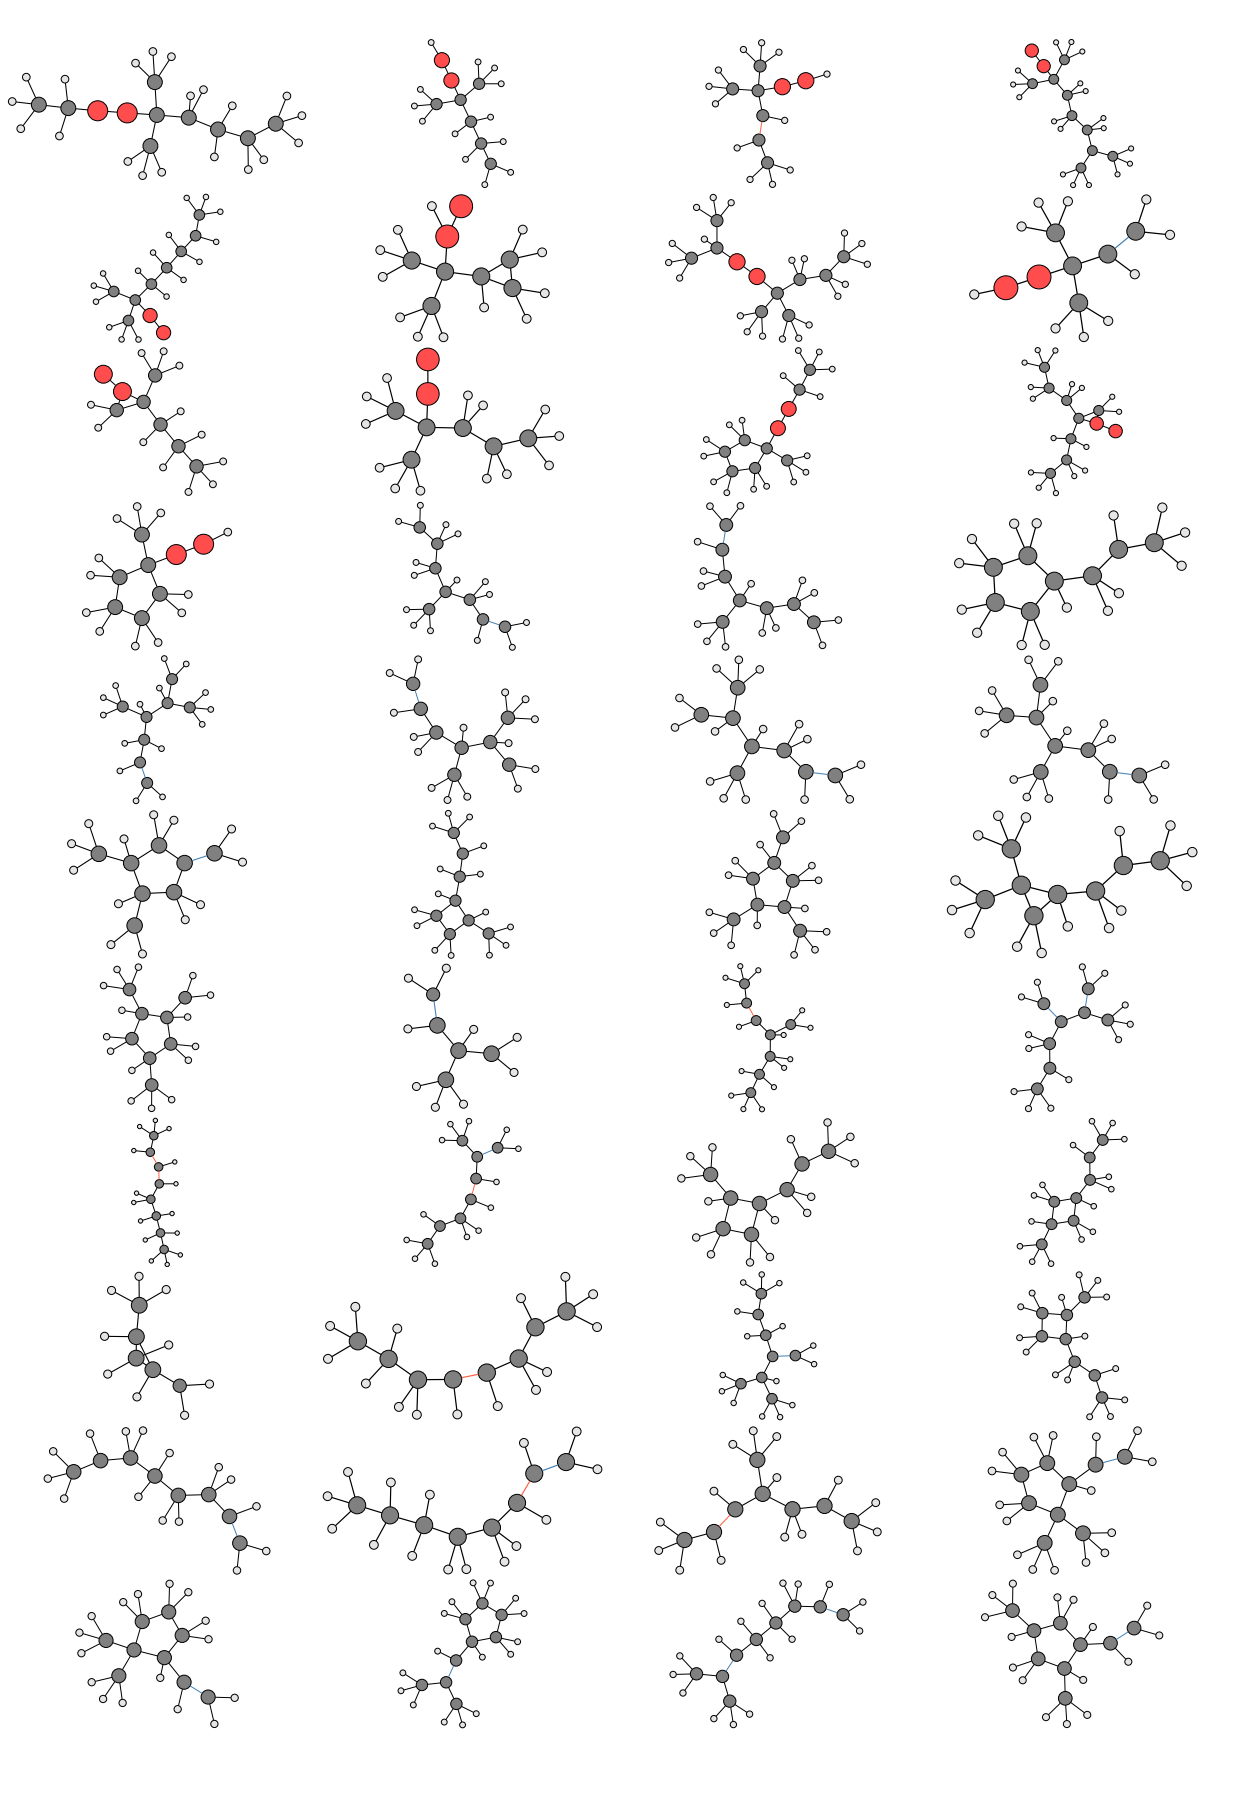



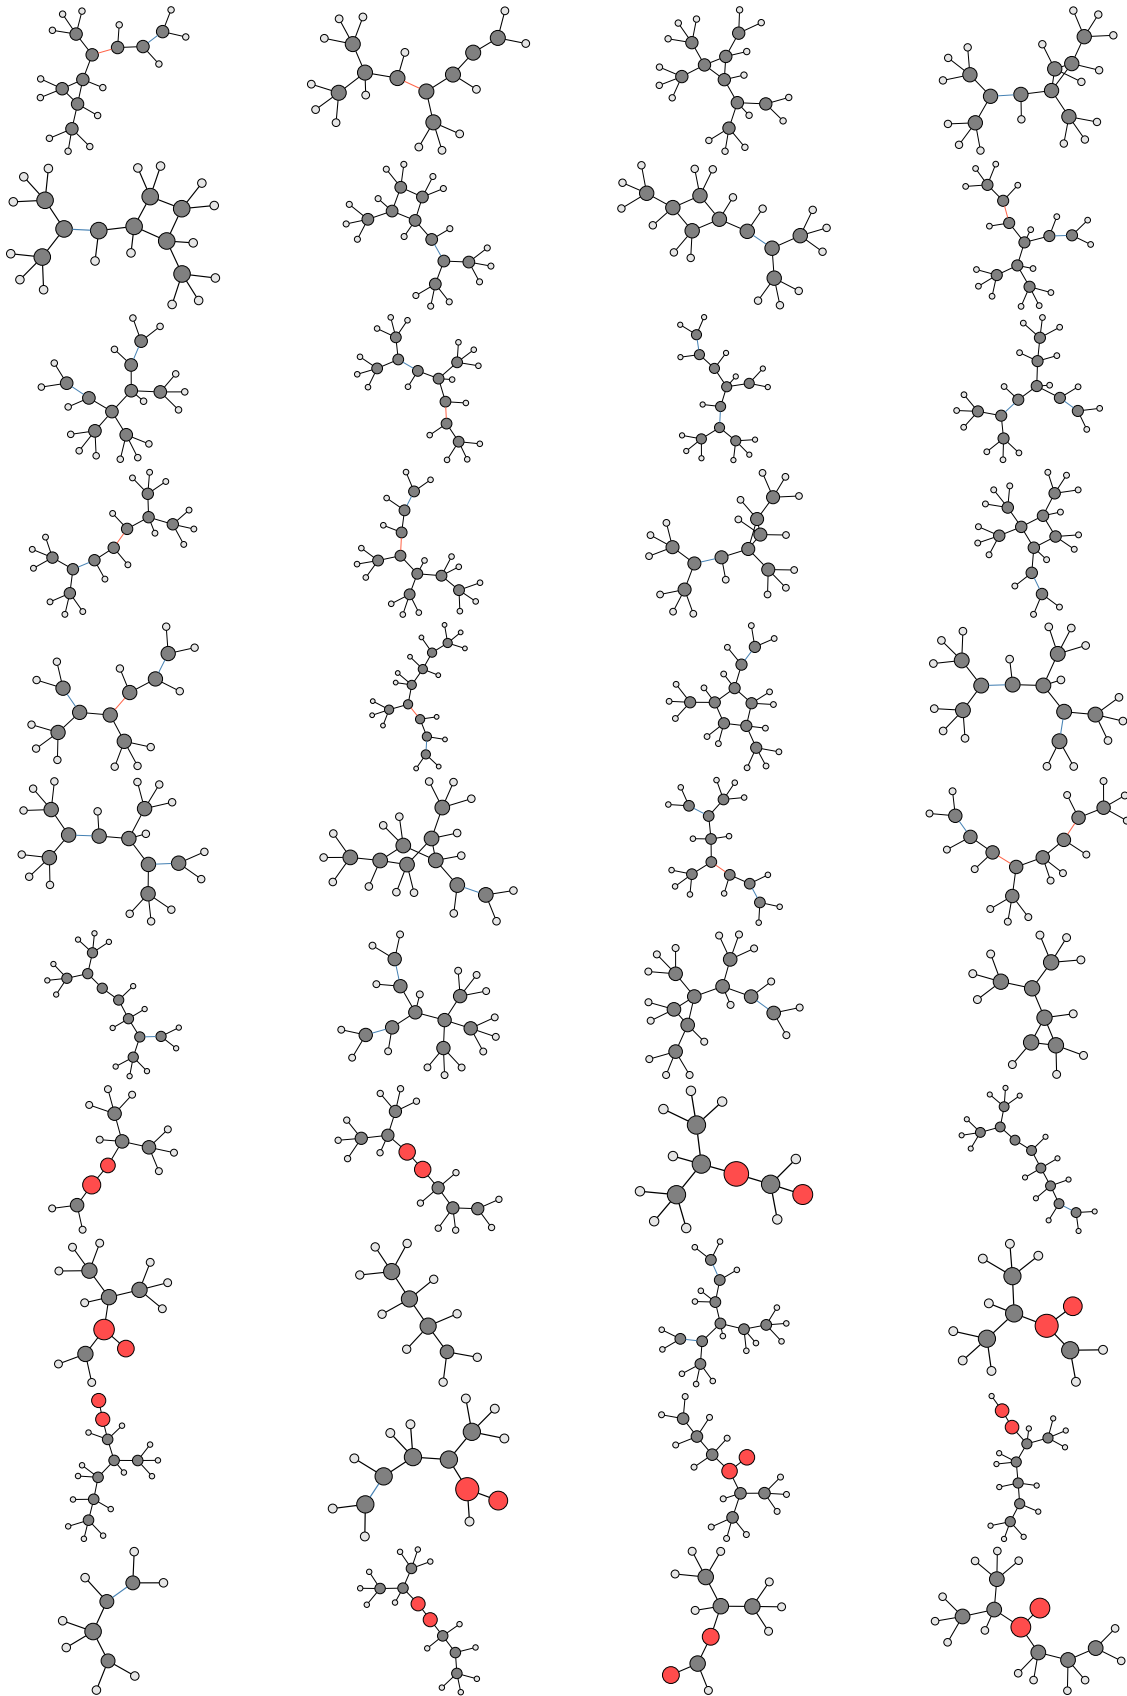

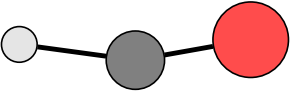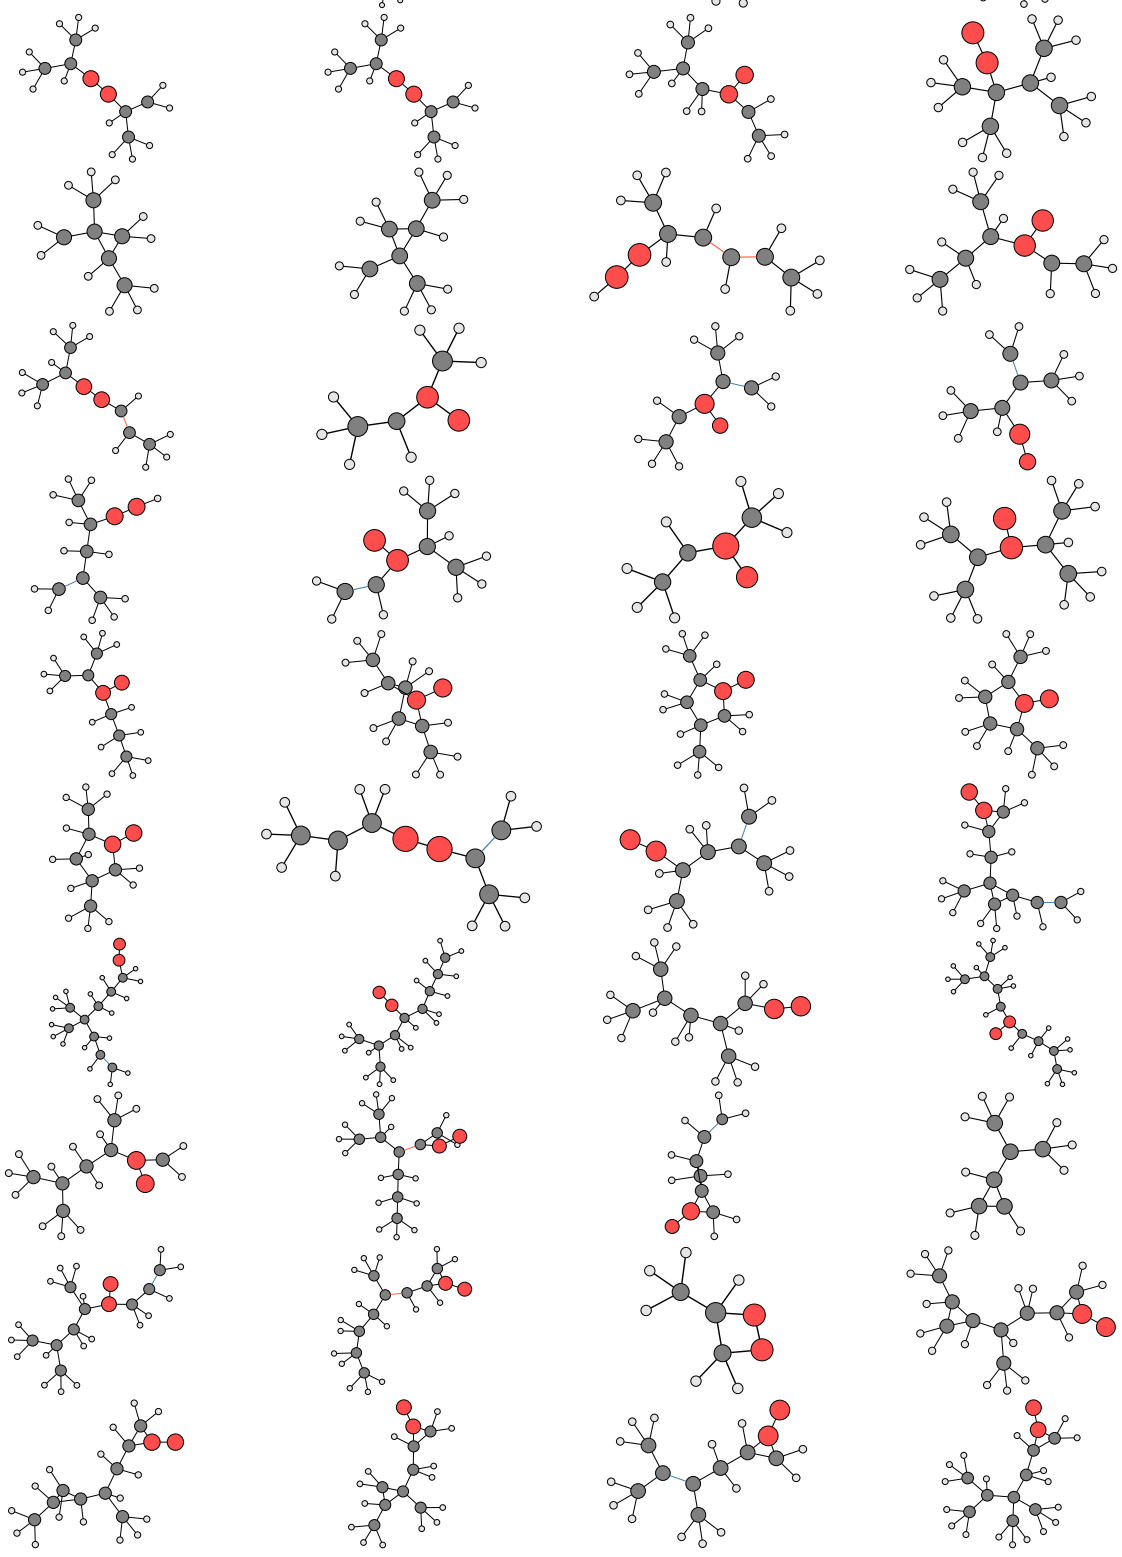

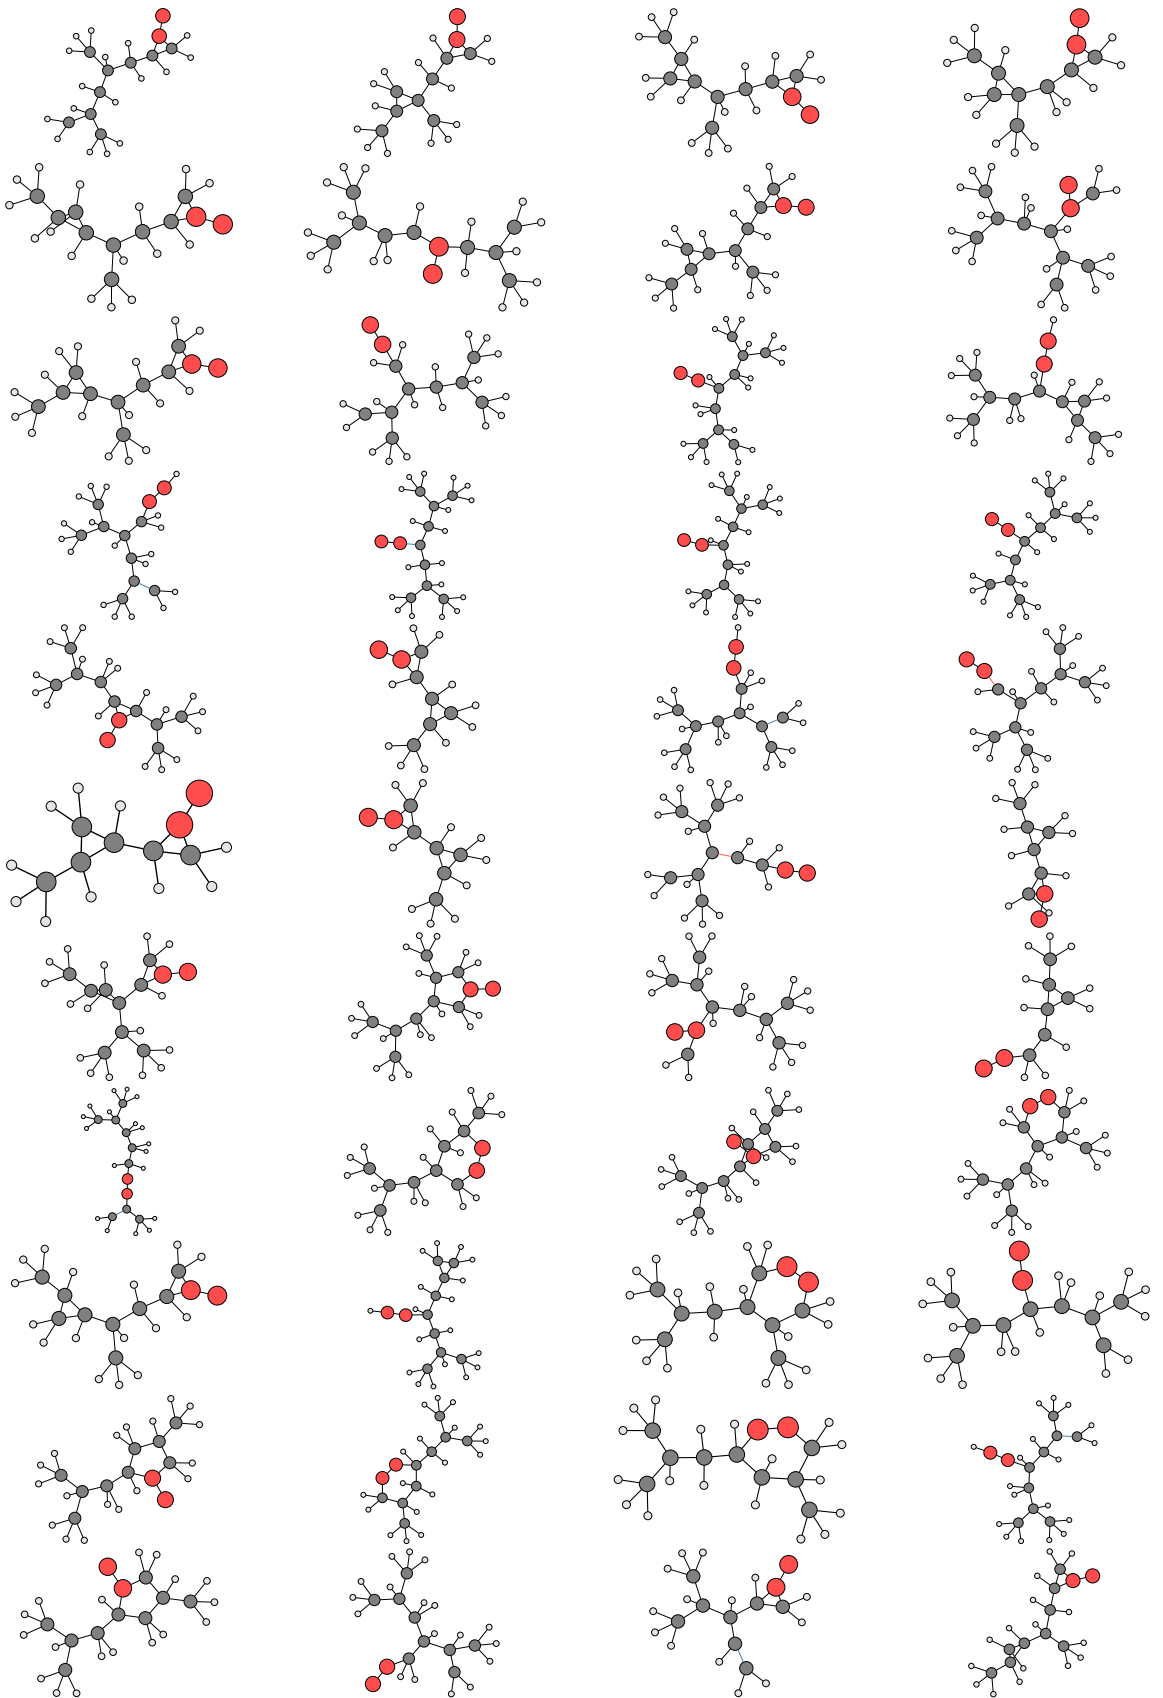

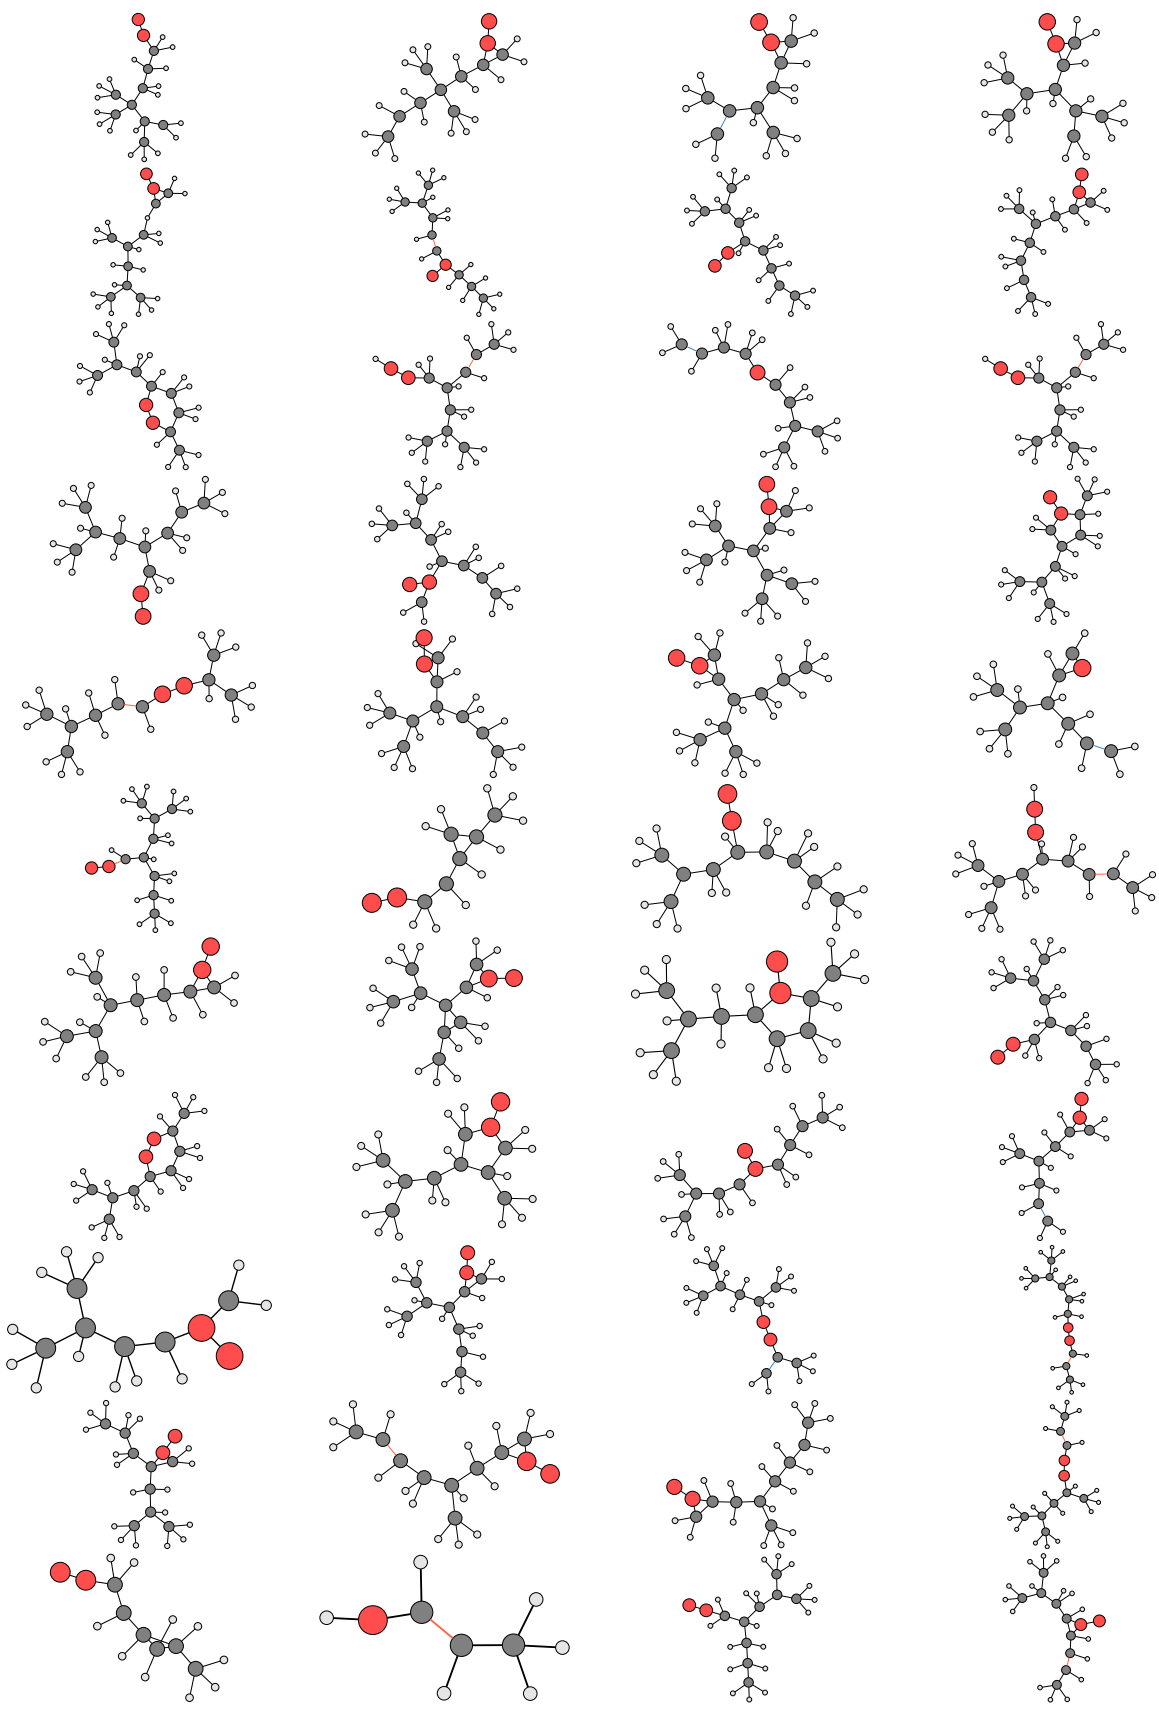

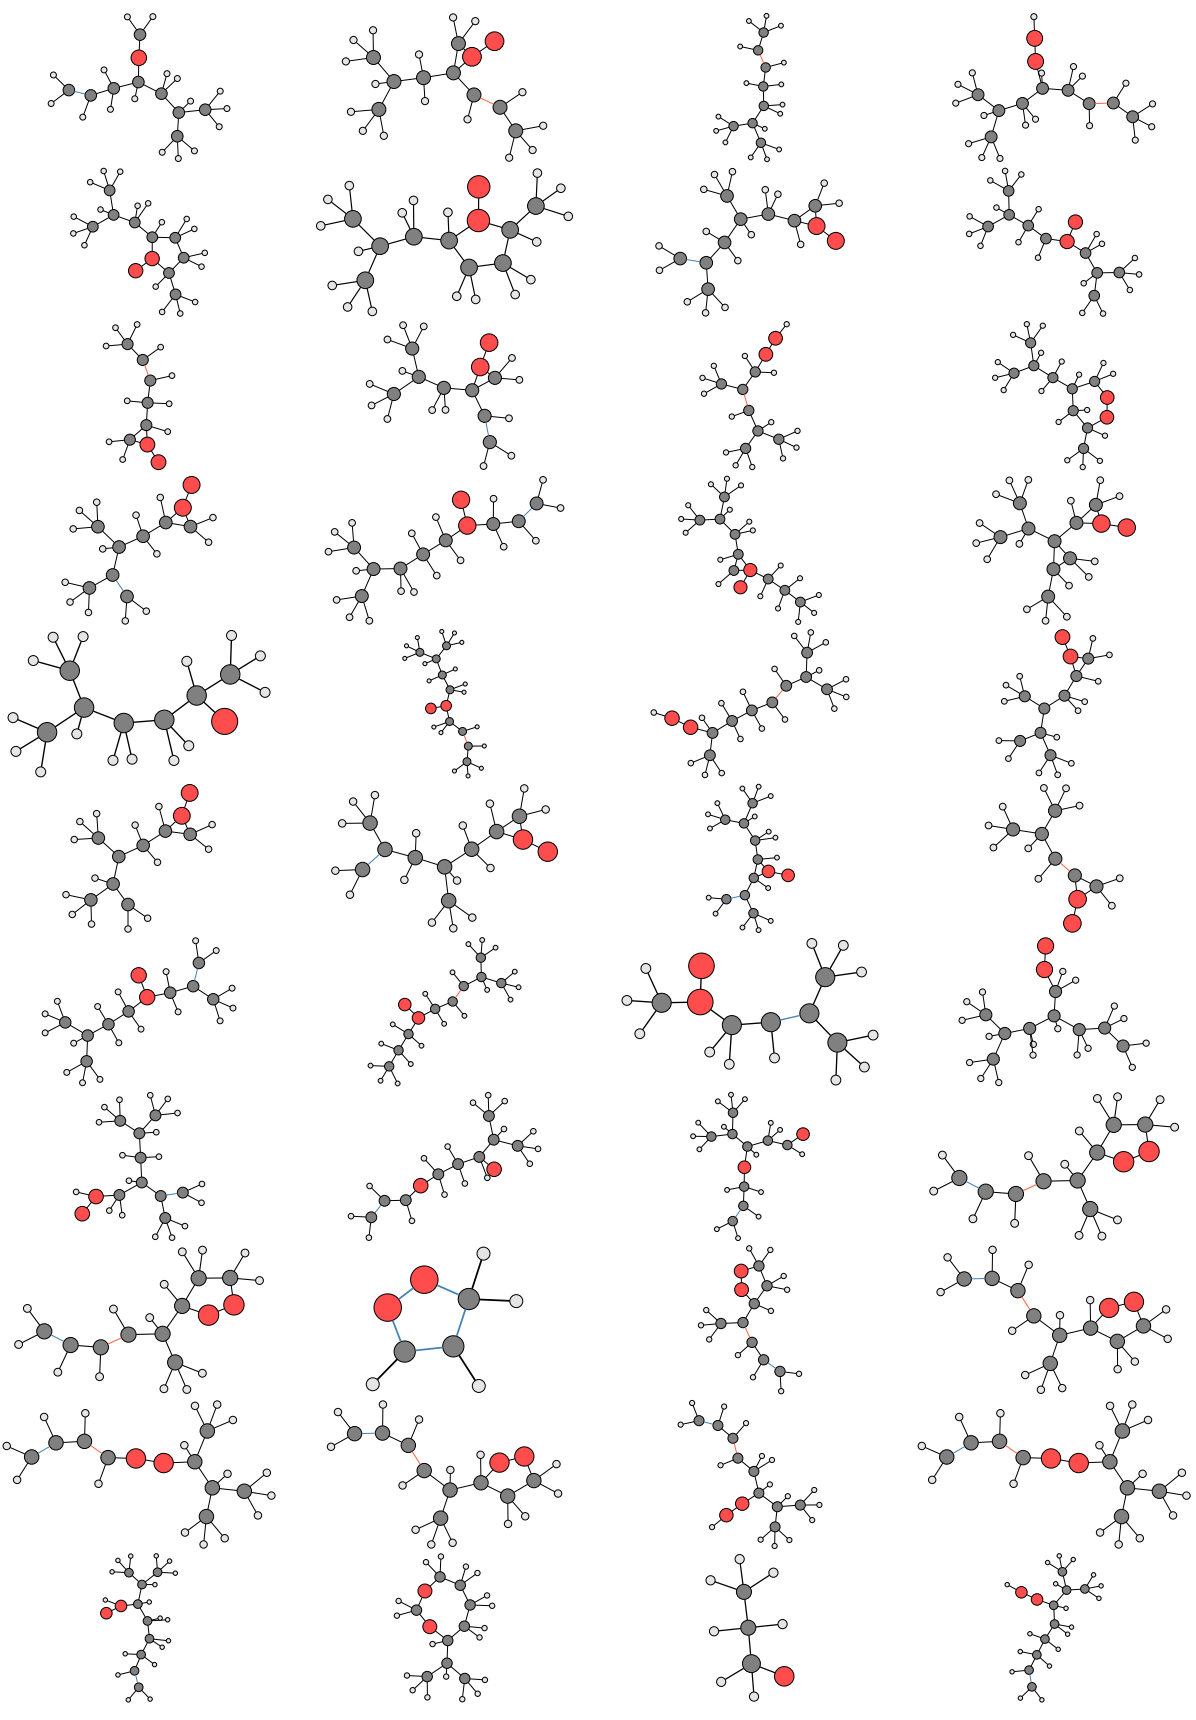



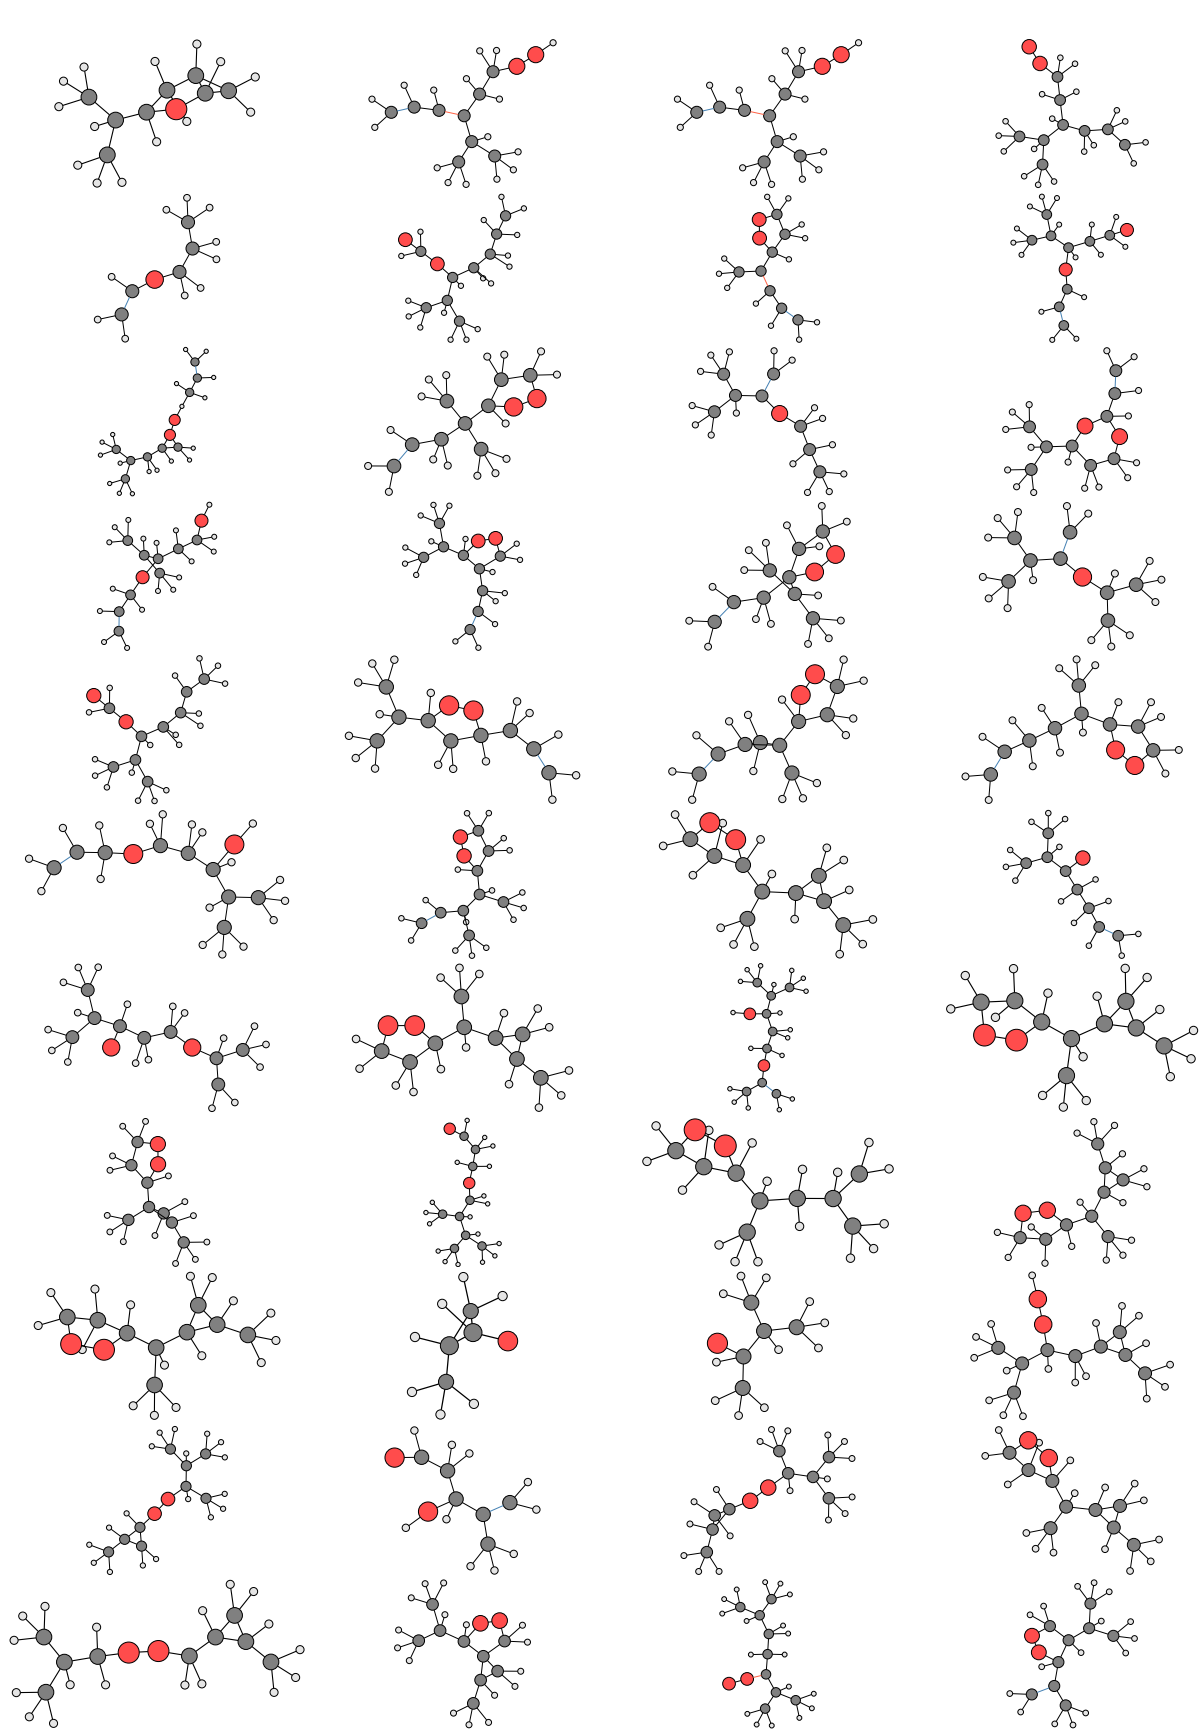

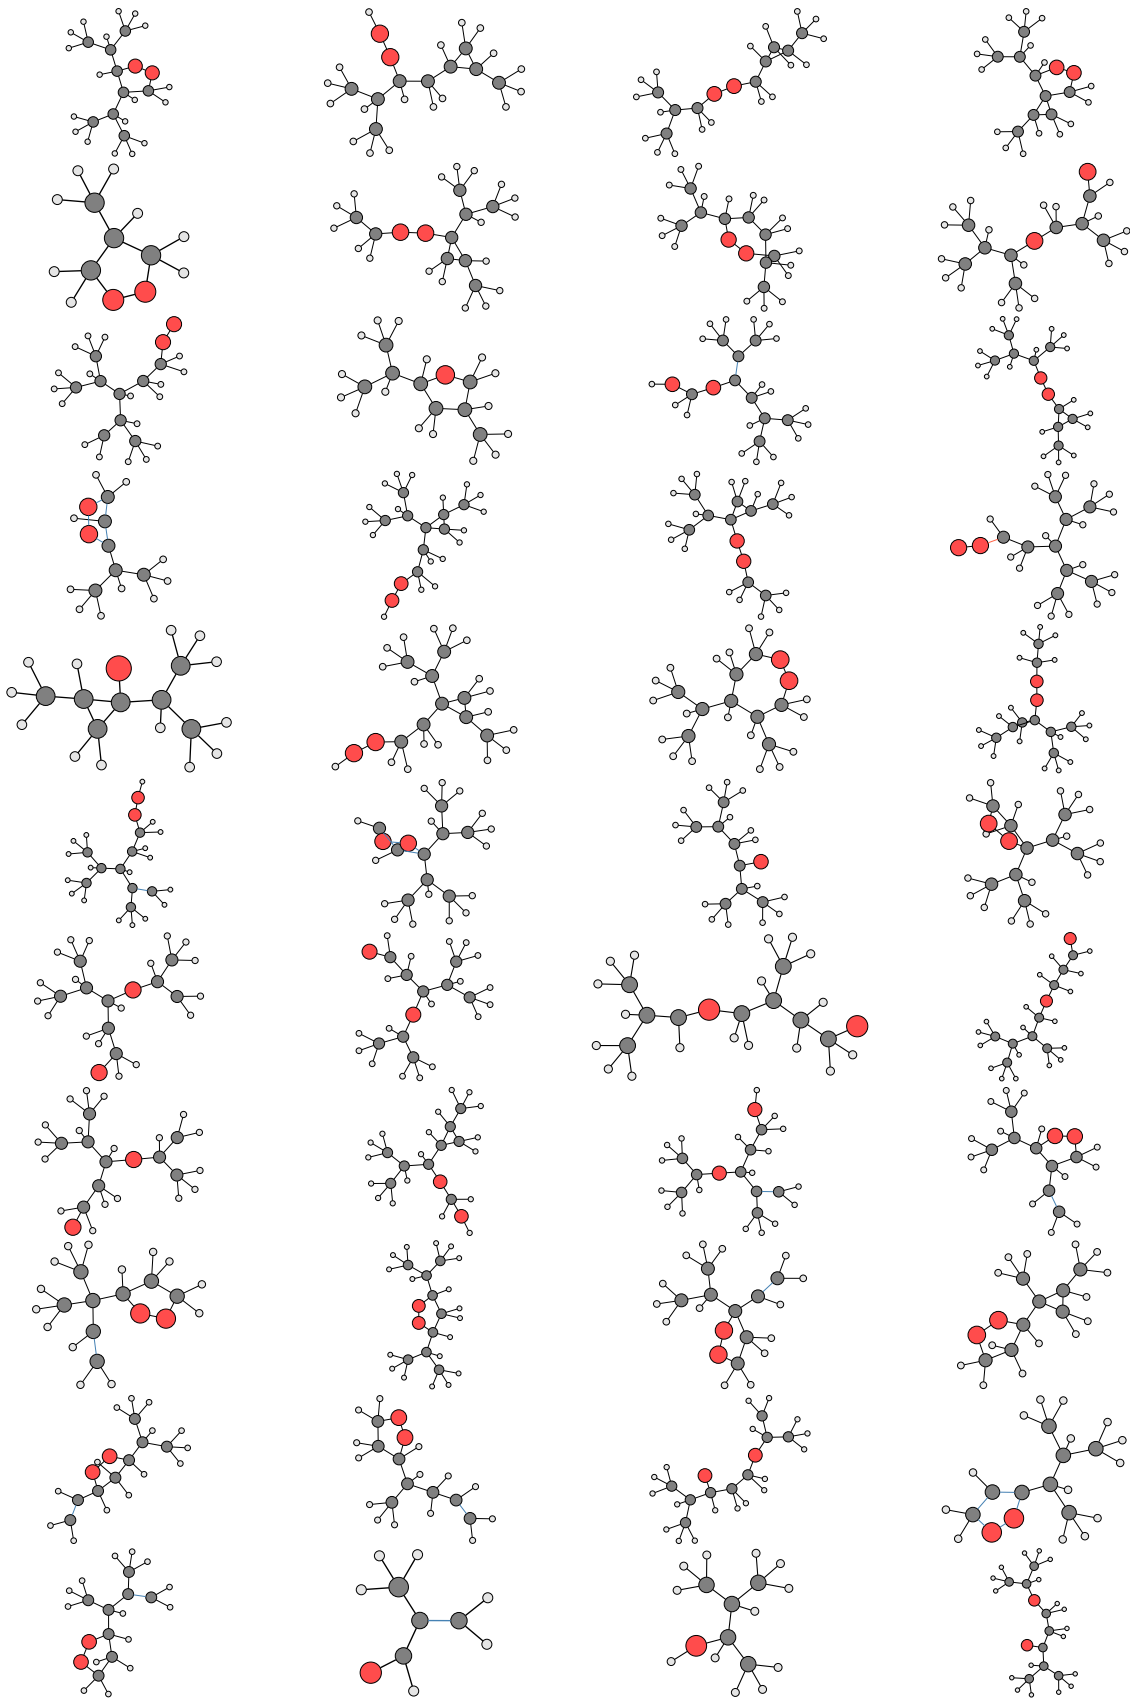

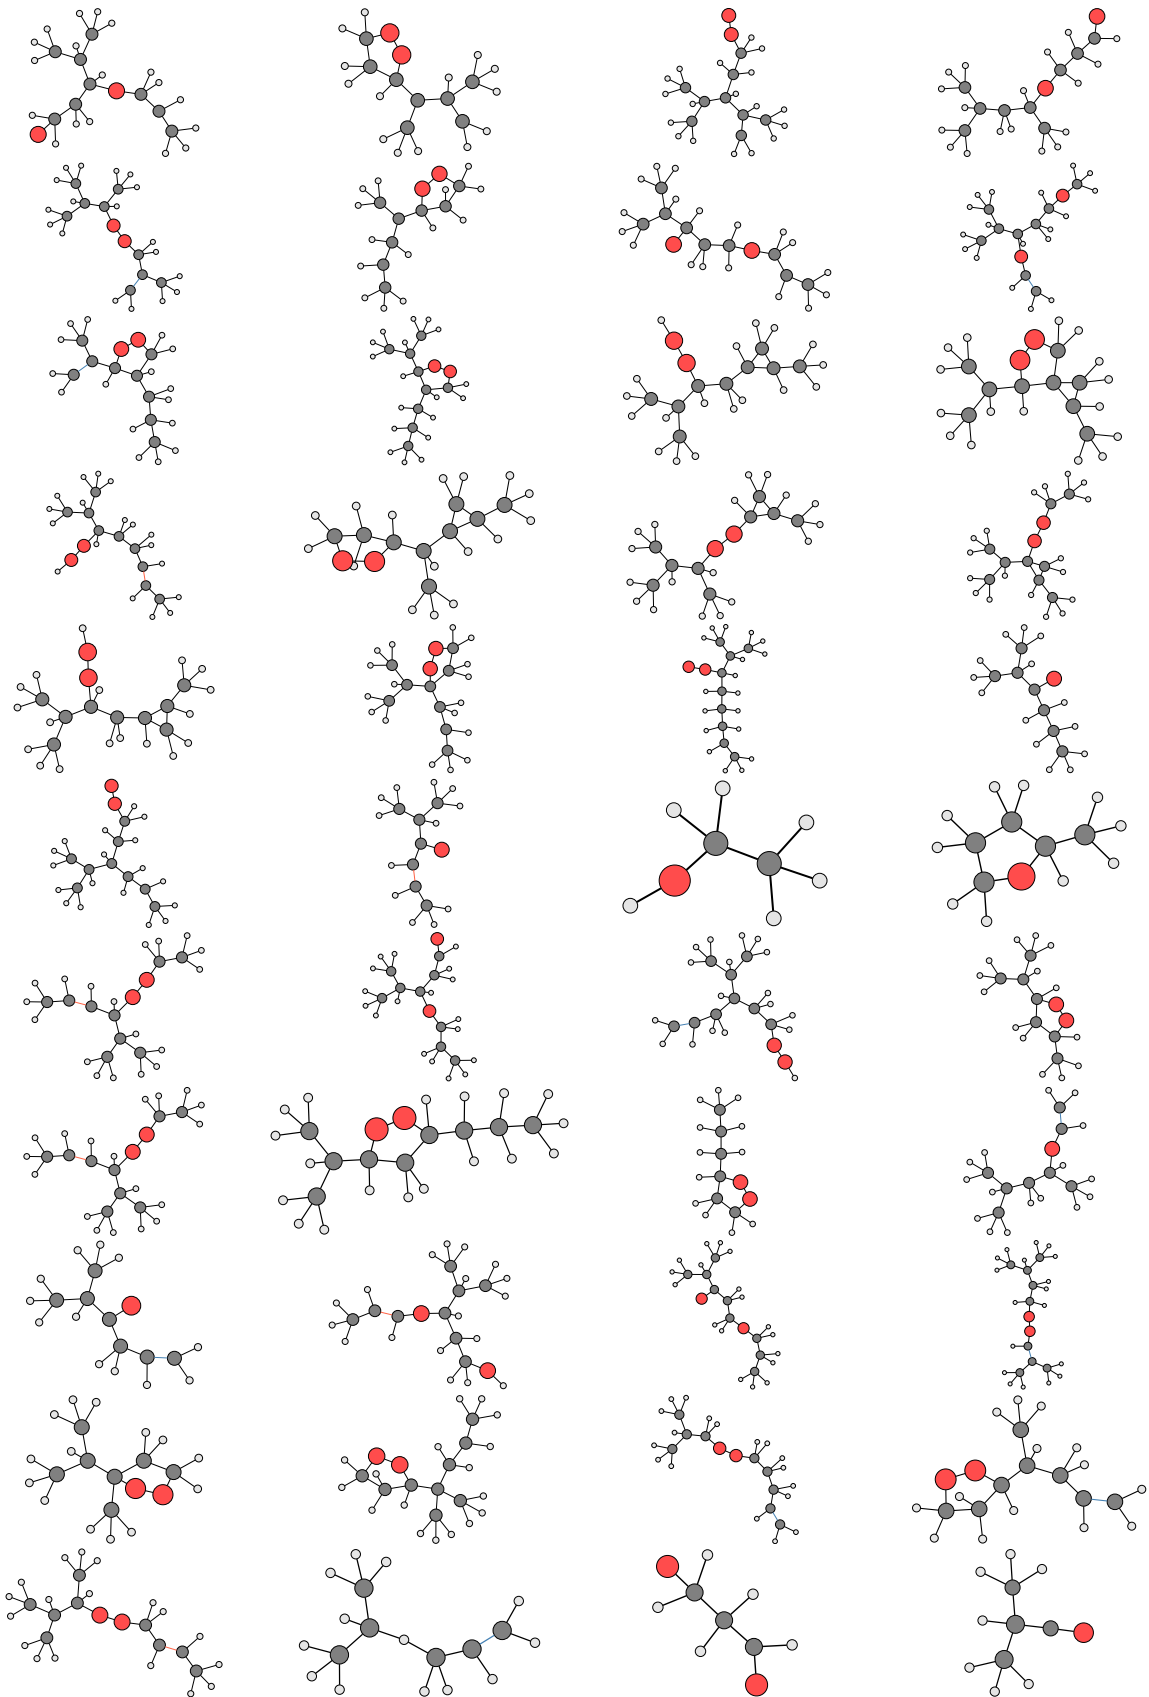

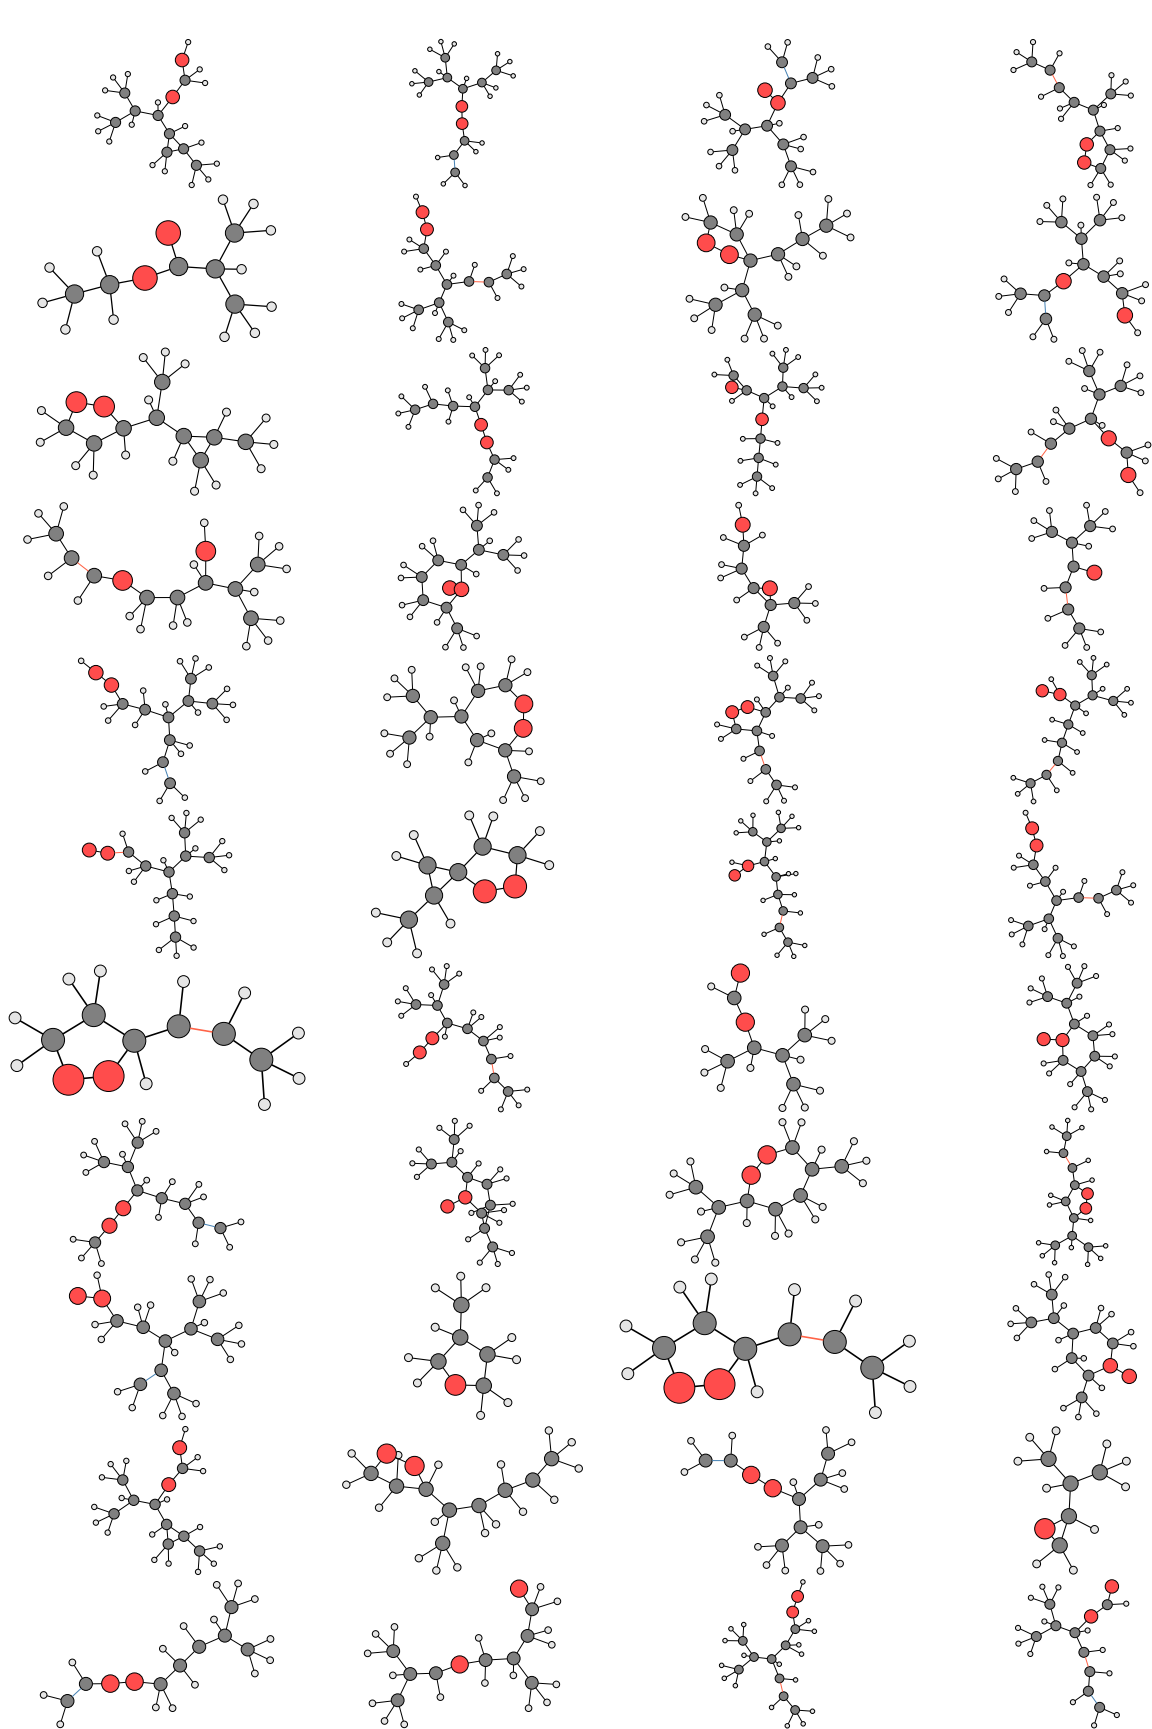

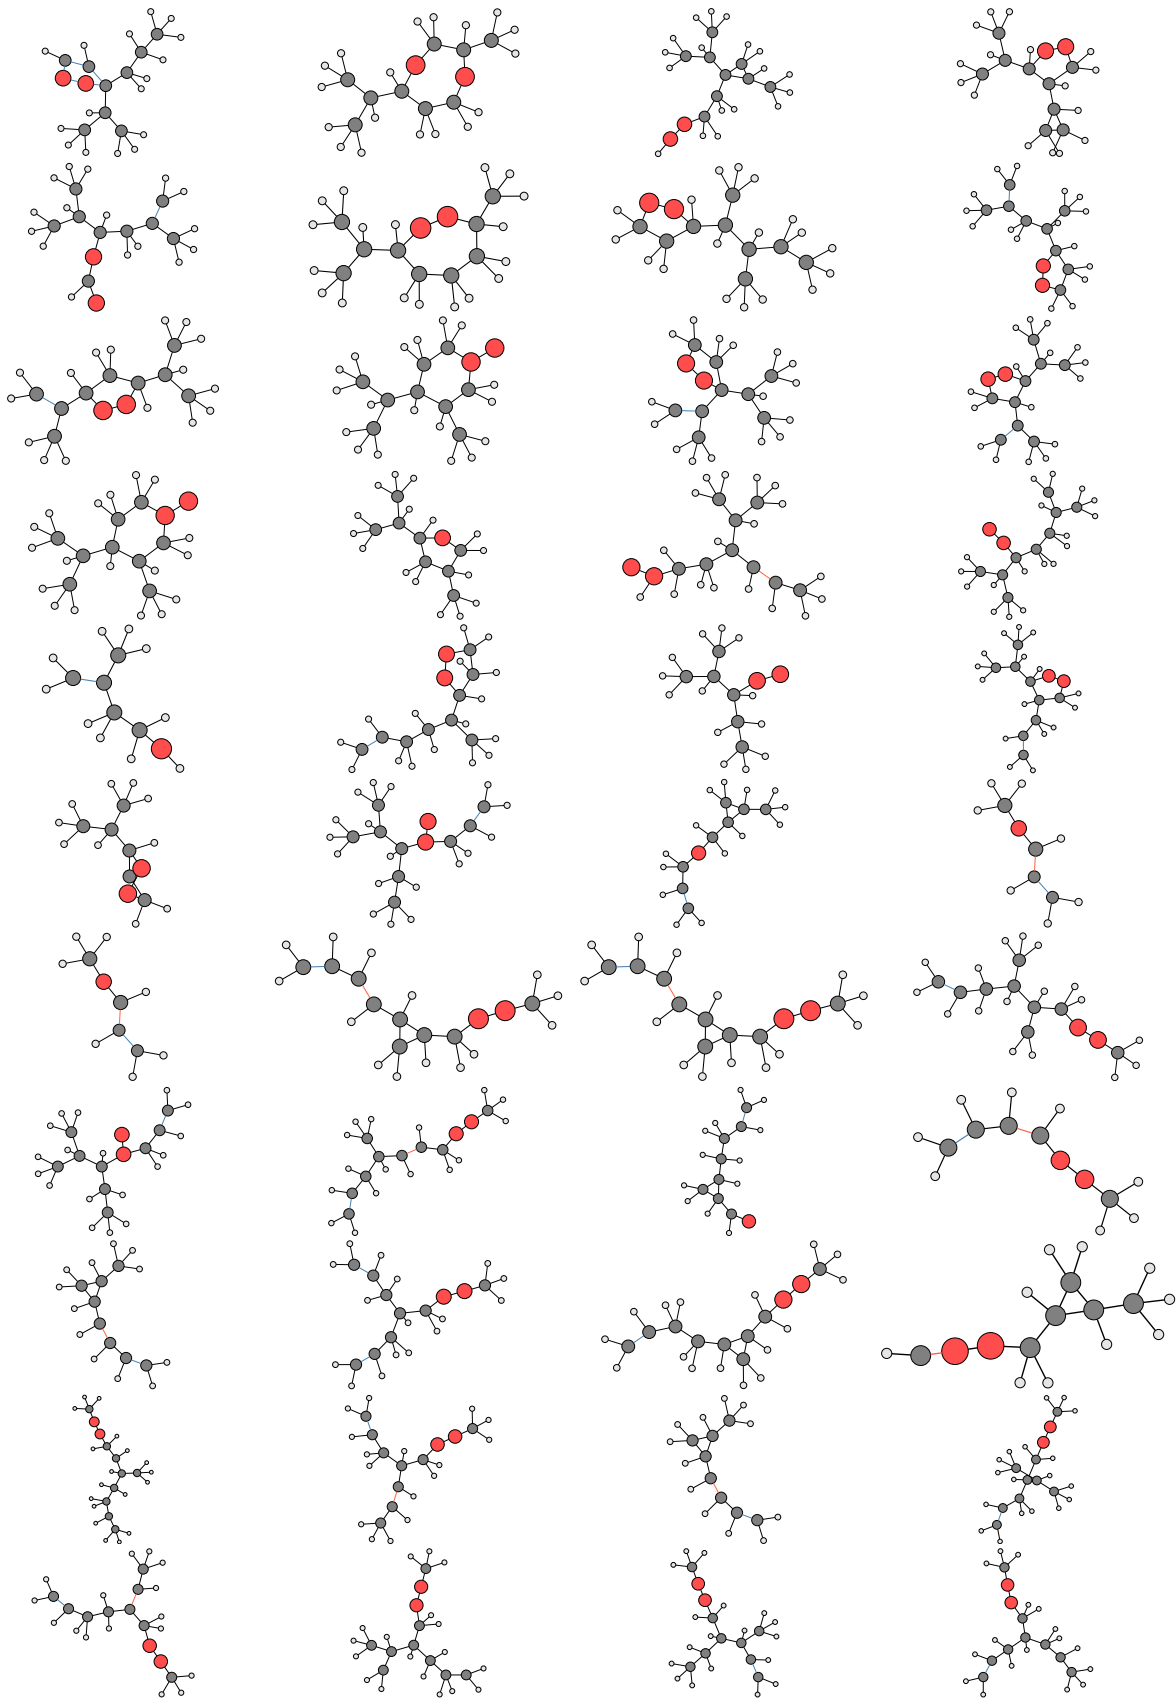

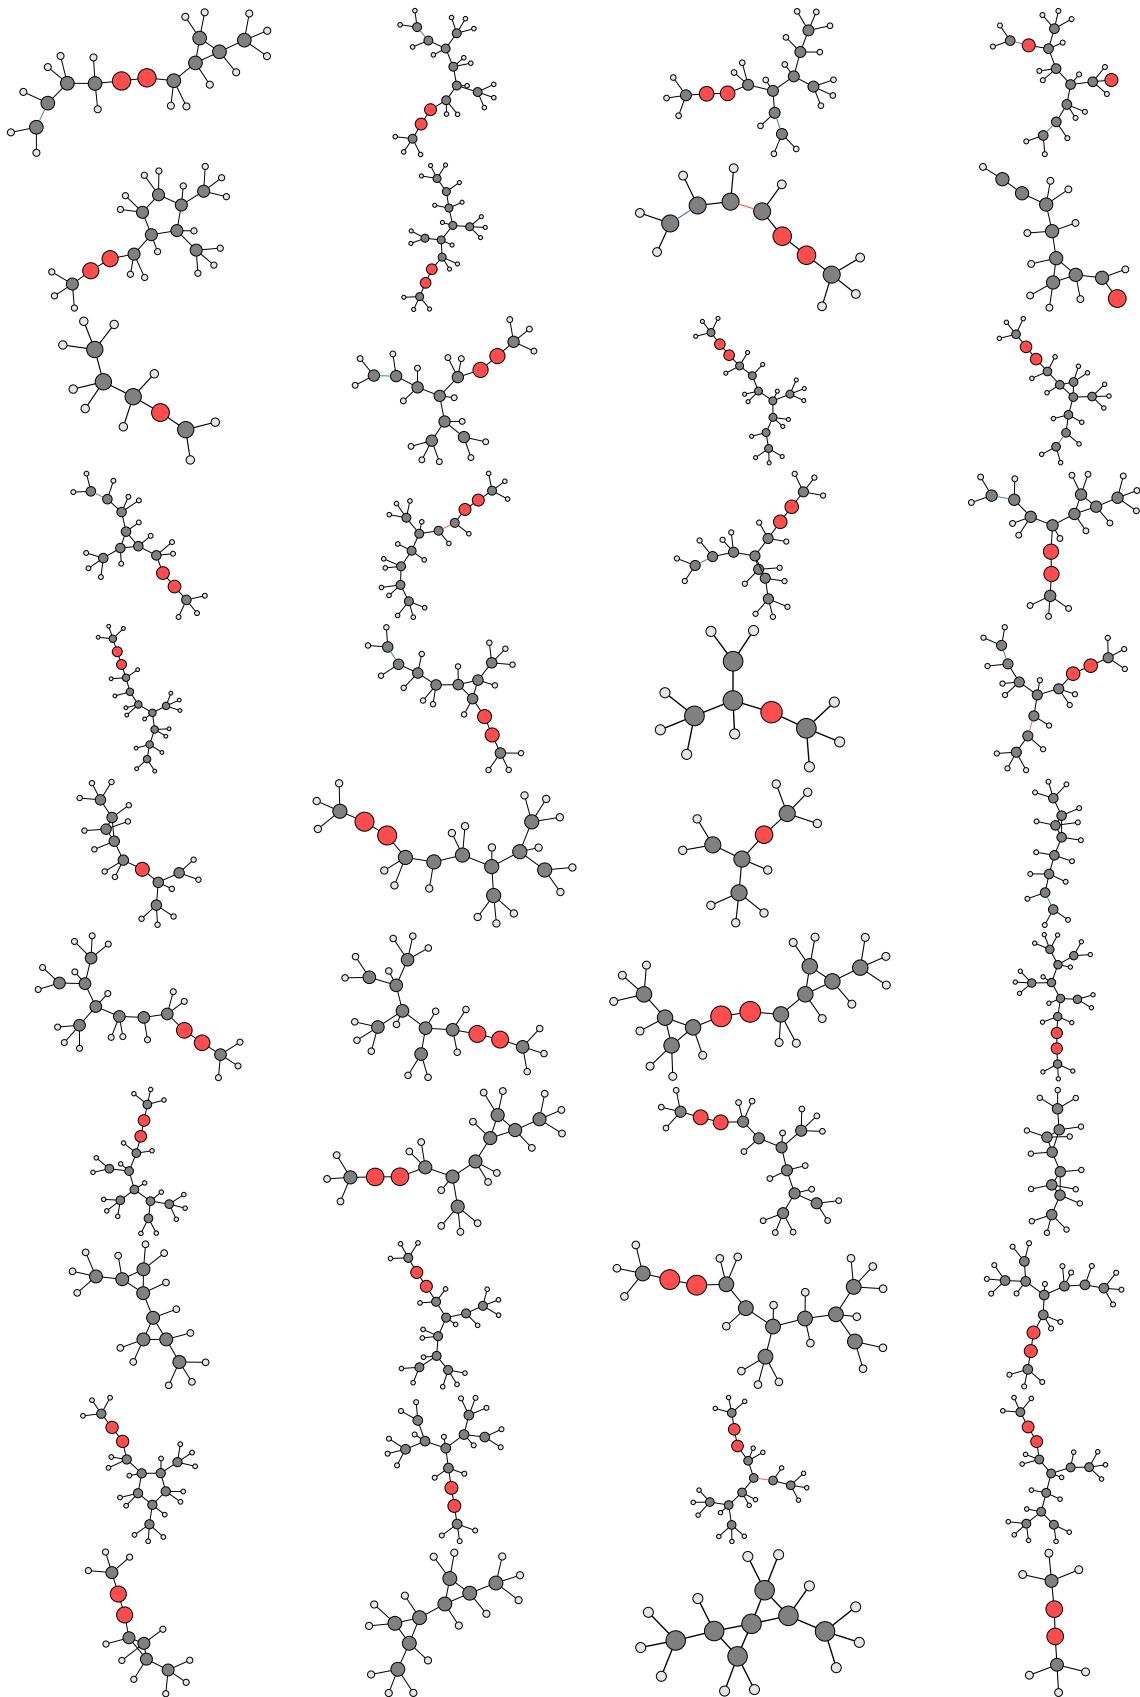

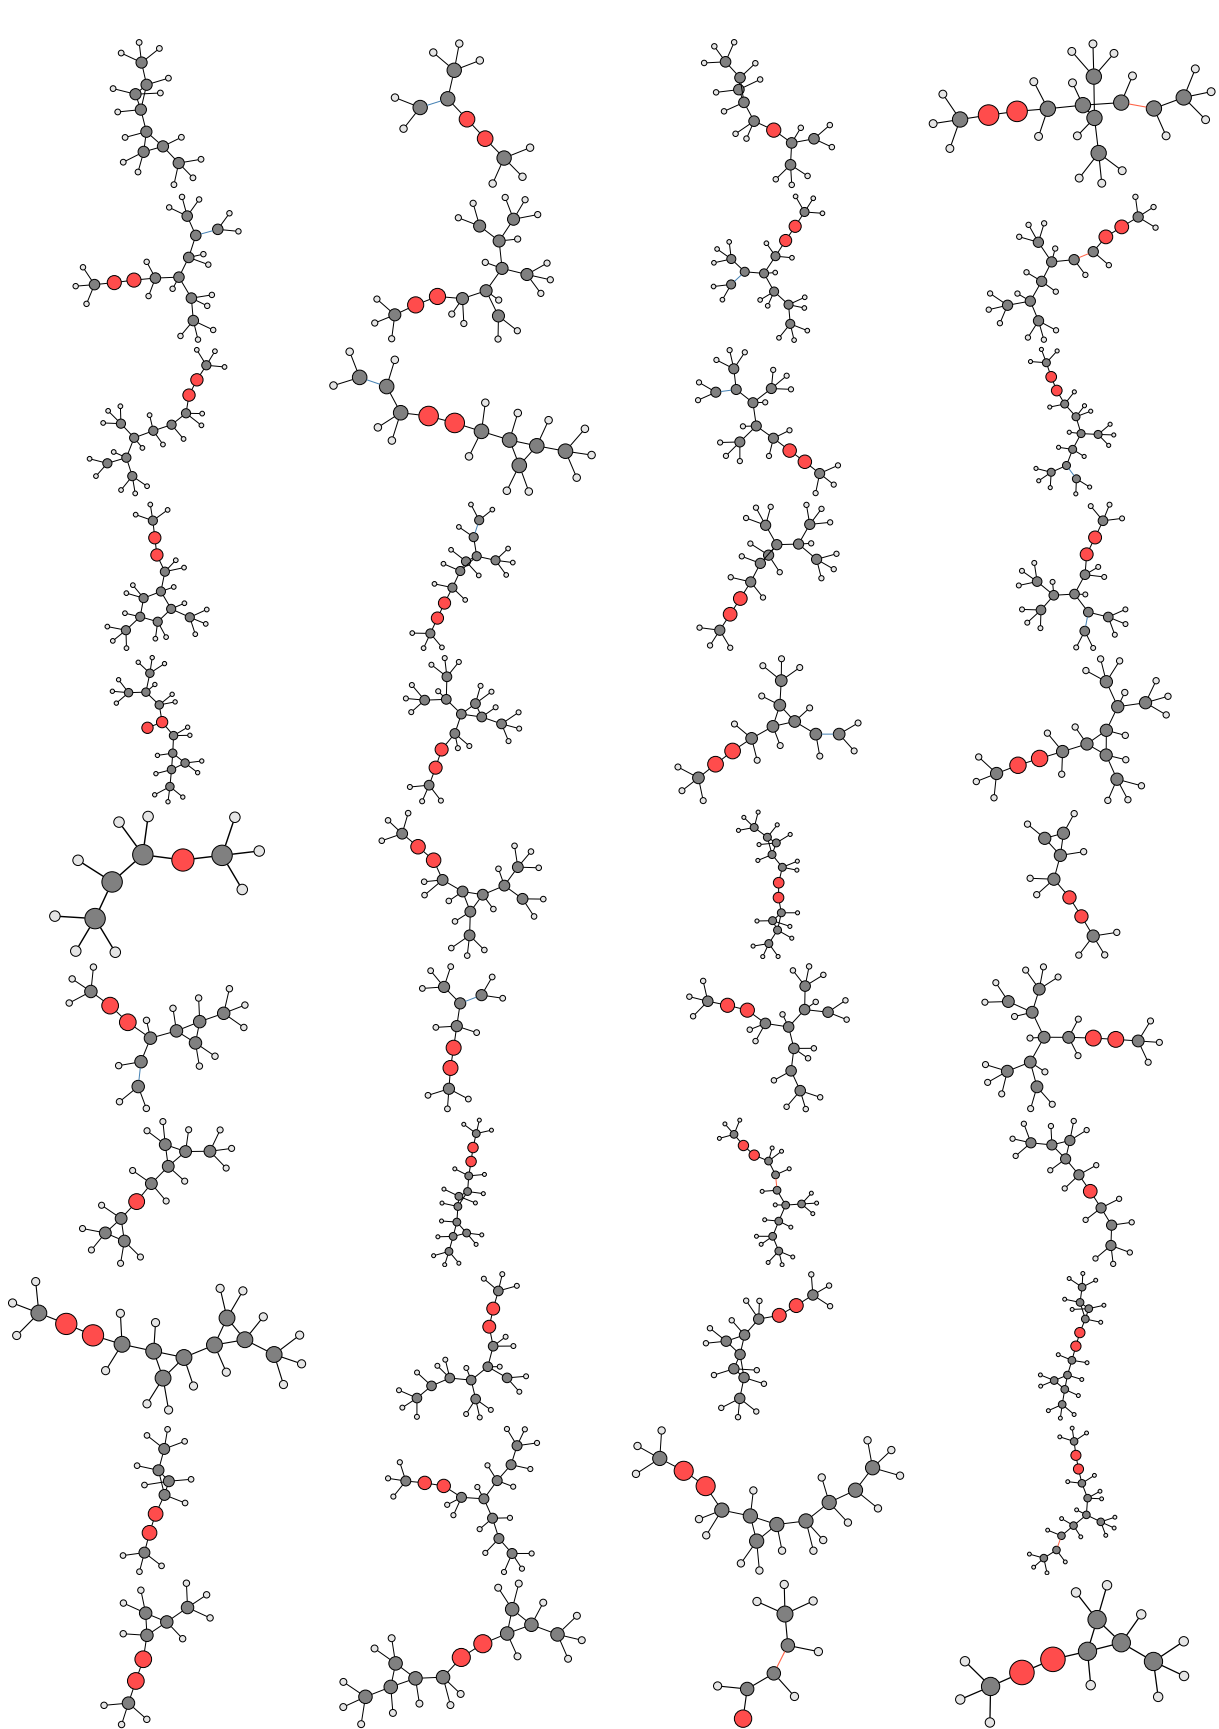

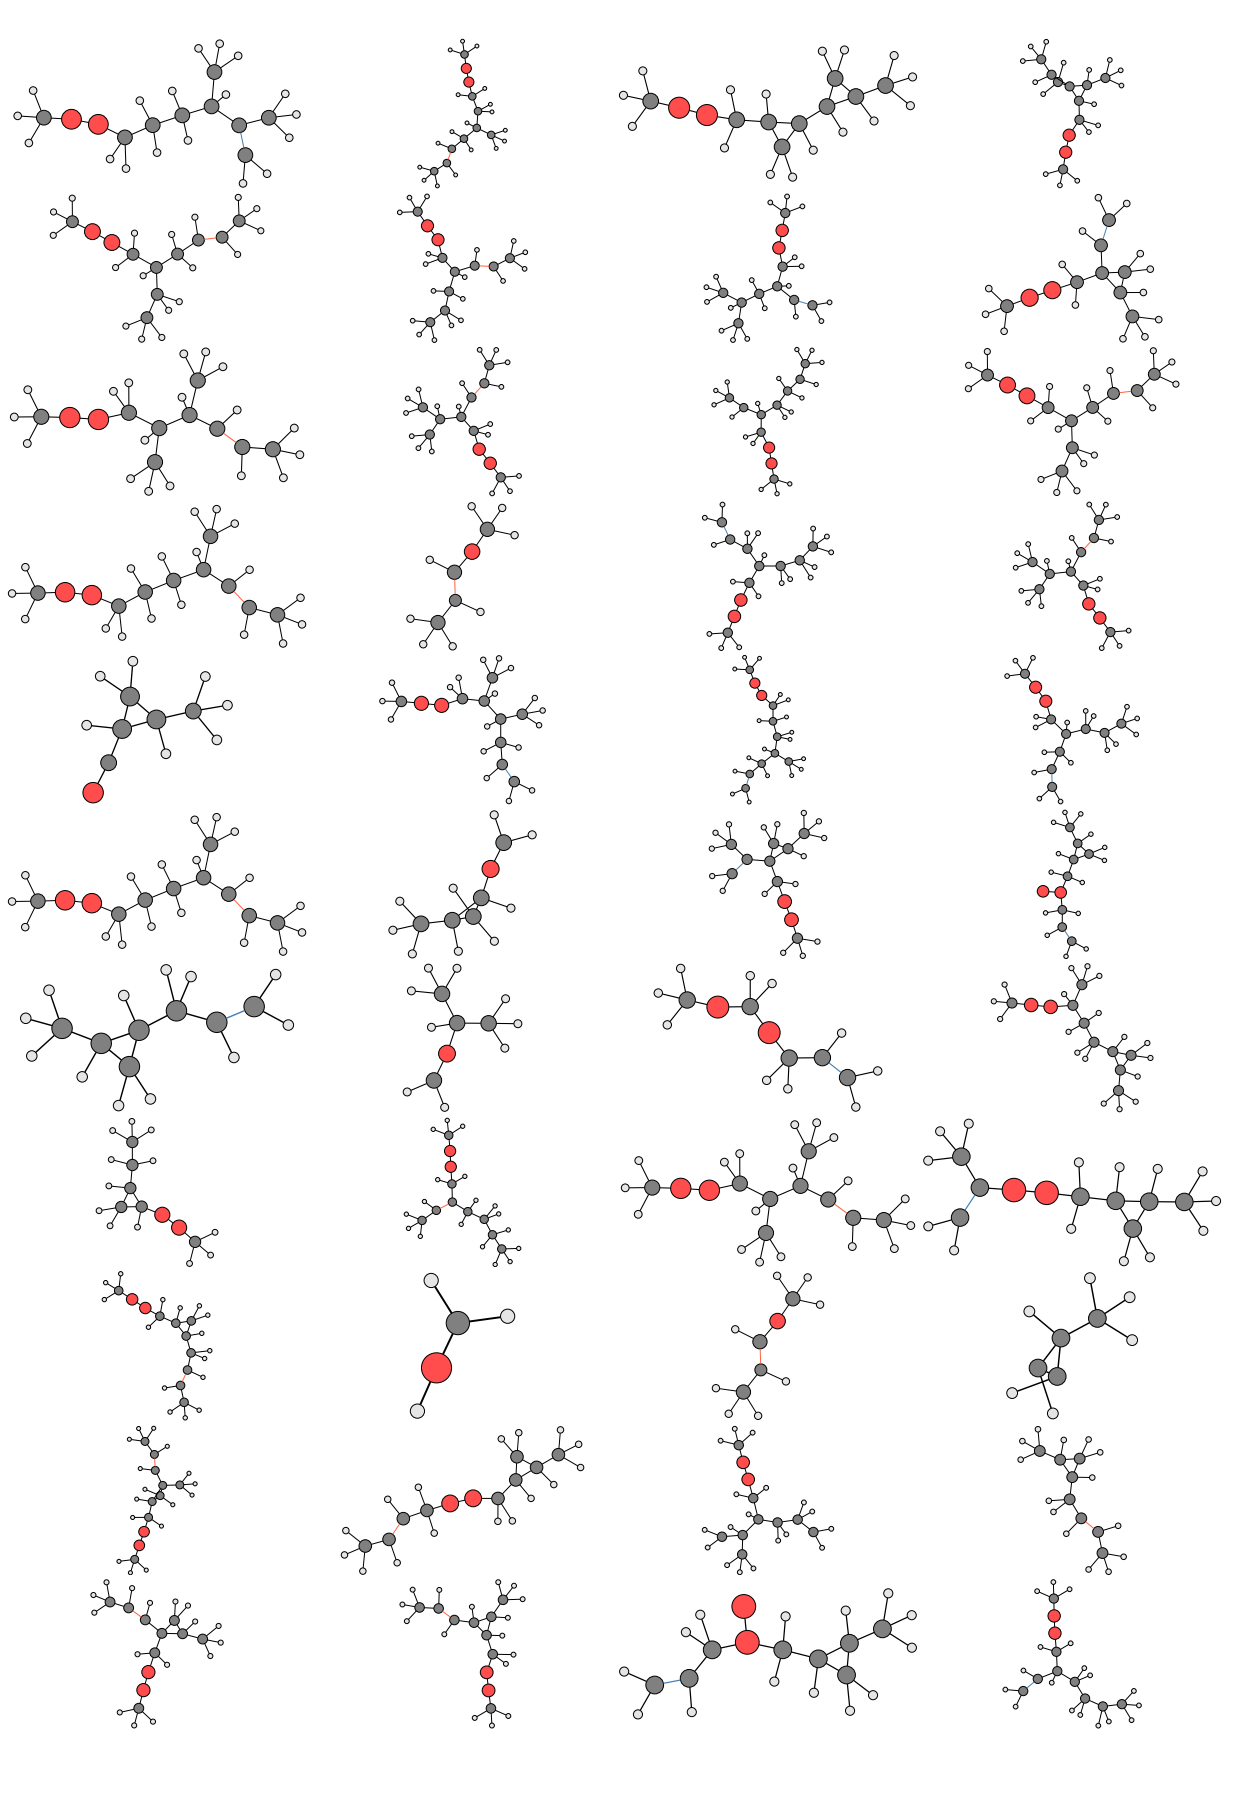



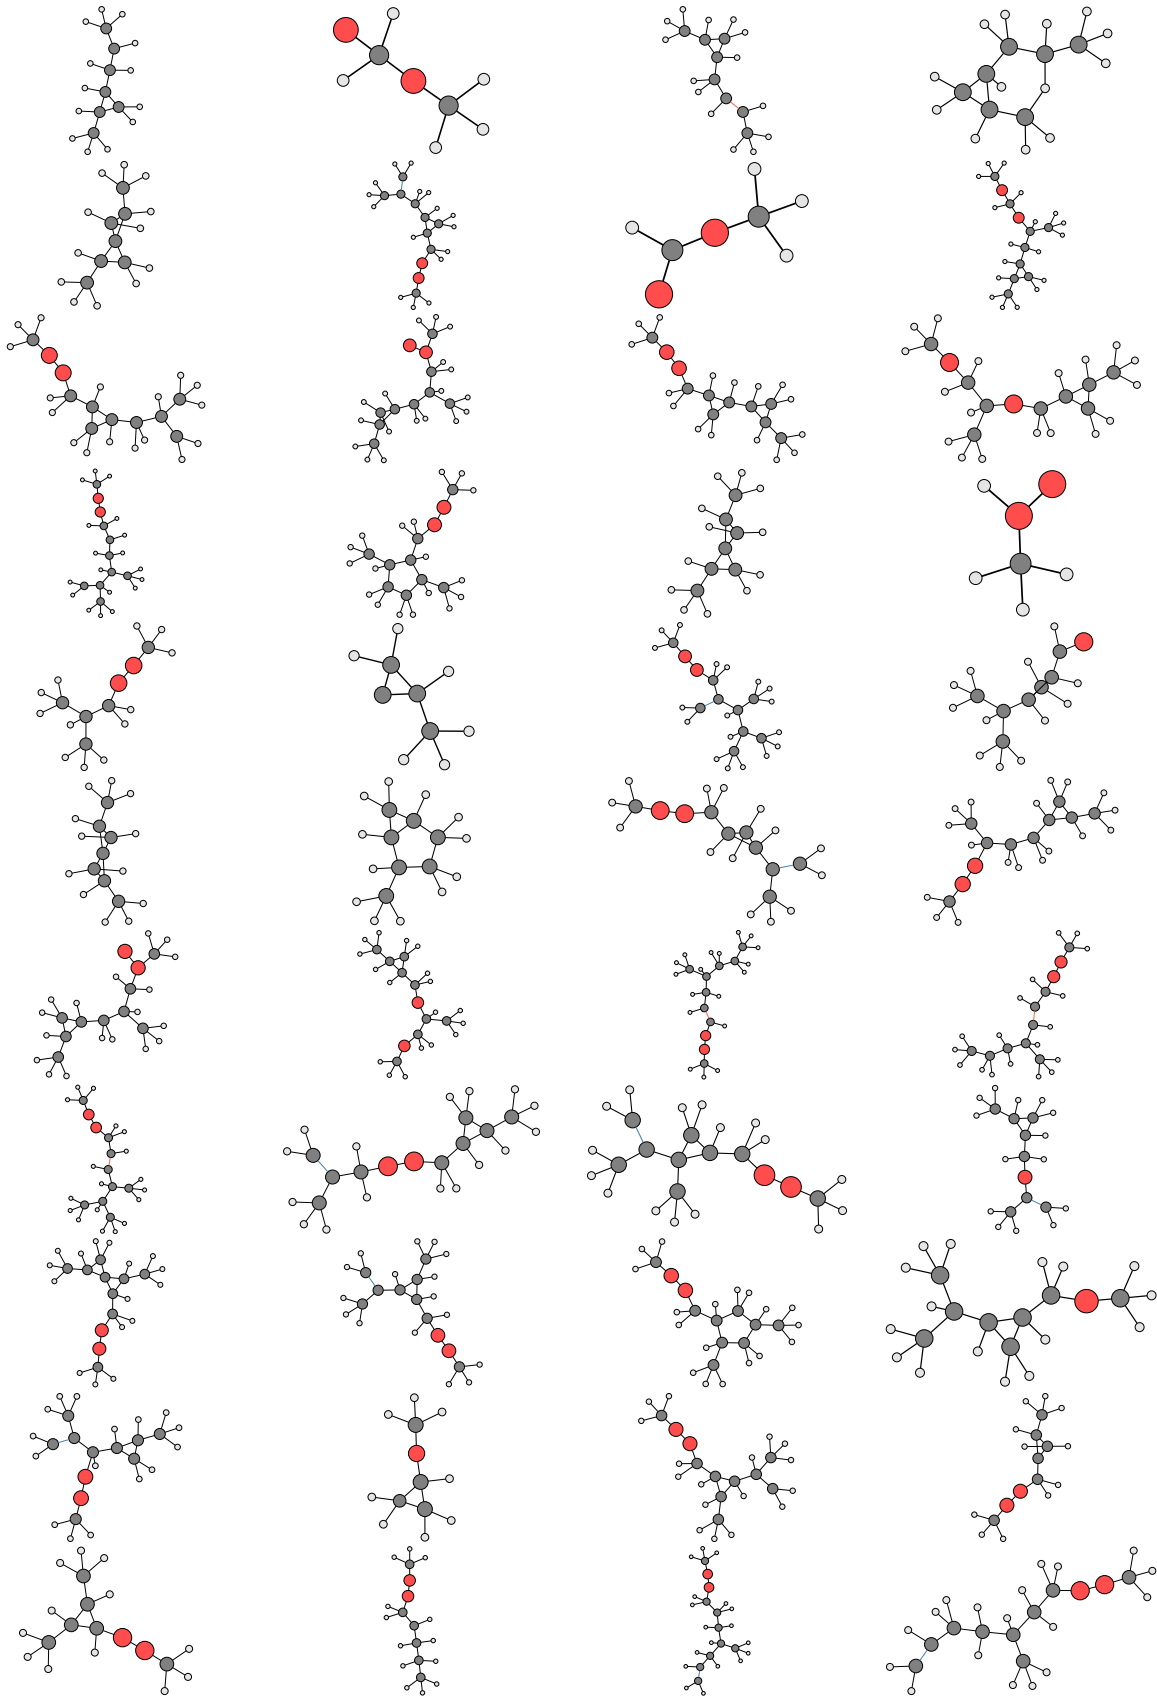

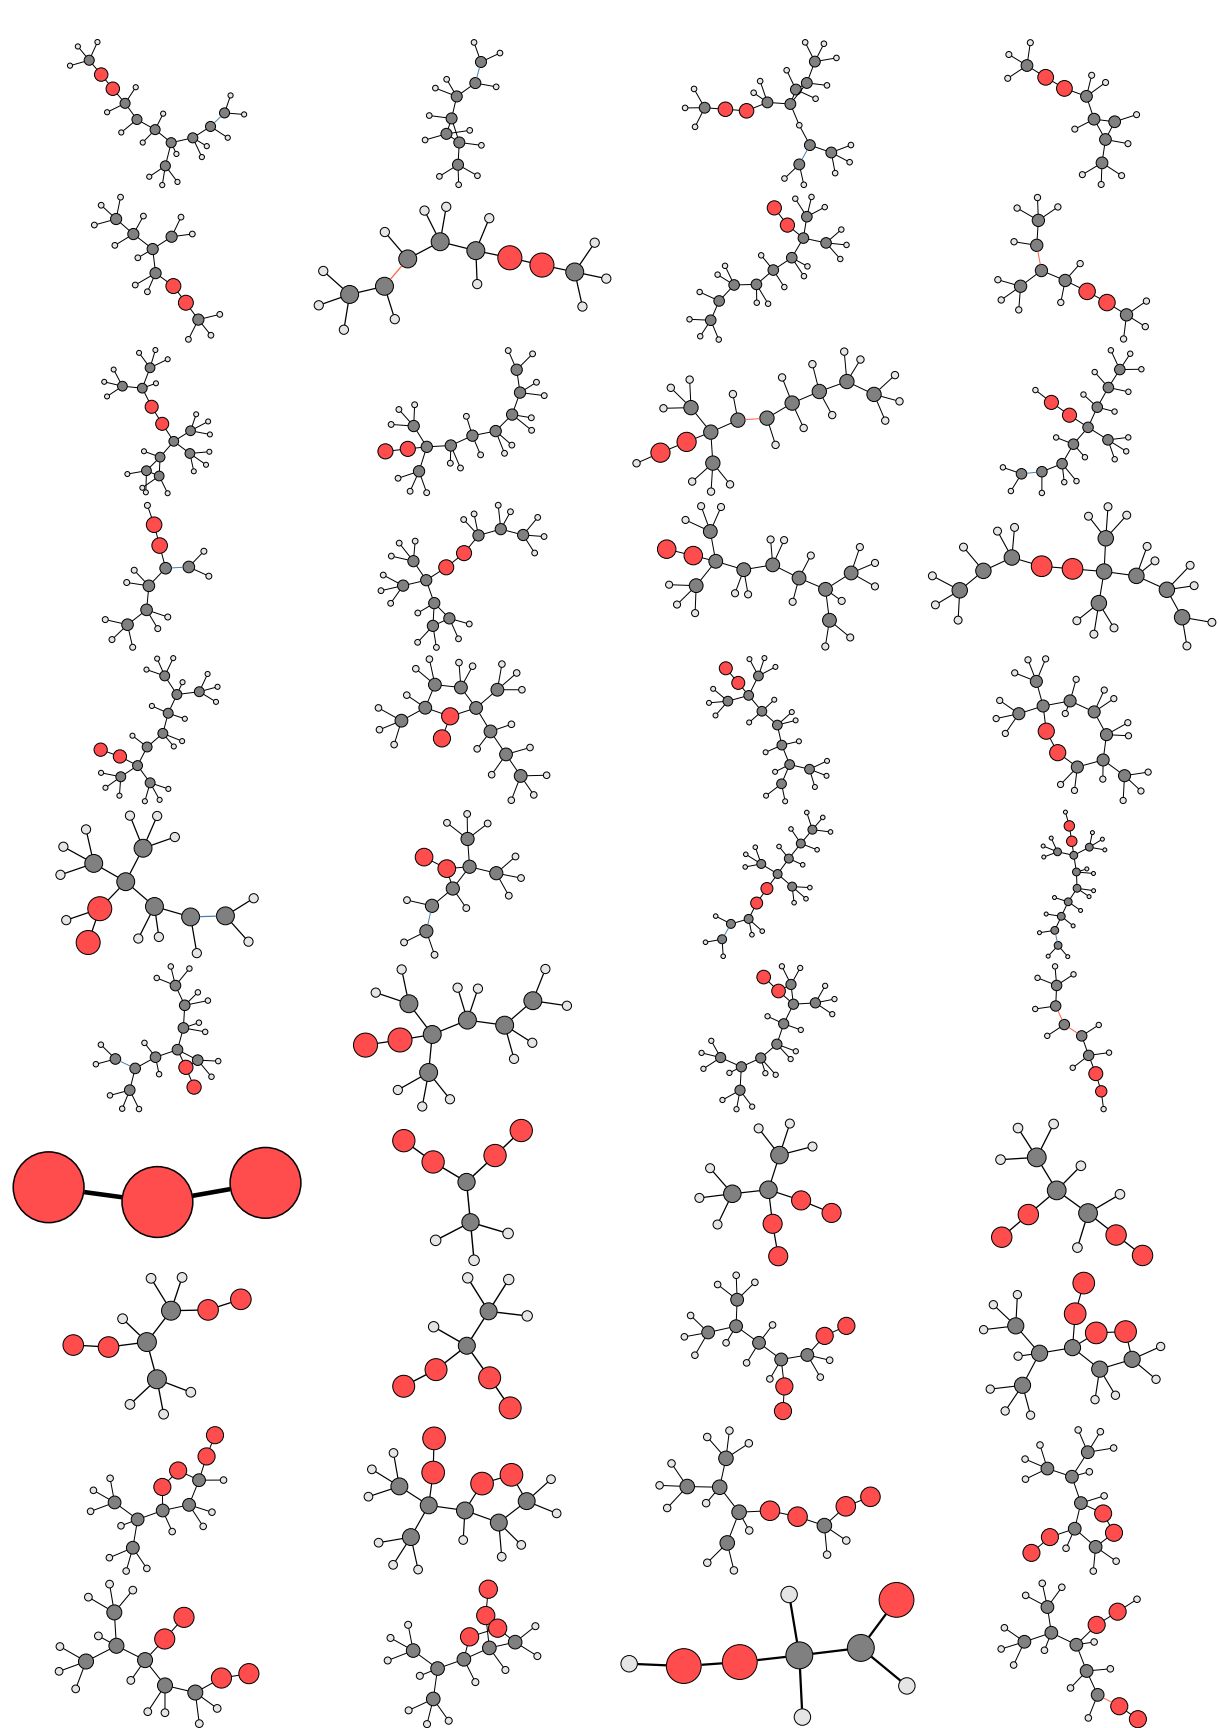

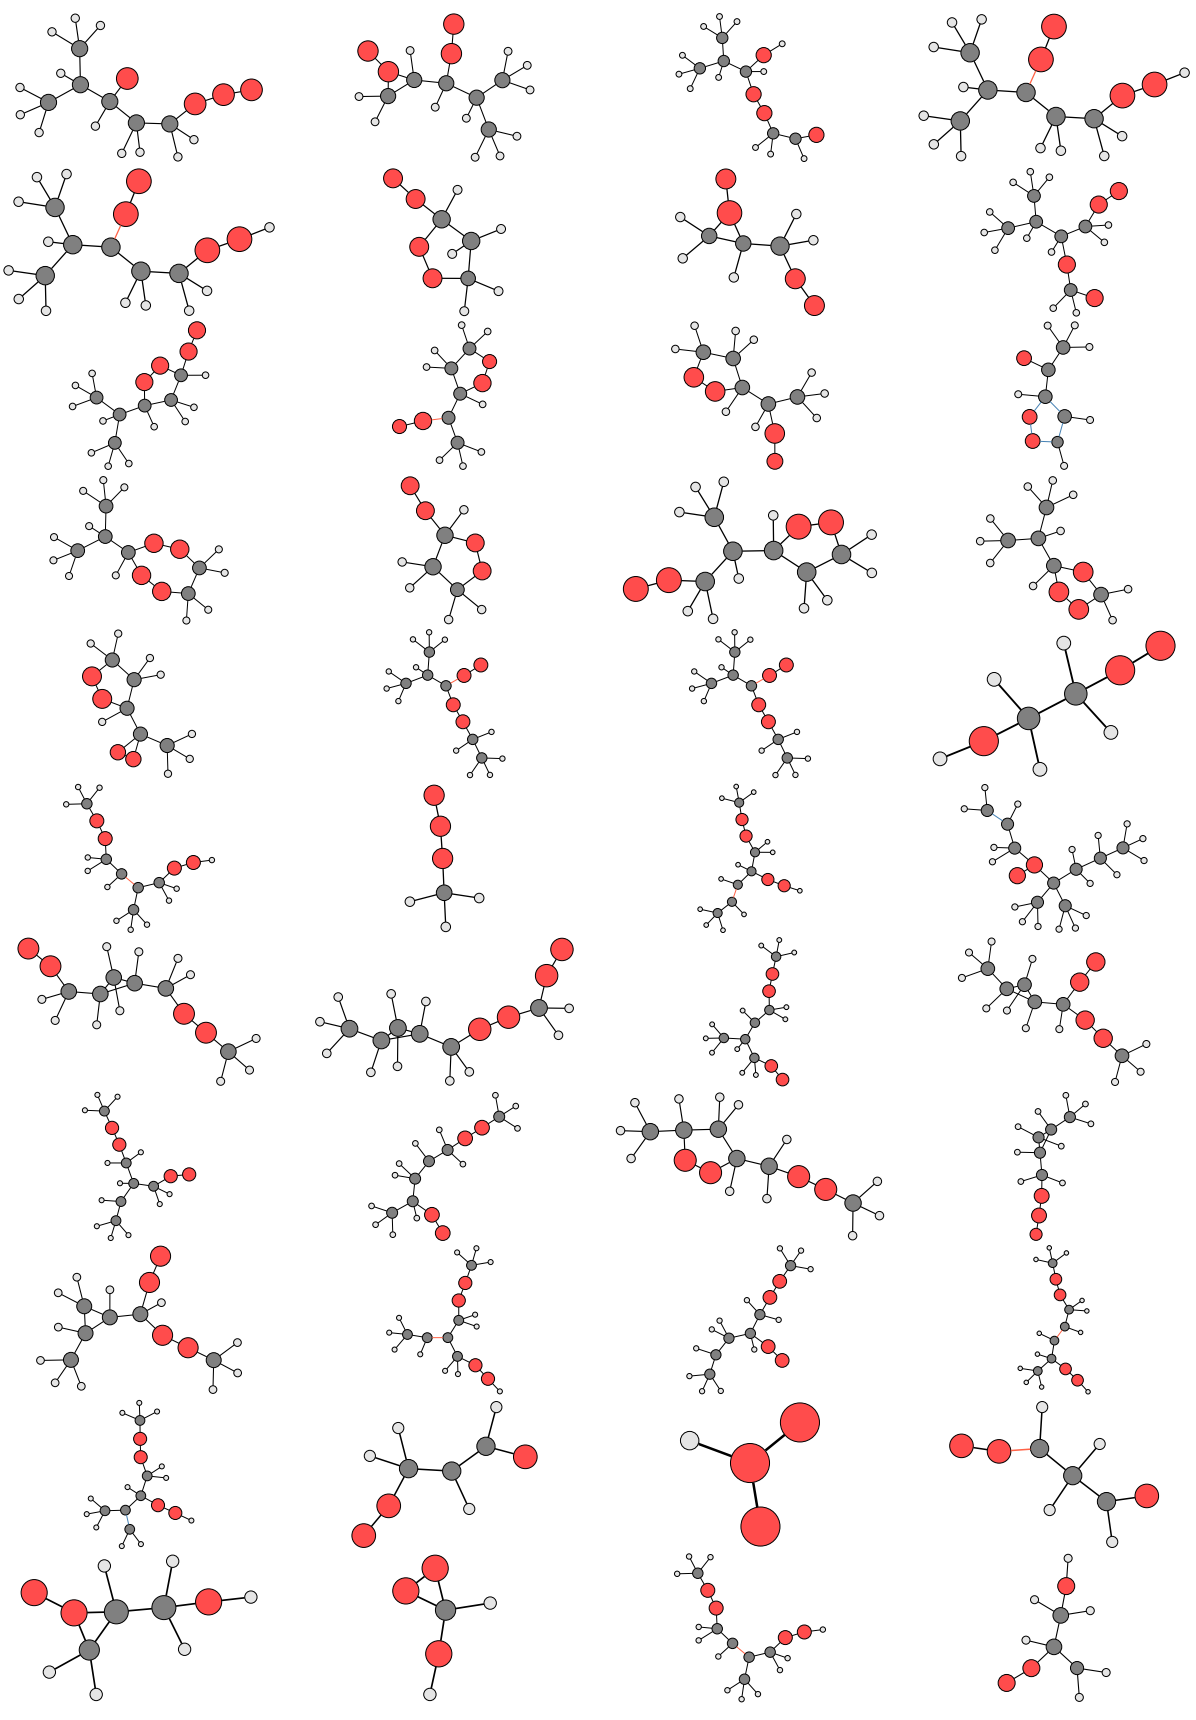

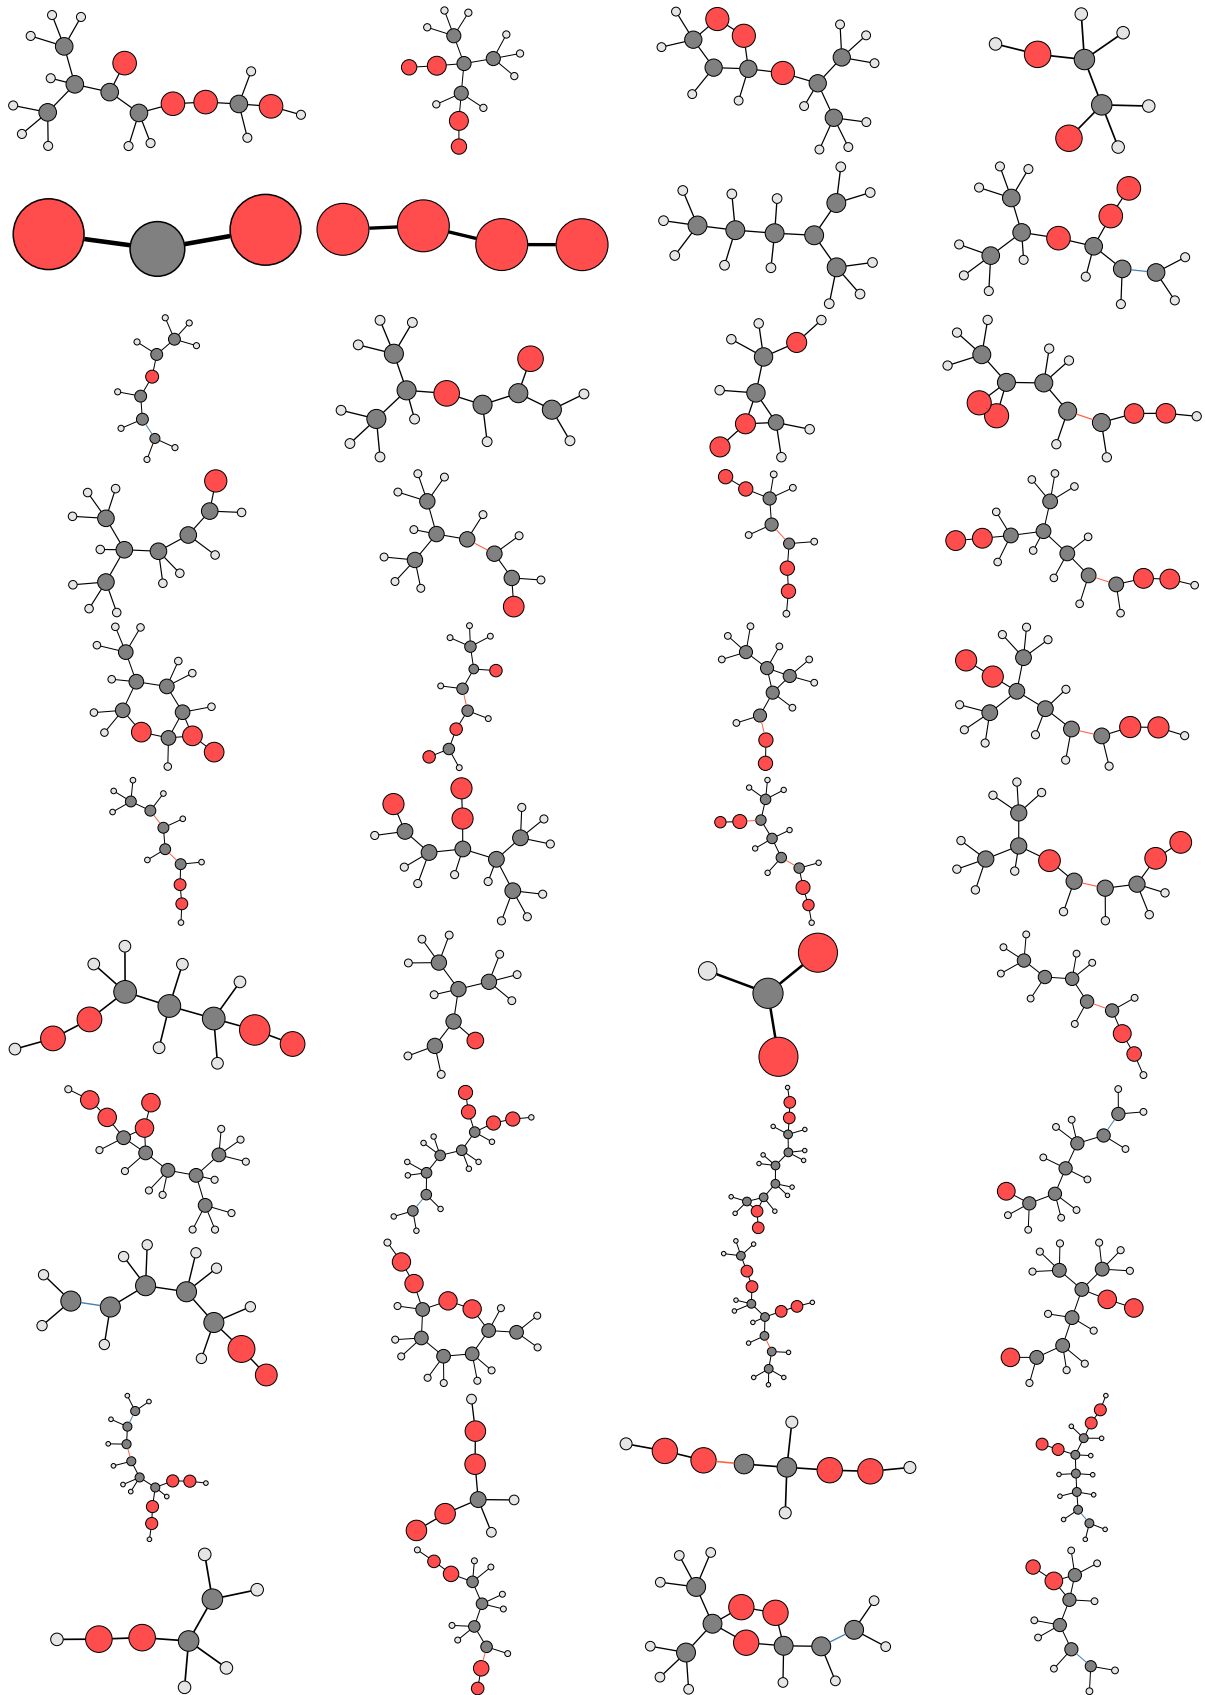

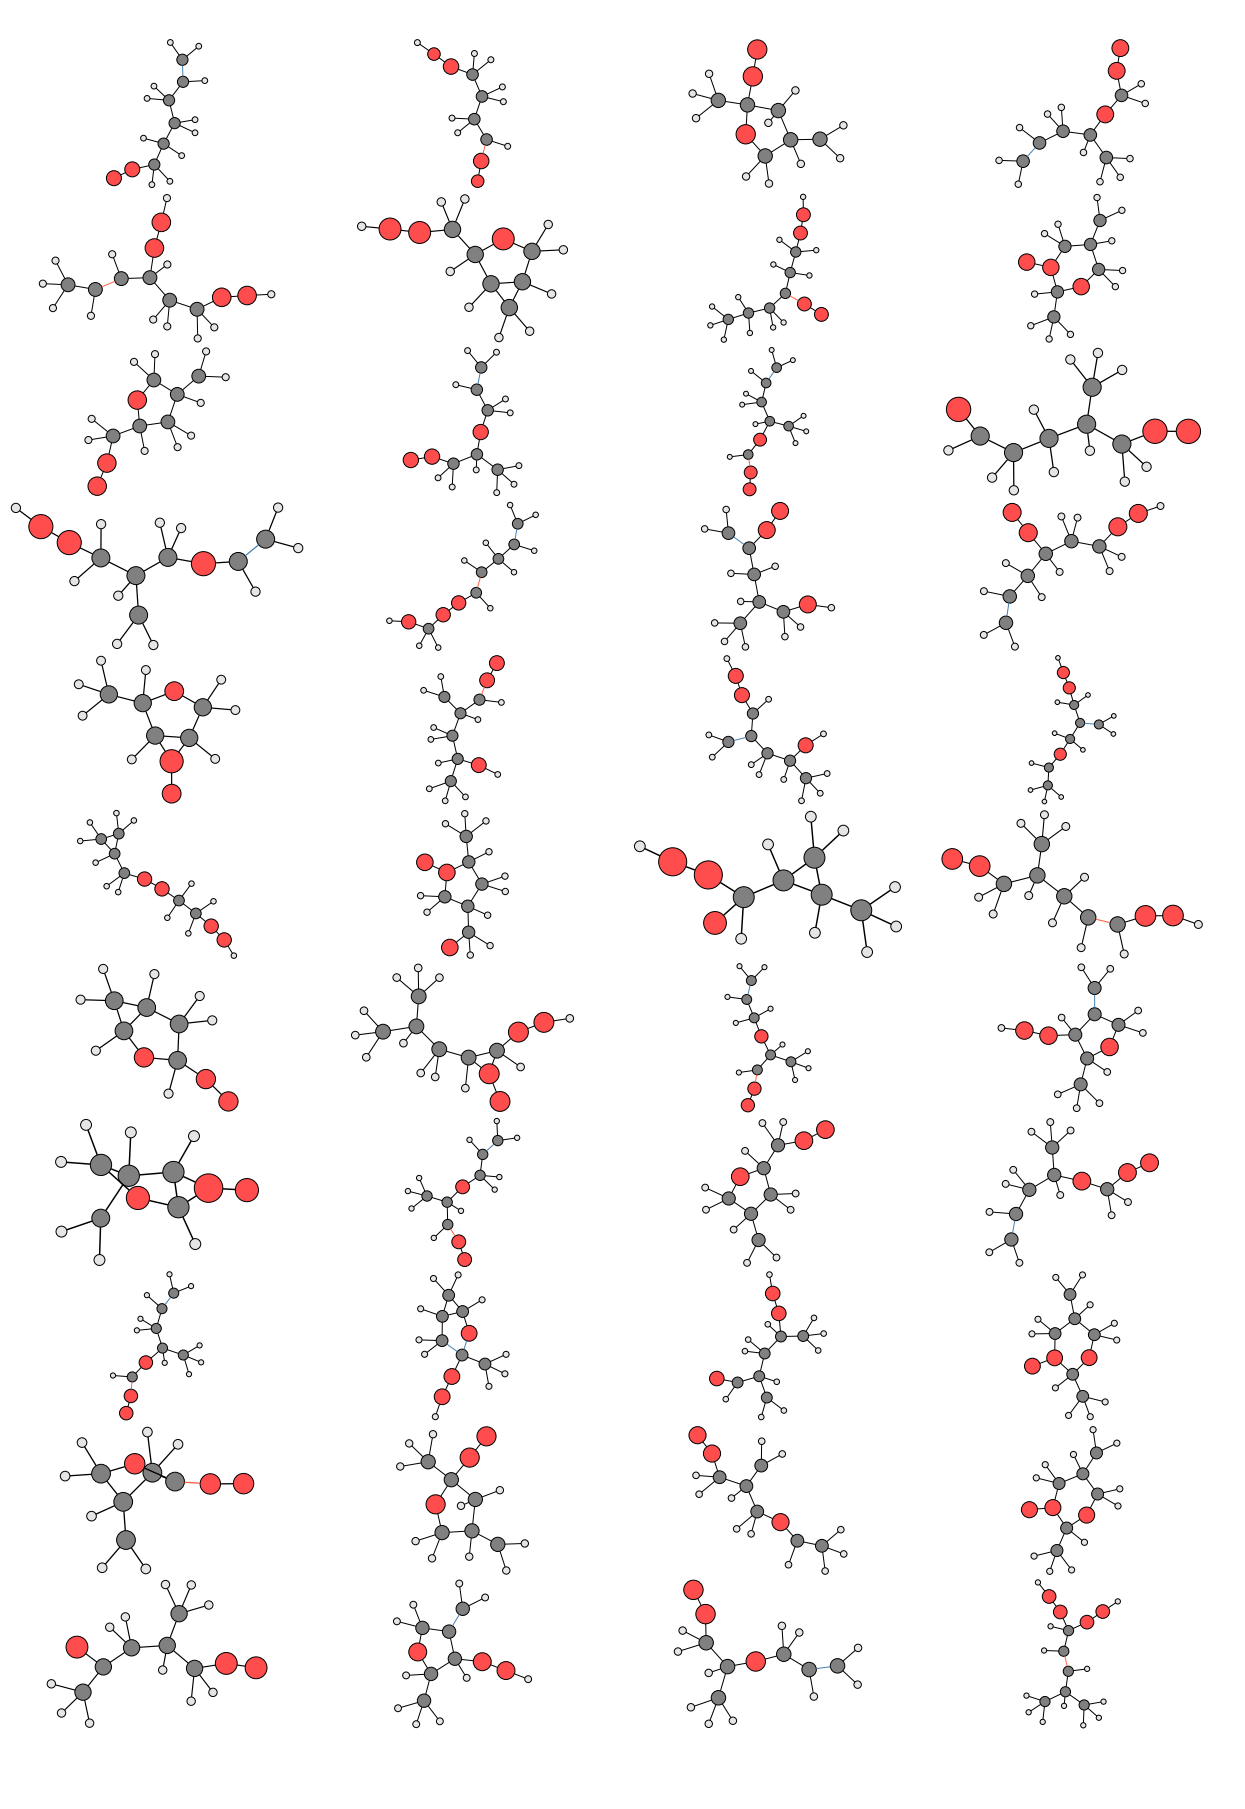

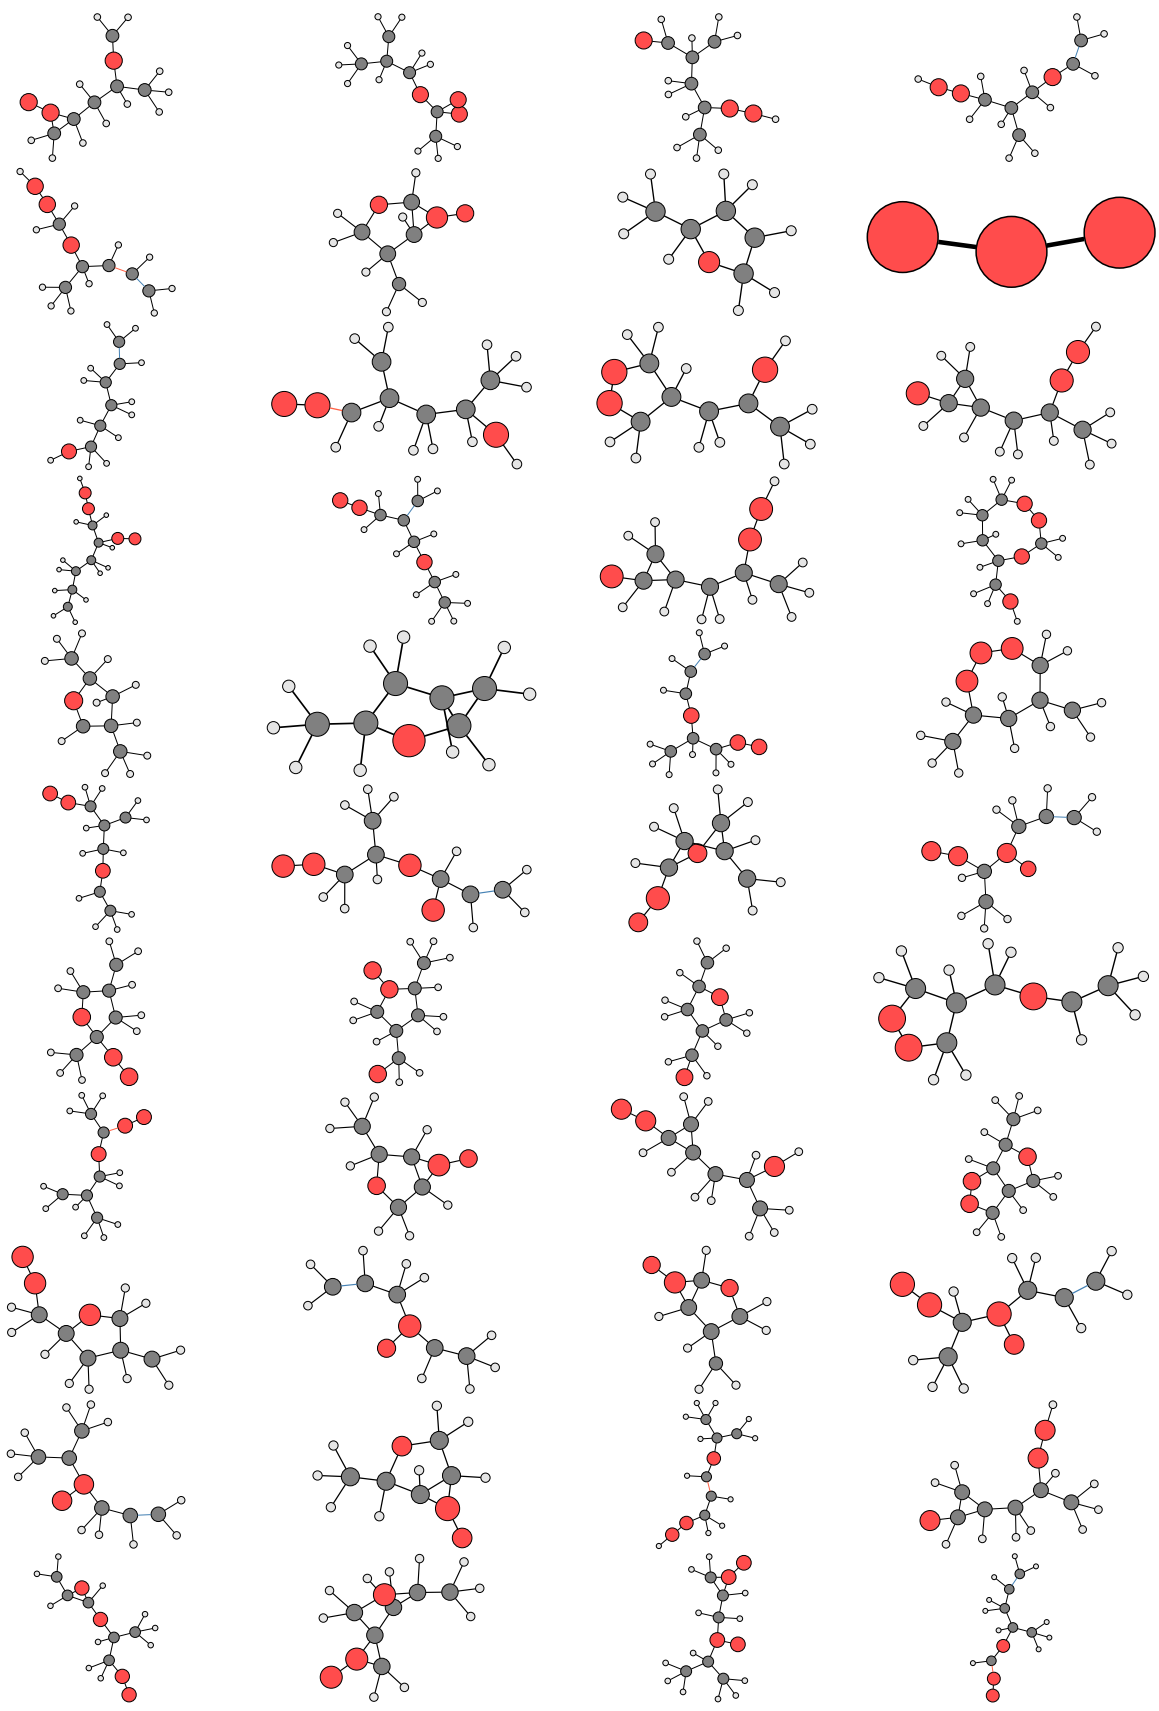

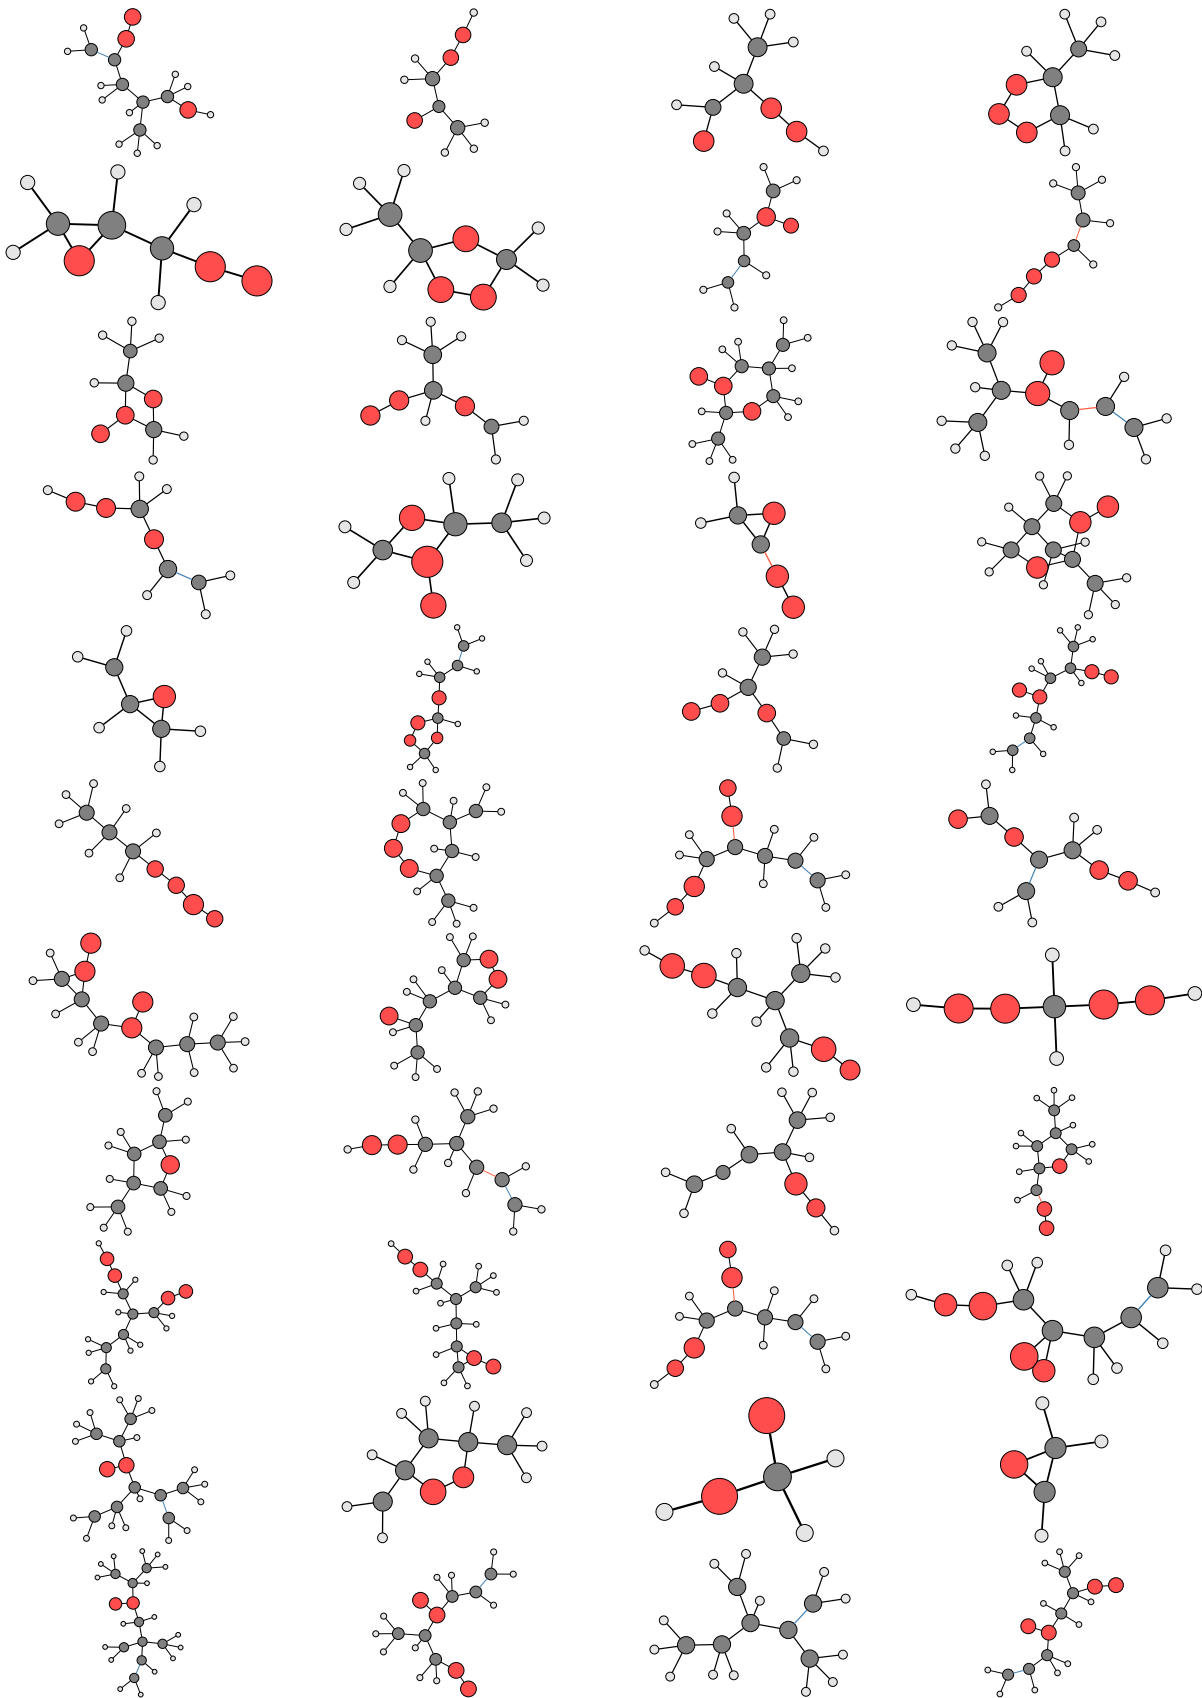

Supplement: 11244_2021_1543_MOESM1_ESM.pdf [file 11244_2021_1543_MOESM1_ESM.pdf]
